# Supplementary material for: PGE2 Supplementation of Oocyte Culture Media Improves the Developmental and Cryotolerance Performance of Bovine Blastocysts Derived From a Serum-Free in vitro Production System, Mirroring the Inner Cell Mass Transcriptome
Source: Front Cell Dev Biol. 2021 Jun 7;9:672948. doi: 10.3389/fcell.2021.672948 (PMC8215579; doi:10.3389/fcell.2021.672948)
Supplement: Supplementary file 5 [file Data_Sheet_1.xlsx]

## Sheet: summary
	summary of sheet	between-groups PCA
	title of the sheet	description
	dimension1_negatively	genes negatively associated to dimension1, contributing to 70% of the dimension
	dimension1_positively	genes positively associated to dimension1, contributing to 70% of the dimension
	dimension2_negatively	genes negatively associated to dimension2, contributing to 70% of the dimension
	dimension2_positively	genes positively associated to dimension2, contributing to 70% of the dimension

## Sheet: dimension1_negatively 
Axis1	Gene stable ID	Gene name	Gene description
-100	ENSBTAG00000017801	ATP6AP2	ATPase H+ transporting accessory protein 2 [Source:NCBI gene (formerly Entrezgene);Acc:513520]
-99.9999	ENSBTAG00000034633	ERO1B	endoplasmic reticulum oxidoreductase 1 beta [Source:VGNC Symbol;Acc:VGNC:28595]
-99.9995	ENSBTAG00000015142	MAPKBP1	mitogen-activated protein kinase binding protein 1 [Source:VGNC Symbol;Acc:VGNC:31231]
-99.9995	ENSBTAG00000053721	RHOV	ras homolog family member V [Source:NCBI gene (formerly Entrezgene);Acc:538143]
-99.9992	ENSBTAG00000033015	FAHD1	fumarylacetoacetate hydrolase domain containing 1 [Source:VGNC Symbol;Acc:VGNC:28708]
-99.9987	ENSBTAG00000053542	MMP12	matrix metallopeptidase 12 [Source:NCBI gene (formerly Entrezgene);Acc:526981]
-99.9982	ENSBTAG00000020456	AGPAT3	1-acylglycerol-3-phosphate O-acyltransferase 3 [Source:VGNC Symbol;Acc:VGNC:25736]
-99.9982	ENSBTAG00000004059	SOAT1	sterol O-acyltransferase 1 [Source:VGNC Symbol;Acc:VGNC:35116]
-99.9975	ENSBTAG00000009384	AGTRAP	angiotensin II receptor associated protein [Source:VGNC Symbol;Acc:VGNC:25747]
-99.9959	ENSBTAG00000005400	ATG5	autophagy related 5 [Source:VGNC Symbol;Acc:VGNC:56361]
-99.9936	ENSBTAG00000018381	CRLF3	cytokine receptor like factor 3 [Source:VGNC Symbol;Acc:VGNC:27718]
-99.9934	ENSBTAG00000004805	ITFG1	integrin alpha FG-GAP repeat containing 1 [Source:VGNC Symbol;Acc:VGNC:30308]
-99.9934	ENSBTAG00000017566	TUFT1	tuftelin 1 [Source:VGNC Symbol;Acc:VGNC:36518]
-99.992	ENSBTAG00000016563	GOLGA4	golgin A4 [Source:VGNC Symbol;Acc:VGNC:29485]
-99.9918	ENSBTAG00000016378	LRP10	LDL receptor related protein 10 [Source:VGNC Symbol;Acc:VGNC:30987]
-99.991	ENSBTAG00000005432	CAPG	capping actin protein, gelsolin like [Source:VGNC Symbol;Acc:VGNC:26739]
-99.9899	ENSBTAG00000046367	ZNF383	zinc finger protein 383 [Source:HGNC Symbol;Acc:HGNC:18609]
-99.9878	ENSBTAG00000003815	EDEM2	ER degradation enhancing alpha-mannosidase like protein 2 [Source:VGNC Symbol;Acc:VGNC:28323]
-99.9874	ENSBTAG00000048976	ENSBTAG00000048976
-99.9859	ENSBTAG00000053396	ENSBTAG00000053396	endogenous retrovirus group PABLB member 1 Env polyprotein [Source:NCBI gene (formerly Entrezgene);Acc:104969408]
-99.9849	ENSBTAG00000004489	APPBP2	amyloid beta precursor protein binding protein 2 [Source:VGNC Symbol;Acc:VGNC:26039]
-99.9769	ENSBTAG00000009889	ZNF181	zinc finger protein 181 [Source:NCBI gene (formerly Entrezgene);Acc:767826]
-99.975	ENSBTAG00000019938	N4BP1	NEDD4 binding protein 1 [Source:VGNC Symbol;Acc:VGNC:31852]
-99.9712	ENSBTAG00000008341	ARSB	arylsulfatase B [Source:VGNC Symbol;Acc:VGNC:26176]
-99.9711	ENSBTAG00000051208	ENSBTAG00000051208
-99.9709	ENSBTAG00000049571	CNOT6L	CCR4-NOT transcription complex subunit 6 like [Source:VGNC Symbol;Acc:VGNC:27521]
-99.9672	ENSBTAG00000018151	HELQ	helicase, POLQ like [Source:NCBI gene (formerly Entrezgene);Acc:539372]
-99.9647	ENSBTAG00000018000	CLN3	CLN3 lysosomal/endosomal transmembrane protein, battenin [Source:NCBI gene (formerly Entrezgene);Acc:504799]
-99.96	ENSBTAG00000004995	C1GALT1	core 1 synthase, glycoprotein-N-acetylgalactosamine 3-beta-galactosyltransferase 1 [Source:VGNC Symbol;Acc:VGNC:26615]
-99.9594	ENSBTAG00000012991	PRUNE2	prune homolog 2 with BCH domain [Source:VGNC Symbol;Acc:VGNC:33429]
-99.9516	ENSBTAG00000015195	NPC1	NPC intracellular cholesterol transporter 1 [Source:VGNC Symbol;Acc:VGNC:32194]
-99.9476	ENSBTAG00000011866	PCBD1	pterin-4 alpha-carbinolamine dehydratase 1 [Source:VGNC Symbol;Acc:VGNC:32612]
-99.9452	ENSBTAG00000016779	CLIP1	CAP-Gly domain containing linker protein 1 [Source:VGNC Symbol;Acc:VGNC:27444]
-99.945	ENSBTAG00000023411	ENSBTAG00000023411	serotransferrin-like [Source:NCBI gene (formerly Entrezgene);Acc:525947]
-99.9445	ENSBTAG00000045550	TSPAN6	tetraspanin 6 [Source:VGNC Symbol;Acc:VGNC:36441]
-99.9443	ENSBTAG00000020330	BTG1	BTG anti-proliferation factor 1 [Source:VGNC Symbol;Acc:VGNC:26597]
-99.9439	ENSBTAG00000046204	ZNF705A	zinc finger protein 705A [Source:NCBI gene (formerly Entrezgene);Acc:100125413]
-99.9437	ENSBTAG00000007931	SLC38A6	solute carrier family 38 member 6 [Source:VGNC Symbol;Acc:VGNC:34853]
-99.943	ENSBTAG00000054175	ENSBTAG00000054175
-99.942	ENSBTAG00000016250	AKTIP	AKT interacting protein [Source:VGNC Symbol;Acc:VGNC:25801]
-99.9393	ENSBTAG00000051661	ENSBTAG00000051661
-99.9392	ENSBTAG00000004227	TBCK	TBC1 domain containing kinase [Source:VGNC Symbol;Acc:VGNC:35655]
-99.9352	ENSBTAG00000015254	GLB1	galactosidase beta 1 [Source:VGNC Symbol;Acc:VGNC:29391]
-99.9345	ENSBTAG00000017139	STX7	syntaxin 7 [Source:VGNC Symbol;Acc:VGNC:35443]
-99.9282	ENSBTAG00000020097	PERP	p53 apoptosis effector related to PMP22 [Source:NCBI gene (formerly Entrezgene);Acc:509485]
-99.9205	ENSBTAG00000021875	SLC41A2	solute carrier family 41 member 2 [Source:VGNC Symbol;Acc:VGNC:34874]
-99.9161	ENSBTAG00000004024	UBE2Q2	ubiquitin conjugating enzyme E2 Q2 [Source:VGNC Symbol;Acc:VGNC:36593]
-99.9149	ENSBTAG00000004557	DHRS9	dehydrogenase/reductase 9 [Source:VGNC Symbol;Acc:VGNC:28046]
-99.9059	ENSBTAG00000010871	ENSBTAG00000010871
-99.905	ENSBTAG00000010422	MDM2	MDM2 proto-oncogene [Source:VGNC Symbol;Acc:VGNC:31336]
-99.8984	ENSBTAG00000013860	GADD45A	growth arrest and DNA damage inducible alpha [Source:VGNC Symbol;Acc:VGNC:29206]
-99.8956	ENSBTAG00000009844	CCN1	cellular communication network factor 1 [Source:VGNC Symbol;Acc:VGNC:50270]
-99.8944	ENSBTAG00000020384	WDR47	WD repeat domain 47 [Source:VGNC Symbol;Acc:VGNC:36903]
-99.8757	ENSBTAG00000013664	FILIP1L	filamin A interacting protein 1 like [Source:VGNC Symbol;Acc:VGNC:29013]
-99.8644	ENSBTAG00000007116	ARRDC3	arrestin domain containing 3 [Source:VGNC Symbol;Acc:VGNC:26173]
-99.8588	ENSBTAG00000007013	TOM1L1	target of myb1 like 1 membrane trafficking protein [Source:VGNC Symbol;Acc:VGNC:36218]
-99.8358	ENSBTAG00000030319	GBGT1	globoside alpha-1,3-N-acetylgalactosaminyltransferase 1 [Source:VGNC Symbol;Acc:VGNC:59217]
-99.8351	ENSBTAG00000003232	RAB29	RAB29, member RAS oncogene family [Source:VGNC Symbol;Acc:VGNC:33636]
-99.8311	ENSBTAG00000020355	KLF4	Kruppel like factor 4 [Source:VGNC Symbol;Acc:VGNC:52790]
-99.8274	ENSBTAG00000046773	MCOLN2	mucolipin 2 [Source:VGNC Symbol;Acc:VGNC:31319]
-99.8247	ENSBTAG00000005714	ACTC1	actin alpha cardiac muscle 1 [Source:VGNC Symbol;Acc:VGNC:25574]
-99.8225	ENSBTAG00000021291	STXBP6	syntaxin binding protein 6 [Source:VGNC Symbol;Acc:VGNC:35450]
-99.8177	ENSBTAG00000014322	FAM234B	family with sequence similarity 234 member B [Source:VGNC Symbol;Acc:VGNC:28805]
-99.817	ENSBTAG00000002101	GDE1	glycerophosphodiester phosphodiesterase 1 [Source:VGNC Symbol;Acc:VGNC:29298]
-99.8116	ENSBTAG00000043561	COX1	cytochrome c oxidase subunit I [Source:NCBI gene (formerly Entrezgene);Acc:3283879]
-99.8115	ENSBTAG00000012976	WLS	Wnt ligand secretion mediator [Source:VGNC Symbol;Acc:VGNC:36948]
-99.8098	ENSBTAG00000014204	S100A16	S100 calcium binding protein A16 [Source:VGNC Symbol;Acc:VGNC:34241]
-99.8051	ENSBTAG00000004950	BRB	brain ribonuclease [Source:NCBI gene (formerly Entrezgene);Acc:280720]
-99.8049	ENSBTAG00000043571	ND2	NADH dehydrogenase subunit 2 [Source:NCBI gene (formerly Entrezgene);Acc:3283878]
-99.8033	ENSBTAG00000007335	TPD52	tumor protein D52 [Source:NCBI gene (formerly Entrezgene);Acc:540235]
-99.801	ENSBTAG00000005397	CD46	CD46 molecule [Source:NCBI gene (formerly Entrezgene);Acc:280851]
-99.7966	ENSBTAG00000044044	CLOCK	clock circadian regulator [Source:VGNC Symbol;Acc:VGNC:27456]
-99.7759	ENSBTAG00000020657	FAT1	FAT atypical cadherin 1 [Source:VGNC Symbol;Acc:VGNC:52771]
-99.7718	ENSBTAG00000031165	TRPM7	transient receptor potential cation channel subfamily M member 7 [Source:VGNC Symbol;Acc:VGNC:36393]
-99.7567	ENSBTAG00000051999	ENSBTAG00000051999
-99.7546	ENSBTAG00000005100	TMEM30A	transmembrane protein 30A [Source:VGNC Symbol;Acc:VGNC:36074]
-99.7449	ENSBTAG00000020262	PSME4	proteasome activator subunit 4 [Source:VGNC Symbol;Acc:VGNC:33476]
-99.7311	ENSBTAG00000000502	DAZL	deleted in azoospermia like [Source:VGNC Symbol;Acc:VGNC:53530]
-99.7167	ENSBTAG00000002746	OSTF1	osteoclast stimulating factor 1 [Source:VGNC Symbol;Acc:VGNC:32479]
-99.6912	ENSBTAG00000013419	HTATIP2	HIV-1 Tat interactive protein 2 [Source:VGNC Symbol;Acc:VGNC:29989]
-99.6868	ENSBTAG00000014659	NEMP1	nuclear envelope integral membrane protein 1 [Source:VGNC Symbol;Acc:VGNC:56223]
-99.6784	ENSBTAG00000009110	ENSBTAG00000009110	THO complex subunit 7 homolog [Source:NCBI gene (formerly Entrezgene);Acc:101907835]
-99.6707	ENSBTAG00000024928	TNFRSF1B	TNF receptor superfamily member 1B [Source:VGNC Symbol;Acc:VGNC:36165]
-99.6676	ENSBTAG00000002603	PRPF39	pre-mRNA processing factor 39 [Source:VGNC Symbol;Acc:VGNC:33377]
-99.6534	ENSBTAG00000015464	ENSBTAG00000015464
-99.6534	ENSBTAG00000021678	SLC31A1	solute carrier family 31 member 1 [Source:VGNC Symbol;Acc:VGNC:34813]
-99.653	ENSBTAG00000015991	CDH1	cadherin 1 [Source:VGNC Symbol;Acc:VGNC:27090]
-99.6479	ENSBTAG00000005379	SLC41A1	solute carrier family 41 member 1 [Source:VGNC Symbol;Acc:VGNC:34873]
-99.6436	ENSBTAG00000004075	IDI1	isopentenyl-diphosphate delta isomerase 1 [Source:NCBI gene (formerly Entrezgene);Acc:514293]
-99.6256	ENSBTAG00000019761	MANBA	mannosidase beta [Source:VGNC Symbol;Acc:VGNC:31167]
-99.6122	ENSBTAG00000019665	IL1RN	interleukin 1 receptor antagonist [Source:VGNC Symbol;Acc:VGNC:30136]
-99.6119	ENSBTAG00000009423	NIPAL1	NIPA like domain containing 1 [Source:VGNC Symbol;Acc:VGNC:32081]
-99.5869	ENSBTAG00000011954	SEC11C	SEC11 homolog C, signal peptidase complex subunit [Source:VGNC Symbol;Acc:VGNC:34402]
-99.5798	ENSBTAG00000015381	ARHGAP18	Rho GTPase activating protein 18 [Source:VGNC Symbol;Acc:VGNC:26078]
-99.5731	ENSBTAG00000017651	ENSBTAG00000017651
-99.5699	ENSBTAG00000003746	SCP2	sterol carrier protein 2 [Source:VGNC Symbol;Acc:VGNC:34361]
-99.5624	ENSBTAG00000050763	PXYLP1	2-phosphoxylose phosphatase 1 [Source:VGNC Symbol;Acc:VGNC:52811]
-99.5618	ENSBTAG00000049344	ENSBTAG00000049344
-99.5599	ENSBTAG00000016595	CYSTM1	cysteine rich transmembrane module containing 1 [Source:VGNC Symbol;Acc:VGNC:50308]
-99.5275	ENSBTAG00000017666	ABCC5	ATP binding cassette subfamily C member 5 [Source:VGNC Symbol;Acc:VGNC:25474]
-99.4754	ENSBTAG00000031958	ENSBTAG00000031958	hyaluronidase PH-20 [Source:NCBI gene (formerly Entrezgene);Acc:509761]
-99.4489	ENSBTAG00000010007	MAPK13	mitogen-activated protein kinase 13 [Source:VGNC Symbol;Acc:VGNC:50213]
-99.4477	ENSBTAG00000003221	ATF7IP	activating transcription factor 7 interacting protein [Source:VGNC Symbol;Acc:VGNC:26246]
-99.4445	ENSBTAG00000016104	BTAF1	B-TFIID TATA-box binding protein associated factor 1 [Source:VGNC Symbol;Acc:VGNC:55937]
-99.4396	ENSBTAG00000012705	DEGS1	delta 4-desaturase, sphingolipid 1 [Source:VGNC Symbol;Acc:VGNC:27990]
-99.4265	ENSBTAG00000014841	GBA	glucosylceramidase beta [Source:VGNC Symbol;Acc:VGNC:50183]
-99.4202	ENSBTAG00000017531	FETUB	fetuin B [Source:VGNC Symbol;Acc:VGNC:28955]
-99.4172	ENSBTAG00000015073	CRPPA	CDP-L-ribitol pyrophosphorylase A [Source:VGNC Symbol;Acc:VGNC:30303]
-99.401	ENSBTAG00000006795	GCSH	glycine cleavage system protein H [Source:NCBI gene (formerly Entrezgene);Acc:317723]
-99.3671	ENSBTAG00000001192	STX12	syntaxin 12 [Source:VGNC Symbol;Acc:VGNC:35432]
-99.367	ENSBTAG00000020416	PGAP1	post-GPI attachment to proteins inositol deacylase 1 [Source:VGNC Symbol;Acc:VGNC:32781]
-99.3596	ENSBTAG00000019708	ACSL6	acyl-CoA synthetase long chain family member 6 [Source:VGNC Symbol;Acc:VGNC:55153]
-99.3541	ENSBTAG00000049950	ENSBTAG00000049950
-99.3357	ENSBTAG00000018499	ANXA8L1	annexin A8-like 1 [Source:NCBI gene (formerly Entrezgene);Acc:281627]
-99.3307	ENSBTAG00000004197	B3GNT4	UDP-GlcNAc:betaGal beta-1,3-N-acetylglucosaminyltransferase 4 [Source:VGNC Symbol;Acc:VGNC:26380]
-99.322	ENSBTAG00000016915	FLT1	fms related receptor tyrosine kinase 1 [Source:VGNC Symbol;Acc:VGNC:29041]
-99.2849	ENSBTAG00000011147	RNF13	ring finger protein 13 [Source:VGNC Symbol;Acc:VGNC:34020]
-99.2819	ENSBTAG00000020642	ZDHHC13	zinc finger DHHC-type palmitoyltransferase 13 [Source:VGNC Symbol;Acc:VGNC:37128]
-99.2242	ENSBTAG00000021569	DDB1	damage specific DNA binding protein 1 [Source:VGNC Symbol;Acc:VGNC:27941]
-99.2218	ENSBTAG00000050847	ENSBTAG00000050847
-99.2135	ENSBTAG00000018937	HMOX2	heme oxygenase 2 [Source:VGNC Symbol;Acc:VGNC:29886]
-99.2036	ENSBTAG00000013873	MSX2	msh homeobox 2 [Source:VGNC Symbol;Acc:VGNC:31712]
-99.1991	ENSBTAG00000020244	EFNA1	ephrin A1 [Source:VGNC Symbol;Acc:VGNC:28355]
-99.196	ENSBTAG00000014541	PDGFA	platelet derived growth factor subunit A [Source:VGNC Symbol;Acc:VGNC:32689]
-99.1927	ENSBTAG00000002902	ANO6	anoctamin 6 [Source:VGNC Symbol;Acc:VGNC:25955]
-99.1872	ENSBTAG00000016167	ATL2	atlastin GTPase 2 [Source:VGNC Symbol;Acc:VGNC:26266]
-99.1845	ENSBTAG00000007467	MIB1	mindbomb E3 ubiquitin protein ligase 1 [Source:VGNC Symbol;Acc:VGNC:31455]
-99.1843	ENSBTAG00000011224	CITED2	Cbp/p300 interacting transactivator with Glu/Asp rich carboxy-terminal domain 2 [Source:VGNC Symbol;Acc:VGNC:27377]
-99.1832	ENSBTAG00000013721	PSMD10	proteasome 26S subunit, non-ATPase 10 [Source:NCBI gene (formerly Entrezgene);Acc:535414]
-99.1626	ENSBTAG00000011257	ASAH1	N-acylsphingosine amidohydrolase 1 [Source:VGNC Symbol;Acc:VGNC:26183]
-99.1566	ENSBTAG00000043546	ND6	NADH dehydrogenase subunit 6 [Source:NCBI gene (formerly Entrezgene);Acc:3283888]
-99.1132	ENSBTAG00000015575	TACR1	tachykinin receptor 1 [Source:VGNC Symbol;Acc:VGNC:35560]
-99.0761	ENSBTAG00000002066	MYL7	myosin light chain 7 [Source:VGNC Symbol;Acc:VGNC:31804]
-99.066	ENSBTAG00000039556	WIPI1	WD repeat domain, phosphoinositide interacting 1 [Source:VGNC Symbol;Acc:VGNC:36942]
-99.0614	ENSBTAG00000014599	LRRC66	leucine rich repeat containing 66 [Source:VGNC Symbol;Acc:VGNC:31024]
-99.0613	ENSBTAG00000008936	ABCC2	ATP binding cassette subfamily C member 2 [Source:VGNC Symbol;Acc:VGNC:25472]
-99.0593	ENSBTAG00000026428	ATP6V0C	ATPase H+ transporting V0 subunit c [Source:VGNC Symbol;Acc:VGNC:26311]
-99.0499	ENSBTAG00000019414	CLK4	CDC like kinase 4 [Source:VGNC Symbol;Acc:VGNC:27451]
-99.0417	ENSBTAG00000037651	S100A2	S100 calcium binding protein A2 [Source:VGNC Symbol;Acc:VGNC:34242]
-99.0309	ENSBTAG00000010293	PARD3B	par-3 family cell polarity regulator beta [Source:NCBI gene (formerly Entrezgene);Acc:535378]
-99.0297	ENSBTAG00000010992	CTSH	cathepsin H [Source:VGNC Symbol;Acc:VGNC:27816]
-99.0033	ENSBTAG00000043550	CYTB	cytochrome b [Source:NCBI gene (formerly Entrezgene);Acc:3283889]
-98.9888	ENSBTAG00000024269	TGFBR3	transforming growth factor beta receptor 3 [Source:VGNC Symbol;Acc:VGNC:49979]
-98.9751	ENSBTAG00000032304	ACY1	aminoacylase 1 [Source:NCBI gene (formerly Entrezgene);Acc:768058]
-98.9404	ENSBTAG00000000081	CERT1	ceramide transporter 1 [Source:VGNC Symbol;Acc:VGNC:27566]
-98.9325	ENSBTAG00000013422	GABRB3	gamma-aminobutyric acid type A receptor subunit beta3 [Source:VGNC Symbol;Acc:VGNC:29197]
-98.9285	ENSBTAG00000003403	PADI2	peptidyl arginine deiminase 2 [Source:VGNC Symbol;Acc:VGNC:32546]
-98.9008	ENSBTAG00000009023	TMTC3	transmembrane O-mannosyltransferase targeting cadherins 3 [Source:VGNC Symbol;Acc:VGNC:36147]
-98.8746	ENSBTAG00000004772	THEM4	thioesterase superfamily member 4 [Source:VGNC Symbol;Acc:VGNC:35833]
-98.8638	ENSBTAG00000020747	ASS1	argininosuccinate synthase 1 [Source:VGNC Symbol;Acc:VGNC:26224]
-98.8579	ENSBTAG00000048798	ENSBTAG00000048798	KIAA1109 ortholog [Source:NCBI gene (formerly Entrezgene);Acc:100297914]
-98.8543	ENSBTAG00000033096	PAG2	pregnancy-associated glycoprotein 2 [Source:NCBI gene (formerly Entrezgene);Acc:337897]
-98.8453	ENSBTAG00000015780	RCN2	reticulocalbin 2 [Source:VGNC Symbol;Acc:VGNC:33832]
-98.8314	ENSBTAG00000007115	GSR	glutathione-disulfide reductase [Source:VGNC Symbol;Acc:VGNC:29682]
-98.7823	ENSBTAG00000010798	SLC23A1	solute carrier family 23 member 1 [Source:VGNC Symbol;Acc:VGNC:34733]
-98.7515	ENSBTAG00000021830	ENPP1	ectonucleotide pyrophosphatase/phosphodiesterase 1 [Source:VGNC Symbol;Acc:VGNC:28504]
-98.7415	ENSBTAG00000011834	CCDC47	coiled-coil domain containing 47 [Source:VGNC Symbol;Acc:VGNC:97247]
-98.7386	ENSBTAG00000011785	WDR26	WD repeat domain 26 [Source:VGNC Symbol;Acc:VGNC:36889]
-98.7292	ENSBTAG00000016758	MLH1	mutL homolog 1 [Source:VGNC Symbol;Acc:VGNC:31497]
-98.7109	ENSBTAG00000053003	GPX4	glutathione peroxidase 4 [Source:NCBI gene (formerly Entrezgene);Acc:286809]
-98.6413	ENSBTAG00000002080	CCN3	cellular communication network factor 3 [Source:VGNC Symbol;Acc:VGNC:57785]
-98.6354	ENSBTAG00000009506	NAGA	alpha-N-acetylgalactosaminidase [Source:VGNC Symbol;Acc:VGNC:31867]
-98.6212	ENSBTAG00000009453	URGCP	upregulator of cell proliferation [Source:NCBI gene (formerly Entrezgene);Acc:504226]
-98.603	ENSBTAG00000007302	SLC2A5	solute carrier family 2 (facilitated glucose/fructose transporter), member 5 [Source:NCBI gene (formerly Entrezgene);Acc:282868]
-98.5882	ENSBTAG00000017243	GATA3	GATA binding protein 3 [Source:VGNC Symbol;Acc:VGNC:29267]
-98.5766	ENSBTAG00000001657	PICALM	phosphatidylinositol binding clathrin assembly protein [Source:VGNC Symbol;Acc:VGNC:32860]
-98.5413	ENSBTAG00000053029	ZNF26	zinc finger protein 26 [Source:HGNC Symbol;Acc:HGNC:13053]
-98.5372	ENSBTAG00000043584	ATP6	ATP synthase F0 subunit 6 [Source:NCBI gene (formerly Entrezgene);Acc:3283882]
-98.5368	ENSBTAG00000012066	PECAM1	platelet and endothelial cell adhesion molecule 1 [Source:VGNC Symbol;Acc:VGNC:32737]
-98.4984	ENSBTAG00000003111	ATM	ATM serine/threonine kinase [Source:VGNC Symbol;Acc:VGNC:26268]
-98.475	ENSBTAG00000014227	NDFIP2	Nedd4 family interacting protein 2 [Source:VGNC Symbol;Acc:VGNC:31935]
-98.4661	ENSBTAG00000013957	GALNT3	polypeptide N-acetylgalactosaminyltransferase 3 [Source:VGNC Symbol;Acc:VGNC:29232]
-98.4141	ENSBTAG00000014111	INPP4B	inositol polyphosphate-4-phosphatase type II B [Source:VGNC Symbol;Acc:VGNC:53908]
-98.4118	ENSBTAG00000054085	SELENOP	selenoprotein P [Source:NCBI gene (formerly Entrezgene);Acc:282066]
-98.3965	ENSBTAG00000018646	ATP6V1B2	ATPase H+ transporting V1 subunit B2 [Source:VGNC Symbol;Acc:VGNC:26318]
-98.3672	ENSBTAG00000010303	ICAM1	intercellular adhesion molecule 1 [Source:VGNC Symbol;Acc:VGNC:50197]
-98.3425	ENSBTAG00000002419	PIGM	phosphatidylinositol glycan anchor biosynthesis class M [Source:VGNC Symbol;Acc:VGNC:32872]
-98.2924	ENSBTAG00000020837	ARHGEF16	Rho guanine nucleotide exchange factor 16 [Source:VGNC Symbol;Acc:VGNC:26108]
-98.2579	ENSBTAG00000007933	DIPK2A	divergent protein kinase domain 2A [Source:VGNC Symbol;Acc:VGNC:52667]
-98.251	ENSBTAG00000055111	ENSBTAG00000055111
-98.2433	ENSBTAG00000023744	YPEL5	yippee like 5 [Source:VGNC Symbol;Acc:VGNC:37037]
-98.235	ENSBTAG00000050965	ENSBTAG00000050965
-98.2233	ENSBTAG00000019928	AQP11	aquaporin 11 [Source:VGNC Symbol;Acc:VGNC:26045]
-98.222	ENSBTAG00000039050	P2RY2	purinergic receptor P2Y2 [Source:VGNC Symbol;Acc:VGNC:32528]
-98.1969	ENSBTAG00000030499	ENSBTAG00000030499	diaphanous related formin 1 [Source:NCBI gene (formerly Entrezgene);Acc:786565]
-98.1908	ENSBTAG00000034940	TRIM64	tripartite motif containing 64 [Source:NCBI gene (formerly Entrezgene);Acc:521567]
-98.1765	ENSBTAG00000019954	ABHD2	abhydrolase domain containing 2, acylglycerol lipase [Source:VGNC Symbol;Acc:VGNC:25500]
-98.1596	ENSBTAG00000036102	ENSBTAG00000036102
-98.1475	ENSBTAG00000017680	NOS3	nitric oxide synthase 3 [Source:VGNC Symbol;Acc:VGNC:32174]
-98.1338	ENSBTAG00000012757	GCNT1	glucosaminyl (N-acetyl) transferase 1 [Source:VGNC Symbol;Acc:VGNC:56968]
-98.1285	ENSBTAG00000004440	SLC15A1	solute carrier family 15 member 1 [Source:VGNC Symbol;Acc:VGNC:34679]
-98.1043	ENSBTAG00000002783	PCYOX1	prenylcysteine oxidase 1 [Source:VGNC Symbol;Acc:VGNC:32650]
-98.0781	ENSBTAG00000019229	TMEM144	transmembrane protein 144 [Source:VGNC Symbol;Acc:VGNC:35976]
-98.0674	ENSBTAG00000034437	ENSBTAG00000034437	Bos taurus melanoma antigen family B, 2-like (LOC786836), mRNA. [Source:RefSeq mRNA;Acc:NM_001206775]
-98.047	ENSBTAG00000016320	LMO1	LIM domain only 1 [Source:VGNC Symbol;Acc:VGNC:30933]
-98.0444	ENSBTAG00000013294	DYRK3	dual specificity tyrosine phosphorylation regulated kinase 3 [Source:VGNC Symbol;Acc:VGNC:28281]
-98.0089	ENSBTAG00000010042	RIOK3	RIO kinase 3 [Source:VGNC Symbol;Acc:VGNC:49977]
-98.005	ENSBTAG00000009145	SLC7A4	solute carrier family 7 member 4 [Source:VGNC Symbol;Acc:VGNC:34930]
-97.9557	ENSBTAG00000016345	IL2RB	interleukin 2 receptor subunit beta [Source:VGNC Symbol;Acc:VGNC:30152]
-97.9542	ENSBTAG00000011726	CRYL1	crystallin lambda 1 [Source:VGNC Symbol;Acc:VGNC:27744]
-97.9322	ENSBTAG00000006355	SLC30A2	solute carrier family 30 member 2 [Source:VGNC Symbol;Acc:VGNC:34807]
-97.9319	ENSBTAG00000013031	TMEM62	transmembrane protein 62 [Source:VGNC Symbol;Acc:VGNC:36102]
-97.9185	ENSBTAG00000054516	ENSBTAG00000054516	steroid 17-alpha-hydroxylase/17,20 lyase [Source:NCBI gene (formerly Entrezgene);Acc:112444495]
-97.9096	ENSBTAG00000005674	NEU1	neuraminidase 1 [Source:VGNC Symbol;Acc:VGNC:50230]
-97.9007	ENSBTAG00000001607	TMEM41B	transmembrane protein 41B [Source:VGNC Symbol;Acc:VGNC:36086]
-97.8929	ENSBTAG00000051119	ENSBTAG00000051119
-97.8627	ENSBTAG00000020046	CLMP	CXADR like membrane protein [Source:VGNC Symbol;Acc:VGNC:50091]
-97.8586	ENSBTAG00000018077	LYPD3	LY6/PLAUR domain containing 3 [Source:VGNC Symbol;Acc:VGNC:31101]
-97.8429	ENSBTAG00000005481	ADAM10	ADAM metallopeptidase domain 10 [Source:VGNC Symbol;Acc:VGNC:25604]
-97.8247	ENSBTAG00000000421	EEA1	early endosome antigen 1 [Source:VGNC Symbol;Acc:VGNC:54421]
-97.8091	ENSBTAG00000011931	CD63	CD63 molecule [Source:NCBI gene (formerly Entrezgene);Acc:404156]
-97.7937	ENSBTAG00000010667	PIK3IP1	phosphoinositide-3-kinase interacting protein 1 [Source:VGNC Symbol;Acc:VGNC:32893]
-97.7785	ENSBTAG00000011779	MAL2	mal, T cell differentiation protein 2 [Source:VGNC Symbol;Acc:VGNC:54901]
-97.7536	ENSBTAG00000008966	TSPAN7	tetraspanin 7 [Source:NCBI gene (formerly Entrezgene);Acc:615596]
-97.7145	ENSBTAG00000013793	NEDD4	NEDD4 E3 ubiquitin protein ligase [Source:VGNC Symbol;Acc:VGNC:55128]
-97.7142	ENSBTAG00000006870	RASGEF1A	RasGEF domain family member 1A [Source:VGNC Symbol;Acc:VGNC:33743]
-97.6066	ENSBTAG00000000720	CTSL	cathepsin L [Source:NCBI gene (formerly Entrezgene);Acc:515200]
-97.6061	ENSBTAG00000021897	B4GALT3	beta-1,4-galactosyltransferase 3 [Source:VGNC Symbol;Acc:VGNC:26390]
-97.604	ENSBTAG00000002813	GAB1	GRB2 associated binding protein 1 [Source:VGNC Symbol;Acc:VGNC:29183]
-97.5681	ENSBTAG00000013148	CLDN1	claudin 1 [Source:VGNC Symbol;Acc:VGNC:27402]
-97.5542	ENSBTAG00000033313	SLC38A9	solute carrier family 38 member 9 [Source:VGNC Symbol;Acc:VGNC:34856]
-97.5375	ENSBTAG00000001535	LIPH	lipase H [Source:VGNC Symbol;Acc:VGNC:30905]
-97.5333	ENSBTAG00000001368	LGALS3BP	galectin 3 binding protein [Source:VGNC Symbol;Acc:VGNC:30853]
-97.5054	ENSBTAG00000008897	BIN2	bridging integrator 2 [Source:VGNC Symbol;Acc:VGNC:26498]
-97.5047	ENSBTAG00000013153	NF2	neurofibromin 2 [Source:VGNC Symbol;Acc:VGNC:32026]
-97.4042	ENSBTAG00000032914	SLC11A2	solute carrier family 11 member 2 [Source:NCBI gene (formerly Entrezgene);Acc:521189]
-97.3919	ENSBTAG00000017258	ACSL3	acyl-CoA synthetase long chain family member 3 [Source:VGNC Symbol;Acc:VGNC:25565]
-97.3721	ENSBTAG00000008683	LDHA	lactate dehydrogenase A [Source:NCBI gene (formerly Entrezgene);Acc:281274]
-97.3702	ENSBTAG00000003068	MSMO1	methylsterol monooxygenase 1 [Source:VGNC Symbol;Acc:VGNC:31701]
-97.3143	ENSBTAG00000020266	SLC19A2	solute carrier family 19 member 2 [Source:VGNC Symbol;Acc:VGNC:34710]
-97.3015	ENSBTAG00000007296	ENSBTAG00000007296
-97.2938	ENSBTAG00000016650	TIGAR	TP53 induced glycolysis regulatory phosphatase [Source:VGNC Symbol;Acc:VGNC:35863]
-97.2774	ENSBTAG00000010357	ST6GAL1	ST6 beta-galactoside alpha-2,6-sialyltransferase 1 [Source:VGNC Symbol;Acc:VGNC:35337]
-97.2567	ENSBTAG00000012117	ATP6AP1	ATPase H+ transporting accessory protein 1 [Source:VGNC Symbol;Acc:VGNC:26306]
-97.252	ENSBTAG00000004922	AGPAT5	1-acylglycerol-3-phosphate O-acyltransferase 5 [Source:VGNC Symbol;Acc:VGNC:25738]
-97.197	ENSBTAG00000021587	SMPDL3A	sphingomyelin phosphodiesterase acid like 3A [Source:VGNC Symbol;Acc:VGNC:35033]
-97.1895	ENSBTAG00000009050	ADIPOR2	adiponectin receptor 2 [Source:VGNC Symbol;Acc:VGNC:25679]
-97.1872	ENSBTAG00000011382	SLC9A3R1	SLC9A3 regulator 1 [Source:VGNC Symbol;Acc:VGNC:34941]
-97.1472	ENSBTAG00000007181	KIFC3	kinesin family member C3 [Source:VGNC Symbol;Acc:VGNC:30613]
-97.1379	ENSBTAG00000011634	ACP3	acid phosphatase 3 [Source:VGNC Symbol;Acc:VGNC:52603]
-97.0911	ENSBTAG00000010105	SLC35G1	solute carrier family 35 member G1 [Source:VGNC Symbol;Acc:VGNC:55969]
-97.0863	ENSBTAG00000004019	PMEL	premelanosome protein [Source:VGNC Symbol;Acc:VGNC:33069]
-97.0771	ENSBTAG00000016221	AMOT	angiomotin [Source:VGNC Symbol;Acc:VGNC:25870]
-97.0528	ENSBTAG00000007438	STT3B	STT3 oligosaccharyltransferase complex catalytic subunit B [Source:VGNC Symbol;Acc:VGNC:35428]
-97.0502	ENSBTAG00000000454	TMEM106C	transmembrane protein 106C [Source:VGNC Symbol;Acc:VGNC:35946]
-97.0166	ENSBTAG00000012605	GPR157	G protein-coupled receptor 157 [Source:VGNC Symbol;Acc:VGNC:29563]
-97.0123	ENSBTAG00000017457	STK10	serine/threonine kinase 10 [Source:VGNC Symbol;Acc:VGNC:35384]
-96.9938	ENSBTAG00000003109	ITM2B	integral membrane protein 2B [Source:VGNC Symbol;Acc:VGNC:30340]
-96.9825	ENSBTAG00000006777	TLCD1	TLC domain containing 1 [Source:VGNC Symbol;Acc:VGNC:35887]
-96.9619	ENSBTAG00000008449	ENSBTAG00000008449	dynein axonemal heavy chain 14 [Source:NCBI gene (formerly Entrezgene);Acc:516576]
-96.9089	ENSBTAG00000010801	CMBL	carboxymethylenebutenolidase homolog [Source:VGNC Symbol;Acc:VGNC:27477]
-96.8829	ENSBTAG00000016073	UGCG	UDP-glucose ceramide glucosyltransferase [Source:VGNC Symbol;Acc:VGNC:36647]
-96.8756	ENSBTAG00000018966	PLCE1	phospholipase C epsilon 1 [Source:VGNC Symbol;Acc:VGNC:32987]
-96.8604	ENSBTAG00000008013	LRRC2	leucine rich repeat containing 2 [Source:VGNC Symbol;Acc:VGNC:59173]
-96.8572	ENSBTAG00000005738	ATP8B1	ATPase phospholipid transporting 8B1 [Source:VGNC Symbol;Acc:VGNC:26330]
-96.7461	ENSBTAG00000010956	SCARB2	scavenger receptor class B member 2 [Source:VGNC Symbol;Acc:VGNC:34325]
-96.7072	ENSBTAG00000010437	MKLN1	muskelin 1 [Source:VGNC Symbol;Acc:VGNC:31490]
-96.6764	ENSBTAG00000048049	ENSBTAG00000048049
-96.6212	ENSBTAG00000006307	HSD17B11	hydroxysteroid 17-beta dehydrogenase 11 [Source:VGNC Symbol;Acc:VGNC:29970]
-96.5544	ENSBTAG00000053027	IFNT2	interferon tau [Source:NCBI gene (formerly Entrezgene);Acc:317698]
-96.5156	ENSBTAG00000005412	NEDD4L	NEDD4 like E3 ubiquitin protein ligase [Source:VGNC Symbol;Acc:VGNC:31983]
-96.4903	ENSBTAG00000013099	ALDOC	aldolase, fructose-bisphosphate C [Source:VGNC Symbol;Acc:VGNC:25823]
-96.4756	ENSBTAG00000052734	PAPOLB	poly(A) polymerase beta [Source:NCBI gene (formerly Entrezgene);Acc:100140898]
-96.469	ENSBTAG00000010897	RESP18	regulated endocrine specific protein 18 [Source:VGNC Symbol;Acc:VGNC:33875]
-96.435	ENSBTAG00000048782	ENSBTAG00000048782
-96.4198	ENSBTAG00000033326	DPEP1	dipeptidase 1 [Source:VGNC Symbol;Acc:VGNC:49143]
-96.4065	ENSBTAG00000019592	MBD5	methyl-CpG binding domain protein 5 [Source:VGNC Symbol;Acc:VGNC:31277]
-96.4035	ENSBTAG00000025442	HSPA1L	heat shock 70kDa protein 1-like [Source:NCBI gene (formerly Entrezgene);Acc:540190]
-96.3772	ENSBTAG00000049832	ENSBTAG00000049832
-96.3591	ENSBTAG00000031707	FRMD6	FERM domain containing 6 [Source:VGNC Symbol;Acc:VGNC:29117]
-96.3557	ENSBTAG00000002703	ATP6V1A	ATPase H+ transporting V1 subunit A [Source:VGNC Symbol;Acc:VGNC:26316]
-96.3538	ENSBTAG00000012246	ANO2	anoctamin 2 [Source:VGNC Symbol;Acc:VGNC:25951]
-96.3426	ENSBTAG00000013204	ATP13A3	ATPase 13A3 [Source:VGNC Symbol;Acc:VGNC:26279]
-96.314	ENSBTAG00000000161	TMEM40	transmembrane protein 40 [Source:VGNC Symbol;Acc:VGNC:36084]
-96.3013	ENSBTAG00000017465	GNS	glucosamine (N-acetyl)-6-sulfatase [Source:VGNC Symbol;Acc:VGNC:56204]
-96.2522	ENSBTAG00000047876	SH3TC1	SH3 domain and tetratricopeptide repeats 1 [Source:VGNC Symbol;Acc:VGNC:34582]
-96.1743	ENSBTAG00000017164	LARP4	La ribonucleoprotein 4 [Source:VGNC Symbol;Acc:VGNC:55059]
-96.1563	ENSBTAG00000038107	MAPKAPK2	MAPK activated protein kinase 2 [Source:VGNC Symbol;Acc:VGNC:54449]
-96.1316	ENSBTAG00000014883	GABARAP	GABA type A receptor-associated protein [Source:VGNC Symbol;Acc:VGNC:29185]
-96.0432	ENSBTAG00000046628	LYZ3	lysozyme 3 [Source:NCBI gene (formerly Entrezgene);Acc:281289]
-95.9965	ENSBTAG00000006910	ASRGL1	asparaginase and isoaspartyl peptidase 1 [Source:VGNC Symbol;Acc:VGNC:26223]
-95.9761	ENSBTAG00000008619	SAMD8	sterile alpha motif domain containing 8 [Source:VGNC Symbol;Acc:VGNC:34276]
-95.9344	ENSBTAG00000046750	B3GNT3	UDP-GlcNAc:betaGal beta-1,3-N-acetylglucosaminyltransferase 3 [Source:VGNC Symbol;Acc:VGNC:26379]
-95.894	ENSBTAG00000016442	MAP4K3	mitogen-activated protein kinase kinase kinase kinase 3 [Source:VGNC Symbol;Acc:VGNC:31206]
-95.8885	ENSBTAG00000002068	TAGLN2	transgelin 2 [Source:VGNC Symbol;Acc:VGNC:35586]
-95.859	ENSBTAG00000006082	DNASE2	deoxyribonuclease 2, lysosomal [Source:VGNC Symbol;Acc:VGNC:28136]
-95.8279	ENSBTAG00000021377	S100A14	S100 calcium binding protein A14 [Source:VGNC Symbol;Acc:VGNC:34240]
-95.7854	ENSBTAG00000009995	CPEB4	cytoplasmic polyadenylation element binding protein 4 [Source:VGNC Symbol;Acc:VGNC:27650]
-95.7673	ENSBTAG00000009470	CLIC4	chloride intracellular channel 4 [Source:VGNC Symbol;Acc:VGNC:27442]
-95.7606	ENSBTAG00000008158	CCDC68	coiled-coil domain containing 68 [Source:VGNC Symbol;Acc:VGNC:26910]
-95.7289	ENSBTAG00000014149	LCN2	lipocalin 2 [Source:VGNC Symbol;Acc:VGNC:30814]
-95.6901	ENSBTAG00000005765	SYNGR1	synaptogyrin 1 [Source:VGNC Symbol;Acc:VGNC:35524]
-95.6616	ENSBTAG00000046172	ENSBTAG00000046172	quinone oxidoreductase-like protein 2 [Source:NCBI gene (formerly Entrezgene);Acc:100299281]
-95.66	ENSBTAG00000031544	DDIT3	DNA damage inducible transcript 3 [Source:VGNC Symbol;Acc:VGNC:27947]
-95.6474	ENSBTAG00000050661	IFNT3	interferon tau-3 [Source:NCBI gene (formerly Entrezgene);Acc:100313956]
-95.6116	ENSBTAG00000007963	KIDINS220	kinase D interacting substrate 220 [Source:VGNC Symbol;Acc:VGNC:30579]
-95.5102	ENSBTAG00000020390	ARL13A	ADP ribosylation factor like GTPase 13A [Source:VGNC Symbol;Acc:VGNC:59320]
-95.4891	ENSBTAG00000002472	CASP9	caspase 9 [Source:NCBI gene (formerly Entrezgene);Acc:100140945]
-95.4002	ENSBTAG00000003358	MCFD2	multiple coagulation factor deficiency 2, ER cargo receptor complex subunit [Source:VGNC Symbol;Acc:VGNC:31304]
-95.3261	ENSBTAG00000032961	IER3IP1	immediate early response 3 interacting protein 1 [Source:NCBI gene (formerly Entrezgene);Acc:768079]
-95.3209	ENSBTAG00000012418	MED23	mediator complex subunit 23 [Source:VGNC Symbol;Acc:VGNC:31360]
-95.318	ENSBTAG00000010270	ENSBTAG00000010270	acyl-CoA thioesterase 4-like [Source:NCBI gene (formerly Entrezgene);Acc:512541]
-95.174	ENSBTAG00000018761	SLC35F6	solute carrier family 35 member F6 [Source:VGNC Symbol;Acc:VGNC:34836]
-95.1722	ENSBTAG00000055052	ENSBTAG00000055052
-95.1525	ENSBTAG00000004989	IRF5	interferon regulatory factor 5 [Source:VGNC Symbol;Acc:VGNC:30276]
-95.1229	ENSBTAG00000010153	ANXA3	annexin A3 [Source:VGNC Symbol;Acc:VGNC:25965]
-95.1158	ENSBTAG00000006367	CCN2	cellular communication network factor 2 [Source:VGNC Symbol;Acc:VGNC:27794]
-95.104	ENSBTAG00000054322	ENSBTAG00000054322	zinc finger protein 665 [Source:NCBI gene (formerly Entrezgene);Acc:100299712]
-95.0856	ENSBTAG00000054774	ENSBTAG00000054774
-95.0031	ENSBTAG00000021254	CENPI	centromere protein I [Source:VGNC Symbol;Acc:VGNC:27178]
-94.9857	ENSBTAG00000016236	SLC12A6	solute carrier family 12 member 6 [Source:VGNC Symbol;Acc:VGNC:34669]
-94.9295	ENSBTAG00000016649	CCND2	cyclin D2 [Source:VGNC Symbol;Acc:VGNC:26963]
-94.882	ENSBTAG00000053316	ENSBTAG00000053316
-94.8817	ENSBTAG00000020399	RNF139	ring finger protein 139 [Source:VGNC Symbol;Acc:VGNC:34023]
-94.8802	ENSBTAG00000053398	KNL1	kinetochore scaffold 1 [Source:NCBI gene (formerly Entrezgene);Acc:787969]
-94.7849	ENSBTAG00000000668	SLC22A5	solute carrier family 22 member 5 [Source:VGNC Symbol;Acc:VGNC:34730]
-94.7826	ENSBTAG00000001507	CLCN5	chloride voltage-gated channel 5 [Source:VGNC Symbol;Acc:VGNC:27399]
-94.7695	ENSBTAG00000018201	TKFC	triokinase and FMN cyclase [Source:VGNC Symbol;Acc:VGNC:56287]
-94.6925	ENSBTAG00000010220	DCLRE1C	DNA cross-link repair 1C [Source:VGNC Symbol;Acc:VGNC:56182]
-94.6656	ENSBTAG00000005280	ADA	adenosine deaminase [Source:VGNC Symbol;Acc:VGNC:25600]
-94.6202	ENSBTAG00000038323	GLYAT	glycine-N-acyltransferase [Source:NCBI gene (formerly Entrezgene);Acc:281787]
-94.507	ENSBTAG00000055014	SH3BGRL2	SH3 domain binding glutamate rich protein like 2 [Source:NCBI gene (formerly Entrezgene);Acc:785404]
-94.4186	ENSBTAG00000000874	CAST	calpastatin [Source:VGNC Symbol;Acc:VGNC:26790]
-94.3583	ENSBTAG00000048985	ENSBTAG00000048985
-94.3543	ENSBTAG00000021082	TMEM125	transmembrane protein 125 [Source:VGNC Symbol;Acc:VGNC:35958]
-94.344	ENSBTAG00000034193	BCO2	beta-carotene oxygenase 2 [Source:VGNC Symbol;Acc:VGNC:26454]
-94.3121	ENSBTAG00000013406	CSRP2	cysteine and glycine rich protein 2 [Source:VGNC Symbol;Acc:VGNC:27774]
-94.3015	ENSBTAG00000016401	OPTN	optineurin [Source:VGNC Symbol;Acc:VGNC:32442]
-94.2978	ENSBTAG00000004281	ACSS1	acyl-CoA synthetase short chain family member 1 [Source:VGNC Symbol;Acc:VGNC:25570]
-94.2839	ENSBTAG00000008134	BDNF	brain derived neurotrophic factor [Source:VGNC Symbol;Acc:VGNC:26461]
-94.2668	ENSBTAG00000010785	FAS	Fas cell surface death receptor [Source:VGNC Symbol;Acc:VGNC:28869]
-94.2206	ENSBTAG00000004246	H6PD	splA/ryanodine receptor domain and SOCS box containing 1 [Source:NCBI gene (formerly Entrezgene);Acc:504407]
-94.1751	ENSBTAG00000003610	DENND1A	DENN domain containing 1A [Source:VGNC Symbol;Acc:VGNC:27993]
-94.1311	ENSBTAG00000030434	FUCA1	alpha-L-fucosidase 1 [Source:VGNC Symbol;Acc:VGNC:29140]
-94.1281	ENSBTAG00000016900	TRAPPC13	trafficking protein particle complex 13 [Source:VGNC Symbol;Acc:VGNC:53304]
-94.0907	ENSBTAG00000040518	ENSBTAG00000040518	tubulin alpha-1C chain-like [Source:NCBI gene (formerly Entrezgene);Acc:112443216]
-94.0701	ENSBTAG00000001977	YIPF6	Yip1 domain family member 6 [Source:VGNC Symbol;Acc:VGNC:37028]
-94.0473	ENSBTAG00000054521	ENSBTAG00000054521
-94.025	ENSBTAG00000001619	SERINC5	serine incorporator 5 [Source:VGNC Symbol;Acc:VGNC:34463]
-94.0231	ENSBTAG00000020481	GXYLT2	glucoside xylosyltransferase 2 [Source:VGNC Symbol;Acc:VGNC:29727]
-93.9917	ENSBTAG00000018481	ENSBTAG00000018481	major allergen Equ c 1 [Source:NCBI gene (formerly Entrezgene);Acc:513329]
-93.9255	ENSBTAG00000016053	ARSA	arylsulfatase A [Source:VGNC Symbol;Acc:VGNC:50217]
-93.9015	ENSBTAG00000043564	ATP8	ATP synthase F0 subunit 8 [Source:NCBI gene (formerly Entrezgene);Acc:3283881]
-93.8407	ENSBTAG00000006078	ENSBTAG00000006078	interleukin 15 receptor subunit alpha [Source:NCBI gene (formerly Entrezgene);Acc:615030]
-93.7899	ENSBTAG00000040078	FLVCR2	feline leukemia virus subgroup C cellular receptor family, member 2 [Source:NCBI gene (formerly Entrezgene);Acc:507318]
-93.6774	ENSBTAG00000021771	PTTG1IP	PTTG1 interacting protein [Source:VGNC Symbol;Acc:VGNC:33565]
-93.6359	ENSBTAG00000019365	BACE1	beta-secretase 1 [Source:VGNC Symbol;Acc:VGNC:26400]
-93.6332	ENSBTAG00000012363	ENSBTAG00000012363	alkaline phosphatase-like [Source:NCBI gene (formerly Entrezgene);Acc:100125266]
-93.6269	ENSBTAG00000019305	EXOG	exo/endonuclease G [Source:VGNC Symbol;Acc:VGNC:28654]
-93.623	ENSBTAG00000021410	C1GALT1C1	C1GALT1 specific chaperone 1 [Source:NCBI gene (formerly Entrezgene);Acc:531644]
-93.5485	ENSBTAG00000030175	FBF1	Fas binding factor 1 [Source:VGNC Symbol;Acc:VGNC:55830]
-93.498	ENSBTAG00000008541	MGST1	microsomal glutathione S-transferase 1 [Source:VGNC Symbol;Acc:VGNC:31451]
-93.4662	ENSBTAG00000020829	PTPRK	protein tyrosine phosphatase receptor type K [Source:VGNC Symbol;Acc:VGNC:33552]
-93.4406	ENSBTAG00000014529	GBP4	guanylate binding protein 4 [Source:NCBI gene (formerly Entrezgene);Acc:613313]
-93.3224	ENSBTAG00000017363	SAT1	spermidine/spermine N1-acetyltransferase 1 [Source:VGNC Symbol;Acc:VGNC:34296]
-93.3135	ENSBTAG00000004394	PKIB	cAMP-dependent protein kinase inhibitor beta [Source:VGNC Symbol;Acc:VGNC:32941]
-93.1844	ENSBTAG00000015337	TSPAN12	tetraspanin 12 [Source:VGNC Symbol;Acc:VGNC:36427]
-93.1718	ENSBTAG00000003692	UCP2	uncoupling protein 2 [Source:VGNC Symbol;Acc:VGNC:36641]
-93.1477	ENSBTAG00000039591	TMEM167A	transmembrane protein 167A [Source:VGNC Symbol;Acc:VGNC:35991]
-93.0974	ENSBTAG00000027337	CTSA	cathepsin A [Source:VGNC Symbol;Acc:VGNC:27812]
-93.012	ENSBTAG00000043577	ND4	NADH dehydrogenase subunit 4 [Source:NCBI gene (formerly Entrezgene);Acc:3283886]
-92.9178	ENSBTAG00000004263	ATP6V0A4	ATPase H+ transporting V0 subunit a4 [Source:VGNC Symbol;Acc:VGNC:26309]
-92.8081	ENSBTAG00000043558	ND1	NADH dehydrogenase subunit 1 [Source:NCBI gene (formerly Entrezgene);Acc:3283877]
-92.803	ENSBTAG00000007253	TSPAN33	tetraspanin 33 [Source:VGNC Symbol;Acc:VGNC:36438]
-92.7839	ENSBTAG00000012902	ARL8B	ADP ribosylation factor like GTPase 8B [Source:VGNC Symbol;Acc:VGNC:26154]
-92.735	ENSBTAG00000048549	IFNT	Bos taurus interferon-tau 3g (IFNT), mRNA. [Source:RefSeq mRNA;Acc:NM_001168279]
-92.7239	ENSBTAG00000053324	ENSBTAG00000053324
-92.7228	ENSBTAG00000016152	DAB2	DAB adaptor protein 2 [Source:VGNC Symbol;Acc:VGNC:27865]
-92.6312	ENSBTAG00000012185	CLEC4E	C-type lectin domain family 4 member E [Source:VGNC Symbol;Acc:VGNC:27432]
-92.5816	ENSBTAG00000017077	CTSV	cathepsin V [Source:NCBI gene (formerly Entrezgene);Acc:281108]
-92.5565	ENSBTAG00000048059	TMEM86A	transmembrane protein 86A [Source:VGNC Symbol;Acc:VGNC:36116]
-92.4809	ENSBTAG00000053935	ENSBTAG00000053935
-92.3671	ENSBTAG00000001788	PDPN	podoplanin [Source:VGNC Symbol;Acc:VGNC:50142]
-92.2887	ENSBTAG00000009849	PLAC8A	placenta specific 8 A [Source:VGNC Symbol;Acc:VGNC:96878]
-92.1892	ENSBTAG00000001545	SLC34A2	solute carrier family 34 member 2 [Source:VGNC Symbol;Acc:VGNC:34818]
-92.1845	ENSBTAG00000006769	HSD3B1	hydroxy-delta-5-steroid dehydrogenase, 3 beta- and steroid delta-isomerase 1 [Source:NCBI gene (formerly Entrezgene);Acc:281824]
-92.1113	ENSBTAG00000012508	OSGIN1	oxidative stress induced growth inhibitor 1 [Source:VGNC Symbol;Acc:VGNC:32472]
-92.1012	ENSBTAG00000050602	HAS3	hyaluronan synthase 3 [Source:NCBI gene (formerly Entrezgene);Acc:286824]
-92.0633	ENSBTAG00000004555	LRP2	LDL receptor related protein 2 [Source:VGNC Symbol;Acc:VGNC:30990]
-92.0159	ENSBTAG00000021779	MGST2	microsomal glutathione S-transferase 2 [Source:VGNC Symbol;Acc:VGNC:31452]
-91.9952	ENSBTAG00000000458	DYNC1LI2	dynein cytoplasmic 1 light intermediate chain 2 [Source:VGNC Symbol;Acc:VGNC:28273]
-91.9775	ENSBTAG00000046047	ENSBTAG00000046047	zinc finger protein 75D-like [Source:NCBI gene (formerly Entrezgene);Acc:100851913]
-91.9543	ENSBTAG00000039823	KBTBD7	kelch repeat and BTB domain containing 7 [Source:VGNC Symbol;Acc:VGNC:53820]
-91.9348	ENSBTAG00000004266	DDX25	DEAD-box helicase 25 [Source:VGNC Symbol;Acc:VGNC:27961]
-91.9029	ENSBTAG00000005989	LAP3	leucine aminopeptidase 3 [Source:VGNC Symbol;Acc:VGNC:30786]
-91.8351	ENSBTAG00000016751	MYO6	myosin VI [Source:VGNC Symbol;Acc:VGNC:31829]
-91.789	ENSBTAG00000008734	PM20D1	peptidase M20 domain containing 1 [Source:VGNC Symbol;Acc:VGNC:33066]
-91.7644	ENSBTAG00000021636	GPR155	G protein-coupled receptor 155 [Source:VGNC Symbol;Acc:VGNC:29561]
-91.7513	ENSBTAG00000008584	CLN8	CLN8 transmembrane ER and ERGIC protein [Source:NCBI gene (formerly Entrezgene);Acc:530874]
-91.7489	ENSBTAG00000011149	SIGIRR	single Ig and TIR domain containing [Source:VGNC Symbol;Acc:VGNC:34616]
-91.6688	ENSBTAG00000023007	ENSBTAG00000023007	sodium/glucose cotransporter 1-like [Source:NCBI gene (formerly Entrezgene);Acc:531152]
-91.6034	ENSBTAG00000052892	ENSBTAG00000052892
-91.5644	ENSBTAG00000007022	ENSBTAG00000007022
-91.5621	ENSBTAG00000008756	ELF3	E74 like ETS transcription factor 3 [Source:VGNC Symbol;Acc:VGNC:28428]
-91.4868	ENSBTAG00000004999	RESF1	retroelement silencing factor 1 [Source:VGNC Symbol;Acc:VGNC:30572]
-91.4571	ENSBTAG00000010909	SLC30A1	solute carrier family 30 member 1 [Source:VGNC Symbol;Acc:VGNC:34805]
-91.393	ENSBTAG00000021829	GM2A	GM2 ganglioside activator [Source:VGNC Symbol;Acc:VGNC:29431]
-91.3723	ENSBTAG00000000284	NAALAD2	N-acetylated alpha-linked acidic dipeptidase 2 [Source:VGNC Symbol;Acc:VGNC:31855]
-91.3448	ENSBTAG00000008143	STK17A	serine/threonine kinase 17a [Source:VGNC Symbol;Acc:VGNC:53673]
-91.2632	ENSBTAG00000006607	CCNG1	cyclin G1 [Source:VGNC Symbol;Acc:VGNC:26969]
-91.2311	ENSBTAG00000021708	CEP128	centrosomal protein 128 [Source:VGNC Symbol;Acc:VGNC:53080]
-91.2218	ENSBTAG00000016748	ENSBTAG00000016748	intestinal alkaline phosphatase VII [Source:NCBI gene (formerly Entrezgene);Acc:516378]
-91.1989	ENSBTAG00000013798	PTPRN	protein tyrosine phosphatase receptor type N [Source:VGNC Symbol;Acc:VGNC:33554]
-91.1423	ENSBTAG00000002015	RPS6KA6	ribosomal protein S6 kinase A6 [Source:VGNC Symbol;Acc:VGNC:34145]
-91.1077	ENSBTAG00000044070	SNX30	sorting nexin family member 30 [Source:VGNC Symbol;Acc:VGNC:35108]
-91.0964	ENSBTAG00000001517	KRT18	keratin 18 [Source:VGNC Symbol;Acc:VGNC:30719]
-91.0788	ENSBTAG00000015978	ANXA1	annexin A1 [Source:VGNC Symbol;Acc:VGNC:50196]
-91.0783	ENSBTAG00000046548	ST6GALNAC4	ST6 N-acetylgalactosaminide alpha-2,6-sialyltransferase 4 [Source:VGNC Symbol;Acc:VGNC:58614]
-91.0279	ENSBTAG00000009615	ANXA2	annexin A2 [Source:NCBI gene (formerly Entrezgene);Acc:282689]
-90.9771	ENSBTAG00000021334	C24H18orf32	chromosome 24 C18orf32 homolog [Source:VGNC Symbol;Acc:VGNC:52682]
-90.8078	ENSBTAG00000053086	PHLDA3	pleckstrin homology like domain family A member 3 [Source:NCBI gene (formerly Entrezgene);Acc:112441889]
-90.7456	ENSBTAG00000026172	LRATD2	LRAT domain containing 2 [Source:VGNC Symbol;Acc:VGNC:28841]
-90.7447	ENSBTAG00000016663	PIGN	phosphatidylinositol glycan anchor biosynthesis class N [Source:VGNC Symbol;Acc:VGNC:32873]
-90.7212	ENSBTAG00000021721	CDSN	corneodesmosin [Source:VGNC Symbol;Acc:VGNC:27157]
-90.5644	ENSBTAG00000018823	GRN	granulin precursor [Source:VGNC Symbol;Acc:VGNC:29663]
-90.511	ENSBTAG00000014807	DPP8	dipeptidyl peptidase 8 [Source:VGNC Symbol;Acc:VGNC:28189]
-90.4341	ENSBTAG00000018784	CTSZ	cathepsin Z [Source:VGNC Symbol;Acc:VGNC:27820]
-90.4156	ENSBTAG00000002245	MRGPRX2	MAS related GPR family member X2 [Source:NCBI gene (formerly Entrezgene);Acc:516646]
-90.4076	ENSBTAG00000039105	S100A3	S100 calcium binding protein A3 [Source:VGNC Symbol;Acc:VGNC:34243]
-90.1477	ENSBTAG00000014486	ATP12A	ATPase H+/K+ transporting non-gastric alpha2 subunit [Source:VGNC Symbol;Acc:VGNC:26276]
-90.1153	ENSBTAG00000011075	PLPBP	pyridoxal phosphate binding protein [Source:VGNC Symbol;Acc:VGNC:33043]
-90.0796	ENSBTAG00000017866	CD36	CD36 molecule [Source:NCBI gene (formerly Entrezgene);Acc:281052]
-90.0679	ENSBTAG00000016805	SGMS2	sphingomyelin synthase 2 [Source:VGNC Symbol;Acc:VGNC:34544]
-90.0625	ENSBTAG00000004381	TACSTD2	tumor associated calcium signal transducer 2 [Source:VGNC Symbol;Acc:VGNC:35563]
-90.0355	ENSBTAG00000012904	EDEM1	ER degradation enhancing alpha-mannosidase like protein 1 [Source:VGNC Symbol;Acc:VGNC:28322]
-90.0091	ENSBTAG00000050482	ZNF148	zinc finger protein 148 [Source:NCBI gene (formerly Entrezgene);Acc:613265]
-89.9043	ENSBTAG00000038079	C16H1orf21	chromosome 16 C1orf21 homolog [Source:NCBI gene (formerly Entrezgene);Acc:781721]
-89.803	ENSBTAG00000047330	FABP5	fatty acid binding protein 5 [Source:NCBI gene (formerly Entrezgene);Acc:281760]
-89.7523	ENSBTAG00000012671	TNIP1	TNFAIP3 interacting protein 1 [Source:VGNC Symbol;Acc:VGNC:36180]
-89.5837	ENSBTAG00000011700	PLLP	plasmolipin [Source:VGNC Symbol;Acc:VGNC:33037]
-89.4996	ENSBTAG00000051295	FXYD4	FXYD domain containing ion transport regulator 4 [Source:NCBI gene (formerly Entrezgene);Acc:100295639]
-89.4841	ENSBTAG00000017850	ARHGEF6	Rac/Cdc42 guanine nucleotide exchange factor 6 [Source:VGNC Symbol;Acc:VGNC:26120]
-89.4589	ENSBTAG00000005592	MCOLN1	mucolipin 1 [Source:VGNC Symbol;Acc:VGNC:31318]
-89.3196	ENSBTAG00000054911	ANO9	anoctamin 9 [Source:NCBI gene (formerly Entrezgene);Acc:107131193]
-89.3005	ENSBTAG00000021896	NUP214	nucleoporin 214 [Source:VGNC Symbol;Acc:VGNC:32358]
-89.129	ENSBTAG00000017287	DRAM1	DNA damage regulated autophagy modulator 1 [Source:VGNC Symbol;Acc:VGNC:28201]
-89.0372	ENSBTAG00000045805	ENSBTAG00000045805	uncharacterized LOC100196902 [Source:NCBI gene (formerly Entrezgene);Acc:100196902]
-88.9563	ENSBTAG00000015133	CCR7	C-C motif chemokine receptor 7 [Source:VGNC Symbol;Acc:VGNC:26987]
-88.8864	ENSBTAG00000043960	MTHFD2L	methylenetetrahydrofolate dehydrogenase (NADP+ dependent) 2 like [Source:NCBI gene (formerly Entrezgene);Acc:536269]
-88.8497	ENSBTAG00000014335	ENSBTAG00000014335	steroid 17-alpha-hydroxylase/17,20 lyase [Source:NCBI gene (formerly Entrezgene);Acc:112441470]
-88.8031	ENSBTAG00000015426	PDLIM4	PDZ and LIM domain 4 [Source:VGNC Symbol;Acc:VGNC:32710]
-88.796	ENSBTAG00000009851	ROBO1	roundabout guidance receptor 1 [Source:VGNC Symbol;Acc:VGNC:34078]
-88.6915	ENSBTAG00000010662	LIMK2	LIM domain kinase 2 [Source:VGNC Symbol;Acc:VGNC:52793]
-88.5613	ENSBTAG00000033345	STAR	steroidogenic acute regulatory protein [Source:VGNC Symbol;Acc:VGNC:35360]
-88.4094	ENSBTAG00000000341	ISOC1	isochorismatase domain containing 1 [Source:VGNC Symbol;Acc:VGNC:30301]
-88.3232	ENSBTAG00000006581	CCDC82	coiled-coil domain containing 82 [Source:VGNC Symbol;Acc:VGNC:26920]
-88.2995	ENSBTAG00000019552	PGRMC1	progesterone receptor membrane component 1 [Source:VGNC Symbol;Acc:VGNC:32801]
-88.2969	ENSBTAG00000000011	TDH	L-threonine dehydrogenase [Source:NCBI gene (formerly Entrezgene);Acc:511957]
-88.2325	ENSBTAG00000003405	TP53I3	tumor protein p53 inducible protein 3 [Source:VGNC Symbol;Acc:VGNC:36235]
-88.2068	ENSBTAG00000001219	ENSBTAG00000001219
-88.2032	ENSBTAG00000019707	GATA2	GATA binding protein 2 [Source:VGNC Symbol;Acc:VGNC:29266]
-88.1471	ENSBTAG00000051534	GNMT	glycine N-methyltransferase [Source:NCBI gene (formerly Entrezgene);Acc:538212]
-88.1249	ENSBTAG00000055252	UBE2E1	ubiquitin conjugating enzyme E2 E1 [Source:NCBI gene (formerly Entrezgene);Acc:615599]
-88.0487	ENSBTAG00000016711	PPIF	peptidylprolyl isomerase F [Source:VGNC Symbol;Acc:VGNC:33198]
-87.9691	ENSBTAG00000016973	PRSS8	serine protease 8 [Source:VGNC Symbol;Acc:VGNC:33426]
-87.9523	ENSBTAG00000017812	ALS2CL	ALS2 C-terminal like [Source:VGNC Symbol;Acc:VGNC:25852]
-87.9457	ENSBTAG00000017094	SHMT1	serine hydroxymethyltransferase 1 [Source:VGNC Symbol;Acc:VGNC:34603]
-87.9091	ENSBTAG00000016315	COTL1	coactosin like F-actin binding protein 1 [Source:VGNC Symbol;Acc:VGNC:27626]
-87.8885	ENSBTAG00000004540	NUB1	negative regulator of ubiquitin like proteins 1 [Source:VGNC Symbol;Acc:VGNC:32314]
-87.8687	ENSBTAG00000021879	VCL	vinculin [Source:VGNC Symbol;Acc:VGNC:36779]
-87.7876	ENSBTAG00000036262	GBE1	1,4-alpha-glucan branching enzyme 1 [Source:VGNC Symbol;Acc:VGNC:53570]
-87.7313	ENSBTAG00000037728	PAGE4	PAGE family member 4 [Source:VGNC Symbol;Acc:VGNC:50182]
-87.5989	ENSBTAG00000020582	PRSS22	serine protease 22 [Source:VGNC Symbol;Acc:VGNC:33415]
-87.5757	ENSBTAG00000013863	DUSP1	dual specificity phosphatase 1 [Source:VGNC Symbol;Acc:VGNC:28248]
-87.502	ENSBTAG00000044053	SLC17A5	solute carrier family 17 member 5 [Source:VGNC Symbol;Acc:VGNC:34700]
-87.4841	ENSBTAG00000009770	GPD2	glycerol-3-phosphate dehydrogenase 2 [Source:VGNC Symbol;Acc:VGNC:29531]
-87.4232	ENSBTAG00000018260	MFSD11	major facilitator superfamily domain containing 11 [Source:VGNC Symbol;Acc:VGNC:31433]
-87.4183	ENSBTAG00000007840	HMGCR	3-hydroxy-3-methylglutaryl-CoA reductase [Source:VGNC Symbol;Acc:VGNC:29879]
-87.414	ENSBTAG00000003608	SYCP2	synaptonemal complex protein 2 [Source:VGNC Symbol;Acc:VGNC:35509]
-87.3242	ENSBTAG00000020739	NXT2	nuclear transport factor 2 like export factor 2 [Source:VGNC Symbol;Acc:VGNC:32385]
-87.2174	ENSBTAG00000018186	PDXK	pyridoxal kinase [Source:VGNC Symbol;Acc:VGNC:50243]
-87.2162	ENSBTAG00000017104	MUC1	mucin 1, cell surface associated [Source:VGNC Symbol;Acc:VGNC:59186]
-87.1152	ENSBTAG00000017721	EEF1AKNMT	eEF1A lysine and N-terminal methyltransferase [Source:VGNC Symbol;Acc:VGNC:31403]
-87.0946	ENSBTAG00000027991	ANAPC1	anaphase promoting complex subunit 1 [Source:VGNC Symbol;Acc:VGNC:25879]
-86.9664	ENSBTAG00000000836	KRT8	keratin 8 [Source:VGNC Symbol;Acc:VGNC:50407]
-86.7553	ENSBTAG00000009197	ENSBTAG00000009197
-86.7247	ENSBTAG00000022813	TMEM150B	transmembrane protein 150B [Source:VGNC Symbol;Acc:VGNC:35981]
-86.6908	ENSBTAG00000010399	TXNDC16	thioredoxin domain containing 16 [Source:VGNC Symbol;Acc:VGNC:36537]
-86.6752	ENSBTAG00000015076	LATS1	large tumor suppressor kinase 1 [Source:VGNC Symbol;Acc:VGNC:30800]
-86.5488	ENSBTAG00000038375	STOM	stomatin [Source:VGNC Symbol;Acc:VGNC:35409]
-86.3367	ENSBTAG00000016708	CLTC	clathrin heavy chain [Source:VGNC Symbol;Acc:VGNC:27471]
-86.2389	ENSBTAG00000015249	B4GALT1	beta-1,4-galactosyltransferase 1 [Source:VGNC Symbol;Acc:VGNC:26388]
-86.1981	ENSBTAG00000045901	CLDN6	claudin 6 [Source:VGNC Symbol;Acc:VGNC:27418]
-86.0627	ENSBTAG00000001819	CDX2	caudal type homeobox 2 [Source:NCBI gene (formerly Entrezgene);Acc:618679]
-85.9001	ENSBTAG00000006471	OSBPL11	oxysterol binding protein like 11 [Source:VGNC Symbol;Acc:VGNC:32459]
-85.8584	ENSBTAG00000002651	PKP2	plakophilin 2 [Source:VGNC Symbol;Acc:VGNC:32950]
-85.8456	ENSBTAG00000019256	GLA	galactosidase alpha [Source:VGNC Symbol;Acc:VGNC:29390]
-85.7829	ENSBTAG00000032719	TFRC	transferrin receptor [Source:VGNC Symbol;Acc:VGNC:35797]
-85.7074	ENSBTAG00000012838	RDH12	retinol dehydrogenase 12 [Source:VGNC Symbol;Acc:VGNC:52816]
-85.6261	ENSBTAG00000019453	PTGES	prostaglandin E synthase [Source:VGNC Symbol;Acc:VGNC:33505]
-85.5817	ENSBTAG00000013298	PLA2G4A	phospholipase A2 group IVA [Source:VGNC Symbol;Acc:VGNC:32960]
-85.5769	ENSBTAG00000011256	MYO1B	myosin IB [Source:VGNC Symbol;Acc:VGNC:31817]
-85.4918	ENSBTAG00000053990	ENSBTAG00000053990
-85.4341	ENSBTAG00000000842	UBASH3B	ubiquitin associated and SH3 domain containing B [Source:VGNC Symbol;Acc:VGNC:36575]
-85.3644	ENSBTAG00000002326	LGALS3	galectin 3 [Source:VGNC Symbol;Acc:VGNC:30852]
-85.2868	ENSBTAG00000009279	TNKS2	tankyrase 2 [Source:VGNC Symbol;Acc:VGNC:36186]
-85.2807	ENSBTAG00000046083	ZNF280A	zinc finger protein 280A [Source:NCBI gene (formerly Entrezgene);Acc:518200]
-85.157	ENSBTAG00000049315	ENSBTAG00000049315
-85.1106	ENSBTAG00000011636	DDIAS	DNA damage induced apoptosis suppressor [Source:VGNC Symbol;Acc:VGNC:27946]
-85.0994	ENSBTAG00000015511	FADS3	fatty acid desaturase 3 [Source:VGNC Symbol;Acc:VGNC:28703]
-85.0725	ENSBTAG00000024787	HAUS3	HAUS augmin like complex subunit 3 [Source:VGNC Symbol;Acc:VGNC:29759]
-85.0016	ENSBTAG00000002490	CHPT1	choline phosphotransferase 1 [Source:VGNC Symbol;Acc:VGNC:27314]
-84.9923	ENSBTAG00000001881	SLC10A1	solute carrier family 10 member 1 [Source:VGNC Symbol;Acc:VGNC:34659]
-84.9418	ENSBTAG00000032642	GSTA3	glutathione S-transferase, alpha 3 [Source:NCBI gene (formerly Entrezgene);Acc:768055]
-84.8649	ENSBTAG00000003144	KIAA0825	KIAA0825 [Source:VGNC Symbol;Acc:VGNC:30556]
-84.8146	ENSBTAG00000020261	CDH26	cadherin 26 [Source:VGNC Symbol;Acc:VGNC:27102]
-84.6483	ENSBTAG00000001424	MSH6	mutS homolog 6 [Source:VGNC Symbol;Acc:VGNC:31696]
-84.5917	ENSBTAG00000014324	ANTXR2	ANTXR cell adhesion molecule 2 [Source:VGNC Symbol;Acc:VGNC:25962]
-84.5563	ENSBTAG00000019097	CNTNAP1	contactin associated protein 1 [Source:VGNC Symbol;Acc:VGNC:27540]
-84.5161	ENSBTAG00000037756	TET1	tet methylcytosine dioxygenase 1 [Source:VGNC Symbol;Acc:VGNC:55994]
-84.3977	ENSBTAG00000015554	TMF1	TATA element modulatory factor 1 [Source:VGNC Symbol;Acc:VGNC:36132]
-84.3544	ENSBTAG00000021226	SAR1B	secretion associated Ras related GTPase 1B [Source:VGNC Symbol;Acc:VGNC:34287]
-84.1579	ENSBTAG00000038617	SH3D21	SH3 domain containing 21 [Source:VGNC Symbol;Acc:VGNC:34571]
-84.1314	ENSBTAG00000043981	SBF2	SET binding factor 2 [Source:VGNC Symbol;Acc:VGNC:34306]
-84.0149	ENSBTAG00000016058	FAM83B	family with sequence similarity 83 member B [Source:VGNC Symbol;Acc:VGNC:28833]
-84.0132	ENSBTAG00000000105	RIT1	Ras like without CAAX 1 [Source:VGNC Symbol;Acc:VGNC:33987]
-83.9912	ENSBTAG00000000532	EXO5	exonuclease 5 [Source:VGNC Symbol;Acc:VGNC:59180]
-83.8554	ENSBTAG00000002883	RPTOR	regulatory associated protein of MTOR complex 1 [Source:VGNC Symbol;Acc:VGNC:34153]
-83.7973	ENSBTAG00000010152	MID1	midline 1 [Source:VGNC Symbol;Acc:VGNC:31464]
-83.7675	ENSBTAG00000007865	GNPDA1	glucosamine-6-phosphate deaminase 1 [Source:VGNC Symbol;Acc:VGNC:29476]
-83.7277	ENSBTAG00000001165	AIFM2	apoptosis inducing factor mitochondria associated 2 [Source:VGNC Symbol;Acc:VGNC:25762]
-83.6209	ENSBTAG00000007485	GRHL1	grainyhead like transcription factor 1 [Source:VGNC Symbol;Acc:VGNC:29634]
-83.5533	ENSBTAG00000021103	SLC35F5	solute carrier family 35 member F5 [Source:VGNC Symbol;Acc:VGNC:34835]
-83.5445	ENSBTAG00000007051	CLDN23	claudin 23 [Source:VGNC Symbol;Acc:VGNC:27412]
-83.4111	ENSBTAG00000040584	DSC2	desmocollin 2 [Source:VGNC Symbol;Acc:VGNC:28213]
-83.2021	ENSBTAG00000012280	PGLYRP2	peptidoglycan recognition protein 2 [Source:VGNC Symbol;Acc:VGNC:32792]
-83.1624	ENSBTAG00000032515	PLA2R1	phospholipase A2 receptor 1 [Source:VGNC Symbol;Acc:VGNC:32966]
-83.1614	ENSBTAG00000000203	ATP6V1G1	ATPase H+ transporting V1 subunit G1 [Source:VGNC Symbol;Acc:VGNC:26324]
-83.073	ENSBTAG00000009443	GCNT3	glucosaminyl (N-acetyl) transferase 3, mucin type [Source:NCBI gene (formerly Entrezgene);Acc:404167]
-82.9881	ENSBTAG00000049641	ENOX2	ecto-NOX disulfide-thiol exchanger 2 [Source:NCBI gene (formerly Entrezgene);Acc:100848511]
-82.8789	ENSBTAG00000034323	ENSBTAG00000034323	solute carrier family 2, facilitated glucose transporter member 5 [Source:NCBI gene (formerly Entrezgene);Acc:107131287]
-82.7776	ENSBTAG00000018280	SLC28A3	solute carrier family 28 member 3 [Source:VGNC Symbol;Acc:VGNC:34793]
-82.7024	ENSBTAG00000033221	CCDC152	coiled-coil domain containing 152 [Source:VGNC Symbol;Acc:VGNC:26857]
-82.591	ENSBTAG00000015177	PRSS23	serine protease 23 [Source:VGNC Symbol;Acc:VGNC:33416]
-82.5748	ENSBTAG00000018349	IFI30	IFI30 lysosomal thiol reductase [Source:VGNC Symbol;Acc:VGNC:30043]
-82.4395	ENSBTAG00000015630	RLIM	ring finger protein, LIM domain interacting [Source:VGNC Symbol;Acc:VGNC:56952]
-82.3859	ENSBTAG00000005090	CEMIP2	cell migration inducing hyaluronidase 2 [Source:VGNC Symbol;Acc:VGNC:36021]
-82.2887	ENSBTAG00000000245	NHSL1	NHS like 1 [Source:VGNC Symbol;Acc:VGNC:32072]
-82.1392	ENSBTAG00000000243	HEBP2	heme binding protein 2 [Source:VGNC Symbol;Acc:VGNC:29798]
-81.9283	ENSBTAG00000003568	CLDN10	claudin 10 [Source:VGNC Symbol;Acc:VGNC:27403]
-81.9203	ENSBTAG00000011876	MORC3	MORC family CW-type zinc finger 3 [Source:VGNC Symbol;Acc:VGNC:31556]
-81.4026	ENSBTAG00000023831	ELP4	elongator acetyltransferase complex subunit 4 [Source:VGNC Symbol;Acc:VGNC:28457]
-81.397	ENSBTAG00000014127	PTGS2	prostaglandin-endoperoxide synthase 2 [Source:VGNC Symbol;Acc:VGNC:33512]
-81.1241	ENSBTAG00000021287	SLC16A7	solute carrier family 16 member 7 [Source:VGNC Symbol;Acc:VGNC:34693]
-81.088	ENSBTAG00000048246	DPP4	dipeptidyl peptidase 4 [Source:NCBI gene (formerly Entrezgene);Acc:281122]
-80.9257	ENSBTAG00000020495	SH3YL1	SH3 and SYLF domain containing 1 [Source:VGNC Symbol;Acc:VGNC:34584]
-80.8622	ENSBTAG00000010661	DPYSL3	dihydropyrimidinase like 3 [Source:VGNC Symbol;Acc:VGNC:28196]
-80.7816	ENSBTAG00000047680	IRF7	interferon regulatory factor 7 [Source:VGNC Symbol;Acc:VGNC:30278]
-80.6084	ENSBTAG00000016444	RETREG1	reticulophagy regulator 1 [Source:VGNC Symbol;Acc:VGNC:33878]
-80.5661	ENSBTAG00000036101	KYAT1	kynurenine aminotransferase 1 [Source:NCBI gene (formerly Entrezgene);Acc:528582]
-80.3599	ENSBTAG00000001017	SLK	STE20 like kinase [Source:VGNC Symbol;Acc:VGNC:34968]
-80.2093	ENSBTAG00000016771	PLK2	polo like kinase 2 [Source:VGNC Symbol;Acc:VGNC:33034]
-80.0302	ENSBTAG00000020954	TRIM7	tripartite motif containing 7 [Source:VGNC Symbol;Acc:VGNC:36351]
-80.0256	ENSBTAG00000046588	DNAJB9	DnaJ heat shock protein family (Hsp40) member B9 [Source:NCBI gene (formerly Entrezgene);Acc:614588]
-79.9625	ENSBTAG00000053443	RUM1	syncytin-Rum1 [Source:NCBI gene (formerly Entrezgene);Acc:104973909]
-79.907	ENSBTAG00000002019	SERPINB5	serpin family B member 5 [Source:VGNC Symbol;Acc:VGNC:34473]
-79.8519	ENSBTAG00000008661	C15H11orf52	chromosome 15 C11orf52 homolog [Source:VGNC Symbol;Acc:VGNC:52631]
-79.7968	ENSBTAG00000051084	ENSBTAG00000051084
-79.6592	ENSBTAG00000018469	ALDH6A1	aldehyde dehydrogenase 6 family member A1 [Source:VGNC Symbol;Acc:VGNC:25817]
-79.637	ENSBTAG00000010118	HAT1	histone acetyltransferase 1 [Source:VGNC Symbol;Acc:VGNC:49063]
-79.6327	ENSBTAG00000002128	MPPE1	metallophosphoesterase 1 [Source:VGNC Symbol;Acc:VGNC:31587]
-79.4054	ENSBTAG00000015792	CFAP54	cilia and flagella associated protein 54 [Source:NCBI gene (formerly Entrezgene);Acc:787705]
-79.2743	ENSBTAG00000038755	ENSBTAG00000038755
-79.2615	ENSBTAG00000021766	HBEGF	heparin binding EGF like growth factor [Source:VGNC Symbol;Acc:VGNC:29765]
-79.2178	ENSBTAG00000002755	ANKRD12	ankyrin repeat domain 12 [Source:VGNC Symbol;Acc:VGNC:25911]
-78.9422	ENSBTAG00000018905	MAN2A2	mannosidase alpha class 2A member 2 [Source:VGNC Symbol;Acc:VGNC:31165]
-78.756	ENSBTAG00000027936	C3H1orf146	chromosome 3 C1orf146 homolog [Source:VGNC Symbol;Acc:VGNC:52708]
-78.6624	ENSBTAG00000011798	STK38L	serine/threonine kinase 38 like [Source:VGNC Symbol;Acc:VGNC:35400]
-78.6297	ENSBTAG00000013557	ERAP1	endoplasmic reticulum aminopeptidase 1 [Source:VGNC Symbol;Acc:VGNC:28560]
-78.5299	ENSBTAG00000000831	CTNS	cystinosin, lysosomal cystine transporter [Source:VGNC Symbol;Acc:VGNC:27807]
-78.4747	ENSBTAG00000001992	CYP51A1	cytochrome P450, family 51, subfamily A, polypeptide 1 [Source:NCBI gene (formerly Entrezgene);Acc:505060]
-78.4376	ENSBTAG00000011156	ATP8A1	ATPase phospholipid transporting 8A1 [Source:VGNC Symbol;Acc:VGNC:26329]
-78.395	ENSBTAG00000007353	DLX4	distal-less homeobox 4 [Source:VGNC Symbol;Acc:VGNC:28100]
-78.2395	ENSBTAG00000006161	MET	MET proto-oncogene, receptor tyrosine kinase [Source:VGNC Symbol;Acc:VGNC:31394]
-78.2315	ENSBTAG00000048623	ENSBTAG00000048623	melanoma-associated antigen 10 [Source:NCBI gene (formerly Entrezgene);Acc:617695]
-78.0875	ENSBTAG00000001592	INSIG1	insulin induced gene 1 [Source:VGNC Symbol;Acc:VGNC:30217]
-78.0745	ENSBTAG00000013316	BRPF3	bromodomain and PHD finger containing 3 [Source:VGNC Symbol;Acc:VGNC:26573]
-77.9526	ENSBTAG00000010812	P2RX4	purinergic receptor P2X 4 [Source:VGNC Symbol;Acc:VGNC:32520]
-77.949	ENSBTAG00000007512	PLA2G15	phospholipase A2 group XV [Source:VGNC Symbol;Acc:VGNC:32956]
-77.7728	ENSBTAG00000019062	FCHSD2	FCH and double SH3 domains 2 [Source:VGNC Symbol;Acc:VGNC:28937]
-77.7431	ENSBTAG00000047990	ENSBTAG00000047990	major allergen Equ c 1-like [Source:NCBI gene (formerly Entrezgene);Acc:783399]
-77.689	ENSBTAG00000018493	ERICH5	glutamate rich 5 [Source:VGNC Symbol;Acc:VGNC:28585]
-77.6207	ENSBTAG00000019125	SLC1A1	solute carrier family 1 member 1 [Source:VGNC Symbol;Acc:VGNC:34711]
-77.4568	ENSBTAG00000025788	MPV17L2	MPV17 mitochondrial inner membrane protein like 2 [Source:VGNC Symbol;Acc:VGNC:31590]
-77.4133	ENSBTAG00000004518	GRHL2	grainyhead like transcription factor 2 [Source:VGNC Symbol;Acc:VGNC:29635]
-77.404	ENSBTAG00000021182	DOCK4	dedicator of cytokinesis 4 [Source:VGNC Symbol;Acc:VGNC:28158]
-77.1866	ENSBTAG00000005947	PLAU	plasminogen activator, urokinase [Source:VGNC Symbol;Acc:VGNC:32975]
-77.1284	ENSBTAG00000005622	LITAF	lipopolysaccharide induced TNF factor [Source:VGNC Symbol;Acc:VGNC:30911]
-77.1079	ENSBTAG00000053171	ENSBTAG00000053171
-76.9503	ENSBTAG00000002355		natural resistance-associated macrophage protein 2-like [Source:NCBI gene (formerly Entrezgene);Acc:112441543]
-76.8248	ENSBTAG00000008800	XKR8	XK related 8 [Source:VGNC Symbol;Acc:VGNC:36990]
-76.7317	ENSBTAG00000050091	GCNT4	glucosaminyl (N-acetyl) transferase 4 [Source:NCBI gene (formerly Entrezgene);Acc:782825]
-76.5285	ENSBTAG00000018986	ACSL4	acyl-CoA synthetase long chain family member 4 [Source:VGNC Symbol;Acc:VGNC:25566]
-76.5063	ENSBTAG00000005828	MERTK	MER proto-oncogene, tyrosine kinase [Source:VGNC Symbol;Acc:VGNC:31391]
-76.4423	ENSBTAG00000010899	TIMP2	TIMP metallopeptidase inhibitor 2 [Source:VGNC Symbol;Acc:VGNC:35871]
-76.1504	ENSBTAG00000023429	PLS1	plastin 1 [Source:VGNC Symbol;Acc:VGNC:33051]
-76.1399	ENSBTAG00000047000	ENSBTAG00000047000
-75.6102	ENSBTAG00000021975	PATJ	PATJ crumbs cell polarity complex component [Source:VGNC Symbol;Acc:VGNC:32592]
-75.5117	ENSBTAG00000008403	ROCK1	Rho associated coiled-coil containing protein kinase 1 [Source:VGNC Symbol;Acc:VGNC:56371]
-75.4774	ENSBTAG00000017970	ZYX	zyxin [Source:VGNC Symbol;Acc:VGNC:37395]
-75.4642	ENSBTAG00000012863	GDPD2	glycerophosphodiester phosphodiesterase domain containing 2 [Source:VGNC Symbol;Acc:VGNC:29311]
-75.3432	ENSBTAG00000020233	CCDC186	coiled-coil domain containing 186 [Source:VGNC Symbol;Acc:VGNC:26881]
-75.2673	ENSBTAG00000013048	NIPAL3	NIPA like domain containing 3 [Source:VGNC Symbol;Acc:VGNC:32083]
-75.1314	ENSBTAG00000000576	ADGRG2	adhesion G protein-coupled receptor G2 [Source:VGNC Symbol;Acc:VGNC:25666]
-75.0327	ENSBTAG00000011197	IPMK	inositol polyphosphate multikinase [Source:VGNC Symbol;Acc:VGNC:30240]
-74.986	ENSBTAG00000020933	HCFC2	host cell factor C2 [Source:VGNC Symbol;Acc:VGNC:29773]
-74.9243	ENSBTAG00000018122	TKDP1	trophoblast Kunitz domain protein 1 [Source:NCBI gene (formerly Entrezgene);Acc:404076]
-74.7849	ENSBTAG00000006204	XPNPEP3	X-prolyl aminopeptidase 3 [Source:VGNC Symbol;Acc:VGNC:36996]
-74.77	ENSBTAG00000008435	DELE1	DAP3 binding cell death enhancer 1 [Source:VGNC Symbol;Acc:VGNC:50135]
-74.7348	ENSBTAG00000039346	ENSBTAG00000039346	intestinal-type alkaline phosphatase [Source:NCBI gene (formerly Entrezgene);Acc:528262]
-74.6765	ENSBTAG00000008816	TRIM2	tripartite motif containing 2 [Source:VGNC Symbol;Acc:VGNC:36318]
-74.5216	ENSBTAG00000020895	LOXL4	lysyl oxidase like 4 [Source:VGNC Symbol;Acc:VGNC:55958]
-74.4641	ENSBTAG00000019964	GAS6	growth arrest specific 6 [Source:VGNC Symbol;Acc:VGNC:29261]
-74.3215	ENSBTAG00000013244	HDAC6	histone deacetylase 6 [Source:VGNC Symbol;Acc:VGNC:50613]
-74.2843	ENSBTAG00000015089	LGALS1	galectin 1 [Source:VGNC Symbol;Acc:VGNC:30850]
-74.14	ENSBTAG00000008716	SSB	small RNA binding exonuclease protection factor La [Source:VGNC Symbol;Acc:VGNC:58554]
-74.1206	ENSBTAG00000017468	NUCB2	nucleobindin 2 [Source:VGNC Symbol;Acc:VGNC:32319]
-73.9731	ENSBTAG00000009996	DOT1L	DOT1 like histone lysine methyltransferase [Source:VGNC Symbol;Acc:VGNC:50607]
-73.9685	ENSBTAG00000050234	ZNF518B	zinc finger protein 518B [Source:NCBI gene (formerly Entrezgene);Acc:539006]
-73.9642	ENSBTAG00000014463	CAMK2D	calcium/calmodulin dependent protein kinase II delta [Source:VGNC Symbol;Acc:VGNC:53692]
-73.963	ENSBTAG00000012082	TNFRSF12A	TNF receptor superfamily member 12A [Source:VGNC Symbol;Acc:VGNC:36162]
-73.8897	ENSBTAG00000012054	ENSBTAG00000012054	aldehyde dehydrogenase family 3 member B1-like [Source:NCBI gene (formerly Entrezgene);Acc:508879]
-73.5959	ENSBTAG00000009231	NSDHL	NAD(P) dependent steroid dehydrogenase-like [Source:VGNC Symbol;Acc:VGNC:56932]
-73.5091	ENSBTAG00000022759	PAG11	pregnancy-associated glycoprotein 11 [Source:NCBI gene (formerly Entrezgene);Acc:337907]
-73.4344	ENSBTAG00000016550	MAEL	maelstrom spermatogenic transposon silencer [Source:VGNC Symbol;Acc:VGNC:31136]
-73.3346	ENSBTAG00000008958	NSMAF	neutral sphingomyelinase activation associated factor [Source:VGNC Symbol;Acc:VGNC:32278]
-73.3204	ENSBTAG00000033398	HKDC1	hexokinase domain containing 1 [Source:VGNC Symbol;Acc:VGNC:29867]
-73.2523	ENSBTAG00000016896	HERPUD1	homocysteine inducible ER protein with ubiquitin like domain 1 [Source:VGNC Symbol;Acc:VGNC:29816]
-73.2025	ENSBTAG00000005629	CRYBG2	crystallin beta-gamma domain containing 2 [Source:VGNC Symbol;Acc:VGNC:27740]
-73.1575	ENSBTAG00000007830	PLEKHM3	pleckstrin homology domain containing M3 [Source:VGNC Symbol;Acc:VGNC:54470]
-73.0863	ENSBTAG00000036099	ENSBTAG00000036099	kynurenine--oxoglutarate transaminase 1 [Source:NCBI gene (formerly Entrezgene);Acc:104968656]
-73.0588	ENSBTAG00000000804	MOB3B	MOB kinase activator 3B [Source:VGNC Symbol;Acc:VGNC:31545]
-72.9988	ENSBTAG00000015810	C15H11orf34	chromosome 15 open reading frame, human C11orf34 [Source:NCBI gene (formerly Entrezgene);Acc:505518]
-72.9041	ENSBTAG00000046533	RAB31	RAB31, member RAS oncogene family [Source:VGNC Symbol;Acc:VGNC:33640]
-72.8875	ENSBTAG00000039509	GPRC5A	G protein-coupled receptor class C group 5 member A [Source:VGNC Symbol;Acc:VGNC:29606]
-72.7019	ENSBTAG00000008940	NPTX1	neuronal pentraxin 1 [Source:VGNC Symbol;Acc:VGNC:32218]
-72.6138	ENSBTAG00000019448	CLDN7	claudin 7 [Source:VGNC Symbol;Acc:VGNC:55796]
-72.4266	ENSBTAG00000049434	ENSBTAG00000049434	monocarboxylate transporter 1 [Source:NCBI gene (formerly Entrezgene);Acc:509911]
-72.2107	ENSBTAG00000006287	NEDD9	neural precursor cell expressed, developmentally down-regulated 9 [Source:VGNC Symbol;Acc:VGNC:31984]
-72.1883	ENSBTAG00000007488	ZFP90	ZFP90 zinc finger protein [Source:VGNC Symbol;Acc:VGNC:37169]
-72.1288	ENSBTAG00000009512	EPS8L1	EPS8 like 1 [Source:VGNC Symbol;Acc:VGNC:28556]
-71.9482	ENSBTAG00000014724	EIF4A2	eukaryotic translation initiation factor 4A2 [Source:VGNC Symbol;Acc:VGNC:28405]
-71.8945	ENSBTAG00000020809	SLC36A2	solute carrier family 36 member 2 [Source:VGNC Symbol;Acc:VGNC:34839]
-71.7303	ENSBTAG00000020378	DLG1	discs large MAGUK scaffold protein 1 [Source:VGNC Symbol;Acc:VGNC:53531]
-71.6522	ENSBTAG00000011733	GIPC2	GIPC PDZ domain containing family member 2 [Source:VGNC Symbol;Acc:VGNC:29366]
-71.5931	ENSBTAG00000018446	GCA	grancalcin [Source:VGNC Symbol;Acc:VGNC:29278]
-71.2352	ENSBTAG00000017549	KITLG	KIT ligand [Source:VGNC Symbol;Acc:VGNC:30619]
-70.9025	ENSBTAG00000026936	ZGRF1	zinc finger GRF-type containing 1 [Source:NCBI gene (formerly Entrezgene);Acc:539572]
-70.5837	ENSBTAG00000004881	MTHFD2	methylenetetrahydrofolate dehydrogenase (NADP+ dependent) 2, methenyltetrahydrofolate cyclohydrolase [Source:NCBI gene (formerly Entrezgene);Acc:517539]
-70.1499	ENSBTAG00000019611	MAGI3	membrane associated guanylate kinase, WW and PDZ domain containing 3 [Source:VGNC Symbol;Acc:VGNC:31148]
-70.1245	ENSBTAG00000014960	SCHIP1	schwannomin interacting protein 1 [Source:NCBI gene (formerly Entrezgene);Acc:535716]
-70.0976	ENSBTAG00000015596	SLCO2B1	solute carrier organic anion transporter family member 2B1 [Source:VGNC Symbol;Acc:VGNC:34952]

## Sheet: dimension1_positively
Axis1	Gene stable ID	Gene name	Gene description
100	ENSBTAG00000019901	RAD54L	RAD54 like [Source:VGNC Symbol;Acc:VGNC:49567]
100	ENSBTAG00000016588	PGAP6	post-glycosylphosphatidylinositol attachment to proteins 6 [Source:VGNC Symbol;Acc:VGNC:36123]
99.9999	ENSBTAG00000004118	ALAS1	5'-aminolevulinate synthase 1 [Source:VGNC Symbol;Acc:VGNC:25803]
99.9994	ENSBTAG00000005461	SOX15	SRY-box transcription factor 15 [Source:VGNC Symbol;Acc:VGNC:35143]
99.9993	ENSBTAG00000008611	IGFBP4	insulin like growth factor binding protein 4 [Source:VGNC Symbol;Acc:VGNC:30086]
99.9989	ENSBTAG00000014784	NT5DC2	5'-nucleotidase domain containing 2 [Source:VGNC Symbol;Acc:VGNC:32295]
99.9955	ENSBTAG00000044158	LDLRAD3	low density lipoprotein receptor class A domain containing 3 [Source:VGNC Symbol;Acc:VGNC:30828]
99.9894	ENSBTAG00000022635	LAMB2	laminin, beta 2 (laminin S) [Source:NCBI gene (formerly Entrezgene);Acc:520167]
99.9886	ENSBTAG00000007728	PES1	pescadillo ribosomal biogenesis factor 1 [Source:VGNC Symbol;Acc:VGNC:32750]
99.9821	ENSBTAG00000015101	HMGB2	high mobility group box 2 [Source:NCBI gene (formerly Entrezgene);Acc:540444]
99.9691	ENSBTAG00000014328	MGC138914	uncharacterized LOC512219 [Source:NCBI gene (formerly Entrezgene);Acc:512219]
99.9583	ENSBTAG00000001537	TSKU	tsukushi, small leucine rich proteoglycan [Source:VGNC Symbol;Acc:VGNC:54896]
99.9517	ENSBTAG00000015368	SEPTIN4	septin 4 [Source:VGNC Symbol;Acc:VGNC:34456]
99.95	ENSBTAG00000017631	GFER	growth factor, augmenter of liver regeneration [Source:VGNC Symbol;Acc:VGNC:29324]
99.9439	ENSBTAG00000015704	TMCO3	transmembrane and coiled-coil domains 3 [Source:VGNC Symbol;Acc:VGNC:35930]
99.9406	ENSBTAG00000010106	CCND3	cyclin D3 [Source:VGNC Symbol;Acc:VGNC:26964]
99.9363	ENSBTAG00000046699	STAT4	signal transducer and activator of transcription 4 [Source:NCBI gene (formerly Entrezgene);Acc:515988]
99.9322	ENSBTAG00000008148	GCM1	glial cells missing transcription factor 1 [Source:VGNC Symbol;Acc:VGNC:29291]
99.931	ENSBTAG00000024822	SETX	senataxin [Source:VGNC Symbol;Acc:VGNC:34501]
99.9282	ENSBTAG00000012284	CLCN2	chloride voltage-gated channel 2 [Source:VGNC Symbol;Acc:VGNC:27396]
99.9272	ENSBTAG00000002215	GFPT2	glutamine-fructose-6-phosphate transaminase 2 [Source:VGNC Symbol;Acc:VGNC:29331]
99.9225	ENSBTAG00000009586	CDC25A	cell division cycle 25A [Source:VGNC Symbol;Acc:VGNC:27062]
99.9214	ENSBTAG00000005718	PLIN2	perilipin 2 [Source:VGNC Symbol;Acc:VGNC:33030]
99.918	ENSBTAG00000011969	HSPB1	heat shock protein family B (small) member 1 [Source:NCBI gene (formerly Entrezgene);Acc:516099]
99.9135	ENSBTAG00000002089	FAM217A	family with sequence similarity 217 member A [Source:VGNC Symbol;Acc:VGNC:53967]
99.9121	ENSBTAG00000012197	AP5Z1	adaptor related protein complex 5 subunit zeta 1 [Source:VGNC Symbol;Acc:VGNC:25998]
99.8733	ENSBTAG00000019948	AFAP1L1	actin filament associated protein 1 like 1 [Source:VGNC Symbol;Acc:VGNC:25707]
99.8573	ENSBTAG00000005729	FBXL4	F-box and leucine rich repeat protein 4 [Source:VGNC Symbol;Acc:VGNC:59171]
99.8464	ENSBTAG00000008436	CDC25B	cell division cycle 25B [Source:VGNC Symbol;Acc:VGNC:27063]
99.8449	ENSBTAG00000002090	CPSF4	cleavage and polyadenylation specific factor 4 [Source:VGNC Symbol;Acc:VGNC:27673]
99.8434	ENSBTAG00000016197	PHLDB1	pleckstrin homology like domain family B member 1 [Source:VGNC Symbol;Acc:VGNC:32837]
99.8412	ENSBTAG00000019340	PCDH9	protocadherin 9 [Source:HGNC Symbol;Acc:HGNC:8661]
99.8406	ENSBTAG00000017225	RNF135	ring finger protein 135 [Source:VGNC Symbol;Acc:VGNC:57150]
99.8397	ENSBTAG00000015595	MCM5	minichromosome maintenance complex component 5 [Source:VGNC Symbol;Acc:VGNC:31311]
99.8349	ENSBTAG00000015834	ARHGEF4	Rho guanine nucleotide exchange factor 4 [Source:VGNC Symbol;Acc:VGNC:55325]
99.8324	ENSBTAG00000014733	NOP2	NOP2 nucleolar protein [Source:VGNC Symbol;Acc:VGNC:32167]
99.8295	ENSBTAG00000040053	MYH6	myosin heavy chain 6 [Source:VGNC Symbol;Acc:VGNC:55126]
99.8187	ENSBTAG00000012761	PTK7	protein tyrosine kinase 7 (inactive) [Source:VGNC Symbol;Acc:VGNC:54670]
99.8066	ENSBTAG00000019704	HLTF	helicase like transcription factor [Source:VGNC Symbol;Acc:VGNC:50276]
99.7987	ENSBTAG00000018530	TUBA8	tubulin alpha 8 [Source:VGNC Symbol;Acc:VGNC:36504]
99.7924	ENSBTAG00000015961	TSPAN2	tetraspanin 2 [Source:VGNC Symbol;Acc:VGNC:36435]
99.765	ENSBTAG00000020414	DHX37	DEAH-box helicase 37 [Source:VGNC Symbol;Acc:VGNC:28055]
99.7488	ENSBTAG00000012723	HAUS4	HAUS augmin like complex subunit 4 [Source:NCBI gene (formerly Entrezgene);Acc:614307]
99.7468	ENSBTAG00000016908	METTL1	methyltransferase like 1 [Source:VGNC Symbol;Acc:VGNC:31400]
99.7412	ENSBTAG00000050135	TRIM4	tripartite motif containing 4 [Source:NCBI gene (formerly Entrezgene);Acc:527577]
99.7377	ENSBTAG00000054406	C18H19orf33	chromosome 18 C19orf33 homolog [Source:NCBI gene (formerly Entrezgene);Acc:787634]
99.7277	ENSBTAG00000006589	CFTR	CF transmembrane conductance regulator [Source:VGNC Symbol;Acc:VGNC:50053]
99.7032	ENSBTAG00000000160	CBS	cystathionine beta-synthase [Source:NCBI gene (formerly Entrezgene);Acc:514525]
99.692	ENSBTAG00000013338	SLC7A9	solute carrier family 7 member 9 [Source:VGNC Symbol;Acc:VGNC:34934]
99.6898	ENSBTAG00000003935	TMBIM1	transmembrane BAX inhibitor motif containing 1 [Source:VGNC Symbol;Acc:VGNC:35915]
99.6713	ENSBTAG00000001568	PPIC	peptidylprolyl isomerase C [Source:VGNC Symbol;Acc:VGNC:33196]
99.661	ENSBTAG00000005835	PYCR2	pyrroline-5-carboxylate reductase 2 [Source:NCBI gene (formerly Entrezgene);Acc:504987]
99.6498	ENSBTAG00000006084	PINK1	PTEN induced kinase 1 [Source:VGNC Symbol;Acc:VGNC:32904]
99.6339	ENSBTAG00000017278	ACBD5	acyl-CoA binding domain containing 5 [Source:VGNC Symbol;Acc:VGNC:25532]
99.6331	ENSBTAG00000001225	RBM14	RNA binding motif protein 14 [Source:VGNC Symbol;Acc:VGNC:56277]
99.6301	ENSBTAG00000004066	PARP8	poly(ADP-ribose) polymerase family member 8 [Source:NCBI gene (formerly Entrezgene);Acc:511595]
99.6285	ENSBTAG00000004063	SERPINA5	serpin family A member 5 [Source:VGNC Symbol;Acc:VGNC:53954]
99.6135	ENSBTAG00000019094	NLE1	notchless homolog 1 [Source:VGNC Symbol;Acc:VGNC:32109]
99.6109	ENSBTAG00000002187	SERINC3	serine incorporator 3 [Source:VGNC Symbol;Acc:VGNC:34462]
99.5626	ENSBTAG00000001918	STXBP5L	syntaxin binding protein 5 like [Source:VGNC Symbol;Acc:VGNC:35449]
99.5586	ENSBTAG00000014788	AKAP12	A-kinase anchoring protein 12 [Source:VGNC Symbol;Acc:VGNC:25782]
99.5524	ENSBTAG00000002704	POMT2	protein O-mannosyltransferase 2 [Source:VGNC Symbol;Acc:VGNC:33159]
99.5479	ENSBTAG00000030629	MGC127133	20-beta-hydroxysteroid dehydrogenase-like [Source:NCBI gene (formerly Entrezgene);Acc:510180]
99.5309	ENSBTAG00000021395	PSME1	proteasome activator subunit 1 [Source:VGNC Symbol;Acc:VGNC:33473]
99.4926	ENSBTAG00000000843	NDRG2	NDRG family member 2 [Source:VGNC Symbol;Acc:VGNC:50007]
99.4465	ENSBTAG00000031231	IRF1	interferon regulatory factor 1 [Source:VGNC Symbol;Acc:VGNC:30270]
99.4011	ENSBTAG00000014611	SORL1	sortilin related receptor 1 [Source:VGNC Symbol;Acc:VGNC:35132]
99.3901	ENSBTAG00000004494	B4GALNT1	beta-1,4-N-acetyl-galactosaminyltransferase 1 [Source:VGNC Symbol;Acc:VGNC:26385]
99.3805	ENSBTAG00000008583	PALD1	phosphatase domain containing paladin 1 [Source:VGNC Symbol;Acc:VGNC:50088]
99.3542	ENSBTAG00000023472	PPP1R14A	protein phosphatase 1 regulatory inhibitor subunit 14A [Source:VGNC Symbol;Acc:VGNC:33226]
99.3276	ENSBTAG00000013358	RPS23	ribosomal protein S23 [Source:NCBI gene (formerly Entrezgene);Acc:540129]
99.3222	ENSBTAG00000003820	GRAMD1A	GRAM domain containing 1A [Source:VGNC Symbol;Acc:VGNC:29622]
99.3147	ENSBTAG00000008300	FN1	fibronectin 1 [Source:VGNC Symbol;Acc:VGNC:29056]
99.2945	ENSBTAG00000000411	HGS	hepatocyte growth factor-regulated tyrosine kinase substrate [Source:VGNC Symbol;Acc:VGNC:29836]
99.2831	ENSBTAG00000004492	SWT1	SWT1 RNA endoribonuclease homolog [Source:VGNC Symbol;Acc:VGNC:35501]
99.2658	ENSBTAG00000013113	VDAC1	voltage dependent anion channel 1 [Source:VGNC Symbol;Acc:VGNC:36782]
99.254	ENSBTAG00000008938	SRC	SRC proto-oncogene, non-receptor tyrosine kinase [Source:VGNC Symbol;Acc:VGNC:35269]
99.2471	ENSBTAG00000008142	IFIH1	interferon induced with helicase C domain 1 [Source:VGNC Symbol;Acc:VGNC:30048]
99.2382	ENSBTAG00000013528	CHMP7	charged multivesicular body protein 7 [Source:VGNC Symbol;Acc:VGNC:27306]
99.2329	ENSBTAG00000015655	APBB1	amyloid beta precursor protein binding family B member 1 [Source:VGNC Symbol;Acc:VGNC:26003]
99.2207	ENSBTAG00000020366	TBL3	transducin beta like 3 [Source:VGNC Symbol;Acc:VGNC:35659]
99.2175	ENSBTAG00000020654	BAZ2B	bromodomain adjacent to zinc finger domain 2B [Source:VGNC Symbol;Acc:VGNC:55328]
99.2069	ENSBTAG00000005186	DBNDD2	dysbindin domain containing 2 [Source:VGNC Symbol;Acc:VGNC:27892]
99.1826	ENSBTAG00000021523	STAT3	signal transducer and activator of transcription 3 [Source:VGNC Symbol;Acc:VGNC:35371]
99.1761	ENSBTAG00000007195	GUCA2A	guanylate cyclase activator 2A [Source:VGNC Symbol;Acc:VGNC:29716]
99.1678	ENSBTAG00000007105	ENSBTAG00000007105	PWP2 small subunit processome component [Source:NCBI gene (formerly Entrezgene);Acc:514336]
99.1383	ENSBTAG00000011647	SLC25A15	solute carrier family 25 member 15 [Source:VGNC Symbol;Acc:VGNC:54486]
99.1256	ENSBTAG00000018474	IL6R	interleukin 6 receptor [Source:VGNC Symbol;Acc:VGNC:30167]
99.0549	ENSBTAG00000011656	PRPF6	pre-mRNA processing factor 6 [Source:VGNC Symbol;Acc:VGNC:33382]
99.0377	ENSBTAG00000025564	RPL36AL	ribosomal protein L36a like [Source:NCBI gene (formerly Entrezgene);Acc:613592]
99.0144	ENSBTAG00000013631	GLUL	glutamate-ammonia ligase [Source:VGNC Symbol;Acc:VGNC:29426]
98.9985	ENSBTAG00000016208	TGM2	transglutaminase 2 [Source:VGNC Symbol;Acc:VGNC:35810]
98.9815	ENSBTAG00000050846	ENSBTAG00000050846	interleukin 32 [Source:NCBI gene (formerly Entrezgene);Acc:505800]
98.9581	ENSBTAG00000014093	IDH2	isocitrate dehydrogenase (NADP(+)) 2 [Source:VGNC Symbol;Acc:VGNC:53941]
98.9521	ENSBTAG00000010389	STBD1	starch binding domain 1 [Source:VGNC Symbol;Acc:VGNC:35376]
98.9106	ENSBTAG00000014517	KLB	klotho beta [Source:VGNC Symbol;Acc:VGNC:30622]
98.9029	ENSBTAG00000014512	WDR19	WD repeat domain 19 [Source:VGNC Symbol;Acc:VGNC:36886]
98.8206	ENSBTAG00000013393	GEMIN4	gem nuclear organelle associated protein 4 [Source:VGNC Symbol;Acc:VGNC:29317]
98.8205	ENSBTAG00000014001	MAP1A	microtubule associated protein 1A [Source:VGNC Symbol;Acc:VGNC:31177]
98.7932	ENSBTAG00000020795	RPS21	ribosomal protein S21 [Source:VGNC Symbol;Acc:VGNC:34134]
98.7913	ENSBTAG00000005654	TMSB10	thymosin beta 10 [Source:NCBI gene (formerly Entrezgene);Acc:282385]
98.7827	ENSBTAG00000001777	RPLP2	ribosomal protein lateral stalk subunit P2 [Source:VGNC Symbol;Acc:VGNC:34119]
98.7814	ENSBTAG00000012344	RPL26	ribosomal protein L26 [Source:NCBI gene (formerly Entrezgene);Acc:337890]
98.6962	ENSBTAG00000011658	PTPN18	protein tyrosine phosphatase non-receptor type 18 [Source:VGNC Symbol;Acc:VGNC:33533]
98.6745	ENSBTAG00000017584	PLCG1	phospholipase C gamma 1 [Source:VGNC Symbol;Acc:VGNC:32988]
98.6419	ENSBTAG00000000460	SYTL2	synaptotagmin like 2 [Source:NCBI gene (formerly Entrezgene);Acc:614406]
98.641	ENSBTAG00000013411	ENO1	enolase 1 [Source:VGNC Symbol;Acc:VGNC:97268]
98.6067	ENSBTAG00000016042	TM6SF2	transmembrane 6 superfamily member 2 [Source:VGNC Symbol;Acc:VGNC:35909]
98.5999	ENSBTAG00000022150	MXRA5	matrix remodeling associated 5 [Source:VGNC Symbol;Acc:VGNC:31774]
98.5975	ENSBTAG00000030166	BTBD17	BTB domain containing 17 [Source:VGNC Symbol;Acc:VGNC:26587]
98.5874	ENSBTAG00000013768	NPSR1	neuropeptide S receptor 1 [Source:VGNC Symbol;Acc:VGNC:32216]
98.5649	ENSBTAG00000010543	FGFR4	fibroblast growth factor receptor 4 [Source:VGNC Symbol;Acc:VGNC:28988]
98.5648	ENSBTAG00000013265	DHX38	DEAH-box helicase 38 [Source:VGNC Symbol;Acc:VGNC:57044]
98.5493	ENSBTAG00000012678	COLGALT1	collagen beta(1-O)galactosyltransferase 1 [Source:VGNC Symbol;Acc:VGNC:53572]
98.5384	ENSBTAG00000021013	TUBB4A	tubulin beta 4A class IVa [Source:VGNC Symbol;Acc:VGNC:36507]
98.5364	ENSBTAG00000013761	STMN1	stathmin 1 [Source:NCBI gene (formerly Entrezgene);Acc:616317]
98.536	ENSBTAG00000011202	CARD19	caspase recruitment domain family member 19 [Source:VGNC Symbol;Acc:VGNC:56938]
98.5059	ENSBTAG00000010236	CIDEB	cell death inducing DFFA like effector b [Source:VGNC Symbol;Acc:VGNC:27364]
98.4928	ENSBTAG00000001694	TYRO3	TYRO3 protein tyrosine kinase [Source:VGNC Symbol;Acc:VGNC:36551]
98.4792	ENSBTAG00000006656	RANBP1	RAN binding protein 1 [Source:NCBI gene (formerly Entrezgene);Acc:533251]
98.4716	ENSBTAG00000055082	COX6B1	cytochrome c oxidase subunit VIb polypeptide 1 (ubiquitous) [Source:NCBI gene (formerly Entrezgene);Acc:100270792]
98.4676	ENSBTAG00000016506	ST3GAL4	ST3 beta-galactoside alpha-2,3-sialyltransferase 4 [Source:VGNC Symbol;Acc:VGNC:35333]
98.4662	ENSBTAG00000055017	SCIMP	SLP adaptor and CSK interacting membrane protein [Source:VGNC Symbol;Acc:VGNC:34338]
98.4662	ENSBTAG00000018320	RPLP1	ribosomal protein lateral stalk subunit P1 [Source:VGNC Symbol;Acc:VGNC:55142]
98.4581	ENSBTAG00000021887	DPYS	dihydropyrimidinase [Source:VGNC Symbol;Acc:VGNC:28194]
98.4317	ENSBTAG00000013054	MFSD2A	major facilitator superfamily domain containing 2A [Source:VGNC Symbol;Acc:VGNC:31435]
98.4211	ENSBTAG00000003799	TARS2	threonyl-tRNA synthetase 2, mitochondrial [Source:VGNC Symbol;Acc:VGNC:49571]
98.4011	ENSBTAG00000007315	LARS2	leucyl-tRNA synthetase 2, mitochondrial [Source:VGNC Symbol;Acc:VGNC:30796]
98.3975	ENSBTAG00000055034	C5orf49	chromosome 20 C5orf49 homolog [Source:NCBI gene (formerly Entrezgene);Acc:100140616]
98.3827	ENSBTAG00000001298	STAMBPL1	STAM binding protein like 1 [Source:VGNC Symbol;Acc:VGNC:35357]
98.3628	ENSBTAG00000004200	GTPBP3	GTP binding protein 3, mitochondrial [Source:VGNC Symbol;Acc:VGNC:49552]
98.3065	ENSBTAG00000015805	SIPA1L1	signal induced proliferation associated 1 like 1 [Source:VGNC Symbol;Acc:VGNC:34628]
98.2707	ENSBTAG00000011473	MYL9	myosin light chain 9 [Source:VGNC Symbol;Acc:VGNC:57010]
98.2678	ENSBTAG00000000181	SUSD3	sushi domain containing 3 [Source:VGNC Symbol;Acc:VGNC:35488]
98.264	ENSBTAG00000016656	PARP14	poly(ADP-ribose) polymerase family member 14 [Source:NCBI gene (formerly Entrezgene);Acc:540789]
98.2607	ENSBTAG00000001858	ENSBTAG00000001858
98.2582	ENSBTAG00000030965	MCM7	minichromosome maintenance complex component 7 [Source:VGNC Symbol;Acc:VGNC:31313]
98.2324	ENSBTAG00000007659	CORO2A	coronin 2A [Source:VGNC Symbol;Acc:VGNC:27623]
98.1753	ENSBTAG00000008913	TMEM98	transmembrane protein 98 [Source:VGNC Symbol;Acc:VGNC:36130]
98.1683	ENSBTAG00000001795	LONP1	lon peptidase 1, mitochondrial [Source:VGNC Symbol;Acc:VGNC:30947]
98.1548	ENSBTAG00000014915	ETV5	ETS variant transcription factor 5 [Source:VGNC Symbol;Acc:VGNC:28631]
98.1358	ENSBTAG00000019289	ITGA2	integrin subunit alpha 2 [Source:VGNC Symbol;Acc:VGNC:30313]
98.0716	ENSBTAG00000006671	DDX27	DEAD-box helicase 27 [Source:VGNC Symbol;Acc:VGNC:56183]
98.0391	ENSBTAG00000003332	RPP40	ribonuclease P/MRP subunit p40 [Source:VGNC Symbol;Acc:VGNC:34125]
98.0322	ENSBTAG00000011865	MTA2	metastasis associated 1 family member 2 [Source:VGNC Symbol;Acc:VGNC:31714]
98.0253	ENSBTAG00000019743	CHTF18	chromosome transmission fidelity factor 18 [Source:VGNC Symbol;Acc:VGNC:27352]
97.9848	ENSBTAG00000008222	EEF2KMT	eukaryotic elongation factor 2 lysine methyltransferase [Source:NCBI gene (formerly Entrezgene);Acc:531984]
97.9633	ENSBTAG00000007097	THTPA	thiamine triphosphatase [Source:VGNC Symbol;Acc:VGNC:35852]
97.9602	ENSBTAG00000021997	ITSN1	intersectin 1 [Source:VGNC Symbol;Acc:VGNC:30352]
97.9265	ENSBTAG00000019915	GSN	gelsolin [Source:VGNC Symbol;Acc:VGNC:29680]
97.9167	ENSBTAG00000008956	CD8B	CD8b molecule [Source:NCBI gene (formerly Entrezgene);Acc:508633]
97.9022	ENSBTAG00000003017	TTC38	tetratricopeptide repeat domain 38 [Source:VGNC Symbol;Acc:VGNC:36474]
97.8798	ENSBTAG00000006542	RABEP2	rabaptin, RAB GTPase binding effector protein 2 [Source:VGNC Symbol;Acc:VGNC:33668]
97.836	ENSBTAG00000053360	ENSBTAG00000053360
97.7578	ENSBTAG00000007395	ALS2	alsin Rho guanine nucleotide exchange factor ALS2 [Source:VGNC Symbol;Acc:VGNC:25851]
97.7517	ENSBTAG00000019767	MIER2	MIER family member 2 [Source:VGNC Symbol;Acc:VGNC:31470]
97.7466	ENSBTAG00000012995	MCUB	mitochondrial calcium uniporter dominant negative subunit beta [Source:VGNC Symbol;Acc:VGNC:31326]
97.7023	ENSBTAG00000006989	SEMA4F	ssemaphorin 4F [Source:VGNC Symbol;Acc:VGNC:34437]
97.6706	ENSBTAG00000002051	ARAP1	ArfGAP with RhoGAP domain, ankyrin repeat and PH domain 1 [Source:NCBI gene (formerly Entrezgene);Acc:511889]
97.6466	ENSBTAG00000014966	PLXNB2	plexin B2 [Source:VGNC Symbol;Acc:VGNC:33062]
97.6339	ENSBTAG00000015408	DTYMK	deoxythymidylate kinase [Source:VGNC Symbol;Acc:VGNC:28240]
97.6319	ENSBTAG00000039334	ENSBTAG00000039334
97.6155	ENSBTAG00000021687	JADE2	jade family PHD finger 2 [Source:VGNC Symbol;Acc:VGNC:30359]
97.606	ENSBTAG00000012088	FBLN1	fibulin 1 [Source:VGNC Symbol;Acc:VGNC:28881]
97.5942	ENSBTAG00000018523	TRIM38	tripartite motif containing 38 [Source:VGNC Symbol;Acc:VGNC:36333]
97.5887	ENSBTAG00000038051	ENSBTAG00000038051	AFG3-like protein 1 [Source:NCBI gene (formerly Entrezgene);Acc:532875]
97.5389	ENSBTAG00000007489	NCOA3	nuclear receptor coactivator 3 [Source:VGNC Symbol;Acc:VGNC:31921]
97.4881	ENSBTAG00000013929	RRAD	RRAD, Ras related glycolysis inhibitor and calcium channel regulator [Source:VGNC Symbol;Acc:VGNC:34158]
97.4688	ENSBTAG00000019279	MLH3	mutL homolog 3 [Source:VGNC Symbol;Acc:VGNC:31498]
97.4647	ENSBTAG00000013527	PGD	phosphogluconate dehydrogenase [Source:VGNC Symbol;Acc:VGNC:32786]
97.4469	ENSBTAG00000007079	LCP1	lymphocyte cytosolic protein 1 [Source:VGNC Symbol;Acc:VGNC:30817]
97.3916	ENSBTAG00000003323	NOL6	nucleolar protein 6 [Source:VGNC Symbol;Acc:VGNC:32158]
97.3811	ENSBTAG00000018688	CBR3	carbonyl reductase 3 [Source:VGNC Symbol;Acc:VGNC:53516]
97.3683	ENSBTAG00000019718	RPS15	ribosomal protein S15 [Source:VGNC Symbol;Acc:VGNC:34131]
97.3647	ENSBTAG00000015499	VPS51	VPS51 subunit of GARP complex [Source:VGNC Symbol;Acc:VGNC:36827]
97.3612	ENSBTAG00000045817	BAP1	BRCA1 associated protein 1 [Source:VGNC Symbol;Acc:VGNC:26419]
97.3278	ENSBTAG00000013949	AHCTF1	AT-hook containing transcription factor 1 [Source:VGNC Symbol;Acc:VGNC:25749]
97.3141	ENSBTAG00000051845	ENSBTAG00000051845	uncharacterized LOC618541 [Source:NCBI gene (formerly Entrezgene);Acc:618541]
97.2828	ENSBTAG00000021151	MYH10	myosin heavy chain 10 [Source:VGNC Symbol;Acc:VGNC:31794]
97.2757	ENSBTAG00000000676	DOP1A	DOP1 leucine zipper like protein A [Source:VGNC Symbol;Acc:VGNC:28172]
97.2738	ENSBTAG00000007173	PDGFRA	platelet derived growth factor receptor alpha [Source:VGNC Symbol;Acc:VGNC:32692]
97.2673	ENSBTAG00000011083	POLD1	DNA polymerase delta 1, catalytic subunit [Source:VGNC Symbol;Acc:VGNC:33113]
97.2376	ENSBTAG00000005448	ENSBTAG00000005448	ras GTPase-activating protein 4 [Source:NCBI gene (formerly Entrezgene);Acc:521224]
97.2046	ENSBTAG00000006848	DHX34	DExH-box helicase 34 [Source:VGNC Symbol;Acc:VGNC:28052]
97.189	ENSBTAG00000015913	MFHAS1	malignant fibrous histiocytoma amplified sequence 1 [Source:NCBI gene (formerly Entrezgene);Acc:782395]
97.1861	ENSBTAG00000052397	ENSBTAG00000052397	interleukin 32-like [Source:NCBI gene (formerly Entrezgene);Acc:100139916]
97.157	ENSBTAG00000008121	RSPO3	R-spondin 3 [Source:NCBI gene (formerly Entrezgene);Acc:534650]
97.1244	ENSBTAG00000015343	DYNC2I2	dynein 2 intermediate chain 2 [Source:VGNC Symbol;Acc:VGNC:36893]
97.0805	ENSBTAG00000016762	SLC25A12	solute carrier family 25 member 12 [Source:VGNC Symbol;Acc:VGNC:34743]
97.0626	ENSBTAG00000016561	NUBP2	nucleotide binding protein 2 [Source:VGNC Symbol;Acc:VGNC:32316]
97.0257	ENSBTAG00000011554	SURF6	surfeit 6 [Source:VGNC Symbol;Acc:VGNC:35485]
97.0201	ENSBTAG00000026748	GULO	L-gulono-gamma-lactone oxidase [Source:NCBI gene (formerly Entrezgene);Acc:286812]
96.9998	ENSBTAG00000005631	VARS1	valyl-tRNA synthetase 1 [Source:VGNC Symbol;Acc:VGNC:36765]
96.9981	ENSBTAG00000016913	AVIL	advillin [Source:VGNC Symbol;Acc:VGNC:26354]
96.9833	ENSBTAG00000004014	FBLN2	fibulin 2 [Source:VGNC Symbol;Acc:VGNC:28882]
96.9199	ENSBTAG00000033702	STARD8	StAR related lipid transfer domain containing 8 [Source:VGNC Symbol;Acc:VGNC:35369]
96.9089	ENSBTAG00000021339	SCN8A	sodium voltage-gated channel alpha subunit 8 [Source:VGNC Symbol;Acc:VGNC:34354]
96.8881	ENSBTAG00000010721	MCM3	minichromosome maintenance complex component 3 [Source:VGNC Symbol;Acc:VGNC:31309]
96.8769	ENSBTAG00000005012	HSPH1	heat shock protein family H (Hsp110) member 1 [Source:VGNC Symbol;Acc:VGNC:53817]
96.855	ENSBTAG00000007244	NID1	nidogen 1 [Source:VGNC Symbol;Acc:VGNC:55991]
96.7643	ENSBTAG00000014064	FGFR2	fibroblast growth factor receptor 2 [Source:VGNC Symbol;Acc:VGNC:28987]
96.7024	ENSBTAG00000014297	MOV10	Mov10 RISC complex RNA helicase [Source:VGNC Symbol;Acc:VGNC:31566]
96.6768	ENSBTAG00000019871	TRMT2A	tRNA methyltransferase 2 homolog A [Source:VGNC Symbol;Acc:VGNC:36372]
96.6551	ENSBTAG00000015178	ECI2	enoyl-CoA delta isomerase 2 [Source:VGNC Symbol;Acc:VGNC:28310]
96.6527	ENSBTAG00000027409	SLC4A11	solute carrier family 4 member 11 [Source:VGNC Symbol;Acc:VGNC:34891]
96.5732	ENSBTAG00000010504	TBRG4	transforming growth factor beta regulator 4 [Source:VGNC Symbol;Acc:VGNC:35664]
96.5692	ENSBTAG00000047652	RBMXL2	RBMX like 2 [Source:NCBI gene (formerly Entrezgene);Acc:617969]
96.523	ENSBTAG00000006995	SPTBN1	spectrin beta, non-erythrocytic 1 [Source:VGNC Symbol;Acc:VGNC:35253]
96.461	ENSBTAG00000013251	HDGFL2	HDGF like 2 [Source:NCBI gene (formerly Entrezgene);Acc:512959]
96.4377	ENSBTAG00000008293	GPCPD1	glycerophosphocholine phosphodiesterase 1 [Source:VGNC Symbol;Acc:VGNC:29528]
96.3729	ENSBTAG00000013717	PRAP1	proline rich acidic protein 1 [Source:VGNC Symbol;Acc:VGNC:55965]
96.3638	ENSBTAG00000012116	HNF4A	hepatocyte nuclear factor 4 alpha [Source:VGNC Symbol;Acc:VGNC:29891]
96.3604	ENSBTAG00000012820	STX3	syntaxin 3 [Source:VGNC Symbol;Acc:VGNC:35439]
96.1827	ENSBTAG00000001597	PITPNM2	phosphatidylinositol transfer protein membrane associated 2 [Source:VGNC Symbol;Acc:VGNC:32922]
96.1592	ENSBTAG00000001489	TUBA1A	tubulin, alpha 1a [Source:NCBI gene (formerly Entrezgene);Acc:404053]
96.0495	ENSBTAG00000006846	LGALS9	galectin 9 [Source:NCBI gene (formerly Entrezgene);Acc:510813]
95.9993	ENSBTAG00000020281	NIN	ninein [Source:VGNC Symbol;Acc:VGNC:32077]
95.995	ENSBTAG00000008635	SULT1A1	sulfotransferase family, cytosolic, 1A, phenol-preferring, member 1 [Source:NCBI gene (formerly Entrezgene);Acc:282485]
95.9583	ENSBTAG00000017574	LMNA	lamin A/C [Source:VGNC Symbol;Acc:VGNC:30929]
95.8296	ENSBTAG00000047339	BCOR	BCL6 corepressor [Source:VGNC Symbol;Acc:VGNC:56520]
95.8214	ENSBTAG00000044135	PIGO	phosphatidylinositol glycan anchor biosynthesis class O [Source:VGNC Symbol;Acc:VGNC:32874]
95.7743	ENSBTAG00000019418	UBE3D	ubiquitin protein ligase E3D [Source:VGNC Symbol;Acc:VGNC:36602]
95.7517	ENSBTAG00000009376	DPH1	diphthamide biosynthesis 1 [Source:VGNC Symbol;Acc:VGNC:28178]
95.7491	ENSBTAG00000009617	SLC2A1	solute carrier family 2 member 1 [Source:VGNC Symbol;Acc:VGNC:34796]
95.6628	ENSBTAG00000015129	KLK10	kallikrein related peptidase 10 [Source:VGNC Symbol;Acc:VGNC:30672]
95.6411	ENSBTAG00000009121	STAG2	stromal antigen 2 [Source:VGNC Symbol;Acc:VGNC:35354]
95.6365	ENSBTAG00000013702	ZNF296	zinc finger protein 296 [Source:VGNC Symbol;Acc:VGNC:37240]
95.6228	ENSBTAG00000001754	AHCYL2	adenosylhomocysteinase like 2 [Source:VGNC Symbol;Acc:VGNC:25752]
95.4517	ENSBTAG00000002719	ORC1	origin recognition complex subunit 1 [Source:VGNC Symbol;Acc:VGNC:32446]
95.4118	ENSBTAG00000006886	FAM117A	family with sequence similarity 117 member A [Source:VGNC Symbol;Acc:VGNC:28719]
95.18	ENSBTAG00000009831	OCA2	OCA2 melanosomal transmembrane protein [Source:VGNC Symbol;Acc:VGNC:50237]
95.1308	ENSBTAG00000031178	SLC9A9	solute carrier family 9 member A9 [Source:VGNC Symbol;Acc:VGNC:34947]
95.1233	ENSBTAG00000012849	COL4A1	collagen type IV alpha 1 chain [Source:VGNC Symbol;Acc:VGNC:50081]
95.0768	ENSBTAG00000008253	EXPH5	exophilin 5 [Source:VGNC Symbol;Acc:VGNC:28664]
95.0744	ENSBTAG00000006422	TRIM28	tripartite motif containing 28 [Source:VGNC Symbol;Acc:VGNC:36324]
95.0607	ENSBTAG00000002258	APOA1	apolipoprotein A1 [Source:VGNC Symbol;Acc:VGNC:26022]
95.057	ENSBTAG00000007895	SLC20A1	solute carrier family 20 member 1 [Source:VGNC Symbol;Acc:VGNC:34717]
94.93	ENSBTAG00000030882	ENSBTAG00000030882	estradiol 17-beta-dehydrogenase 12-like [Source:NCBI gene (formerly Entrezgene);Acc:508455]
94.8145	ENSBTAG00000003014	TRPV2	transient receptor potential cation channel subfamily V member 2 [Source:VGNC Symbol;Acc:VGNC:36398]
94.8091	ENSBTAG00000000837	PARP1	poly(ADP-ribose) polymerase 1 [Source:NCBI gene (formerly Entrezgene);Acc:286764]
94.7652	ENSBTAG00000021945	NID2	nidogen 2 [Source:VGNC Symbol;Acc:VGNC:32074]
94.7645	ENSBTAG00000007169	P2RX1	purinergic receptor P2X 1 [Source:VGNC Symbol;Acc:VGNC:32517]
94.751	ENSBTAG00000017255	ATAD2B	ATPase family AAA domain containing 2B [Source:VGNC Symbol;Acc:VGNC:26234]
94.7038	ENSBTAG00000004732	SPTB	spectrin beta, erythrocytic [Source:VGNC Symbol;Acc:VGNC:35252]
94.6431	ENSBTAG00000011784	FGR	FGR proto-oncogene, Src family tyrosine kinase [Source:VGNC Symbol;Acc:VGNC:28994]
94.6348	ENSBTAG00000011079	C18H19orf48	chromosome 18 C19orf48 homolog [Source:NCBI gene (formerly Entrezgene);Acc:516719]
94.5801	ENSBTAG00000007964	ARPC4	actin related protein 2/3 complex subunit 4 [Source:NCBI gene (formerly Entrezgene);Acc:539459]
94.5651	ENSBTAG00000012157	CCDC158	coiled-coil domain containing 158 [Source:VGNC Symbol;Acc:VGNC:26862]
94.5446	ENSBTAG00000005596	IGFBP2	insulin like growth factor binding protein 2 [Source:VGNC Symbol;Acc:VGNC:30084]
94.5002	ENSBTAG00000010689	NRG2	neuregulin 2 [Source:VGNC Symbol;Acc:VGNC:55226]
94.4886	ENSBTAG00000005573	SCAND1	SCAN domain containing 1 [Source:VGNC Symbol;Acc:VGNC:57023]
94.4635	ENSBTAG00000012064	ZNF473	zinc finger protein 473 [Source:VGNC Symbol;Acc:VGNC:52284]
94.4213	ENSBTAG00000007163	SLC44A1	solute carrier family 44 member 1 [Source:VGNC Symbol;Acc:VGNC:56984]
94.3433	ENSBTAG00000003788	RCC1	regulator of chromosome condensation 1 [Source:VGNC Symbol;Acc:VGNC:33825]
94.3329	ENSBTAG00000001021	CYP1A1	cytochrome P450, subfamily I (aromatic compound-inducible), polypeptide 1 [Source:NCBI gene (formerly Entrezgene);Acc:282870]
94.2635	ENSBTAG00000024957	SNCA	synuclein alpha [Source:VGNC Symbol;Acc:VGNC:35059]
94.1836	ENSBTAG00000018205	PHC1	polyhomeotic homolog 1 [Source:VGNC Symbol;Acc:VGNC:32810]
94.1281	ENSBTAG00000019866	NRP1	neuropilin 1 [Source:VGNC Symbol;Acc:VGNC:32266]
94.1122	ENSBTAG00000002370	ZNF792	zinc finger protein 792 [Source:VGNC Symbol;Acc:VGNC:37348]
93.9316	ENSBTAG00000016006	ANKRD11	ankyrin repeat domain 11 [Source:VGNC Symbol;Acc:VGNC:25910]
93.8831	ENSBTAG00000018729	SPEN	spen family transcriptional repressor [Source:VGNC Symbol;Acc:VGNC:35204]
93.8532	ENSBTAG00000016959	LAPTM4B	lysosomal protein transmembrane 4 beta [Source:NCBI gene (formerly Entrezgene);Acc:404155]
93.7653	ENSBTAG00000019779	RAB39B	RAB39B, member RAS oncogene family [Source:VGNC Symbol;Acc:VGNC:33648]
93.6694	ENSBTAG00000004460	RFWD3	ring finger and WD repeat domain 3 [Source:VGNC Symbol;Acc:VGNC:33893]
93.6483	ENSBTAG00000003639	ELMO2	engulfment and cell motility 2 [Source:VGNC Symbol;Acc:VGNC:28439]
93.6426	ENSBTAG00000009864	B4GALNT2	beta-1,4-N-acetyl-galactosaminyltransferase 2 [Source:VGNC Symbol;Acc:VGNC:26386]
93.5676	ENSBTAG00000004401	UGGT2	UDP-glucose glycoprotein glucosyltransferase 2 [Source:VGNC Symbol;Acc:VGNC:36650]
93.5373	ENSBTAG00000004337	PDE1B	phosphodiesterase 1B [Source:VGNC Symbol;Acc:VGNC:32672]
93.5221	ENSBTAG00000011934	PCK2	phosphoenolpyruvate carboxykinase 2, mitochondrial [Source:VGNC Symbol;Acc:VGNC:32632]
93.4243	ENSBTAG00000039719	PHGDH	phosphoglycerate dehydrogenase [Source:VGNC Symbol;Acc:VGNC:55654]
93.4227	ENSBTAG00000030600	BCNT2	bucentaur-2 [Source:NCBI gene (formerly Entrezgene);Acc:514131]
93.4053	ENSBTAG00000009427	PPM1D	protein phosphatase, Mg2+/Mn2+ dependent 1D [Source:VGNC Symbol;Acc:VGNC:33210]
93.1639	ENSBTAG00000039722	ENSBTAG00000039722	aldo-keto reductase family 1, member C1-like [Source:NCBI gene (formerly Entrezgene);Acc:782061]
93.1099	ENSBTAG00000004761	FOXH1	forkhead box H1 [Source:VGNC Symbol;Acc:VGNC:29086]
93.0225	ENSBTAG00000009493	BCL3	BCL3 transcription coactivator [Source:VGNC Symbol;Acc:VGNC:58663]
92.8983	ENSBTAG00000005299	EDNRB	endothelin receptor type B [Source:VGNC Symbol;Acc:VGNC:28330]
92.8149	ENSBTAG00000005757	FUS	FUS RNA binding protein [Source:VGNC Symbol;Acc:VGNC:29147]
92.7098	ENSBTAG00000004896	ABLIM3	actin binding LIM protein family member 3 [Source:VGNC Symbol;Acc:VGNC:25509]
92.6827	ENSBTAG00000004521	LSM7	LSM7 homolog, U6 small nuclear RNA and mRNA degradation associated [Source:VGNC Symbol;Acc:VGNC:31059]
92.4607	ENSBTAG00000010123	APOE	apolipoprotein E [Source:VGNC Symbol;Acc:VGNC:52178]
92.4245	ENSBTAG00000008951	ALPL	alkaline phosphatase, biomineralization associated [Source:VGNC Symbol;Acc:VGNC:25850]
92.4207	ENSBTAG00000012938	JARID2	jumonji and AT-rich interaction domain containing 2 [Source:VGNC Symbol;Acc:VGNC:30371]
92.4128	ENSBTAG00000000524	CSTB	cystatin B (stefin B) [Source:NCBI gene (formerly Entrezgene);Acc:512805]
92.3653	ENSBTAG00000015782	SCAP	SREBF chaperone [Source:VGNC Symbol;Acc:VGNC:34320]
92.3367	ENSBTAG00000051254	RPL37A	ribosomal protein L37a [Source:NCBI gene (formerly Entrezgene);Acc:504413]
92.3265	ENSBTAG00000006429	ACO2	aconitase 2 [Source:VGNC Symbol;Acc:VGNC:25546]
92.2864	ENSBTAG00000032591	CTHRC1	collagen triple helix repeat containing 1 [Source:VGNC Symbol;Acc:VGNC:27796]
91.9673	ENSBTAG00000012700	CD247	CD247 molecule [Source:VGNC Symbol;Acc:VGNC:27016]
91.9307	ENSBTAG00000020090	EPHX3	epoxide hydrolase 3 [Source:VGNC Symbol;Acc:VGNC:28543]
91.9234	ENSBTAG00000017280	C3	complement C3 [Source:VGNC Symbol;Acc:VGNC:26638]
91.8495	ENSBTAG00000020446	THOP1	thimet oligopeptidase 1 [Source:VGNC Symbol;Acc:VGNC:35843]
91.8325	ENSBTAG00000018808	SLC25A35	solute carrier family 25 member 35 [Source:VGNC Symbol;Acc:VGNC:34761]
91.807	ENSBTAG00000007484	ACADS	acyl-CoA dehydrogenase short chain [Source:VGNC Symbol;Acc:VGNC:53886]
91.785	ENSBTAG00000045904	PIM3	Pim-3 proto-oncogene, serine/threonine kinase [Source:VGNC Symbol;Acc:VGNC:32901]
91.6363	ENSBTAG00000002328	KDM2B	lysine demethylase 2B [Source:VGNC Symbol;Acc:VGNC:30524]
91.5998	ENSBTAG00000054239	ENSBTAG00000054239	kinesin family member 1B [Source:NCBI gene (formerly Entrezgene);Acc:100337161]
91.5803	ENSBTAG00000012675	MYO19	myosin XIX [Source:VGNC Symbol;Acc:VGNC:31815]
91.5552	ENSBTAG00000003101	SALL4	spalt like transcription factor 4 [Source:VGNC Symbol;Acc:VGNC:34265]
91.4971	ENSBTAG00000047265	ENSBTAG00000047265	protein phosphatase 1 regulatory inhibitor subunit 14B [Source:NCBI gene (formerly Entrezgene);Acc:617154]
91.3703	ENSBTAG00000037986	PNMA2	PNMA family member 2 [Source:VGNC Symbol;Acc:VGNC:33084]
91.3029	ENSBTAG00000020873	MAT2A	methionine adenosyltransferase 2A [Source:VGNC Symbol;Acc:VGNC:50214]
91.2291	ENSBTAG00000039453	ENSBTAG00000039453	zinc finger protein 324A [Source:NCBI gene (formerly Entrezgene);Acc:100847773]
91.1706	ENSBTAG00000049102	ENSBTAG00000049102	zinc finger BED-type containing 9 [Source:NCBI gene (formerly Entrezgene);Acc:104970957]
91.1655	ENSBTAG00000009795	SF3B5	splicing factor 3b subunit 5 [Source:VGNC Symbol;Acc:VGNC:34512]
91.1211	ENSBTAG00000007519	ADAR	adenosine deaminase RNA specific [Source:VGNC Symbol;Acc:VGNC:25635]
91.1116	ENSBTAG00000014835	SPARC	secreted protein acidic and cysteine rich [Source:VGNC Symbol;Acc:VGNC:35171]
91.0888	ENSBTAG00000023907	COL18A1	collagen type XVIII alpha 1 chain [Source:VGNC Symbol;Acc:VGNC:27559]
91.0024	ENSBTAG00000010362	NOSTRIN	nitric oxide synthase trafficking [Source:VGNC Symbol;Acc:VGNC:32176]
90.9628	ENSBTAG00000020184	AQP8	aquaporin 8 [Source:VGNC Symbol;Acc:VGNC:26050]
90.9326	ENSBTAG00000014728	TAPBPL	TAP binding protein like [Source:VGNC Symbol;Acc:VGNC:35600]
90.9242	ENSBTAG00000018165	RIPOR2	RHO family interacting cell polarization regulator 2 [Source:VGNC Symbol;Acc:VGNC:54232]
90.8043	ENSBTAG00000006882	IQGAP3	IQ motif containing GTPase activating protein 3 [Source:VGNC Symbol;Acc:VGNC:30260]
90.8015	ENSBTAG00000002378	NUCB1	nucleobindin 1 [Source:VGNC Symbol;Acc:VGNC:32318]
90.7773	ENSBTAG00000038154	HSH2D	hematopoietic SH2 domain containing [Source:VGNC Symbol;Acc:VGNC:29986]
90.7584	ENSBTAG00000010740	CLTB	clathrin light chain B [Source:VGNC Symbol;Acc:VGNC:27470]
90.7431	ENSBTAG00000049677	ENSBTAG00000049677
90.6937	ENSBTAG00000012380	HK1	hexokinase 1 [Source:VGNC Symbol;Acc:VGNC:29864]
90.6914	ENSBTAG00000012109	EDN3	endothelin 3 [Source:VGNC Symbol;Acc:VGNC:56185]
90.6543	ENSBTAG00000001564	PDE4DIP	phosphodiesterase 4D interacting protein [Source:VGNC Symbol;Acc:VGNC:55072]
90.6542	ENSBTAG00000001626	CTPS1	CTP synthase 1 [Source:VGNC Symbol;Acc:VGNC:27808]
90.6476	ENSBTAG00000011963	RPS19	ribosomal protein S19 [Source:NCBI gene (formerly Entrezgene);Acc:516063]
90.3975	ENSBTAG00000014354	FXYD6	FXYD domain containing ion transport regulator 6 [Source:VGNC Symbol;Acc:VGNC:54871]
90.3909	ENSBTAG00000021190	CDH2	cadherin 2 [Source:VGNC Symbol;Acc:VGNC:27098]
90.3357	ENSBTAG00000047502	FKBP5	FKBP prolyl isomerase 5 [Source:VGNC Symbol;Acc:VGNC:29024]
90.293	ENSBTAG00000015283	RPL32	ribosomal protein L32 [Source:VGNC Symbol;Acc:VGNC:55077]
90.185	ENSBTAG00000001961	MAP1B	microtubule associated protein 1B [Source:VGNC Symbol;Acc:VGNC:31178]
90.1792	ENSBTAG00000006288	VSTM4	V-set and transmembrane domain containing 4 [Source:VGNC Symbol;Acc:VGNC:54511]
90.1631	ENSBTAG00000031340	SLC6A20	solute carrier family 6 member 20 [Source:VGNC Symbol;Acc:VGNC:34921]
90.0457	ENSBTAG00000002691	ELMOD1	ELMO domain containing 1 [Source:VGNC Symbol;Acc:VGNC:28441]
90.0255	ENSBTAG00000007099	AP1G2	adaptor related protein complex 1 subunit gamma 2 [Source:VGNC Symbol;Acc:VGNC:25978]
90.0226	ENSBTAG00000014380	MCM2	minichromosome maintenance complex component 2 [Source:VGNC Symbol;Acc:VGNC:31308]
90.0147	ENSBTAG00000021262	SNRPD3	small nuclear ribonucleoprotein D3 polypeptide [Source:VGNC Symbol;Acc:VGNC:35080]
90.0093	ENSBTAG00000003774	C8A	complement C8 alpha chain [Source:VGNC Symbol;Acc:VGNC:26644]
89.9633	ENSBTAG00000011543	PDCD1	programmed cell death 1 [Source:VGNC Symbol;Acc:VGNC:32657]
89.9509	ENSBTAG00000006948	GARNL3	GTPase activating Rap/RanGAP domain like 3 [Source:VGNC Symbol;Acc:VGNC:29253]
89.9175	ENSBTAG00000052720	ENSBTAG00000052720
89.8591	ENSBTAG00000030222	L3MBTL2	L3MBTL histone methyl-lysine binding protein 2 [Source:VGNC Symbol;Acc:VGNC:30763]
89.8485	ENSBTAG00000047225	BCL2L14	BCL2 like 14 [Source:VGNC Symbol;Acc:VGNC:26448]
89.7673	ENSBTAG00000021058	DDX42	DEAD-box helicase 42 [Source:VGNC Symbol;Acc:VGNC:27968]
89.7292	ENSBTAG00000007636	IRAK3	interleukin 1 receptor associated kinase 3 [Source:VGNC Symbol;Acc:VGNC:30267]
89.4204	ENSBTAG00000012191	WWC2	WW and C2 domain containing 2 [Source:VGNC Symbol;Acc:VGNC:36975]
89.368	ENSBTAG00000025263	FAM160A1	family with sequence similarity 160 member A1 [Source:VGNC Symbol;Acc:VGNC:28739]
89.2216	ENSBTAG00000006160	SUOX	sulfite oxidase [Source:VGNC Symbol;Acc:VGNC:35477]
89.1884	ENSBTAG00000018527	HDGFL3	HDGF like 3 [Source:VGNC Symbol;Acc:VGNC:53939]
89.1238	ENSBTAG00000011944	MTTP	microsomal triglyceride transfer protein [Source:VGNC Symbol;Acc:VGNC:31754]
89.0797	ENSBTAG00000008386	CLPX	caseinolytic mitochondrial matrix peptidase chaperone subunit X [Source:VGNC Symbol;Acc:VGNC:27462]
89.0165	ENSBTAG00000007740	MDK	midkine [Source:VGNC Symbol;Acc:VGNC:49556]
88.9762	ENSBTAG00000019683	LYPD6B	LY6/PLAUR domain containing 6B [Source:VGNC Symbol;Acc:VGNC:31104]
88.9709	ENSBTAG00000014595	LIG1	DNA ligase 1 [Source:VGNC Symbol;Acc:VGNC:30882]
88.8999	ENSBTAG00000004009	PMM1	phosphomannomutase 1 [Source:VGNC Symbol;Acc:VGNC:33072]
88.8015	ENSBTAG00000003845	CSRNP1	cysteine and serine rich nuclear protein 1 [Source:VGNC Symbol;Acc:VGNC:27772]
88.7709	ENSBTAG00000001209	PHLDB2	pleckstrin homology like domain family B member 2 [Source:VGNC Symbol;Acc:VGNC:32838]
88.7243	ENSBTAG00000013562	SKP2	S-phase kinase associated protein 2 [Source:NCBI gene (formerly Entrezgene);Acc:519018]
88.7046	ENSBTAG00000007783	MYBL2	MYB proto-oncogene like 2 [Source:VGNC Symbol;Acc:VGNC:31779]
88.6173	ENSBTAG00000011971	NRP2	neuropilin 2 [Source:VGNC Symbol;Acc:VGNC:32267]
88.4651	ENSBTAG00000021301	ACSF2	acyl-CoA synthetase family member 2 [Source:VGNC Symbol;Acc:VGNC:25562]
88.3116	ENSBTAG00000017894	CAD	carbamoyl-phosphate synthetase 2, aspartate transcarbamylase, and dihydroorotase [Source:VGNC Symbol;Acc:VGNC:59209]
88.247	ENSBTAG00000007807	HSPA2	heat shock protein family A (Hsp70) member 2 [Source:NCBI gene (formerly Entrezgene);Acc:281827]
88.1448	ENSBTAG00000010698	VARS2	valyl-tRNA synthetase 2, mitochondrial [Source:VGNC Symbol;Acc:VGNC:36766]
88.0758	ENSBTAG00000002977	ECE1	endothelin converting enzyme 1 [Source:VGNC Symbol;Acc:VGNC:28302]
88.0742	ENSBTAG00000017863	SRGN	serglycin [Source:VGNC Symbol;Acc:VGNC:35280]
87.9838	ENSBTAG00000002457	SEC61B	SEC61 translocon subunit beta [Source:VGNC Symbol;Acc:VGNC:49570]
87.92	ENSBTAG00000006007	SH3GL1	SH3 domain containing GRB2 like 1, endophilin A2 [Source:VGNC Symbol;Acc:VGNC:34572]
87.8712	ENSBTAG00000001385	ZSCAN2	zinc finger and SCAN domain containing 2 [Source:VGNC Symbol;Acc:VGNC:37375]
87.7817	ENSBTAG00000024815	ANKRD28	ankyrin repeat domain 28 [Source:VGNC Symbol;Acc:VGNC:25920]
87.7635	ENSBTAG00000017446	E2F8	E2F transcription factor 8 [Source:VGNC Symbol;Acc:VGNC:28292]
87.6148	ENSBTAG00000019267	MMP2	matrix metallopeptidase 2 [Source:VGNC Symbol;Acc:VGNC:31524]
87.5822	ENSBTAG00000020904	JAK3	Janus kinase 3 [Source:VGNC Symbol;Acc:VGNC:30366]
87.5341	ENSBTAG00000001781	TOMM40	translocase of outer mitochondrial membrane 40 [Source:VGNC Symbol;Acc:VGNC:49148]
87.4232	ENSBTAG00000019015	IFITM3	interferon induced transmembrane protein 3 (1-8U) [Source:NCBI gene (formerly Entrezgene);Acc:282255]
87.1108	ENSBTAG00000011960	GOT1	glutamic-oxaloacetic transaminase 1 [Source:VGNC Symbol;Acc:VGNC:29501]
87.0276	ENSBTAG00000024884	TEDC2	cyclin F [Source:NCBI gene (formerly Entrezgene);Acc:505200]
86.9821	ENSBTAG00000016881	ANPEP	alanyl aminopeptidase, membrane [Source:VGNC Symbol;Acc:VGNC:25960]
86.9422	ENSBTAG00000040427	ENSBTAG00000040427	Rho GTPase activating protein 19 [Source:NCBI gene (formerly Entrezgene);Acc:526945]
86.8921	ENSBTAG00000018463	VIM	vimentin [Source:VGNC Symbol;Acc:VGNC:36796]
86.7734	ENSBTAG00000010531	CYP1B1	cytochrome P450, family 1, subfamily B, polypeptide 1 [Source:NCBI gene (formerly Entrezgene);Acc:511470]
86.6351	ENSBTAG00000032821	SCEL	sciellin [Source:VGNC Symbol;Acc:VGNC:34329]
86.296	ENSBTAG00000014027	TRIM36	tripartite motif containing 36 [Source:VGNC Symbol;Acc:VGNC:36331]
86.2155	ENSBTAG00000045695	SLC6A19	solute carrier family 6 member 19 [Source:VGNC Symbol;Acc:VGNC:34919]
86.2044	ENSBTAG00000002549	PTMA	prothymosin alpha [Source:NCBI gene (formerly Entrezgene);Acc:786336]
86.1921	ENSBTAG00000025003	INTS10	integrator complex subunit 10 [Source:VGNC Symbol;Acc:VGNC:30224]
86.0992	ENSBTAG00000006707	ACSL5	acyl-CoA synthetase long chain family member 5 [Source:VGNC Symbol;Acc:VGNC:25567]
86.0539	ENSBTAG00000018910	WDR6	WD repeat domain 6 [Source:VGNC Symbol;Acc:VGNC:36908]
85.9672	ENSBTAG00000044006	GINS2	GINS complex subunit 2 [Source:VGNC Symbol;Acc:VGNC:29361]
85.8736	ENSBTAG00000021000	USF3	upstream transcription factor family member 3 [Source:VGNC Symbol;Acc:VGNC:53612]
85.7087	ENSBTAG00000001027	SERPINH1	serpin family H member 1 [Source:VGNC Symbol;Acc:VGNC:34480]
85.6581	ENSBTAG00000044100	HEATR1	Bos taurus HEAT repeat containing 1 (HEATR1), mRNA. [Source:RefSeq mRNA;Acc:NM_001076448]
85.6478	ENSBTAG00000016305	ATP13A4	ATPase 13A4 [Source:VGNC Symbol;Acc:VGNC:26280]
85.5918	ENSBTAG00000011832	ALDH18A1	aldehyde dehydrogenase 18 family member A1 [Source:VGNC Symbol;Acc:VGNC:25807]
85.5872	ENSBTAG00000002645	SH3BP5L	SH3 binding domain protein 5 like [Source:VGNC Symbol;Acc:VGNC:34569]
85.5214	ENSBTAG00000014862	ENSBTAG00000014862
85.4048	ENSBTAG00000001004	ESAM	endothelial cell adhesion molecule [Source:VGNC Symbol;Acc:VGNC:50042]
85.2715	ENSBTAG00000009366	ARF5	ADP ribosylation factor 5 [Source:VGNC Symbol;Acc:VGNC:26060]
85.2586	ENSBTAG00000015436	SLC27A4	solute carrier family 27 member 4 [Source:VGNC Symbol;Acc:VGNC:34788]
85.1707	ENSBTAG00000008181	CHAF1A	chromatin assembly factor 1 subunit A [Source:VGNC Symbol;Acc:VGNC:27266]
85.1065	ENSBTAG00000023343	RPL28	ribosomal protein L28 [Source:VGNC Symbol;Acc:VGNC:34114]
84.9522	ENSBTAG00000017091	CMTR1	cap methyltransferase 1 [Source:VGNC Symbol;Acc:VGNC:27489]
84.73	ENSBTAG00000021111	POU5F1	POU class 5 homeobox 1 [Source:NCBI gene (formerly Entrezgene);Acc:282316]
84.2789	ENSBTAG00000016819	FABP3	fatty acid binding protein 3 [Source:VGNC Symbol;Acc:VGNC:28697]
84.2406	ENSBTAG00000001708	TTLL12	tubulin tyrosine ligase like 12 [Source:VGNC Symbol;Acc:VGNC:36491]
84.1837	ENSBTAG00000017852	ALDH9A1	aldehyde dehydrogenase 9 family member A1 [Source:VGNC Symbol;Acc:VGNC:25820]
83.9779	ENSBTAG00000000146	FARP1	FERM, ARH/RhoGEF and pleckstrin domain protein 1 [Source:VGNC Symbol;Acc:VGNC:28865]
83.9322	ENSBTAG00000015598	RPS10	ribosomal protein S10 [Source:VGNC Symbol;Acc:VGNC:55922]
83.9182	ENSBTAG00000014269	SCARB1	scavenger receptor class B member 1 [Source:VGNC Symbol;Acc:VGNC:34324]
83.895	ENSBTAG00000015789	BCAN	brevican [Source:VGNC Symbol;Acc:VGNC:26434]
83.8884	ENSBTAG00000025494	PAQR8	progestin and adipoQ receptor family member 8 [Source:VGNC Symbol;Acc:VGNC:32580]
83.8229	ENSBTAG00000034848	F2RL1	F2R like trypsin receptor 1 [Source:VGNC Symbol;Acc:VGNC:28684]
83.7062	ENSBTAG00000020062	TMC4	transmembrane channel like 4 [Source:VGNC Symbol;Acc:VGNC:35920]
83.6502	ENSBTAG00000011854	SLC38A5	solute carrier family 38 member 5 [Source:VGNC Symbol;Acc:VGNC:34852]
83.5866	ENSBTAG00000013577	SLC1A5	solute carrier family 1 member 5 [Source:VGNC Symbol;Acc:VGNC:34715]
83.4982	ENSBTAG00000010820	WNT11	Wnt family member 11 [Source:VGNC Symbol;Acc:VGNC:36955]
83.3875	ENSBTAG00000007737	UBA52	ubiquitin A-52 residue ribosomal protein fusion product 1 [Source:VGNC Symbol;Acc:VGNC:49988]
83.2954	ENSBTAG00000004796	GRP	gastrin releasing peptide [Source:VGNC Symbol;Acc:VGNC:29664]
83.272	ENSBTAG00000016590	NME4	NME/NM23 nucleoside diphosphate kinase 4 [Source:NCBI gene (formerly Entrezgene);Acc:789324]
83.2646	ENSBTAG00000020067	LLGL2	LLGL scribble cell polarity complex component 2 [Source:VGNC Symbol;Acc:VGNC:30916]
83.2562	ENSBTAG00000007430	MYBBP1A	MYB binding protein 1a [Source:VGNC Symbol;Acc:VGNC:31777]
83.2285	ENSBTAG00000018204	MYH1	myosin heavy chain 1 [Source:VGNC Symbol;Acc:VGNC:55851]
83.1342	ENSBTAG00000000913	UQCR10	ubiquinol-cytochrome c reductase, complex III subunit X [Source:VGNC Symbol;Acc:VGNC:36693]
83.0087	ENSBTAG00000016092	SPATS2L	spermatogenesis associated serine rich 2 like [Source:VGNC Symbol;Acc:VGNC:35194]
82.5511	ENSBTAG00000007480	CIRBP	cold inducible RNA binding protein [Source:VGNC Symbol;Acc:VGNC:52752]
82.4406	ENSBTAG00000050137	ENSBTAG00000050137
82.3725	ENSBTAG00000014314	HPS1	HPS1 biogenesis of lysosomal organelles complex 3 subunit 1 [Source:VGNC Symbol;Acc:VGNC:29943]
82.3362	ENSBTAG00000014023	SIRT1	sirtuin 1 [Source:VGNC Symbol;Acc:VGNC:34630]
81.8535	ENSBTAG00000005574	CLU	clusterin [Source:NCBI gene (formerly Entrezgene);Acc:280750]
81.7777	ENSBTAG00000015547	SLC26A3	solute carrier family 26 member 3 [Source:VGNC Symbol;Acc:VGNC:34778]
81.723	ENSBTAG00000033515	ENSBTAG00000033515
81.6567	ENSBTAG00000032875	BEX2	brain expressed X-linked 2 [Source:NCBI gene (formerly Entrezgene);Acc:767968]
81.6081	ENSBTAG00000010254	MAP3K6	mitogen-activated protein kinase kinase kinase 6 [Source:VGNC Symbol;Acc:VGNC:31199]
81.4795	ENSBTAG00000003994	IGFBP3	insulin like growth factor binding protein 3 [Source:VGNC Symbol;Acc:VGNC:30085]
81.2931	ENSBTAG00000019028	STOX1	storkhead box 1 [Source:VGNC Symbol;Acc:VGNC:35414]
81.2864	ENSBTAG00000006268	IKBKG	inhibitor of nuclear factor kappa B kinase regulatory subunit gamma [Source:VGNC Symbol;Acc:VGNC:30102]
81.2081	ENSBTAG00000020605	SMTNL2	smoothelin like 2 [Source:VGNC Symbol;Acc:VGNC:35037]
81.0064	ENSBTAG00000015831	RPL18A	ribosomal protein L18a [Source:VGNC Symbol;Acc:VGNC:34112]
80.8875	ENSBTAG00000006253	FLNC	filamin C [Source:VGNC Symbol;Acc:VGNC:29035]
80.7905	ENSBTAG00000004860	SLC27A6	solute carrier family 27 member 6 [Source:VGNC Symbol;Acc:VGNC:34790]
80.7506	ENSBTAG00000011126	STK38	serine/threonine kinase 38 [Source:VGNC Symbol;Acc:VGNC:35399]
80.7205	ENSBTAG00000002303	GLG1	golgi glycoprotein 1 [Source:VGNC Symbol;Acc:VGNC:29398]
80.6434	ENSBTAG00000030483	KLK7	kallikrein related peptidase 7 [Source:VGNC Symbol;Acc:VGNC:30681]
80.6388	ENSBTAG00000035998	CKB	creatine kinase B [Source:VGNC Symbol;Acc:VGNC:27384]
80.6037	ENSBTAG00000005431	LMCD1	LIM and cysteine rich domains 1 [Source:VGNC Symbol;Acc:VGNC:30926]
80.5682	ENSBTAG00000006501	DCAF1	DDB1 and CUL4 associated factor 1 [Source:VGNC Symbol;Acc:VGNC:27899]
80.3603	ENSBTAG00000010030	EPHA4	EPH receptor A4 [Source:VGNC Symbol;Acc:VGNC:56106]
80.1536	ENSBTAG00000021899	PDE9A	phosphodiesterase 9A [Source:VGNC Symbol;Acc:VGNC:32688]
80.0294	ENSBTAG00000016455	CACHD1	cache domain containing 1 [Source:VGNC Symbol;Acc:VGNC:26671]
79.961	ENSBTAG00000044150	UCK2	uridine-cytidine kinase 2 [Source:VGNC Symbol;Acc:VGNC:36635]
79.8864	ENSBTAG00000053484	CTDP1	CTD phosphatase subunit 1 [Source:NCBI gene (formerly Entrezgene);Acc:100336537]
79.8601	ENSBTAG00000010626	SH3GLB2	SH3 domain containing GRB2 like, endophilin B2 [Source:VGNC Symbol;Acc:VGNC:34576]
79.8065	ENSBTAG00000009124	FEZ1	fasciculation and elongation protein zeta 1 [Source:VGNC Symbol;Acc:VGNC:28957]
79.7613	ENSBTAG00000017592	GPAT3	glycerol-3-phosphate acyltransferase 3 [Source:VGNC Symbol;Acc:VGNC:29513]
79.1694	ENSBTAG00000012909	CRABP1	cellular retinoic acid binding protein 1 [Source:VGNC Symbol;Acc:VGNC:27685]
78.8909	ENSBTAG00000000825	MRPS26	mitochondrial ribosomal protein S26 [Source:VGNC Symbol;Acc:VGNC:31666]
78.8817	ENSBTAG00000016929	HNRNPA0	heterogeneous nuclear ribonucleoprotein A0 [Source:VGNC Symbol;Acc:VGNC:52238]
78.8303	ENSBTAG00000015224	TCOF1	treacle ribosome biogenesis factor 1 [Source:VGNC Symbol;Acc:VGNC:35700]
78.7689	ENSBTAG00000013114	ZMYND8	zinc finger MYND-type containing 8 [Source:VGNC Symbol;Acc:VGNC:37206]
78.7327	ENSBTAG00000014103	SH3GL2	SH3 domain containing GRB2 like 2, endophilin A1 [Source:VGNC Symbol;Acc:VGNC:34573]
78.7105	ENSBTAG00000031846	SART3	spliceosome associated factor 3, U4/U6 recycling protein [Source:VGNC Symbol;Acc:VGNC:57216]
78.5767	ENSBTAG00000021842	FCGR2B	Fc fragment of IgG receptor IIb [Source:NCBI gene (formerly Entrezgene);Acc:282229]
78.5691	ENSBTAG00000014880	ENSBTAG00000014880	inducible T cell costimulator ligand [Source:NCBI gene (formerly Entrezgene);Acc:507857]
78.4558	ENSBTAG00000026275	CCL24	C-C motif chemokine ligand 24 [Source:VGNC Symbol;Acc:VGNC:26950]
78.0015	ENSBTAG00000014832	TMEFF2	transmembrane protein with EGF like and two follistatin like domains 2 [Source:VGNC Symbol;Acc:VGNC:35940]
77.9074	ENSBTAG00000014471	PALM2	paralemmin 2 [Source:VGNC Symbol;Acc:VGNC:56978]
77.6242	ENSBTAG00000021093	RPS16	ribosomal protein S16 [Source:NCBI gene (formerly Entrezgene);Acc:506297]
77.4785	ENSBTAG00000003773	SLC25A13	solute carrier family 25 member 13 [Source:VGNC Symbol;Acc:VGNC:34744]
77.4595	ENSBTAG00000016165	KRT7	keratin 7 [Source:VGNC Symbol;Acc:VGNC:30734]
77.4014	ENSBTAG00000004328	CHST10	carbohydrate sulfotransferase 10 [Source:VGNC Symbol;Acc:VGNC:27338]
77.3747	ENSBTAG00000016312	LGALS4	galectin 4 [Source:VGNC Symbol;Acc:VGNC:30854]
77.247	ENSBTAG00000052516	CDA	cytidine deaminase [Source:NCBI gene (formerly Entrezgene);Acc:616377]
77.1576	ENSBTAG00000014130	MGC148714	cytochrome c oxidase subunit 6C [Source:NCBI gene (formerly Entrezgene);Acc:614700]
76.8153	ENSBTAG00000004036	GJC1	gap junction protein gamma 1 [Source:VGNC Symbol;Acc:VGNC:29382]
76.7602	ENSBTAG00000010786	TACC2	transforming acidic coiled-coil containing protein 2 [Source:VGNC Symbol;Acc:VGNC:35558]
76.7384	ENSBTAG00000002624	PSTPIP2	proline-serine-threonine phosphatase interacting protein 2 [Source:VGNC Symbol;Acc:VGNC:33487]
76.644	ENSBTAG00000001257	AGTPBP1	ATP/GTP binding protein 1 [Source:VGNC Symbol;Acc:VGNC:25744]
76.4948	ENSBTAG00000005730	GPAT4	glycerol-3-phosphate acyltransferase 4 [Source:NCBI gene (formerly Entrezgene);Acc:511614]
76.3792	ENSBTAG00000015228	CD74	CD74 molecule [Source:VGNC Symbol;Acc:VGNC:52227]
76.3674	ENSBTAG00000001927	ATP6V1C2	ATPase H+ transporting V1 subunit C2 [Source:VGNC Symbol;Acc:VGNC:26320]
76.3471	ENSBTAG00000038283	TMEM243	transmembrane protein 243 [Source:VGNC Symbol;Acc:VGNC:36054]
76.262	ENSBTAG00000004038	ABAT	4-aminobutyrate aminotransferase [Source:VGNC Symbol;Acc:VGNC:25454]
76.2175	ENSBTAG00000019967	RASA3	RAS p21 protein activator 3 [Source:VGNC Symbol;Acc:VGNC:33737]
76.0717	ENSBTAG00000009841	CNDP2	carnosine dipeptidase 2 [Source:VGNC Symbol;Acc:VGNC:27494]
76.0701	ENSBTAG00000019780	USP5	ubiquitin specific peptidase 5 [Source:VGNC Symbol;Acc:VGNC:36735]
76.019	ENSBTAG00000017147	AK3	adenylate kinase 3 [Source:VGNC Symbol;Acc:VGNC:25772]
75.9674	ENSBTAG00000000429	DGCR2	DiGeorge syndrome critical region gene 2 [Source:NCBI gene (formerly Entrezgene);Acc:767971]
75.8531	ENSBTAG00000047362	RCN1	reticulocalbin 1 [Source:VGNC Symbol;Acc:VGNC:33831]
75.6666	ENSBTAG00000040367	ENSBTAG00000040367
74.896	ENSBTAG00000001294	PPP1R15A	protein phosphatase 1 regulatory subunit 15A [Source:VGNC Symbol;Acc:VGNC:33228]
74.8161	ENSBTAG00000020584	IFT81	intraflagellar transport 81 [Source:VGNC Symbol;Acc:VGNC:30073]
74.5151	ENSBTAG00000002444	MKI67	marker of proliferation Ki-67 [Source:VGNC Symbol;Acc:VGNC:55960]
74.4958	ENSBTAG00000001698	CHTF8	Bos taurus DERPC proline and glycine rich nuclear protein (DERPC), transcript variant 1, mRNA. [Source:RefSeq mRNA;Acc:NM_001378392]
74.4918	ENSBTAG00000005892	ZAP70	zeta chain of T cell receptor associated protein kinase 70 [Source:VGNC Symbol;Acc:VGNC:37050]
74.3839	ENSBTAG00000019220	SMARCA4	SWI/SNF related, matrix associated, actin dependent regulator of chromatin, subfamily a, member 4 [Source:VGNC Symbol;Acc:VGNC:34987]
74.1803	ENSBTAG00000015724	BPIFB1	BPI fold containing family B member 1 [Source:VGNC Symbol;Acc:VGNC:26545]
74.1033	ENSBTAG00000013485	ZFYVE19	zinc finger FYVE-type containing 19 [Source:VGNC Symbol;Acc:VGNC:37175]
74.0363	ENSBTAG00000011102	TPCN1	two pore segment channel 1 [Source:VGNC Symbol;Acc:VGNC:36243]
73.9977	ENSBTAG00000003052	PCSK7	proprotein convertase subtilisin/kexin type 7 [Source:VGNC Symbol;Acc:VGNC:32649]
73.8644	ENSBTAG00000021964	CDH17	cadherin 17 [Source:VGNC Symbol;Acc:VGNC:27096]
73.5982	ENSBTAG00000019703	PRPS1	phosphoribosyl pyrophosphate synthetase 1 [Source:VGNC Symbol;Acc:VGNC:53800]
73.4979	ENSBTAG00000006561	RASGEF1B	RasGEF domain family member 1B [Source:VGNC Symbol;Acc:VGNC:33744]
73.4772	ENSBTAG00000016726	KIF15	kinesin family member 15 [Source:VGNC Symbol;Acc:VGNC:30584]
73.2463	ENSBTAG00000013277	CCDC22	coiled-coil domain containing 22 [Source:VGNC Symbol;Acc:VGNC:26886]
73.1962	ENSBTAG00000000060	PRDM14	PR/SET domain 14 [Source:VGNC Symbol;Acc:VGNC:33292]
73.1927	ENSBTAG00000007935	CALCOCO2	calcium binding and coiled-coil domain 2 [Source:VGNC Symbol;Acc:VGNC:26703]
73.181	ENSBTAG00000003212	NNAT	neuronatin [Source:VGNC Symbol;Acc:VGNC:32142]
73.0333	ENSBTAG00000000448	BDH1	3-hydroxybutyrate dehydrogenase 1 [Source:VGNC Symbol;Acc:VGNC:26457]
73.0284	ENSBTAG00000052306	IFITM3	interferon induced transmembrane protein 3 [Source:NCBI gene (formerly Entrezgene);Acc:777594]
72.5982	ENSBTAG00000007850	ITIH4	inter-alpha-trypsin inhibitor heavy chain 4 [Source:VGNC Symbol;Acc:VGNC:30336]
72.2058	ENSBTAG00000003458	CDCA7	cell division cycle associated 7 [Source:VGNC Symbol;Acc:VGNC:27086]
72.1772	ENSBTAG00000034998	SIMC1	SUMO interacting motifs containing 1 [Source:VGNC Symbol;Acc:VGNC:54482]
72.0874	ENSBTAG00000027059	ARPIN	actin related protein 2/3 complex inhibitor [Source:NCBI gene (formerly Entrezgene);Acc:613997]
72.0342	ENSBTAG00000007142	CPPED1	calcineurin like phosphoesterase domain containing 1 [Source:NCBI gene (formerly Entrezgene);Acc:537938]
71.8791	ENSBTAG00000003349	JAKMIP2	janus kinase and microtubule interacting protein 2 [Source:VGNC Symbol;Acc:VGNC:30368]
71.8278	ENSBTAG00000001835	GJA1	gap junction protein alpha 1 [Source:VGNC Symbol;Acc:VGNC:29370]
71.674	ENSBTAG00000001360	RPS12	ribosomal protein S12 [Source:VGNC Symbol;Acc:VGNC:56365]
71.4868	ENSBTAG00000000653	PPP1R16B	protein phosphatase 1 regulatory subunit 16B [Source:VGNC Symbol;Acc:VGNC:33231]
71.3166	ENSBTAG00000002084	UNC5C	unc-5 netrin receptor C [Source:VGNC Symbol;Acc:VGNC:36672]
71.1399	ENSBTAG00000019821	DHX9	DExH-box helicase 9 [Source:VGNC Symbol;Acc:VGNC:28060]
71.1185	ENSBTAG00000020696	HECW2	HECT, C2 and WW domain containing E3 ubiquitin protein ligase 2 [Source:VGNC Symbol;Acc:VGNC:56116]
70.9408	ENSBTAG00000020944	PIEZO1	piezo type mechanosensitive ion channel component 1 [Source:VGNC Symbol;Acc:VGNC:32864]
70.9149	ENSBTAG00000000758	PACC1	proton activated chloride channel 1 [Source:VGNC Symbol;Acc:VGNC:36028]
70.6025	ENSBTAG00000003622	ZKSCAN7	zinc finger with KRAB and SCAN domains 7 [Source:NCBI gene (formerly Entrezgene);Acc:539552]
70.061	ENSBTAG00000013489	CYP27A1	cytochrome P450, family 27, subfamily A, polypeptide 1 [Source:NCBI gene (formerly Entrezgene);Acc:511960]
70.0239	ENSBTAG00000005466	ENSBTAG00000005466	chromosome 8 C8orf58 homolog [Source:NCBI gene (formerly Entrezgene);Acc:101902190]

## Sheet: dimension2_negatively 
Axis2	Gene stable ID	Gene name	Gene description
-99.9999	ENSBTAG00000009353	EVI2B	ecotropic viral integration site 2B [Source:VGNC Symbol;Acc:VGNC:55822]
-99.9994	ENSBTAG00000015355	PHKA2	phosphorylase kinase regulatory subunit alpha 2 [Source:VGNC Symbol;Acc:VGNC:32831]
-99.9951	ENSBTAG00000053237	ENSBTAG00000053237
-99.9942	ENSBTAG00000011424	TPM2	tropomyosin 2 [Source:VGNC Symbol;Acc:VGNC:36252]
-99.9926	ENSBTAG00000009523	SLC9A6	solute carrier family 9 member A6 [Source:VGNC Symbol;Acc:VGNC:34945]
-99.9832	ENSBTAG00000008091	SELENBP1	selenium binding protein 1 [Source:VGNC Symbol;Acc:VGNC:34422]
-99.9754	ENSBTAG00000011839	HMGCS1	3-hydroxy-3-methylglutaryl-CoA synthase 1 [Source:VGNC Symbol;Acc:VGNC:29880]
-99.9712	ENSBTAG00000013971	PI4KA	phosphatidylinositol 4-kinase alpha [Source:VGNC Symbol;Acc:VGNC:56989]
-99.9698	ENSBTAG00000011068	MON2	MON2 homolog, regulator of endosome-to-Golgi trafficking [Source:VGNC Symbol;Acc:VGNC:31553]
-99.9568	ENSBTAG00000024801	RANBP17	RAN binding protein 17 [Source:VGNC Symbol;Acc:VGNC:57359]
-99.9566	ENSBTAG00000047954	ZNF75D	zinc finger protein 75D [Source:NCBI gene (formerly Entrezgene);Acc:100125581]
-99.9465	ENSBTAG00000012413	FGF12	fibroblast growth factor 12 [Source:VGNC Symbol;Acc:VGNC:53568]
-99.9345	ENSBTAG00000039839	IL36RN	interleukin 36 receptor antagonist [Source:VGNC Symbol;Acc:VGNC:30159]
-99.9331	ENSBTAG00000004190	ARHGAP29	Rho GTPase activating protein 29 [Source:VGNC Symbol;Acc:VGNC:26087]
-99.9217	ENSBTAG00000025964	MAST4	microtubule associated serine/threonine kinase family member 4 [Source:VGNC Symbol;Acc:VGNC:58387]
-99.9214	ENSBTAG00000020589	ENTPD1	ectonucleoside triphosphate diphosphohydrolase 1 [Source:VGNC Symbol;Acc:VGNC:97269]
-99.9156	ENSBTAG00000002942	SLC2A10	solute carrier family 2 member 10 [Source:VGNC Symbol;Acc:VGNC:34797]
-99.8989	ENSBTAG00000001729	DUSP10	dual specificity phosphatase 10 [Source:VGNC Symbol;Acc:VGNC:28249]
-99.8483	ENSBTAG00000004720	SULF1	sulfatase 1 [Source:VGNC Symbol;Acc:VGNC:53880]
-99.8443	ENSBTAG00000027875	CCDC141	coiled-coil domain containing 141 [Source:VGNC Symbol;Acc:VGNC:26852]
-99.8336	ENSBTAG00000008596	PRICKLE1	prickle planar cell polarity protein 1 [Source:VGNC Symbol;Acc:VGNC:33315]
-99.8159	ENSBTAG00000003366	DDX58	DExD/H-box helicase 58 [Source:VGNC Symbol;Acc:VGNC:27979]
-99.8129	ENSBTAG00000011975	SERPINB1	serpin family B member 1 [Source:VGNC Symbol;Acc:VGNC:34470]
-99.8062	ENSBTAG00000020406	GPC3	glypican 3 [Source:VGNC Symbol;Acc:VGNC:29525]
-99.8018	ENSBTAG00000010579	ACADL	acyl-CoA dehydrogenase long chain [Source:VGNC Symbol;Acc:VGNC:25523]
-99.7942	ENSBTAG00000018031	PODXL2	podocalyxin like 2 [Source:VGNC Symbol;Acc:VGNC:33103]
-99.7698	ENSBTAG00000021935	ELMOD3	ELMO domain containing 3 [Source:VGNC Symbol;Acc:VGNC:28443]
-99.7068	ENSBTAG00000030913	MX1	MX dynamin like GTPase 1 [Source:VGNC Symbol;Acc:VGNC:31770]
-99.7057	ENSBTAG00000014614	ACTA2	actin alpha 2, smooth muscle [Source:NCBI gene (formerly Entrezgene);Acc:515610]
-99.6696	ENSBTAG00000018438	RRAGD	Ras related GTP binding D [Source:VGNC Symbol;Acc:VGNC:34161]
-99.6563	ENSBTAG00000014615	SLC26A2	solute carrier family 26 member 2 [Source:VGNC Symbol;Acc:VGNC:34777]
-99.6522	ENSBTAG00000007245	IFT140	intraflagellar transport 140 [Source:VGNC Symbol;Acc:VGNC:30065]
-99.6478	ENSBTAG00000002451	TTC39A	tetratricopeptide repeat domain 39A [Source:VGNC Symbol;Acc:VGNC:36475]
-99.6457	ENSBTAG00000011936	ATP8B4	ATPase phospholipid transporting 8B4 (putative) [Source:NCBI gene (formerly Entrezgene);Acc:100137953]
-99.6252	ENSBTAG00000003049	MICALL2	MICAL like 2 [Source:VGNC Symbol;Acc:VGNC:31460]
-99.6068	ENSBTAG00000039035	HSPA6	heat shock protein family A (Hsp70) member 6 [Source:VGNC Symbol;Acc:VGNC:55236]
-99.5996	ENSBTAG00000002037	ATXN7L1	ataxin 7 like 1 [Source:VGNC Symbol;Acc:VGNC:26343]
-99.5509	ENSBTAG00000011190	FLNA	filamin A [Source:VGNC Symbol;Acc:VGNC:29033]
-99.5418	ENSBTAG00000046612	ZNF292	zinc finger protein 292 [Source:VGNC Symbol;Acc:VGNC:37239]
-99.504	ENSBTAG00000006326	ALDH1L2	aldehyde dehydrogenase 1 family member L2 [Source:VGNC Symbol;Acc:VGNC:25812]
-99.4525	ENSBTAG00000000642	INTS1	integrator complex subunit 1 [Source:VGNC Symbol;Acc:VGNC:30223]
-99.4256	ENSBTAG00000010082	COL15A1	collagen type XV alpha 1 chain [Source:VGNC Symbol;Acc:VGNC:27556]
-99.3881	ENSBTAG00000050197	C10orf99	chromosome 28 C10orf99 homolog [Source:NCBI gene (formerly Entrezgene);Acc:100336125]
-99.3814	ENSBTAG00000013184	CEP120	centrosomal protein 120 [Source:VGNC Symbol;Acc:VGNC:27191]
-99.3613	ENSBTAG00000014713	RARRES1	retinoic acid receptor responder 1 [Source:VGNC Symbol;Acc:VGNC:33731]
-99.3434	ENSBTAG00000004899	ABLIM1	actin binding LIM protein 1 [Source:VGNC Symbol;Acc:VGNC:55931]
-99.3049	ENSBTAG00000011200	ZNF644	zinc finger protein 644 [Source:VGNC Symbol;Acc:VGNC:37320]
-99.2713	ENSBTAG00000015044	CARD10	caspase recruitment domain family member 10 [Source:VGNC Symbol;Acc:VGNC:26760]
-99.2674	ENSBTAG00000017864	PRPH	peripherin [Source:VGNC Symbol;Acc:VGNC:33384]
-99.2608	ENSBTAG00000005133	ANKS6	ankyrin repeat and sterile alpha motif domain containing 6 [Source:VGNC Symbol;Acc:VGNC:25947]
-99.2557	ENSBTAG00000004303	SLC27A2	solute carrier family 27 member 2 [Source:VGNC Symbol;Acc:VGNC:34786]
-99.2501	ENSBTAG00000012252	MOCOS	molybdenum cofactor sulfurase [Source:VGNC Symbol;Acc:VGNC:31547]
-99.2307	ENSBTAG00000022155	FSTL1	follistatin like 1 [Source:VGNC Symbol;Acc:VGNC:29135]
-99.2127	ENSBTAG00000008079	NRBP2	nuclear receptor binding protein 2 [Source:VGNC Symbol;Acc:VGNC:32256]
-99.1866	ENSBTAG00000002082	MARCKS	myristoylated alanine rich protein kinase C substrate [Source:VGNC Symbol;Acc:VGNC:31244]
-99.1541	ENSBTAG00000031967	AMPH	amphiphysin [Source:VGNC Symbol;Acc:VGNC:25875]
-99.1055	ENSBTAG00000015749	STEAP1	STEAP family member 1 [Source:NCBI gene (formerly Entrezgene);Acc:515156]
-99.0492	ENSBTAG00000018578	LOXL3	lysyl oxidase like 3 [Source:VGNC Symbol;Acc:VGNC:30954]
-98.9905	ENSBTAG00000008470	MPHOSPH9	M-phase phosphoprotein 9 [Source:VGNC Symbol;Acc:VGNC:31576]
-98.9567	ENSBTAG00000046337	TUBB6	tubulin beta 6 class V [Source:VGNC Symbol;Acc:VGNC:36509]
-98.937	ENSBTAG00000014405	OSBPL6	oxysterol binding protein like 6 [Source:VGNC Symbol;Acc:VGNC:32464]
-98.8565	ENSBTAG00000049906	ENSBTAG00000049906	serpin peptidase inhibitor, clade B (ovalbumin), member 6-like [Source:NCBI gene (formerly Entrezgene);Acc:617406]
-98.7361	ENSBTAG00000050986	PXDN	peroxidasin [Source:NCBI gene (formerly Entrezgene);Acc:515860]
-98.6556	ENSBTAG00000009694	PUS10	pseudouridine synthase 10 [Source:VGNC Symbol;Acc:VGNC:33575]
-98.6302	ENSBTAG00000001839	OCIAD2	OCIA domain containing 2 [Source:VGNC Symbol;Acc:VGNC:32396]
-98.5892	ENSBTAG00000049158	ZNF596	zinc finger protein 596 [Source:NCBI gene (formerly Entrezgene);Acc:511959]
-98.4971	ENSBTAG00000016661	USP18	ubiquitin specific peptidase 18 [Source:NCBI gene (formerly Entrezgene);Acc:515202]
-98.4333	ENSBTAG00000051030	ENSBTAG00000051030	cytochrome P450, family 2, subfamily J, polypeptide 2 [Source:NCBI gene (formerly Entrezgene);Acc:510406]
-98.3376	ENSBTAG00000009265	NR5A2	nuclear receptor subfamily 5 group A member 2 [Source:VGNC Symbol;Acc:VGNC:32249]
-98.3341	ENSBTAG00000002236	TRPC4AP	transient receptor potential cation channel subfamily C member 4 associated protein [Source:VGNC Symbol;Acc:VGNC:36384]
-98.2504	ENSBTAG00000005810	PDZK1	PDZ domain containing 1 [Source:VGNC Symbol;Acc:VGNC:55652]
-98.2008	ENSBTAG00000003300	MFGE8	milk fat globule EGF and factor V/VIII domain containing [Source:VGNC Symbol;Acc:VGNC:31426]
-98.0953	ENSBTAG00000000242	ENSBTAG00000000242
-98.0538	ENSBTAG00000027525	ENSBTAG00000027525	nucleosome assembly protein 1-like 1 [Source:NCBI gene (formerly Entrezgene);Acc:112441545]
-98.0535	ENSBTAG00000003392	GABRA5	gamma-aminobutyric acid type A receptor subunit alpha5 [Source:VGNC Symbol;Acc:VGNC:29194]
-97.8071	ENSBTAG00000000184	EIF2AK3	eukaryotic translation initiation factor 2 alpha kinase 3 [Source:VGNC Symbol;Acc:VGNC:28382]
-97.7095	ENSBTAG00000021020	RIF1	replication timing regulatory factor 1 [Source:VGNC Symbol;Acc:VGNC:33965]
-97.5274	ENSBTAG00000011964	DIS3L2	DIS3 like 3'-5' exoribonuclease 2 [Source:VGNC Symbol;Acc:VGNC:28074]
-97.4268	ENSBTAG00000009431	SLC25A44	solute carrier family 25 member 44 [Source:VGNC Symbol;Acc:VGNC:34769]
-97.3835	ENSBTAG00000011930	DDX54	DEAD-box helicase 54 [Source:VGNC Symbol;Acc:VGNC:27976]
-97.3714	ENSBTAG00000015505	FADS2	fatty acid desaturase 2 [Source:VGNC Symbol;Acc:VGNC:28702]
-97.3366	ENSBTAG00000020573	SCUBE2	signal peptide, CUB domain and EGF like domain containing 2 [Source:VGNC Symbol;Acc:VGNC:34372]
-97.2921	ENSBTAG00000017112	CDYL2	chromodomain Y like 2 [Source:VGNC Symbol;Acc:VGNC:27160]
-97.2494	ENSBTAG00000020250	SLC28A1	solute carrier family 28 member 1 [Source:VGNC Symbol;Acc:VGNC:34791]
-97.2282	ENSBTAG00000021707	MYBPC3	myosin binding protein C3 [Source:VGNC Symbol;Acc:VGNC:31781]
-97.0437	ENSBTAG00000046350	PKP1	plakophilin 1 [Source:VGNC Symbol;Acc:VGNC:97302]
-97.0077	ENSBTAG00000003384	CEP162	centrosomal protein 162 [Source:VGNC Symbol;Acc:VGNC:27195]
-97.0022	ENSBTAG00000019892	HAS2	hyaluronan synthase 2 [Source:VGNC Symbol;Acc:VGNC:29755]
-96.9468	ENSBTAG00000018993	ITGB7	integrin subunit beta 7 [Source:VGNC Symbol;Acc:VGNC:30332]
-96.8196	ENSBTAG00000016782	SLC39A10	solute carrier family 39 member 10 [Source:VGNC Symbol;Acc:VGNC:34858]
-96.6616	ENSBTAG00000018334	PLAGL2	PLAG1 like zinc finger 2 [Source:VGNC Symbol;Acc:VGNC:32973]
-96.5573	ENSBTAG00000007794	KRT20	keratin 20 [Source:VGNC Symbol;Acc:VGNC:50399]
-96.3675	ENSBTAG00000010976	KANK1	KN motif and ankyrin repeat domains 1 [Source:VGNC Symbol;Acc:VGNC:56976]
-96.2052	ENSBTAG00000018644	PDZRN3	PDZ domain containing ring finger 3 [Source:VGNC Symbol;Acc:VGNC:32731]
-96.1749	ENSBTAG00000046152	MGAM	maltase-glucoamylase [Source:VGNC Symbol;Acc:VGNC:31446]
-96.1026	ENSBTAG00000000253	PTPRF	protein tyrosine phosphatase receptor type F [Source:VGNC Symbol;Acc:VGNC:33550]
-95.8196	ENSBTAG00000013145	DDHD2	DDHD domain containing 2 [Source:VGNC Symbol;Acc:VGNC:27944]
-95.7985	ENSBTAG00000013462	L1CAM	L1 cell adhesion molecule [Source:VGNC Symbol;Acc:VGNC:30760]
-95.5807	ENSBTAG00000010382	MUC13	mucin 13, cell surface associated [Source:VGNC Symbol;Acc:VGNC:31758]
-95.37	ENSBTAG00000020296	UBR3	ubiquitin protein ligase E3 component n-recognin 3 [Source:VGNC Symbol;Acc:VGNC:55173]
-95.2922	ENSBTAG00000039046	CD24	CD24 molecule [Source:VGNC Symbol;Acc:VGNC:27014]
-95.1779	ENSBTAG00000020856	HFM1	helicase for meiosis 1 [Source:VGNC Symbol;Acc:VGNC:29832]
-95.1214	ENSBTAG00000016694	KIAA0319L	KIAA0319 like [Source:VGNC Symbol;Acc:VGNC:30549]
-95.1113	ENSBTAG00000013178	ALAS2	5'-aminolevulinate synthase 2 [Source:VGNC Symbol;Acc:VGNC:25804]
-95.0389	ENSBTAG00000046026	SLC39A4	solute carrier family 39 member 4 [Source:VGNC Symbol;Acc:VGNC:34864]
-94.8135	ENSBTAG00000005773	PGM2	phosphoglucomutase 2 [Source:VGNC Symbol;Acc:VGNC:32794]
-94.6808	ENSBTAG00000016903	NLN	neurolysin [Source:VGNC Symbol;Acc:VGNC:97293]
-94.4605	ENSBTAG00000001303	HSPB8	heat shock protein family B (small) member 8 [Source:VGNC Symbol;Acc:VGNC:53907]
-94.2504	ENSBTAG00000006837	UBA6	ubiquitin like modifier activating enzyme 6 [Source:VGNC Symbol;Acc:VGNC:36565]
-94.1925	ENSBTAG00000020608	ATG9A	autophagy related 9A [Source:VGNC Symbol;Acc:VGNC:26262]
-94.1585	ENSBTAG00000012999	PRDM4	PR/SET domain 4 [Source:VGNC Symbol;Acc:VGNC:33296]
-94.1376	ENSBTAG00000007239	TNFAIP6	TNF alpha induced protein 6 [Source:VGNC Symbol;Acc:VGNC:36156]
-94.1332	ENSBTAG00000016359	SLCO4C1	solute carrier organic anion transporter family member 4C1 [Source:VGNC Symbol;Acc:VGNC:34955]
-94.0239	ENSBTAG00000015571	GCLC	glutamate-cysteine ligase catalytic subunit [Source:VGNC Symbol;Acc:VGNC:29289]
-93.9723	ENSBTAG00000017056	PKLR	pyruvate kinase L/R [Source:VGNC Symbol;Acc:VGNC:32943]
-93.9304	ENSBTAG00000050562	ENSBTAG00000050562
-93.6812	ENSBTAG00000005377	SOSTDC1	sclerostin domain containing 1 [Source:VGNC Symbol;Acc:VGNC:35136]
-93.6015	ENSBTAG00000020270	NFKB1	nuclear factor kappa B subunit 1 [Source:VGNC Symbol;Acc:VGNC:32043]
-93.595	ENSBTAG00000018160	LAMA1	laminin subunit alpha 1 [Source:VGNC Symbol;Acc:VGNC:30769]
-93.4744	ENSBTAG00000022733	EPM2AIP1	EPM2A interacting protein 1 [Source:VGNC Symbol;Acc:VGNC:28545]
-93.4293	ENSBTAG00000002227	LRIG3	leucine rich repeats and immunoglobulin like domains 3 [Source:VGNC Symbol;Acc:VGNC:30984]
-93.4196	ENSBTAG00000015462	BNC1	basonuclin 1 [Source:VGNC Symbol;Acc:VGNC:26530]
-93.3583	ENSBTAG00000008084	ZNF382	zinc finger protein 382 [Source:VGNC Symbol;Acc:VGNC:37261]
-93.07	ENSBTAG00000003668	RADX	RPA1 related single stranded DNA binding protein, X-linked [Source:VGNC Symbol;Acc:VGNC:52760]
-93.0496	ENSBTAG00000002214	TAT	tyrosine aminotransferase [Source:VGNC Symbol;Acc:VGNC:35616]
-92.8587	ENSBTAG00000021294	VWA1	von Willebrand factor A domain containing 1 [Source:VGNC Symbol;Acc:VGNC:36850]
-92.8441	ENSBTAG00000017007	TRIB3	tribbles pseudokinase 3 [Source:VGNC Symbol;Acc:VGNC:36310]
-92.8398	ENSBTAG00000011105	SLC38A2	solute carrier family 38 member 2 [Source:VGNC Symbol;Acc:VGNC:34849]
-92.7093	ENSBTAG00000019226	PAG8	pregnancy-associated glycoprotein 8 [Source:NCBI gene (formerly Entrezgene);Acc:337902]
-92.6491	ENSBTAG00000027426	ENSBTAG00000027426
-92.5378	ENSBTAG00000008129	CLSTN3	calsyntenin 3 [Source:VGNC Symbol;Acc:VGNC:27468]
-92.3706	ENSBTAG00000005260	SPP1	secreted phosphoprotein 1 [Source:VGNC Symbol;Acc:VGNC:35232]
-92.2297	ENSBTAG00000020363	GBA3	glucosylceramidase beta 3 [Source:VGNC Symbol;Acc:VGNC:56338]
-92.0491	ENSBTAG00000013496	CPM	carboxypeptidase M [Source:VGNC Symbol;Acc:VGNC:27655]
-92.0183	ENSBTAG00000014138	MTM1	myotubularin 1 [Source:VGNC Symbol;Acc:VGNC:31735]
-91.858	ENSBTAG00000011358	IER3	immediate early response 3 [Source:VGNC Symbol;Acc:VGNC:30039]
-91.8242	ENSBTAG00000020420	AP1S2	adaptor related protein complex 1 subunit sigma 2 [Source:VGNC Symbol;Acc:VGNC:50199]
-91.745	ENSBTAG00000001941	SEMA4D	semaphorin 4D [Source:VGNC Symbol;Acc:VGNC:34436]
-91.7101	ENSBTAG00000006991	ADH6	alcohol dehydrogenase 6 (class V) [Source:NCBI gene (formerly Entrezgene);Acc:510551]
-91.6895	ENSBTAG00000008411	PLEKHO2	pleckstrin homology domain containing O2 [Source:NCBI gene (formerly Entrezgene);Acc:613696]
-91.5862	ENSBTAG00000011043	RAC2	Rac family small GTPase 2 [Source:VGNC Symbol;Acc:VGNC:49061]
-91.5457	ENSBTAG00000046332	ACTA1	actin alpha 1, skeletal muscle [Source:VGNC Symbol;Acc:VGNC:25573]
-91.3302	ENSBTAG00000001295	DEPDC5	DEP domain containing 5, GATOR1 subcomplex subunit [Source:VGNC Symbol;Acc:VGNC:28006]
-91.3298	ENSBTAG00000010841	FMO5	flavin containing dimethylaniline monoxygenase 5 [Source:VGNC Symbol;Acc:VGNC:29053]
-91.3213	ENSBTAG00000013392	PLD2	phospholipase D2 [Source:VGNC Symbol;Acc:VGNC:32996]
-91.2556	ENSBTAG00000013018	AMPD2	adenosine monophosphate deaminase 2 [Source:VGNC Symbol;Acc:VGNC:25874]
-91.1913	ENSBTAG00000003763	MYO5C	myosin VC [Source:VGNC Symbol;Acc:VGNC:31828]
-91.086	ENSBTAG00000020418	CA5B	carbonic anhydrase 5B [Source:VGNC Symbol;Acc:VGNC:26655]
-90.6907	ENSBTAG00000019036	ARHGAP28	Rho GTPase activating protein 28 [Source:VGNC Symbol;Acc:VGNC:26086]
-90.6519	ENSBTAG00000013856	SSBP2	single stranded DNA binding protein 2 [Source:VGNC Symbol;Acc:VGNC:50023]
-90.4649	ENSBTAG00000038141	ADGRG1	adhesion G protein-coupled receptor G1 [Source:VGNC Symbol;Acc:VGNC:97236]
-90.2829	ENSBTAG00000005294	ENSBTAG00000005294
-89.9518	ENSBTAG00000002854	TMEM63A	transmembrane protein 63A [Source:VGNC Symbol;Acc:VGNC:36103]
-89.9455	ENSBTAG00000002289	NLRP14	NLR family pyrin domain containing 14 [Source:VGNC Symbol;Acc:VGNC:32116]
-89.7141	ENSBTAG00000006987	CERS3	ceramide synthase 3 [Source:VGNC Symbol;Acc:VGNC:27225]
-89.5431	ENSBTAG00000009475	PLXDC2	plexin domain containing 2 [Source:VGNC Symbol;Acc:VGNC:33058]
-89.0937	ENSBTAG00000046447	ENSBTAG00000046447
-89.0026	ENSBTAG00000013468	AHNAK	AHNAK nucleoprotein [Source:VGNC Symbol;Acc:VGNC:25754]
-88.9246	ENSBTAG00000008721	MANSC1	MANSC domain containing 1 [Source:VGNC Symbol;Acc:VGNC:31172]
-88.9043	ENSBTAG00000014831	PPP1R3C	protein phosphatase 1 regulatory subunit 3C [Source:VGNC Symbol;Acc:VGNC:33244]
-88.7894	ENSBTAG00000016336	OGA	O-GlcNAcase [Source:VGNC Symbol;Acc:VGNC:54465]
-88.5261	ENSBTAG00000008714	CLSTN2	calsyntenin 2 [Source:VGNC Symbol;Acc:VGNC:27467]
-88.4419	ENSBTAG00000016267	SERPING1	serpin family G member 1 [Source:VGNC Symbol;Acc:VGNC:54891]
-88.1683	ENSBTAG00000011597	PDS5B	PDS5 cohesin associated factor B [Source:VGNC Symbol;Acc:VGNC:32718]
-87.8264	ENSBTAG00000006125	PLK3	polo like kinase 3 [Source:VGNC Symbol;Acc:VGNC:33035]
-87.8262	ENSBTAG00000000936	SLC39A2	solute carrier family 39 member 2 [Source:VGNC Symbol;Acc:VGNC:34863]
-87.7143	ENSBTAG00000000738	DAPK1	death associated protein kinase 1 [Source:VGNC Symbol;Acc:VGNC:27877]
-87.2992	ENSBTAG00000048452	ENSBTAG00000048452
-87.271	ENSBTAG00000017166	C9H6orf58	chromosome 9 C6orf58 homolog [Source:VGNC Symbol;Acc:VGNC:53784]
-87.1697	ENSBTAG00000001567	LRRK1	leucine rich repeat kinase 1 [Source:VGNC Symbol;Acc:VGNC:31037]
-87.1484	ENSBTAG00000011922	PLEC	plectin [Source:VGNC Symbol;Acc:VGNC:53873]
-87.07	ENSBTAG00000010350	USP53	ubiquitin specific peptidase 53 [Source:VGNC Symbol;Acc:VGNC:58425]
-86.789	ENSBTAG00000030282	ZBED8	zinc finger BED-type containing 8 [Source:VGNC Symbol;Acc:VGNC:37055]
-86.7744	ENSBTAG00000011237	PKHD1	PKHD1 ciliary IPT domain containing fibrocystin/polyductin [Source:VGNC Symbol;Acc:VGNC:32939]
-86.6296	ENSBTAG00000008793	RNASE1	ribonuclease, RNase A family, 1 (pancreatic) [Source:NCBI gene (formerly Entrezgene);Acc:282340]
-86.4864	ENSBTAG00000013722	AARS2	alanyl-tRNA synthetase 2, mitochondrial [Source:VGNC Symbol;Acc:VGNC:25449]
-86.3481	ENSBTAG00000038275	CYP27C1	cytochrome P450, family 27, subfamily C, polypeptide 1 [Source:NCBI gene (formerly Entrezgene);Acc:617338]
-86.2067	ENSBTAG00000005979	HELLS	helicase, lymphoid specific [Source:VGNC Symbol;Acc:VGNC:29805]
-85.9014	ENSBTAG00000023970	ENSBTAG00000023970	UL16-binding protein 27-like [Source:NCBI gene (formerly Entrezgene);Acc:783508]
-85.8268	ENSBTAG00000011226	SLC4A2	solute carrier family 4 member 2 [Source:VGNC Symbol;Acc:VGNC:34892]
-85.737	ENSBTAG00000014947	PTPN13	protein tyrosine phosphatase non-receptor type 13 [Source:VGNC Symbol;Acc:VGNC:53774]
-85.3282	ENSBTAG00000020127	TKTL1	transketolase like 1 [Source:VGNC Symbol;Acc:VGNC:35885]
-84.7917	ENSBTAG00000010609	STK31	family with sequence similarity 221, member A [Source:NCBI gene (formerly Entrezgene);Acc:505226]
-84.4365	ENSBTAG00000015441	ACTG2	actin gamma 2, smooth muscle [Source:VGNC Symbol;Acc:VGNC:59201]
-84.3453	ENSBTAG00000013689	MCTP2	multiple C2 and transmembrane domain containing 2 [Source:VGNC Symbol;Acc:VGNC:31324]
-84.3376	ENSBTAG00000013475	TRAF3	TNF receptor associated factor 3 [Source:VGNC Symbol;Acc:VGNC:36272]
-84.1818	ENSBTAG00000012915	ZNF404	zinc finger protein 404 [Source:VGNC Symbol;Acc:VGNC:37268]
-83.5857	ENSBTAG00000048304	ENSBTAG00000048304	butyrophilin subfamily 1 member A1 [Source:NCBI gene (formerly Entrezgene);Acc:615223]
-83.4509	ENSBTAG00000047676	PRODH	proline dehydrogenase (oxidase) 1 [Source:NCBI gene (formerly Entrezgene);Acc:505094]
-83.1762	ENSBTAG00000013245	ITPR3	inositol 1,4,5-trisphosphate receptor type 3 [Source:VGNC Symbol;Acc:VGNC:30348]
-83.0139	ENSBTAG00000010693	LMO7	LIM domain 7 [Source:VGNC Symbol;Acc:VGNC:30937]
-82.9913	ENSBTAG00000003454	RGS20	regulator of G protein signaling 20 [Source:VGNC Symbol;Acc:VGNC:33919]
-82.6363	ENSBTAG00000012724	AJUBA	ajuba LIM protein [Source:VGNC Symbol;Acc:VGNC:25769]
-82.5519	ENSBTAG00000019546	ENSBTAG00000019546	cancer/testis antigen 55 [Source:NCBI gene (formerly Entrezgene);Acc:615884]
-82.4058	ENSBTAG00000015106	DSP	desmoplakin [Source:VGNC Symbol;Acc:VGNC:28225]
-81.9598	ENSBTAG00000026769	ASCL2	achaete-scute family bHLH transcription factor 2 [Source:VGNC Symbol;Acc:VGNC:26207]
-81.7727	ENSBTAG00000038715	ENSBTAG00000038715
-81.4745	ENSBTAG00000006241	MAN2B1	mannosidase alpha class 2B member 1 [Source:NCBI gene (formerly Entrezgene);Acc:282272]
-81.2234	ENSBTAG00000013090	NODAL	nodal growth differentiation factor [Source:VGNC Symbol;Acc:VGNC:32152]
-81.2226	ENSBTAG00000019338	IL13RA1	interleukin 13 receptor subunit alpha 1 [Source:VGNC Symbol;Acc:VGNC:55053]
-81.1998	ENSBTAG00000020041	FAM13B	family with sequence similarity 13 member B [Source:VGNC Symbol;Acc:VGNC:55222]
-81.1995	ENSBTAG00000014247	FAM83F	family with sequence similarity 83 member F [Source:VGNC Symbol;Acc:VGNC:28837]
-81.1479	ENSBTAG00000002526	BDH2	3-hydroxybutyrate dehydrogenase 2 [Source:VGNC Symbol;Acc:VGNC:26458]
-80.7847	ENSBTAG00000004208	PLEKHG6	pleckstrin homology and RhoGEF domain containing G6 [Source:VGNC Symbol;Acc:VGNC:33019]
-80.73	ENSBTAG00000005960	EPB41L2	erythrocyte membrane protein band 4.1 like 2 [Source:VGNC Symbol;Acc:VGNC:28521]
-80.6061	ENSBTAG00000020644	GPC4	glypican 4 [Source:VGNC Symbol;Acc:VGNC:29526]
-80.5026	ENSBTAG00000012954	ERAS	ES cell expressed Ras [Source:VGNC Symbol;Acc:VGNC:28562]
-80.242	ENSBTAG00000017051	ACP6	acid phosphatase 6, lysophosphatidic [Source:VGNC Symbol;Acc:VGNC:52602]
-79.7462	ENSBTAG00000032092	CDH11	cadherin 11 [Source:VGNC Symbol;Acc:VGNC:27092]
-79.6766	ENSBTAG00000013735	TBCE	tubulin folding cofactor E [Source:VGNC Symbol;Acc:VGNC:35653]
-79.5338	ENSBTAG00000016505	TMC7	transmembrane channel like 7 [Source:VGNC Symbol;Acc:VGNC:35923]
-79.5321	ENSBTAG00000009495	BCAM	basal cell adhesion molecule [Source:VGNC Symbol;Acc:VGNC:49138]
-79.4033	ENSBTAG00000006878	ENSBTAG00000006878	TATA-box binding protein associated factor 1 [Source:NCBI gene (formerly Entrezgene);Acc:785085]
-79.3716	ENSBTAG00000017281	OPLAH	5-oxoprolinase, ATP-hydrolysing [Source:VGNC Symbol;Acc:VGNC:53869]
-79.2259	ENSBTAG00000005273	IL1R1	interleukin 1 receptor type 1 [Source:VGNC Symbol;Acc:VGNC:30131]
-78.6253	ENSBTAG00000047997	PRPS2	phosphoribosyl pyrophosphate synthetase 2 [Source:VGNC Symbol;Acc:VGNC:56950]
-78.304	ENSBTAG00000011613	PLS3	plastin 3 [Source:VGNC Symbol;Acc:VGNC:33052]
-78.0433	ENSBTAG00000050790	C3H1orf226	chromosome 3 C1orf226 homolog [Source:NCBI gene (formerly Entrezgene);Acc:783439]
-77.8494	ENSBTAG00000000603	JAM2	junctional adhesion molecule 2 [Source:VGNC Symbol;Acc:VGNC:50011]
-77.4126	ENSBTAG00000032819	MUC20	mucin 20, cell surface associated [Source:VGNC Symbol;Acc:VGNC:54458]
-77.3429	ENSBTAG00000020099	STMN2	stathmin 2 [Source:VGNC Symbol;Acc:VGNC:35404]
-77.2706	ENSBTAG00000038486	B3GNT10	putative UDP-GlcNAc:betaGal beta-1,3-N-acetylglucosaminyltransferase LOC100288842 [Source:NCBI gene (formerly Entrezgene);Acc:101904668]
-77.1825	ENSBTAG00000009230	FBLN7	fibulin 7 [Source:VGNC Symbol;Acc:VGNC:28884]
-77.0172	ENSBTAG00000048655	NT5E	5'-nucleotidase ecto [Source:NCBI gene (formerly Entrezgene);Acc:281363]
-76.95	ENSBTAG00000000586	CPLANE1	ciliogenesis and planar polarity effector 1 [Source:VGNC Symbol;Acc:VGNC:59329]
-76.9322	ENSBTAG00000021343	ARHGEF12	Rho guanine nucleotide exchange factor 12 [Source:VGNC Symbol;Acc:VGNC:26106]
-76.344	ENSBTAG00000047572	ZNF789	zinc finger protein 789 [Source:VGNC Symbol;Acc:VGNC:37346]
-76.1771	ENSBTAG00000000945	ATP2C2	ATPase secretory pathway Ca2+ transporting 2 [Source:VGNC Symbol;Acc:VGNC:26297]
-76.0667	ENSBTAG00000007860	ASPM	assembly factor for spindle microtubules [Source:NCBI gene (formerly Entrezgene);Acc:534849]
-75.8264	ENSBTAG00000002075	MME	membrane metalloendopeptidase [Source:VGNC Symbol;Acc:VGNC:31514]
-75.7099	ENSBTAG00000026586	PPP1R14C	protein phosphatase 1 regulatory inhibitor subunit 14C [Source:VGNC Symbol;Acc:VGNC:33227]
-75.45	ENSBTAG00000004147	FBH1	F-box DNA helicase 1 [Source:VGNC Symbol;Acc:VGNC:28896]
-75.3006	ENSBTAG00000016775	SLC27A1	solute carrier family 27 member 1 [Source:VGNC Symbol;Acc:VGNC:34785]
-75.257	ENSBTAG00000021127	GNA14	G protein subunit alpha 14 [Source:VGNC Symbol;Acc:VGNC:29447]
-75.1858	ENSBTAG00000030335	ALDH4A1	aldehyde dehydrogenase 4 family member A1 [Source:VGNC Symbol;Acc:VGNC:25815]
-75.042	ENSBTAG00000004976	CDCA7L	cell division cycle associated 7 like [Source:VGNC Symbol;Acc:VGNC:27087]
-74.9645	ENSBTAG00000045664	LRRC41	leucine rich repeat containing 41 [Source:NCBI gene (formerly Entrezgene);Acc:337889]
-74.533	ENSBTAG00000000759	NENF	neudesin neurotrophic factor [Source:VGNC Symbol;Acc:VGNC:32006]
-74.5185	ENSBTAG00000005475	TCAF2	TRPM8 channel associated factor 2 [Source:NCBI gene (formerly Entrezgene);Acc:510320]
-74.3939	ENSBTAG00000003581	SETD7	SET domain containing 7, histone lysine methyltransferase [Source:VGNC Symbol;Acc:VGNC:34497]
-74.1653	ENSBTAG00000005997	ENSBTAG00000005997	multidrug resistance protein 1 [Source:NCBI gene (formerly Entrezgene);Acc:281585]
-74.0997	ENSBTAG00000031682	ZNF484	zinc finger protein 484 [Source:VGNC Symbol;Acc:VGNC:37285]
-74.0861	ENSBTAG00000016968	CHST4	carbohydrate sulfotransferase 4 [Source:VGNC Symbol;Acc:VGNC:27346]
-74.0699	ENSBTAG00000019529	ATP8A2	ATPase, aminophospholipid transporter, class I, type 8A, member 2 [Source:NCBI gene (formerly Entrezgene);Acc:508723]
-73.9751	ENSBTAG00000046266	TNFSF9	TNF superfamily member 9 [Source:VGNC Symbol;Acc:VGNC:36178]
-73.9235	ENSBTAG00000037383	AKAP13	A-kinase anchoring protein 13 [Source:VGNC Symbol;Acc:VGNC:97238]
-73.5424	ENSBTAG00000014270	UNC5B	unc-5 netrin receptor B [Source:VGNC Symbol;Acc:VGNC:36671]
-73.4132	ENSBTAG00000012068	BRIP1	BRCA1 interacting protein C-terminal helicase 1 [Source:VGNC Symbol;Acc:VGNC:50067]
-73.2701	ENSBTAG00000013678	OSGIN2	oxidative stress induced growth inhibitor family member 2 [Source:VGNC Symbol;Acc:VGNC:32473]
-73.2146	ENSBTAG00000001000	CA13	carbonic anhydrase 13 [Source:VGNC Symbol;Acc:VGNC:26651]
-73.1989	ENSBTAG00000006031	ADGRV1	adhesion G protein-coupled receptor V1 [Source:VGNC Symbol;Acc:VGNC:25673]
-73.1937	ENSBTAG00000015936	BRINP1	BMP/retinoic acid inducible neural specific 1 [Source:VGNC Symbol;Acc:VGNC:26567]
-73.13	ENSBTAG00000011417	CNTRL	centriolin [Source:VGNC Symbol;Acc:VGNC:52755]
-73.0835	ENSBTAG00000021026	PJA1	praja ring finger ubiquitin ligase 1 [Source:NCBI gene (formerly Entrezgene);Acc:786612]
-72.8277	ENSBTAG00000017868	DHX40	DEAH-box helicase 40 [Source:VGNC Symbol;Acc:VGNC:28056]
-72.6995	ENSBTAG00000000109	NPTXR	neuronal pentraxin receptor [Source:VGNC Symbol;Acc:VGNC:32220]
-72.6188	ENSBTAG00000003626	MYO3B	myosin IIIB [Source:VGNC Symbol;Acc:VGNC:31825]
-72.2614	ENSBTAG00000031509	PFAS	phosphoribosylformylglycinamidine synthase [Source:VGNC Symbol;Acc:VGNC:32765]
-72.2227	ENSBTAG00000000371	DIS3L	DIS3 like exosome 3'-5' exoribonuclease [Source:VGNC Symbol;Acc:VGNC:28073]
-72.2182	ENSBTAG00000000292	TCIRG1	T cell immune regulator 1, ATPase H+ transporting V0 subunit a3 [Source:VGNC Symbol;Acc:VGNC:56298]
-71.8526	ENSBTAG00000009948	TRIM25	tripartite motif containing 25 [Source:VGNC Symbol;Acc:VGNC:36322]
-71.7556	ENSBTAG00000005842	ABCC10	ATP binding cassette subfamily C member 10 [Source:VGNC Symbol;Acc:VGNC:25469]
-71.6926	ENSBTAG00000003833	SLC35G2	solute carrier family 35 member G2 [Source:VGNC Symbol;Acc:VGNC:34837]
-71.6882	ENSBTAG00000009786	SCIN	scinderin [Source:VGNC Symbol;Acc:VGNC:34339]
-71.6882	ENSBTAG00000015745	RAB3IL1	RAB3A interacting protein like 1 [Source:VGNC Symbol;Acc:VGNC:33655]
-71.6524	ENSBTAG00000033656	ENSBTAG00000033656
-71.4987	ENSBTAG00000002908	GNG4	G protein subunit gamma 4 [Source:VGNC Symbol;Acc:VGNC:29467]
-71.3186	ENSBTAG00000020283	DUSP5	dual specificity phosphatase 5 [Source:VGNC Symbol;Acc:VGNC:28261]
-71.2861	ENSBTAG00000018240	CYP2S1	cytochrome P450, family 2, subfamily S, polypeptide 1 [Source:NCBI gene (formerly Entrezgene);Acc:514971]
-71.1483	ENSBTAG00000026247	PKHD1L1	PKHD1 like 1 [Source:NCBI gene (formerly Entrezgene);Acc:100336824]
-70.946	ENSBTAG00000014975	SLC4A3	solute carrier family 4 member 3 [Source:VGNC Symbol;Acc:VGNC:34893]
-70.7428	ENSBTAG00000008173	TRIM13	tripartite motif containing 13 [Source:VGNC Symbol;Acc:VGNC:36314]
-70.5808	ENSBTAG00000004653	ADGRA3	adhesion G protein-coupled receptor A3 [Source:VGNC Symbol;Acc:VGNC:25657]
-70.5416	ENSBTAG00000018607	TSPEAR	thrombospondin type laminin G domain and EAR repeats [Source:VGNC Symbol;Acc:VGNC:36444]
-70.5028	ENSBTAG00000019315	PLA2G7	phospholipase A2 group VII [Source:VGNC Symbol;Acc:VGNC:32965]
-70.4561	ENSBTAG00000015145	S100A11	S100 calcium binding protein A11 [Source:VGNC Symbol;Acc:VGNC:34238]
-70.3319	ENSBTAG00000001324	SLCO2A1	solute carrier organic anion transporter family member 2A1 [Source:VGNC Symbol;Acc:VGNC:34951]
-70.0421	ENSBTAG00000014068	VDAC3	voltage dependent anion channel 3 [Source:NCBI gene (formerly Entrezgene);Acc:282716]

## Sheet: dimension2_positively
Axis2	Gene stable ID	Gene name	Gene description
99.9958	ENSBTAG00000011100	CTSC	cathepsin C [Source:VGNC Symbol;Acc:VGNC:27814]
99.9868	ENSBTAG00000014407	INO80D	INO80 complex subunit D [Source:VGNC Symbol;Acc:VGNC:30206]
99.982	ENSBTAG00000021368	ENSBTAG00000021368	dihydrodiol dehydrogenase 3 [Source:NCBI gene (formerly Entrezgene);Acc:782884]
99.9653	ENSBTAG00000009749	USP2	ubiquitin specific peptidase 2 [Source:VGNC Symbol;Acc:VGNC:54894]
99.9544	ENSBTAG00000007462	ASTE1	asteroid homolog 1 [Source:VGNC Symbol;Acc:VGNC:26225]
99.9527	ENSBTAG00000002417	RAB30	RAB30, member RAS oncogene family [Source:VGNC Symbol;Acc:VGNC:33639]
99.8713	ENSBTAG00000008493	AQP3	aquaporin 3 [Source:VGNC Symbol;Acc:VGNC:56935]
99.8377	ENSBTAG00000015743	GMPR	guanosine monophosphate reductase [Source:VGNC Symbol;Acc:VGNC:29442]
99.7622	ENSBTAG00000018725	FBLIM1	filamin binding LIM protein 1 [Source:VGNC Symbol;Acc:VGNC:28880]
99.7476	ENSBTAG00000012275	ENDOU	endonuclease, poly(U) specific [Source:NCBI gene (formerly Entrezgene);Acc:525399]
99.7291	ENSBTAG00000014091	ARHGEF3	Rho guanine nucleotide exchange factor 3 [Source:VGNC Symbol;Acc:VGNC:26115]
99.7241	ENSBTAG00000016272	TEX11	testis expressed 11 [Source:VGNC Symbol;Acc:VGNC:35760]
99.7231	ENSBTAG00000012296	GABRG1	gamma-aminobutyric acid type A receptor subunit gamma1 [Source:VGNC Symbol;Acc:VGNC:55048]
99.6047	ENSBTAG00000006731	SLC7A5	solute carrier family 7 member 5 [Source:VGNC Symbol;Acc:VGNC:52250]
99.5597	ENSBTAG00000000828	CAPN6	calpain 6 [Source:VGNC Symbol;Acc:VGNC:26749]
99.5136	ENSBTAG00000017155	TRIM32	tripartite motif containing 32 [Source:VGNC Symbol;Acc:VGNC:36328]
99.1606	ENSBTAG00000021874	KIF14	kinesin family member 14 [Source:VGNC Symbol;Acc:VGNC:30583]
99.1114	ENSBTAG00000048861	ENSBTAG00000048861	family with sequence similarity 151 member A [Source:NCBI gene (formerly Entrezgene);Acc:538670]
98.9922	ENSBTAG00000009904	SPIC	Spi-C transcription factor [Source:VGNC Symbol;Acc:VGNC:35214]
98.8946	ENSBTAG00000016231	POFUT1	protein O-fucosyltransferase 1 [Source:VGNC Symbol;Acc:VGNC:33105]
98.5498	ENSBTAG00000022372	ENSBTAG00000022372	protein SET-like [Source:NCBI gene (formerly Entrezgene);Acc:782688]
98.5438	ENSBTAG00000008111	ESYT3	extended synaptotagmin 3 [Source:VGNC Symbol;Acc:VGNC:28615]
98.2643	ENSBTAG00000016939	C11H2orf42	chromosome 11 C2orf42 homolog [Source:VGNC Symbol;Acc:VGNC:52614]
98.0513	ENSBTAG00000018245	SLC1A3	solute carrier family 1 member 3 [Source:VGNC Symbol;Acc:VGNC:34713]
97.815	ENSBTAG00000002717	INA	internexin neuronal intermediate filament protein alpha [Source:VGNC Symbol;Acc:VGNC:30191]
97.6283	ENSBTAG00000012695	LCK	LCK proto-oncogene, Src family tyrosine kinase [Source:VGNC Symbol;Acc:VGNC:30810]
97.5103	ENSBTAG00000000401	TTC24	tetratricopeptide repeat domain 24 [Source:VGNC Symbol;Acc:VGNC:36463]
97.2411	ENSBTAG00000053071	ENSBTAG00000053071
97.2103	ENSBTAG00000015140	RUNDC1	RUN domain containing 1 [Source:VGNC Symbol;Acc:VGNC:34217]
96.208	ENSBTAG00000000501	KLHL13	kelch like family member 13 [Source:VGNC Symbol;Acc:VGNC:30643]
96.0972	ENSBTAG00000030674	AK4	adenylate kinase 4 [Source:VGNC Symbol;Acc:VGNC:25773]
95.2999	ENSBTAG00000002025	AMIGO2	adhesion molecule with Ig like domain 2 [Source:VGNC Symbol;Acc:VGNC:25866]
94.9286	ENSBTAG00000019793	RGS22	regulator of G protein signaling 22 [Source:VGNC Symbol;Acc:VGNC:33921]
94.9067	ENSBTAG00000031582	ENSBTAG00000031582
94.7938	ENSBTAG00000008612	C1R	complement C1r [Source:VGNC Symbol;Acc:VGNC:56194]
94.746	ENSBTAG00000013919	ENSBTAG00000013919	major histocompatibility complex, class II, DRB3 [Source:NCBI gene (formerly Entrezgene);Acc:282530]
94.7204	ENSBTAG00000005717	GJB5	gap junction protein beta 5 [Source:VGNC Symbol;Acc:VGNC:29380]
94.5141	ENSBTAG00000046193	ENSBTAG00000046193
94.4152	ENSBTAG00000054195	GPX1	glutathione peroxidase 1 [Source:NCBI gene (formerly Entrezgene);Acc:281209]
93.601	ENSBTAG00000049584	ENSBTAG00000049584	melanoma-associated antigen 10-like [Source:NCBI gene (formerly Entrezgene);Acc:618806]
92.9043	ENSBTAG00000045939	ENSBTAG00000045939
92.3474	ENSBTAG00000001292	LTF	lactotransferrin [Source:VGNC Symbol;Acc:VGNC:31077]
91.7698	ENSBTAG00000015222	RSRP1	arginine and serine rich protein 1 [Source:VGNC Symbol;Acc:VGNC:50105]
91.5972	ENSBTAG00000006963	RPL12	ribosomal protein L12 [Source:NCBI gene (formerly Entrezgene);Acc:404133]
91.1536	ENSBTAG00000015650	TNN	tenascin N [Source:VGNC Symbol;Acc:VGNC:36188]
91.0835	ENSBTAG00000039319	CYP4F2	cytochrome P450, family 4, subfamily F, polypeptide 2 [Source:NCBI gene (formerly Entrezgene);Acc:507615]
90.1907	ENSBTAG00000018137	A2M	alpha-2-macroglobulin [Source:VGNC Symbol;Acc:VGNC:55837]
89.5918	ENSBTAG00000053811	ENSBTAG00000053811
89.4466	ENSBTAG00000013578	CHI3L2	chitinase 3 like 2 [Source:VGNC Symbol;Acc:VGNC:27291]
88.9463	ENSBTAG00000006823	CMYA5	cardiomyopathy associated 5 [Source:VGNC Symbol;Acc:VGNC:27491]
88.9204	ENSBTAG00000003989	GSTO1	glutathione S-transferase omega 1 [Source:NCBI gene (formerly Entrezgene);Acc:505642]
88.4831	ENSBTAG00000004511	VAV2	vav guanine nucleotide exchange factor 2 [Source:VGNC Symbol;Acc:VGNC:36773]
88.4752	ENSBTAG00000021304	TP53BP1	tumor protein p53 binding protein 1 [Source:VGNC Symbol;Acc:VGNC:36232]
88.2976	ENSBTAG00000038258	ENSBTAG00000038258	tubulin alpha-3 chain [Source:NCBI gene (formerly Entrezgene);Acc:100295712]
87.4169	ENSBTAG00000005967	UBR2	ubiquitin protein ligase E3 component n-recognin 2 [Source:VGNC Symbol;Acc:VGNC:36617]
87.385	ENSBTAG00000003789	VIRMA	vir like m6A methyltransferase associated [Source:VGNC Symbol;Acc:VGNC:36801]
86.3311	ENSBTAG00000002292	SMARCA1	SWI/SNF related, matrix associated, actin dependent regulator of chromatin, subfamily a, member 1 [Source:VGNC Symbol;Acc:VGNC:34985]
85.9718	ENSBTAG00000031184	CDKN1C	cyclin dependent kinase inhibitor 1C [Source:VGNC Symbol;Acc:VGNC:27144]
85.9594	ENSBTAG00000030482	KLK6	kallikrein related peptidase 6 [Source:VGNC Symbol;Acc:VGNC:30680]
85.5948	ENSBTAG00000017877	NECTIN4	nectin cell adhesion molecule 4 [Source:VGNC Symbol;Acc:VGNC:55633]
85.5508	ENSBTAG00000010664	PRKCQ	protein kinase C theta [Source:VGNC Symbol;Acc:VGNC:33334]
84.6481	ENSBTAG00000004216	MAP3K2	mitogen-activated protein kinase kinase kinase 2 [Source:VGNC Symbol;Acc:VGNC:31195]
84.3978	ENSBTAG00000003051	FER	FER tyrosine kinase [Source:VGNC Symbol;Acc:VGNC:28948]
83.8781	ENSBTAG00000032289	ARHGAP15	Rho GTPase activating protein 15 [Source:VGNC Symbol;Acc:VGNC:26076]
83.4341	ENSBTAG00000040512	PCP4L1	Purkinje cell protein 4 like 1 [Source:VGNC Symbol;Acc:VGNC:32645]
83.34	ENSBTAG00000007111	STEAP3	STEAP3 metalloreductase [Source:VGNC Symbol;Acc:VGNC:35380]
83.0719	ENSBTAG00000012251	MTR	5-methyltetrahydrofolate-homocysteine methyltransferase [Source:VGNC Symbol;Acc:VGNC:31749]
82.817	ENSBTAG00000017095	DENND4A	DENN domain containing 4A [Source:VGNC Symbol;Acc:VGNC:27999]
82.5816	ENSBTAG00000019801	ENSBTAG00000019801	protein FAM151A [Source:NCBI gene (formerly Entrezgene);Acc:615989]
82.5694	ENSBTAG00000020004	ZNF800	zinc finger protein 800 [Source:VGNC Symbol;Acc:VGNC:54518]
82.138	ENSBTAG00000013078	DNAH11	dynein heavy chain 11, axonemal [Source:NCBI gene (formerly Entrezgene);Acc:104968411]
81.7627	ENSBTAG00000034185	ENSBTAG00000034185
81.3456	ENSBTAG00000010047	TIAM2	TIAM Rac1 associated GEF 2 [Source:VGNC Symbol;Acc:VGNC:96546]
80.932	ENSBTAG00000038795	STARD3NL	STARD3 N-terminal like [Source:VGNC Symbol;Acc:VGNC:35364]
80.5518	ENSBTAG00000020729	DHRS7	dehydrogenase/reductase 7 [Source:VGNC Symbol;Acc:VGNC:28043]
79.1024	ENSBTAG00000039662	ENSBTAG00000039662	protein DDI1 homolog 2 [Source:NCBI gene (formerly Entrezgene);Acc:515551]
78.8379	ENSBTAG00000019373	CAPRIN2	caprin family member 2 [Source:VGNC Symbol;Acc:VGNC:26752]
78.3635	ENSBTAG00000038384	KRT5	keratin 5 [Source:VGNC Symbol;Acc:VGNC:50405]
78.2188	ENSBTAG00000002069	BOLA	MHC class I heavy chain [Source:NCBI gene (formerly Entrezgene);Acc:515712]
78.0809	ENSBTAG00000015138	MGA	MAX dimerization protein MGA [Source:VGNC Symbol;Acc:VGNC:31445]
77.5689	ENSBTAG00000009715	PDCD11	programmed cell death 11 [Source:VGNC Symbol;Acc:VGNC:32659]
76.0778	ENSBTAG00000012712	AQR	aquarius intron-binding spliceosomal factor [Source:VGNC Symbol;Acc:VGNC:26052]
75.6184	ENSBTAG00000006855	TDRD1	tudor domain containing 1 [Source:VGNC Symbol;Acc:VGNC:35715]
75.13	ENSBTAG00000013802	DAB1	DAB adaptor protein 1 [Source:VGNC Symbol;Acc:VGNC:27864]
75.0822	ENSBTAG00000003855	FAM120C	family with sequence similarity 120C [Source:VGNC Symbol;Acc:VGNC:28721]
74.4146	ENSBTAG00000004100	TTI1	TELO2 interacting protein 1 [Source:VGNC Symbol;Acc:VGNC:36485]
74.3829	ENSBTAG00000024561	H3-3A	H3.3 histone A [Source:VGNC Symbol;Acc:VGNC:83611]
73.9697	ENSBTAG00000013545	MAVS	mitochondrial antiviral signaling protein [Source:VGNC Symbol;Acc:VGNC:31268]
73.1787	ENSBTAG00000000869	OBI1	ORC ubiquitin ligase 1 [Source:VGNC Symbol;Acc:VGNC:34054]
71.8111	ENSBTAG00000020116	JSP.1	Bos taurus uncharacterized protein 100125016 (LOC100125916), mRNA. [Source:RefSeq mRNA;Acc:NM_001105487]
