# Supplementary material for: PGE2 Supplementation of Oocyte Culture Media Improves the Developmental and Cryotolerance Performance of Bovine Blastocysts Derived From a Serum-Free in vitro Production System, Mirroring the Inner Cell Mass Transcriptome
Source: Front Cell Dev Biol. 2021 Jun 7;9:672948. doi: 10.3389/fcell.2021.672948 (PMC8215579; doi:10.3389/fcell.2021.672948)
Supplement: Supplementary file 6 [file Data_Sheet_2.xlsx]

## Sheet: sheet summary
		sheet title	description
		SC vs SF padj<0.05	list of differentially expressed genes between serum-containing IVP group and serum-free IVP group at padjusted<0.05
		SC vs SF+PGE2 padj<0.05	list of differentially expressed genes between serum-containing IVP group and serum-free+PGE2 IVP group at padjusted<0.05
		SF vs SF+PGE2 pval<0.05	list of differentially expressed genes between serum-free IVP group and serum-free+PGE2 IVP group at pvalue<0.05

## Sheet: SC vs SF padj<0.05
GenestableID	baseMean	log2FoldChange	lfcSE	stat	pvalue	padj	GeneName	GeneDescription
ENSBTAG00000007136	22.509	20.8122	2.8516	7.29841	2.91181e-13	4.24745e-09	ADAM22	ADAM metallopeptidase domain 22 [Source:VGNC Symbol;Acc:VGNC:54401]
ENSBTAG00000019340	26.0605	-21.6622	3.08032	-7.03245	2.0294e-12	1.03954e-08	ENSBTAG00000003014
ENSBTAG00000010373	573.282	-1.36854	0.194805	-7.02518	2.13795e-12	1.03954e-08	CACTIN	cactin, spliceosome C complex subunit [Source:VGNC Symbol;Acc:VGNC:58364]
ENSBTAG00000003232	268.314	2.57409	0.374026	6.8821	5.89758e-12	2.1507e-08	RAB29	RAB29, member RAS oncogene family [Source:VGNC Symbol;Acc:VGNC:33636]
ENSBTAG00000019901	5809.76	-1.19685	0.175603	-6.81567	9.38262e-12	2.73728e-08	RAD54L	RAD54 like [Source:VGNC Symbol;Acc:VGNC:49567]
ENSBTAG00000000146	3112.85	-1.11018	0.168271	-6.59757	4.17939e-11	1.01608e-07	FARP1	FERM, ARH/RhoGEF and pleckstrin domain protein 1 [Source:VGNC Symbol;Acc:VGNC:28865]
ENSBTAG00000010531	220.843	-6.51729	1.06346	-6.12839	8.87755e-10	1.84995e-06	CYP1B1	cytochrome P450, family 1, subfamily B, polypeptide 1 [Source:NCBI gene;Acc:511470]
ENSBTAG00000008611	1749.88	-1.82932	0.299618	-6.10552	1.02465e-09	1.86832e-06	IGFBP4	insulin like growth factor binding protein 4 [Source:VGNC Symbol;Acc:VGNC:30086]
ENSBTAG00000019530	126.112	-2.82875	0.465619	-6.07525	1.23793e-09	2.00642e-06	KDM8	lysine demethylase 8 [Source:VGNC Symbol;Acc:VGNC:30534]
ENSBTAG00000003684	16.9426	-21.4203	3.56189	-6.01373	1.81297e-09	2.5568e-06	LRFN5	leucine rich repeat and fibronectin type III domain containing 5 [Source:VGNC Symbol;Acc:VGNC:30979]
ENSBTAG00000002089	1477.81	-1.482	0.246846	-6.00375	1.92807e-09	2.5568e-06	FAM217A	family with sequence similarity 217 member A [Source:VGNC Symbol;Acc:VGNC:53967]
ENSBTAG00000016688	64.5358	-22.7604	3.8404	-5.92658	3.09311e-09	3.34926e-06	ENSBTAG00000016688
ENSBTAG00000003639	3604.79	-1.43498	0.242384	-5.92025	3.21448e-09	3.34926e-06	ELMO2	engulfment and cell motility 2 [Source:VGNC Symbol;Acc:VGNC:28439]
ENSBTAG00000023831	710.017	1.23696	0.208455	5.93392	2.9578e-09	3.34926e-06	ELP4	elongator acetyltransferase complex subunit 4 [Source:VGNC Symbol;Acc:VGNC:28457]
ENSBTAG00000014186	843.648	-1.0405	0.179141	-5.80825	6.31274e-09	6.13893e-06	NCOA5	nuclear receptor coactivator 5 [Source:VGNC Symbol;Acc:VGNC:31923]
ENSBTAG00000011083	2424.66	-1.45252	0.251036	-5.78611	7.20348e-09	6.39234e-06	POLD1	DNA polymerase delta 1, catalytic subunit [Source:VGNC Symbol;Acc:VGNC:33113]
ENSBTAG00000053935	41.3123	21.9386	3.7953	5.78046	7.44977e-09	6.39234e-06	ENSBTAG00000053935
ENSBTAG00000003014	30.0866	-21.9778	3.84083	-5.72216	1.05181e-08	8.52377e-06	TRPV2	transient receptor potential cation channel subfamily V member 2 [Source:VGNC Symbol;Acc:VGNC:36398]
ENSBTAG00000013664	416.776	1.61787	0.283354	5.70972	1.13162e-08	8.68783e-06	FILIP1L	filamin A interacting protein 1 like [Source:VGNC Symbol;Acc:VGNC:29013]
ENSBTAG00000017225	2064.08	-1.34829	0.240266	-5.61167	2.00387e-08	1.46153e-05	RNF135	ring finger protein 135 [Source:VGNC Symbol;Acc:VGNC:57150]
ENSBTAG00000014074	751.852	1.07754	0.193328	5.57361	2.49509e-08	1.73314e-05	SNX13	sorting nexin 13 [Source:NCBI gene;Acc:532001]
ENSBTAG00000044053	566.079	1.7318	0.31342	5.52548	3.28584e-08	2.17866e-05	SLC17A5	solute carrier family 17 member 5 [Source:VGNC Symbol;Acc:VGNC:34700]
ENSBTAG00000038981	27.4018	-21.1823	3.84218	-5.51309	3.52587e-08	2.23616e-05	ENSBTAG00000003684	adhesion G protein-coupled receptor E4 [Source:NCBI gene;Acc:518134]
ENSBTAG00000017801	8931	0.869636	0.158446	5.48854	4.05268e-08	2.46318e-05	ATP6AP2	ATPase H+ transporting accessory protein 2 [Source:NCBI gene;Acc:513520]
ENSBTAG00000004337	1275.92	-1.59231	0.291428	-5.46381	4.66029e-08	2.71918e-05	PDE1B	phosphodiesterase 1B [Source:VGNC Symbol;Acc:VGNC:32672]
ENSBTAG00000050061	773.324	-1.32617	0.244084	-5.43323	5.53416e-08	3.10487e-05	INCENP	inner centromere protein [Source:NCBI gene;Acc:507693]
ENSBTAG00000020829	1934.85	1.47983	0.273676	5.40722	6.40114e-08	3.45827e-05	PTPRK	protein tyrosine phosphatase receptor type K [Source:VGNC Symbol;Acc:VGNC:33552]
ENSBTAG00000003405	325.886	2.12856	0.395142	5.38683	7.17107e-08	3.73587e-05	TP53I3	tumor protein p53 inducible protein 3 [Source:VGNC Symbol;Acc:VGNC:36235]
ENSBTAG00000013338	872.21	-2.23655	0.41689	-5.36484	8.10208e-08	3.81242e-05	SLC7A9	solute carrier family 7 member 9 [Source:VGNC Symbol;Acc:VGNC:34934]
ENSBTAG00000019915	7571.9	-2.10015	0.391422	-5.36544	8.07538e-08	3.81242e-05	GSN	gelsolin [Source:VGNC Symbol;Acc:VGNC:29680]
ENSBTAG00000021587	2737.27	1.80556	0.336208	5.37037	7.85743e-08	3.81242e-05	SMPDL3A	sphingomyelin phosphodiesterase acid like 3A [Source:VGNC Symbol;Acc:VGNC:35033]
ENSBTAG00000006288	510.25	-1.97127	0.371241	-5.30996	1.0965e-07	4.84684e-05	VSTM4	V-set and transmembrane domain containing 4 [Source:VGNC Symbol;Acc:VGNC:54511]
ENSBTAG00000002813	826.549	1.48545	0.279684	5.31116	1.08929e-07	4.84684e-05	GAB1	GRB2 associated binding protein 1 [Source:VGNC Symbol;Acc:VGNC:29183]
ENSBTAG00000005884	50.894	-4.70931	0.889504	-5.29431	1.19467e-07	5.12548e-05	WDR31	WD repeat domain 31 [Source:VGNC Symbol;Acc:VGNC:36891]
ENSBTAG00000018530	2332.52	-1.62109	0.308567	-5.25362	1.49135e-07	6.21553e-05	TUBA8	tubulin alpha 8 [Source:VGNC Symbol;Acc:VGNC:36504]
ENSBTAG00000004024	1816.25	1.10017	0.210178	5.23445	1.65474e-07	6.70492e-05	UBE2Q2	ubiquitin conjugating enzyme E2 Q2 [Source:VGNC Symbol;Acc:VGNC:36593]
ENSBTAG00000001708	3392.25	-1.02323	0.196399	-5.20997	1.88872e-07	7.42369e-05	TTLL12	tubulin tyrosine ligase like 12 [Source:VGNC Symbol;Acc:VGNC:36491]
ENSBTAG00000039618	2504.58	-0.913153	0.175418	-5.20558	1.93392e-07	7.42369e-05	ARL14EPL	ADP ribosylation factor like GTPase 14 effector protein like [Source:NCBI gene;Acc:616348]
ENSBTAG00000013367	4804.01	0.766348	0.14892	5.14605	2.66033e-07	9.95033e-05	PPT1	palmitoyl-protein thioesterase 1 [Source:VGNC Symbol;Acc:VGNC:33277]
ENSBTAG00000019767	405.105	-2.22041	0.433362	-5.12369	2.99607e-07	0.000109259	MIER2	MIER family member 2 [Source:VGNC Symbol;Acc:VGNC:31470]
ENSBTAG00000002454	2242.91	0.875008	0.171321	5.10741	3.26602e-07	0.000110794	ALG2	ALG2 alpha-1,3/1,6-mannosyltransferase [Source:VGNC Symbol;Acc:VGNC:25827]
ENSBTAG00000016514	552.065	1.27469	0.249153	5.11609	3.1194e-07	0.000110794	CPE	carboxypeptidase E [Source:VGNC Symbol;Acc:VGNC:27648]
ENSBTAG00000005622	4335.48	1.47476	0.288559	5.11076	3.20873e-07	0.000110794	LITAF	lipopolysaccharide induced TNF factor [Source:VGNC Symbol;Acc:VGNC:30911]
ENSBTAG00000013929	4617.96	-1.12934	0.221496	-5.09869	3.42014e-07	0.000113386	RRAD	RRAD, Ras related glycolysis inhibitor and calcium channel regulator [Source:VGNC Symbol;Acc:VGNC:34158]
ENSBTAG00000026748	7483.51	-1.61747	0.318323	-5.08124	3.74985e-07	0.000121553	GULO	L-gulono-gamma-lactone oxidase [Source:NCBI gene;Acc:286812]
ENSBTAG00000010105	2017.6	2.07555	0.410548	5.05556	4.29121e-07	0.000136078	SLC35G1	solute carrier family 35 member G1 [Source:VGNC Symbol;Acc:VGNC:55969]
ENSBTAG00000055014	7320.43	1.09785	0.217423	5.04935	4.43306e-07	0.000137585	SH3BGRL2	SH3 domain binding glutamate rich protein like 2 [Source:NCBI gene;Acc:785404]
ENSBTAG00000011343	24.8146	-7.38581	1.46903	-5.02766	4.96489e-07	0.000147802	XAF1	XIAP associated factor 1 [Source:VGNC Symbol;Acc:VGNC:36982]
ENSBTAG00000003746	5645.86	0.89589	0.178165	5.02842	4.94547e-07	0.000147802	SCP2	sterol carrier protein 2 [Source:VGNC Symbol;Acc:VGNC:34361]
ENSBTAG00000003212	281.172	-2.80332	0.562097	-4.98725	6.12436e-07	0.0001718	NNAT	neuronatin [Source:VGNC Symbol;Acc:VGNC:32142]
ENSBTAG00000010389	1317.53	-1.6054	0.321767	-4.98932	6.05908e-07	0.0001718	STBD1	starch binding domain 1 [Source:VGNC Symbol;Acc:VGNC:35376]
ENSBTAG00000012820	4320.39	-1.14342	0.229064	-4.99173	5.98396e-07	0.0001718	STX3	syntaxin 3 [Source:VGNC Symbol;Acc:VGNC:35439]
ENSBTAG00000030434	5881.61	0.854342	0.172063	4.96527	6.86051e-07	0.000188819	FUCA1	alpha-L-fucosidase 1 [Source:VGNC Symbol;Acc:VGNC:29140]
ENSBTAG00000000720	18071.3	1.24212	0.251108	4.94656	7.55364e-07	0.000204046	CTSL	cathepsin L [Source:NCBI gene;Acc:515200]
ENSBTAG00000020528	932.468	-1.03111	0.209533	-4.92098	8.61118e-07	0.000228384	PCOLCE	procollagen C-endopeptidase enhancer [Source:VGNC Symbol;Acc:VGNC:32642]
ENSBTAG00000012109	759.249	-1.38595	0.282265	-4.9101	9.10302e-07	0.000232957	EDN3	endothelin 3 [Source:VGNC Symbol;Acc:VGNC:56185]
ENSBTAG00000007807	4464.41	-1.06657	0.217205	-4.91044	9.08741e-07	0.000232957	HSPA2	heat shock protein family A (Hsp70) member 2 [Source:NCBI gene;Acc:281827]
ENSBTAG00000040076	4409.49	-0.669772	0.13659	-4.90354	9.41242e-07	0.000236722	ILF3	interleukin enhancer binding factor 3 [Source:VGNC Symbol;Acc:VGNC:30176]
ENSBTAG00000012024	808.531	-0.980293	0.200483	-4.88966	1.01013e-06	0.000249741	SLC29A2	solute carrier family 29 member 2 [Source:VGNC Symbol;Acc:VGNC:34794]
ENSBTAG00000054188	2145.29	-0.884492	0.181297	-4.8787	1.06786e-06	0.000259616	CMTM3	CKLF like MARVEL transmembrane domain containing 3 [Source:NCBI gene;Acc:787512]
ENSBTAG00000008835	2399.19	-0.78872	0.16194	-4.87046	1.1134e-06	0.000266249	GPANK1	G-patch domain and ankyrin repeats 1 [Source:VGNC Symbol;Acc:VGNC:29511]
ENSBTAG00000010871	819.527	1.4137	0.29083	4.86092	1.16839e-06	0.000274893	ENSBTAG00000010871
ENSBTAG00000004392	414.32	-1.27415	0.26234	-4.85686	1.1926e-06	0.000276134	C29H11orf24	chromosome 29 C11orf24 homolog [Source:VGNC Symbol;Acc:VGNC:52698]
ENSBTAG00000005710	218.962	-1.90971	0.394234	-4.8441	1.27187e-06	0.000289886	NCAM1	neural cell adhesion molecule 1 [Source:VGNC Symbol;Acc:VGNC:31898]
ENSBTAG00000010694	120.878	-2.81404	0.582623	-4.82994	1.36575e-06	0.000306495	BICC1	BicC family RNA binding protein 1 [Source:VGNC Symbol;Acc:VGNC:26490]
ENSBTAG00000021373	1040.91	-1.04025	0.216088	-4.814	1.47939e-06	0.000326967	GTF3C5	general transcription factor IIIC subunit 5 [Source:VGNC Symbol;Acc:VGNC:29706]
ENSBTAG00000004499	26.5287	-8.5919	1.78891	-4.80288	1.56401e-06	0.000339049	RGS3	regulator of G protein signaling 3 [Source:VGNC Symbol;Acc:VGNC:33922]
ENSBTAG00000009051	61.4135	-8.54362	1.77963	-4.80077	1.58054e-06	0.000339049	MMP19	matrix metallopeptidase 19 [Source:VGNC Symbol;Acc:VGNC:31523]
ENSBTAG00000030222	2933.29	-1.34373	0.280771	-4.78584	1.70275e-06	0.000359971	L3MBTL2	L3MBTL histone methyl-lysine binding protein 2 [Source:VGNC Symbol;Acc:VGNC:30763]
ENSBTAG00000050965	1357	1.34034	0.280717	4.7747	1.79975e-06	0.000375043	ENSBTAG00000050965
ENSBTAG00000013287	151.176	-1.92978	0.405164	-4.76295	1.90781e-06	0.000391961	SMO	smoothened, frizzled class receptor [Source:VGNC Symbol;Acc:VGNC:35025]
ENSBTAG00000013860	1126.92	1.29452	0.272256	4.75479	1.98658e-06	0.000402475	GADD45A	growth arrest and DNA damage inducible alpha [Source:VGNC Symbol;Acc:VGNC:29206]
ENSBTAG00000013631	13985.8	-1.13924	0.239964	-4.74752	2.05928e-06	0.00041149	GLUL	glutamate-ammonia ligase [Source:VGNC Symbol;Acc:VGNC:29426]
ENSBTAG00000007931	740.97	2.09896	0.442491	4.7435	2.10058e-06	0.00041407	SLC38A6	solute carrier family 38 member 6 [Source:VGNC Symbol;Acc:VGNC:34853]
ENSBTAG00000005989	6850.15	1.10841	0.233959	4.73761	2.16254e-06	0.0004206	LAP3	leucine aminopeptidase 3 [Source:VGNC Symbol;Acc:VGNC:30786]
ENSBTAG00000053485	39.7685	-4.67255	0.990036	-4.71958	2.36336e-06	0.00045361	ZNF619	zinc finger protein 619 [Source:HGNC Symbol;Acc:HGNC:26910]
ENSBTAG00000007102	811.416	-1.02523	0.21776	-4.70809	2.50051e-06	0.000473701	GTSE1	G2 and S-phase expressed 1 [Source:VGNC Symbol;Acc:VGNC:29711]
ENSBTAG00000015183	780.929	-1.18589	0.253553	-4.67708	2.90988e-06	0.000537297	TPCN2	two pore segment channel 2 [Source:VGNC Symbol;Acc:VGNC:36244]
ENSBTAG00000031134	7721.78	-0.786944	0.168227	-4.67787	2.89876e-06	0.000537297	YWHAH	tyrosine 3-monooxygenase/tryptophan 5-monooxygenase activation protein eta [Source:NCBI gene;Acc:282126]
ENSBTAG00000009586	2873.24	-1.13425	0.243134	-4.6651	3.08468e-06	0.000562453	CDC25A	cell division cycle 25A [Source:VGNC Symbol;Acc:VGNC:27062]
ENSBTAG00000027409	656.887	-1.62009	0.347557	-4.66136	3.14129e-06	0.000565704	SLC4A11	solute carrier family 4 member 11 [Source:VGNC Symbol;Acc:VGNC:34891]
ENSBTAG00000012938	3106.72	-0.848897	0.182514	-4.65113	3.30118e-06	0.000581802	JARID2	jumonji and AT-rich interaction domain containing 2 [Source:VGNC Symbol;Acc:VGNC:30371]
ENSBTAG00000018381	3031.75	1.04881	0.225524	4.65055	3.31045e-06	0.000581802	CRLF3	cytokine receptor like factor 3 [Source:VGNC Symbol;Acc:VGNC:27718]
ENSBTAG00000001537	1148.78	-1.61487	0.350433	-4.6082	4.06162e-06	0.000705319	TSKU	tsukushi, small leucine rich proteoglycan [Source:VGNC Symbol;Acc:VGNC:54896]
ENSBTAG00000000532	1730.58	0.9095	0.197513	4.60476	4.1294e-06	0.000708654	EXO5	exonuclease 5 [Source:VGNC Symbol;Acc:VGNC:59180]
ENSBTAG00000010236	1435.69	-1.41477	0.308324	-4.58857	4.46298e-06	0.000756993	CIDEB	cell death inducing DFFA like effector b [Source:VGNC Symbol;Acc:VGNC:27364]
ENSBTAG00000019581	550.081	1.06763	0.233915	4.56416	5.01508e-06	0.000840862	PLEKHF2	pleckstrin homology and FYVE domain containing 2 [Source:VGNC Symbol;Acc:VGNC:33013]
ENSBTAG00000007638	88.9914	-1.95419	0.429933	-4.54534	5.48475e-06	0.00090916	PIF1	PIF1 5'-to-3' DNA helicase [Source:VGNC Symbol;Acc:VGNC:32866]
ENSBTAG00000007728	5792.29	-1.09807	0.241988	-4.53771	5.68686e-06	0.000921714	PES1	pescadillo ribosomal biogenesis factor 1 [Source:VGNC Symbol;Acc:VGNC:32750]
ENSBTAG00000055111	3415.52	1.37431	0.302777	4.53901	5.65193e-06	0.000921714	ENSBTAG00000055111
ENSBTAG00000013530	763.713	-1.18672	0.261686	-4.5349	5.76316e-06	0.000923816	DDAH2	dimethylarginine dimethylaminohydrolase 2 [Source:VGNC Symbol;Acc:VGNC:27940]
ENSBTAG00000053316	6946.74	0.865077	0.191014	4.52887	5.92993e-06	0.000940216	ENSBTAG00000053316
ENSBTAG00000047225	912.828	-1.95293	0.432023	-4.52043	6.17142e-06	0.000961484	BCL2L14	BCL2 like 14 [Source:VGNC Symbol;Acc:VGNC:26448]
ENSBTAG00000001788	15070.7	2.13747	0.472934	4.51959	6.19589e-06	0.000961484	PDPN	podoplanin [Source:VGNC Symbol;Acc:VGNC:50142]
ENSBTAG00000017666	3115.56	0.999093	0.221203	4.51664	6.28278e-06	0.000964705	ABCC5	ATP binding cassette subfamily C member 5 [Source:VGNC Symbol;Acc:VGNC:25474]
ENSBTAG00000037651	594.6	1.9237	0.426386	4.51164	6.43277e-06	0.000977446	S100A2	S100 calcium binding protein A2 [Source:VGNC Symbol;Acc:VGNC:34242]
ENSBTAG00000012074	32.4643	-6.78395	1.50995	-4.49283	7.02843e-06	0.00105397	MYB	MYB proto-oncogene, transcription factor [Source:VGNC Symbol;Acc:VGNC:31776]
ENSBTAG00000018978	875.526	-0.991824	0.220835	-4.49124	7.08089e-06	0.00105397	KAT14	lysine acetyltransferase 14 [Source:VGNC Symbol;Acc:VGNC:30397]
ENSBTAG00000049108	28.1686	-8.09871	1.80579	-4.48487	7.29585e-06	0.00106939	TRAT1	T cell receptor associated transmembrane adaptor 1 [Source:NCBI gene;Acc:614942]
ENSBTAG00000009097	1706.87	-0.933105	0.208104	-4.48384	7.33108e-06	0.00106939	FANCI	FA complementation group I [Source:VGNC Symbol;Acc:VGNC:28859]
ENSBTAG00000054085	1797.19	2.13668	0.477028	4.47915	7.49418e-06	0.00108235	SELENOP	selenoprotein P [Source:NCBI gene;Acc:282066]
ENSBTAG00000055052	607.403	1.2381	0.277388	4.46343	8.06588e-06	0.0011535	ENSBTAG00000055052
ENSBTAG00000017465	2912.3	1.01082	0.227078	4.4514	8.53105e-06	0.00120818	GNS	glucosamine (N-acetyl)-6-sulfatase [Source:VGNC Symbol;Acc:VGNC:56204]
ENSBTAG00000021830	1452.41	1.91919	0.432232	4.44019	8.98778e-06	0.00126062	ENPP1	ectonucleotide pyrophosphatase/phosphodiesterase 1 [Source:VGNC Symbol;Acc:VGNC:28504]
ENSBTAG00000030629	2091.28	-1.2492	0.28241	-4.42337	9.71719e-06	0.00134995	MGC127133	20-beta-hydroxysteroid dehydrogenase-like [Source:NCBI gene;Acc:510180]
ENSBTAG00000013568	527.522	0.895713	0.202669	4.41958	9.88943e-06	0.00136092	UEVLD	UEV and lactate/malate dehyrogenase domains [Source:VGNC Symbol;Acc:VGNC:36643]
ENSBTAG00000020043	1347.5	-0.862424	0.195662	-4.40772	1.04462e-05	0.00139524	ARHGAP17	Rho GTPase activating protein 17 [Source:VGNC Symbol;Acc:VGNC:26077]
ENSBTAG00000014318	1055.36	0.800371	0.181678	4.40543	1.05572e-05	0.00139524	SLC33A1	solute carrier family 33 member 1 [Source:VGNC Symbol;Acc:VGNC:34816]
ENSBTAG00000012902	4412.66	0.869792	0.197414	4.40592	1.05337e-05	0.00139524	ARL8B	ADP ribosylation factor like GTPase 8B [Source:VGNC Symbol;Acc:VGNC:26154]
ENSBTAG00000050847	4675.5	1.13941	0.258386	4.4097	1.03512e-05	0.00139524	ENSBTAG00000050847
ENSBTAG00000017077	41371.1	1.17375	0.266508	4.40421	1.06171e-05	0.00139524	CTSV	cathepsin V [Source:NCBI gene;Acc:281108]
ENSBTAG00000022000	26.3537	-3.92472	0.892805	-4.39594	1.10292e-05	0.00143646	CACNB2	calcium voltage-gated channel auxiliary subunit beta 2 [Source:VGNC Symbol;Acc:VGNC:26684]
ENSBTAG00000001182	10950.1	0.590447	0.134382	4.39378	1.11397e-05	0.001438	SEPTIN7	septin 7 [Source:VGNC Symbol;Acc:VGNC:53670]
ENSBTAG00000025263	616.012	-1.49169	0.340582	-4.37983	1.18771e-05	0.00150304	FAM160A1	family with sequence similarity 160 member A1 [Source:VGNC Symbol;Acc:VGNC:28739]
ENSBTAG00000008755	3177.54	0.66838	0.152652	4.37845	1.19526e-05	0.00150304	MARCHF7	membrane associated ring-CH-type finger 7 [Source:VGNC Symbol;Acc:VGNC:31242]
ENSBTAG00000019794	1646.29	0.7805	0.178255	4.37856	1.19469e-05	0.00150304	SYPL1	synaptophysin like 1 [Source:VGNC Symbol;Acc:VGNC:53679]
ENSBTAG00000052397	9065.45	-1.54519	0.35331	-4.37348	1.22283e-05	0.00152457	ENSBTAG00000052397	interleukin 32-like [Source:NCBI gene;Acc:100139916]
ENSBTAG00000009372	1560.9	-0.707564	0.162371	-4.3577	1.31434e-05	0.00162477	TTC5	tetratricopeptide repeat domain 5 [Source:VGNC Symbol;Acc:VGNC:36479]
ENSBTAG00000005694	9767.01	0.561046	0.129025	4.34834	1.37172e-05	0.00168145	TMED10	transmembrane p24 trafficking protein 10 [Source:VGNC Symbol;Acc:VGNC:35935]
ENSBTAG00000011554	1808.59	-1.41773	0.326941	-4.33634	1.44878e-05	0.00173224	SURF6	surfeit 6 [Source:VGNC Symbol;Acc:VGNC:35485]
ENSBTAG00000003017	756.137	-1.25852	0.29002	-4.33944	1.42846e-05	0.00173224	TTC38	tetratricopeptide repeat domain 38 [Source:VGNC Symbol;Acc:VGNC:36474]
ENSBTAG00000002078	2498.19	-1.07722	0.248355	-4.33744	1.44152e-05	0.00173224	KDM4A	lysine demethylase 4A [Source:VGNC Symbol;Acc:VGNC:30527]
ENSBTAG00000007093	256.409	-1.35132	0.31201	-4.33102	1.48417e-05	0.00174593	ENSBTAG00000007093
ENSBTAG00000035710	16.4952	7.89029	1.82116	4.33257	1.47379e-05	0.00174593	ZBBX	zinc finger B-box domain containing [Source:VGNC Symbol;Acc:VGNC:53614]
ENSBTAG00000044099	441.053	-1.1602	0.268029	-4.32862	1.50046e-05	0.00175098	ZSWIM7	zinc finger SWIM-type containing 7 [Source:VGNC Symbol;Acc:VGNC:37387]
ENSBTAG00000008726	214.361	-1.8679	0.432295	-4.32089	1.554e-05	0.00179906	NCS1	neuronal calcium sensor 1 [Source:VGNC Symbol;Acc:VGNC:31928]
ENSBTAG00000033345	1285.34	2.91914	0.678455	4.30263	1.68786e-05	0.00193865	STAR	steroidogenic acute regulatory protein [Source:VGNC Symbol;Acc:VGNC:35360]
ENSBTAG00000016588	2371.64	-1.18985	0.276658	-4.3008	1.70181e-05	0.0019394	TMEM8A	transmembrane protein 8A [Source:VGNC Symbol;Acc:VGNC:36123]
ENSBTAG00000049369	53.9036	-1.91297	0.445385	-4.29509	1.74625e-05	0.00197462	MYMX	myomixer, myoblast fusion factor [Source:HGNC Symbol;Acc:HGNC:52391]
ENSBTAG00000034373	59.3309	-7.86381	1.84434	-4.26375	2.01021e-05	0.00222678	CDH13	cadherin 13 [Source:VGNC Symbol;Acc:VGNC:27093]
ENSBTAG00000016591	358.485	-1.3866	0.325117	-4.26491	1.99982e-05	0.00222678	RAB11FIP3	RAB11 family interacting protein 3 [Source:VGNC Symbol;Acc:VGNC:33618]
ENSBTAG00000003788	1773.82	-1.03843	0.243579	-4.26322	2.01505e-05	0.00222678	RCC1	regulator of chromosome condensation 1 [Source:VGNC Symbol;Acc:VGNC:33825]
ENSBTAG00000014380	14833.5	-1.10262	0.25925	-4.25311	2.10819e-05	0.0023122	MCM2	minichromosome maintenance complex component 2 [Source:VGNC Symbol;Acc:VGNC:31308]
ENSBTAG00000022635	551.428	-1.5346	0.361617	-4.24371	2.1985e-05	0.00239199	LAMB2	laminin, beta 2 (laminin S) [Source:NCBI gene;Acc:520167]
ENSBTAG00000019013	2247.45	-0.678356	0.159934	-4.24147	2.22059e-05	0.00239199	HECTD3	HECT domain E3 ubiquitin protein ligase 3 [Source:VGNC Symbol;Acc:VGNC:29802]
ENSBTAG00000001269	2226.67	0.775825	0.183027	4.23886	2.24654e-05	0.00239199	TMEM165	transmembrane protein 165 [Source:VGNC Symbol;Acc:VGNC:35990]
ENSBTAG00000038107	758.378	1.30505	0.307772	4.24033	2.23189e-05	0.00239199	MAPKAPK2	MAPK activated protein kinase 2 [Source:VGNC Symbol;Acc:VGNC:54449]
ENSBTAG00000006395	6103.89	-0.70137	0.165542	-4.2368	2.26732e-05	0.00239662	TUBGCP2	tubulin gamma complex associated protein 2 [Source:VGNC Symbol;Acc:VGNC:36512]
ENSBTAG00000003109	31759.8	0.956655	0.226268	4.22798	2.35803e-05	0.00247458	ITM2B	integral membrane protein 2B [Source:VGNC Symbol;Acc:VGNC:30340]
ENSBTAG00000000854	48.4881	-2.42358	0.574061	-4.22183	2.42332e-05	0.0025164	SEC16B	SEC16 homolog B, endoplasmic reticulum export factor [Source:VGNC Symbol;Acc:VGNC:34407]
ENSBTAG00000020484	1711.11	-0.858285	0.203338	-4.22098	2.43239e-05	0.0025164	ADCK2	aarF domain containing kinase 2 [Source:VGNC Symbol;Acc:VGNC:25640]
ENSBTAG00000030259	46.4645	4.66176	1.10533	4.21755	2.46973e-05	0.00253704	RASGRF2	Ras protein specific guanine nucleotide releasing factor 2 [Source:VGNC Symbol;Acc:VGNC:33746]
ENSBTAG00000000105	1521.72	1.65922	0.393595	4.21554	2.49186e-05	0.00254188	RIT1	Ras like without CAAX 1 [Source:VGNC Symbol;Acc:VGNC:33987]
ENSBTAG00000003372	337.62	1.38353	0.32876	4.20833	2.57267e-05	0.00260608	SLC35B4	solute carrier family 35 member B4 [Source:VGNC Symbol;Acc:VGNC:34826]
ENSBTAG00000004200	1151.98	-1.22406	0.290977	-4.20672	2.59102e-05	0.00260656	GTPBP3	GTP binding protein 3, mitochondrial [Source:VGNC Symbol;Acc:VGNC:49552]
ENSBTAG00000010689	265.467	-2.76145	0.658573	-4.19309	2.75185e-05	0.00273093	NRG2	neuregulin 2 [Source:VGNC Symbol;Acc:VGNC:55226]
ENSBTAG00000009743	3836.67	-0.715466	0.170631	-4.19307	2.75208e-05	0.00273093	PDRG1	p53 and DNA damage regulated 1 [Source:VGNC Symbol;Acc:VGNC:32716]
ENSBTAG00000011044	2548.2	-0.841713	0.200917	-4.18936	2.79748e-05	0.00275722	TACC3	transforming acidic coiled-coil containing protein 3 [Source:VGNC Symbol;Acc:VGNC:53778]
ENSBTAG00000038051	1733.92	-0.957631	0.229245	-4.17732	2.9497e-05	0.00288773	ENSBTAG00000038051	AFG3-like protein 1 [Source:NCBI gene;Acc:532875]
ENSBTAG00000011865	7728.49	-0.814816	0.195149	-4.17536	2.97518e-05	0.00289326	MTA2	metastasis associated 1 family member 2 [Source:VGNC Symbol;Acc:VGNC:31714]
ENSBTAG00000015343	2204.33	-0.93828	0.22509	-4.16847	3.06652e-05	0.00296234	WDR34	WD repeat domain 34 [Source:VGNC Symbol;Acc:VGNC:36893]
ENSBTAG00000001406	873.53	-0.944952	0.227319	-4.15694	3.22545e-05	0.00308247	MAB21L3	mab-21 like 3 [Source:VGNC Symbol;Acc:VGNC:31129]
ENSBTAG00000001657	2696.58	0.953043	0.229296	4.15639	3.23314e-05	0.00308247	PICALM	phosphatidylinositol binding clathrin assembly protein [Source:VGNC Symbol;Acc:VGNC:32860]
ENSBTAG00000015533	558.05	-1.35406	0.326485	-4.14738	3.36303e-05	0.00318532	DISP3	dispatched RND transporter family member 3 [Source:VGNC Symbol;Acc:VGNC:28076]
ENSBTAG00000045901	73051.8	0.736489	0.177684	4.14494	3.3991e-05	0.00318532	CLDN6	claudin 6 [Source:VGNC Symbol;Acc:VGNC:27418]
ENSBTAG00000011986	378.13	1.4417	0.347863	4.14444	3.40653e-05	0.00318532	PLSCR4	phospholipid scramblase 4 [Source:VGNC Symbol;Acc:VGNC:33053]
ENSBTAG00000021377	7775.87	1.62971	0.393373	4.14291	3.42926e-05	0.00318615	S100A14	S100 calcium binding protein A14 [Source:VGNC Symbol;Acc:VGNC:34240]
ENSBTAG00000002902	3546.06	1.40902	0.340351	4.13991	3.47448e-05	0.00320773	ANO6	anoctamin 6 [Source:VGNC Symbol;Acc:VGNC:25955]
ENSBTAG00000009376	1477.03	-1.00767	0.243805	-4.13311	3.57887e-05	0.00328333	DPH1	diphthamide biosynthesis 1 [Source:VGNC Symbol;Acc:VGNC:28178]
ENSBTAG00000010422	2401.85	1.4119	0.342255	4.12529	3.70264e-05	0.00337565	MDM2	MDM2 proto-oncogene [Source:VGNC Symbol;Acc:VGNC:31336]
ENSBTAG00000054662	216.744	1.23219	0.299	4.12105	3.77147e-05	0.00341705	FBXL17	F-box and leucine rich repeat protein 17 [Source:NCBI gene;Acc:523504]
ENSBTAG00000011549	384.055	-1.50843	0.36695	-4.11072	3.94431e-05	0.00355158	TRPC2	transient receptor potential channel 2 [Source:NCBI gene;Acc:282101]
ENSBTAG00000003323	735.23	-1.5559	0.378697	-4.10856	3.98133e-05	0.00356293	NOL6	nucleolar protein 6 [Source:VGNC Symbol;Acc:VGNC:32158]
ENSBTAG00000009765	6630.78	-0.561025	0.136705	-4.10391	4.06225e-05	0.00359127	MTMR14	myotubularin related protein 14 [Source:VGNC Symbol;Acc:VGNC:31740]
ENSBTAG00000046588	2072.84	1.22459	0.298305	4.10515	4.04049e-05	0.00359127	DNAJB9	DnaJ heat shock protein family (Hsp40) member B9 [Source:NCBI gene;Acc:614588]
ENSBTAG00000011779	435.446	1.68138	0.409935	4.10157	4.1035e-05	0.00360589	MAL2	mal, T cell differentiation protein 2 [Source:VGNC Symbol;Acc:VGNC:54901]
ENSBTAG00000017584	772.732	-1.33145	0.324936	-4.09758	4.17493e-05	0.00364669	PLCG1	phospholipase C gamma 1 [Source:VGNC Symbol;Acc:VGNC:32988]
ENSBTAG00000011121	84.8606	4.48965	1.09663	4.09403	4.23942e-05	0.00368098	CLCN4	chloride voltage-gated channel 4 [Source:VGNC Symbol;Acc:VGNC:27398]
ENSBTAG00000004695	8840.39	-0.386886	0.0946096	-4.08929	4.32695e-05	0.00368637	CDK9	cyclin dependent kinase 9 [Source:VGNC Symbol;Acc:VGNC:27136]
ENSBTAG00000005524	4026.77	0.782237	0.191339	4.08823	4.34672e-05	0.00368637	HBP1	HMG-box transcription factor 1 [Source:VGNC Symbol;Acc:VGNC:29767]
ENSBTAG00000025443	524.308	1.01424	0.248037	4.08908	4.33083e-05	0.00368637	FNIP1	folliculin interacting protein 1 [Source:VGNC Symbol;Acc:VGNC:29068]
ENSBTAG00000046773	2242.53	2.02921	0.496047	4.09077	4.29935e-05	0.00368637	MCOLN2	mucolipin 2 [Source:VGNC Symbol;Acc:VGNC:31319]
ENSBTAG00000013298	524.684	1.78422	0.436693	4.08575	4.39339e-05	0.00370442	PLA2G4A	phospholipase A2 group IVA [Source:VGNC Symbol;Acc:VGNC:32960]
ENSBTAG00000011608	4364.98	-0.769392	0.188405	-4.08371	4.43231e-05	0.00371575	KIAA1191	KIAA1191 [Source:VGNC Symbol;Acc:VGNC:30565]
ENSBTAG00000019722	36.8154	8.25185	2.02134	4.08237	4.45789e-05	0.00371584	GUCY2C	guanylate cyclase 2C [Source:VGNC Symbol;Acc:VGNC:29722]
ENSBTAG00000010742	27.2175	-7.66398	1.88062	-4.07524	4.59669e-05	0.00378824	PKD2L1	polycystin 2 like 1, transient receptor potential cation channel [Source:VGNC Symbol;Acc:VGNC:32936]
ENSBTAG00000015172	21524.6	-0.65868	0.161593	-4.07617	4.57842e-05	0.00378824	MCM6	minichromosome maintenance complex component 6 [Source:VGNC Symbol;Acc:VGNC:31312]
ENSBTAG00000018260	1256.12	1.31861	0.323778	4.07257	4.6498e-05	0.0037892	MFSD11	major facilitator superfamily domain containing 11 [Source:VGNC Symbol;Acc:VGNC:31433]
ENSBTAG00000004863	34.25	4.64721	1.14106	4.07272	4.64682e-05	0.0037892	RIC3	RIC3 acetylcholine receptor chaperone [Source:VGNC Symbol;Acc:VGNC:33960]
ENSBTAG00000039719	1152.92	-1.72353	0.423749	-4.06734	4.7553e-05	0.00385364	PHGDH	phosphoglycerate dehydrogenase [Source:VGNC Symbol;Acc:VGNC:55654]
ENSBTAG00000045909	100.409	1.36009	0.334921	4.06091	4.88813e-05	0.00392179	FAM174A	family with sequence similarity 174 member A [Source:VGNC Symbol;Acc:VGNC:28761]
ENSBTAG00000011798	186.896	2.44816	0.602896	4.06067	4.89317e-05	0.00392179	STK38L	serine/threonine kinase 38 like [Source:VGNC Symbol;Acc:VGNC:35400]
ENSBTAG00000015040	21.6617	-3.41997	0.843204	-4.05593	4.99358e-05	0.0039804	ENSBTAG00000015040	sphingomyelin phosphodiesterase 5, pseudogene [Source:NCBI gene;Acc:100141215]
ENSBTAG00000020446	868.73	-1.27756	0.315493	-4.04942	5.1345e-05	0.00407049	THOP1	thimet oligopeptidase 1 [Source:VGNC Symbol;Acc:VGNC:35843]
ENSBTAG00000032637	2190.05	-0.852745	0.210818	-4.04494	5.23366e-05	0.00412667	EXOC1	exocyst complex component 1 [Source:VGNC Symbol;Acc:VGNC:28643]
ENSBTAG00000000843	2394.58	-1.29522	0.320772	-4.03782	5.39503e-05	0.00420882	NDRG2	NDRG family member 2 [Source:VGNC Symbol;Acc:VGNC:50007]
ENSBTAG00000004440	689.674	1.67043	0.413698	4.0378	5.39556e-05	0.00420882	SLC15A1	solute carrier family 15 member 1 [Source:VGNC Symbol;Acc:VGNC:34679]
ENSBTAG00000020169	3628.14	0.772629	0.191707	4.03026	5.57144e-05	0.0043229	CEPT1	choline/ethanolamine phosphotransferase 1 [Source:VGNC Symbol;Acc:VGNC:27220]
ENSBTAG00000015016	1268.72	-0.966477	0.240048	-4.02619	5.66878e-05	0.00437516	CALCOCO1	calcium binding and coiled-coil domain 1 [Source:VGNC Symbol;Acc:VGNC:26702]
ENSBTAG00000015037	30.0876	-4.14377	1.0303	-4.02191	5.77277e-05	0.00443197	GAREM2	GRB2 associated regulator of MAPK1 subtype 2 [Source:VGNC Symbol;Acc:VGNC:58378]
ENSBTAG00000031012	2508.54	0.593995	0.148167	4.00896	6.09864e-05	0.00465764	PIGK	phosphatidylinositol glycan anchor biosynthesis class K [Source:VGNC Symbol;Acc:VGNC:32870]
ENSBTAG00000000411	1085.8	-1.15646	0.289449	-3.99539	6.45873e-05	0.0048826	HGS	hepatocyte growth factor-regulated tyrosine kinase substrate [Source:VGNC Symbol;Acc:VGNC:29836]
ENSBTAG00000055296	176.425	1.46801	0.367431	3.99534	6.46015e-05	0.0048826	LGALSL	galectin like [Source:NCBI gene;Acc:516629]
ENSBTAG00000013721	1944.79	0.924259	0.231829	3.98682	6.69648e-05	0.00503513	PSMD10	proteasome 26S subunit, non-ATPase 10 [Source:NCBI gene;Acc:535414]
ENSBTAG00000018431	557.737	-0.982328	0.246494	-3.9852	6.74244e-05	0.00504369	NAV2	neuron navigator 2 [Source:VGNC Symbol;Acc:VGNC:31891]
ENSBTAG00000048549	1020.42	2.62204	0.658977	3.97895	6.92197e-05	0.00515157	IFNT	Bos taurus interferon-tau 3g (IFNT), mRNA. [Source:RefSeq mRNA;Acc:NM_001168279]
ENSBTAG00000016563	16384	0.959473	0.24129	3.97642	6.99592e-05	0.00518018	GOLGA4	golgin A4 [Source:VGNC Symbol;Acc:VGNC:29485]
ENSBTAG00000002143	210.203	1.35161	0.34049	3.96962	7.19883e-05	0.0053035	DTWD2	DTW domain containing 2 [Source:VGNC Symbol;Acc:VGNC:28235]
ENSBTAG00000002081	12.3569	7.86692	1.98241	3.96836	7.23693e-05	0.00530478	BMPR1B	bone morphogenetic protein receptor type 1B [Source:VGNC Symbol;Acc:VGNC:26525]
ENSBTAG00000010126	417.384	-1.23802	0.312633	-3.95997	7.49606e-05	0.00544005	PCIF1	PDX1 C-terminal inhibiting factor 1 [Source:VGNC Symbol;Acc:VGNC:32630]
ENSBTAG00000017278	754.57	-1.23153	0.310906	-3.96111	7.46015e-05	0.00544005	ACBD5	acyl-CoA binding domain containing 5 [Source:VGNC Symbol;Acc:VGNC:25532]
ENSBTAG00000053930	469.682	0.689139	0.174279	3.95422	7.67841e-05	0.0055448	ENSBTAG00000053930
ENSBTAG00000015368	1636.64	-1.46858	0.371608	-3.95196	7.75143e-05	0.00556996	SEPTIN4	septin 4 [Source:VGNC Symbol;Acc:VGNC:34456]
ENSBTAG00000007659	8680.11	-0.809187	0.204822	-3.95069	7.79258e-05	0.00557208	CORO2A	coronin 2A [Source:VGNC Symbol;Acc:VGNC:27623]
ENSBTAG00000002703	8035.22	0.742527	0.188085	3.94783	7.88625e-05	0.00561155	ATP6V1A	ATPase H+ transporting V1 subunit A [Source:VGNC Symbol;Acc:VGNC:26316]
ENSBTAG00000006343	20.0627	-7.74647	1.96428	-3.94366	8.02471e-05	0.00564398	IL1R2	interleukin 1 receptor type 2 [Source:VGNC Symbol;Acc:VGNC:30132]
ENSBTAG00000020607	12682.9	-0.695554	0.176364	-3.94386	8.0179e-05	0.00564398	ABCB6	ATP binding cassette subfamily B member 6 [Source:VGNC Symbol;Acc:VGNC:49049]
ENSBTAG00000008134	1041.59	1.17338	0.297587	3.94297	8.0479e-05	0.00564398	BDNF	brain derived neurotrophic factor [Source:VGNC Symbol;Acc:VGNC:26461]
ENSBTAG00000011954	3186.21	1.00509	0.255264	3.93745	8.23504e-05	0.00574758	SEC11C	SEC11 homolog C, signal peptidase complex subunit [Source:VGNC Symbol;Acc:VGNC:34402]
ENSBTAG00000011895	2780.66	0.710577	0.18055	3.93562	8.29825e-05	0.00576412	PANK3	pantothenate kinase 3 [Source:VGNC Symbol;Acc:VGNC:32565]
ENSBTAG00000021880	324.641	-1.6338	0.415312	-3.93392	8.35728e-05	0.00577761	COQ8A	coenzyme Q8A [Source:VGNC Symbol;Acc:VGNC:27616]
ENSBTAG00000010215	415.812	-1.31914	0.336178	-3.92393	8.71157e-05	0.00596599	CREB3L3	cAMP responsive element binding protein 3 like 3 [Source:VGNC Symbol;Acc:VGNC:27696]
ENSBTAG00000053965	230.743	1.60196	0.408142	3.925	8.67295e-05	0.00596599	ENSBTAG00000053965
ENSBTAG00000017091	1577.05	-0.961678	0.245529	-3.91676	8.97453e-05	0.00607625	CMTR1	cap methyltransferase 1 [Source:VGNC Symbol;Acc:VGNC:27489]
ENSBTAG00000033010	2850.06	-0.664101	0.169628	-3.91503	9.03919e-05	0.00607625	TTC27	tetratricopeptide repeat domain 27 [Source:VGNC Symbol;Acc:VGNC:36466]
ENSBTAG00000007842	988.961	0.79423	0.202694	3.91836	8.91519e-05	0.00607625	GCLM	glutamate-cysteine ligase modifier subunit [Source:VGNC Symbol;Acc:VGNC:29290]
ENSBTAG00000021822	236.369	1.18606	0.302945	3.9151	9.03651e-05	0.00607625	ARV1	ARV1 homolog, fatty acid homeostasis modulator [Source:VGNC Symbol;Acc:VGNC:26182]
ENSBTAG00000014135	34.4813	7.02187	1.79679	3.908	9.30628e-05	0.0062271	WDR17	WD repeat domain 17 [Source:VGNC Symbol;Acc:VGNC:36884]
ENSBTAG00000055158	708.966	1.16	0.29712	3.90417	9.45511e-05	0.00629779	TP53INP1	tumor protein p53 inducible nuclear protein 1 [Source:NCBI gene;Acc:782667]
ENSBTAG00000003521	288.122	-0.924357	0.237239	-3.89631	9.76707e-05	0.00641767	KIAA0895L	KIAA0895 like [Source:VGNC Symbol;Acc:VGNC:30558]
ENSBTAG00000004238	743.107	-0.865643	0.222156	-3.89656	9.75691e-05	0.00641767	TACC1	transforming acidic coiled-coil containing protein 1 [Source:VGNC Symbol;Acc:VGNC:35557]
ENSBTAG00000009048	292.658	1.63154	0.418588	3.89773	9.70989e-05	0.00641767	EFHD2	EF-hand domain family member D2 [Source:VGNC Symbol;Acc:VGNC:28353]
ENSBTAG00000005412	1638.84	1.45162	0.374181	3.87946	0.00010469	0.00684804	NEDD4L	NEDD4 like E3 ubiquitin protein ligase [Source:VGNC Symbol;Acc:VGNC:31983]
ENSBTAG00000044007	48.9467	-4.92131	1.27077	-3.8727	0.000107635	0.00700926	KLF12	Kruppel like factor 12 [Source:VGNC Symbol;Acc:VGNC:30628]
ENSBTAG00000008142	53.6158	-8.54832	2.21405	-3.86093	0.000112954	0.00726662	IFIH1	interferon induced with helicase C domain 1 [Source:VGNC Symbol;Acc:VGNC:30048]
ENSBTAG00000003349	550.55	-1.41427	0.366329	-3.86066	0.000113082	0.00726662	JAKMIP2	janus kinase and microtubule interacting protein 2 [Source:VGNC Symbol;Acc:VGNC:30368]
ENSBTAG00000020097	12514.6	0.893341	0.231335	3.86168	0.00011261	0.00726662	PERP	p53 apoptosis effector related to PMP22 [Source:NCBI gene;Acc:509485]
ENSBTAG00000020115	510.639	-1.0137	0.262735	-3.85827	0.000114191	0.00730569	UBE2O	ubiquitin conjugating enzyme E2 O [Source:VGNC Symbol;Acc:VGNC:36591]
ENSBTAG00000016851	2750.4	0.5795	0.150339	3.85461	0.000115915	0.00738366	RPS6KB1	ribosomal protein S6 kinase B1 [Source:VGNC Symbol;Acc:VGNC:34146]
ENSBTAG00000016073	3349.99	1.20539	0.312881	3.85256	0.000116891	0.00741343	UGCG	UDP-glucose ceramide glucosyltransferase [Source:VGNC Symbol;Acc:VGNC:36647]
ENSBTAG00000045500	42.2171	-3.43456	0.892024	-3.8503	0.000117972	0.0074496	SGSM2	small G protein signaling modulator 2 [Source:VGNC Symbol;Acc:VGNC:34551]
ENSBTAG00000005757	3859.49	-1.07607	0.280037	-3.8426	0.000121736	0.00765418	FUS	FUS RNA binding protein [Source:VGNC Symbol;Acc:VGNC:29147]
ENSBTAG00000015805	1051.88	-1.31331	0.341993	-3.84018	0.000122945	0.00766407	SIPA1L1	signal induced proliferation associated 1 like 1 [Source:VGNC Symbol;Acc:VGNC:34628]
ENSBTAG00000025372	5657.98	-0.554932	0.144504	-3.84024	0.000122912	0.00766407	RIOX1	ribosomal oxygenase 1 [Source:VGNC Symbol;Acc:VGNC:55141]
ENSBTAG00000021652	18.9475	-5.47801	1.42996	-3.83089	0.000127681	0.00792547	PDZD9	PDZ domain containing 9 [Source:VGNC Symbol;Acc:VGNC:32729]
ENSBTAG00000007195	1442.86	-1.70682	0.446031	-3.82669	0.000129876	0.00802069	GUCA2A	guanylate cyclase activator 2A [Source:VGNC Symbol;Acc:VGNC:29716]
ENSBTAG00000013225	2063.71	0.657721	0.171915	3.82586	0.000130315	0.00802069	NBN	nibrin [Source:VGNC Symbol;Acc:VGNC:31895]
ENSBTAG00000052305	416.536	1.1002	0.287927	3.82112	0.000132845	0.00814208	ENSBTAG00000052305
ENSBTAG00000030198	161.001	-2.35684	0.617256	-3.81825	0.000134402	0.00820301	TMEM232	transmembrane protein 232 [Source:VGNC Symbol;Acc:VGNC:36046]
ENSBTAG00000010504	8090.7	-0.885641	0.232053	-3.81655	0.000135329	0.00820813	TBRG4	transforming growth factor beta regulator 4 [Source:VGNC Symbol;Acc:VGNC:35664]
ENSBTAG00000053171	3001.59	1.07094	0.280642	3.81604	0.000135611	0.00820813	ENSBTAG00000053171
ENSBTAG00000012116	1227.74	-1.44707	0.379496	-3.81313	0.00013722	0.00827119	HNF4A	hepatocyte nuclear factor 4 alpha [Source:VGNC Symbol;Acc:VGNC:29891]
ENSBTAG00000006610	31.3775	-6.36879	1.67089	-3.81161	0.000138065	0.00828787	XRRA1	X-ray radiation resistance associated 1 [Source:VGNC Symbol;Acc:VGNC:37010]
ENSBTAG00000012846	22.1369	-7.99769	2.10088	-3.80682	0.000140763	0.0084152	KIAA1549L	KIAA1549 like [Source:VGNC Symbol;Acc:VGNC:30571]
ENSBTAG00000012519	518.297	-1.24097	0.32679	-3.79745	0.000146191	0.00868193	XDH	xanthine dehydrogenase [Source:VGNC Symbol;Acc:VGNC:36984]
ENSBTAG00000021058	1935.91	-0.934542	0.246122	-3.79707	0.000146415	0.00868193	DDX42	DEAD-box helicase 42 [Source:VGNC Symbol;Acc:VGNC:27968]
ENSBTAG00000049312	449.799	1.23908	0.326675	3.79301	0.000148833	0.00878957	ENSBTAG00000049312
ENSBTAG00000018941	33.007	8.84017	2.33425	3.78715	0.000152385	0.00896307	CPXM2	carboxypeptidase X, M14 family member 2 [Source:VGNC Symbol;Acc:VGNC:27682]
ENSBTAG00000000421	2903.92	0.920887	0.243272	3.78542	0.000153451	0.00898951	EEA1	early endosome antigen 1 [Source:VGNC Symbol;Acc:VGNC:54421]
ENSBTAG00000005999	822.205	-0.942133	0.248996	-3.78373	0.000154497	0.00901458	FSD1	fibronectin type III and SPRY domain containing 1 [Source:VGNC Symbol;Acc:VGNC:29129]
ENSBTAG00000011400	17963.2	-0.619464	0.163838	-3.78096	0.000156224	0.00904301	DBN1	drebrin 1 [Source:VGNC Symbol;Acc:VGNC:27890]
ENSBTAG00000018784	4111.35	1.34056	0.354524	3.7813	0.000156014	0.00904301	CTSZ	cathepsin Z [Source:VGNC Symbol;Acc:VGNC:27820]
ENSBTAG00000010721	9009.08	-1.00675	0.266388	-3.77925	0.000157302	0.00906942	MCM3	minichromosome maintenance complex component 3 [Source:VGNC Symbol;Acc:VGNC:31309]
ENSBTAG00000034998	757.68	-1.598	0.423214	-3.77587	0.000159448	0.00912105	SIMC1	SUMO interacting motifs containing 1 [Source:VGNC Symbol;Acc:VGNC:54482]
ENSBTAG00000007988	1265.64	-0.821722	0.217621	-3.77592	0.000159415	0.00912105	STX2	syntaxin 2 [Source:VGNC Symbol;Acc:VGNC:35438]
ENSBTAG00000000602	328.38	-1.35486	0.358953	-3.77448	0.00016034	0.00913624	RXRB	retinoid X receptor beta [Source:VGNC Symbol;Acc:VGNC:34231]
ENSBTAG00000001027	1511	-1.26235	0.334887	-3.76948	0.000163591	0.0092556	SERPINH1	serpin family H member 1 [Source:VGNC Symbol;Acc:VGNC:34480]
ENSBTAG00000019116	1214.86	0.850349	0.225598	3.7693	0.000163704	0.0092556	MOB4	MOB family member 4, phocein [Source:NCBI gene;Acc:781884]
ENSBTAG00000012946	2121.3	0.813988	0.216042	3.76774	0.000164733	0.00927785	HSF2	heat shock transcription factor 2 [Source:VGNC Symbol;Acc:VGNC:29982]
ENSBTAG00000038323	4114.62	1.37836	0.366908	3.7567	0.000172171	0.00965947	GLYAT	glycine-N-acyltransferase [Source:NCBI gene;Acc:281787]
ENSBTAG00000018077	867.515	1.90016	0.506063	3.75479	0.000173487	0.00969602	LYPD3	LY6/PLAUR domain containing 3 [Source:VGNC Symbol;Acc:VGNC:31101]
ENSBTAG00000013251	2939.69	-0.83214	0.221869	-3.75059	0.000176416	0.00982207	HDGFL2	HDGF like 2 [Source:NCBI gene;Acc:512959]
ENSBTAG00000010727	647.939	-0.687089	0.183545	-3.74344	0.000181517	0.0100677	ATG4D	autophagy related 4D cysteine peptidase [Source:VGNC Symbol;Acc:VGNC:26260]
ENSBTAG00000021687	294.715	-1.89407	0.506639	-3.73849	0.000185126	0.0102289	JADE2	jade family PHD finger 2 [Source:VGNC Symbol;Acc:VGNC:30359]
ENSBTAG00000010221	1744.15	0.811041	0.21704	3.73682	0.00018636	0.0102582	CCDC93	coiled-coil domain containing 93 [Source:VGNC Symbol;Acc:VGNC:26934]
ENSBTAG00000020536	27.2648	-8.06929	2.16291	-3.73076	0.000190905	0.0104482	HERC6	HECT and RLD domain containing E3 ubiquitin protein ligase family member 6 [Source:VGNC Symbol;Acc:VGNC:29815]
ENSBTAG00000002643	1153.3	-0.852198	0.228482	-3.72982	0.000191618	0.0104482	VPS52	VPS52 subunit of GARP complex [Source:VGNC Symbol;Acc:VGNC:36828]
ENSBTAG00000013627	30588	-0.642538	0.172291	-3.72937	0.00019196	0.0104482	HNRNPAB	heterogeneous nuclear ribonucleoprotein A/B [Source:VGNC Symbol;Acc:VGNC:52241]
ENSBTAG00000025494	53.3897	-7.53844	2.02645	-3.72001	0.000199212	0.010541	PAQR8	progestin and adipoQ receptor family member 8 [Source:VGNC Symbol;Acc:VGNC:32580]
ENSBTAG00000011375	153.998	-1.89637	0.509469	-3.72224	0.00019746	0.010541	SHC3	SHC adaptor protein 3 [Source:VGNC Symbol;Acc:VGNC:34591]
ENSBTAG00000000462	296.566	-1.2372	0.332772	-3.71787	0.000200912	0.010541	CCDC102A	coiled-coil domain containing 102A [Source:VGNC Symbol;Acc:VGNC:26829]
ENSBTAG00000006422	9528.48	-0.864302	0.232579	-3.71617	0.000202263	0.010541	TRIM28	tripartite motif containing 28 [Source:VGNC Symbol;Acc:VGNC:36324]
ENSBTAG00000014788	7929.13	-0.746486	0.200506	-3.72302	0.000196858	0.010541	AKAP12	A-kinase anchoring protein 12 [Source:VGNC Symbol;Acc:VGNC:25782]
ENSBTAG00000015602	1141.48	-0.715845	0.192342	-3.72173	0.000197863	0.010541	MRNIP	MRN complex interacting protein [Source:VGNC Symbol;Acc:VGNC:52861]
ENSBTAG00000006099	3310.74	-0.708529	0.190687	-3.71567	0.000202667	0.010541	PIP5K1A	phosphatidylinositol-4-phosphate 5-kinase type 1 alpha [Source:VGNC Symbol;Acc:VGNC:55656]
ENSBTAG00000020459	2697.43	-0.633727	0.170499	-3.71689	0.000201691	0.010541	TIMELESS	timeless circadian regulator [Source:VGNC Symbol;Acc:VGNC:35869]
ENSBTAG00000014649	1770.05	-0.630859	0.169812	-3.71504	0.00020317	0.010541	CPT2	carnitine palmitoyltransferase 2 [Source:VGNC Symbol;Acc:VGNC:27679]
ENSBTAG00000018405	3523.7	-0.628476	0.168795	-3.72331	0.000196632	0.010541	MARS1	methionyl-tRNA synthetase 1 [Source:VGNC Symbol;Acc:VGNC:31250]
ENSBTAG00000021586	780.76	0.687175	0.184985	3.71476	0.000203395	0.010541	FAM122A	family with sequence similarity 122A [Source:VGNC Symbol;Acc:VGNC:28722]
ENSBTAG00000009299	1459.46	0.924141	0.248705	3.71582	0.000202545	0.010541	AFTPH	aftiphilin [Source:VGNC Symbol;Acc:VGNC:25718]
ENSBTAG00000017245	684.048	1.02819	0.27682	3.71428	0.000203782	0.010541	COPG2	COPI coat complex subunit gamma 2 [Source:VGNC Symbol;Acc:VGNC:27597]
ENSBTAG00000038156	397.726	1.09108	0.292852	3.72571	0.000194763	0.010541	DYNLT3	dynein light chain Tctex-type 3 [Source:VGNC Symbol;Acc:VGNC:28278]
ENSBTAG00000007898	53.7363	-2.29033	0.616803	-3.71323	0.000204634	0.0105477	CYBRD1	cytochrome b reductase 1 [Source:VGNC Symbol;Acc:VGNC:49050]
ENSBTAG00000001368	1602.51	1.2641	0.340949	3.70761	0.000209227	0.0107465	LGALS3BP	galectin 3 binding protein [Source:VGNC Symbol;Acc:VGNC:30853]
ENSBTAG00000010777	5145.92	-0.644998	0.174066	-3.70547	0.000210996	0.0107993	CARS1	cysteinyl-tRNA synthetase 1 [Source:VGNC Symbol;Acc:VGNC:26773]
ENSBTAG00000012629	15.3133	-6.75306	1.82659	-3.69708	0.000218095	0.0110848	ZNF362	zinc finger protein 362 [Source:VGNC Symbol;Acc:VGNC:37258]
ENSBTAG00000019414	2703.01	0.840851	0.227406	3.69757	0.000217675	0.0110848	CLK4	CDC like kinase 4 [Source:VGNC Symbol;Acc:VGNC:27451]
ENSBTAG00000030499	1062.06	1.01387	0.274696	3.69086	0.000223496	0.0113199	ENSBTAG00000030499	diaphanous related formin 1 [Source:NCBI gene;Acc:786565]
ENSBTAG00000037673	15.5855	-7.26667	1.97512	-3.6791	0.000234055	0.0118137	GSTM1	glutathione S-transferase mu 1 [Source:NCBI gene;Acc:783879]
ENSBTAG00000001575	66512.9	0.632845	0.172141	3.67632	0.000236623	0.0119021	CALM2	calmodulin 2 [Source:NCBI gene;Acc:100297344]
ENSBTAG00000027453	9712.42	-0.662694	0.180491	-3.67163	0.000241013	0.0120813	RNF4	ring finger protein 4 [Source:VGNC Symbol;Acc:VGNC:34065]
ENSBTAG00000003397	8465.28	-0.531794	0.145041	-3.66651	0.000245888	0.0122645	CTBP2	C-terminal binding protein 2 [Source:VGNC Symbol;Acc:VGNC:55942]
ENSBTAG00000016250	1949.03	1.1384	0.310527	3.66603	0.000246349	0.0122645	AKTIP	AKT interacting protein [Source:VGNC Symbol;Acc:VGNC:25801]
ENSBTAG00000048798	2195.57	0.892332	0.24369	3.66175	0.000250502	0.0123867	ENSBTAG00000048798	KIAA1109 ortholog [Source:NCBI gene;Acc:100297914]
ENSBTAG00000008734	2603.12	0.919509	0.251099	3.66193	0.00025032	0.0123867	PM20D1	peptidase M20 domain containing 1 [Source:VGNC Symbol;Acc:VGNC:33066]
ENSBTAG00000011585	23.1098	-4.25885	1.16404	-3.65868	0.000253516	0.0124112	MST1	macrophage stimulating 1 [Source:NCBI gene;Acc:514667]
ENSBTAG00000004995	933.857	1.20481	0.329304	3.65865	0.00025355	0.0124112	C1GALT1	core 1 synthase, glycoprotein-N-acetylgalactosamine 3-beta-galactosyltransferase 1 [Source:VGNC Symbol;Acc:VGNC:26615]
ENSBTAG00000015381	1059.59	1.80955	0.494422	3.65992	0.00025229	0.0124112	ARHGAP18	Rho GTPase activating protein 18 [Source:VGNC Symbol;Acc:VGNC:26078]
ENSBTAG00000012387	103.378	1.65378	0.452135	3.65772	0.000254471	0.0124146	PAM	peptidylglycine alpha-amidating monooxygenase [Source:VGNC Symbol;Acc:VGNC:32561]
ENSBTAG00000032642	134.111	4.04113	1.10512	3.65672	0.000255461	0.0124214	GSTA3	glutathione S-transferase, alpha 3 [Source:NCBI gene;Acc:768055]
ENSBTAG00000001700	5323.96	0.581694	0.159317	3.65117	0.000261046	0.0126089	CDC42	cell division cycle 42 [Source:NCBI gene;Acc:532712]
ENSBTAG00000009368	1151.94	0.726742	0.199023	3.65155	0.000260661	0.0126089	RRAGC	Ras related GTP binding C [Source:VGNC Symbol;Acc:VGNC:34160]
ENSBTAG00000016621	1643.78	-0.672801	0.184343	-3.64973	0.000262517	0.0126376	NCBP3	nuclear cap binding subunit 3 [Source:VGNC Symbol;Acc:VGNC:31909]
ENSBTAG00000015986	2349.97	-0.670318	0.183704	-3.64889	0.000263373	0.0126376	NDE1	nudE neurodevelopment protein 1 [Source:VGNC Symbol;Acc:VGNC:31932]
ENSBTAG00000006474	49059.1	0.631613	0.17315	3.64779	0.00026451	0.0126505	EPCAM	epithelial cell adhesion molecule [Source:VGNC Symbol;Acc:VGNC:28529]
ENSBTAG00000015904	55.6349	2.46872	0.67737	3.64457	0.000267842	0.012768	RORA	RAR related orphan receptor A [Source:VGNC Symbol;Acc:VGNC:34088]
ENSBTAG00000024450	4231.65	-0.610365	0.167652	-3.64066	0.00027194	0.0128792	MAP2K2	mitogen-activated protein kinase kinase 2 [Source:VGNC Symbol;Acc:VGNC:55215]
ENSBTAG00000000260	550.913	1.06147	0.291503	3.64135	0.000271207	0.0128792	ZNRF2	zinc and ring finger 2 [Source:VGNC Symbol;Acc:VGNC:37364]
ENSBTAG00000007550	414.283	-1.26812	0.348445	-3.63938	0.000273296	0.0129015	OLFM2	olfactomedin 2 [Source:VGNC Symbol;Acc:VGNC:32418]
ENSBTAG00000013957	2060.63	0.878716	0.241705	3.63549	0.000277453	0.0130555	GALNT3	polypeptide N-acetylgalactosaminyltransferase 3 [Source:VGNC Symbol;Acc:VGNC:29232]
ENSBTAG00000008158	1666.07	1.04415	0.287296	3.63441	0.000278619	0.0130682	CCDC68	coiled-coil domain containing 68 [Source:VGNC Symbol;Acc:VGNC:26910]
ENSBTAG00000019229	730.462	1.97234	0.542902	3.63296	0.000280187	0.0130997	TMEM144	transmembrane protein 144 [Source:VGNC Symbol;Acc:VGNC:35976]
ENSBTAG00000003981	2469.7	-0.675462	0.185981	-3.63189	0.00028135	0.013112	RRP1	ribosomal RNA processing 1 [Source:VGNC Symbol;Acc:VGNC:34168]
ENSBTAG00000017574	13896.5	-0.780917	0.215165	-3.62939	0.000284093	0.0131976	LMNA	lamin A/C [Source:VGNC Symbol;Acc:VGNC:30929]
ENSBTAG00000049832	2303.74	1.08952	0.300671	3.62361	0.000290515	0.0134532	ENSBTAG00000049832
ENSBTAG00000002580	62.0348	-2.5269	0.697618	-3.62219	0.000292122	0.0134848	MYH14	myosin heavy chain 14 [Source:VGNC Symbol;Acc:VGNC:31796]
ENSBTAG00000001021	4615.35	-2.9299	0.80923	-3.6206	0.000293919	0.0135249	CYP1A1	cytochrome P450, subfamily I (aromatic compound-inducible), polypeptide 1 [Source:NCBI gene;Acc:282870]
ENSBTAG00000014343	630.595	-0.729527	0.201644	-3.6179	0.000297004	0.0135855	IFT22	intraflagellar transport 22 [Source:VGNC Symbol;Acc:VGNC:30067]
ENSBTAG00000002608	10998.4	-0.345727	0.0955625	-3.61782	0.000297099	0.0135855	SEPTIN2	septin 2 [Source:VGNC Symbol;Acc:VGNC:34454]
ENSBTAG00000008583	393.088	-1.78241	0.492823	-3.61673	0.000298349	0.0136	PALD1	phosphatase domain containing paladin 1 [Source:VGNC Symbol;Acc:VGNC:50088]
ENSBTAG00000020495	780.084	1.6261	0.449803	3.61514	0.000300182	0.013641	SH3YL1	SH3 and SYLF domain containing 1 [Source:VGNC Symbol;Acc:VGNC:34584]
ENSBTAG00000016319	397.862	-1.17251	0.324475	-3.61356	0.000302017	0.0136817	CYB5D2	cytochrome b5 domain containing 2 [Source:VGNC Symbol;Acc:VGNC:50262]
ENSBTAG00000012849	4074.84	-1.04651	0.290434	-3.60324	0.000314271	0.0141149	COL4A1	collagen type IV alpha 1 chain [Source:VGNC Symbol;Acc:VGNC:50081]
ENSBTAG00000022160	5980.52	-0.678744	0.188368	-3.60329	0.000314212	0.0141149	NAP1L4	nucleosome assembly protein 1 like 4 [Source:VGNC Symbol;Acc:VGNC:31879]
ENSBTAG00000015277	3634.23	-0.630406	0.174964	-3.60307	0.000314481	0.0141149	PCF11	PCF11 cleavage and polyadenylation factor subunit [Source:VGNC Symbol;Acc:VGNC:32625]
ENSBTAG00000001795	5149.54	-0.833443	0.231673	-3.59749	0.000321298	0.0143256	LONP1	lon peptidase 1, mitochondrial [Source:VGNC Symbol;Acc:VGNC:30947]
ENSBTAG00000006883	8521.91	0.544661	0.151394	3.59764	0.000321117	0.0143256	EIF4B	eukaryotic translation initiation factor 4B [Source:VGNC Symbol;Acc:VGNC:28407]
ENSBTAG00000005371	4305.83	0.549905	0.152886	3.59683	0.000322121	0.0143256	DPAGT1	dolichyl-phosphate N-acetylglucosaminephosphotransferase 1 [Source:VGNC Symbol;Acc:VGNC:28174]
ENSBTAG00000010543	6937.84	-0.937497	0.260806	-3.59461	0.000324878	0.0143632	FGFR4	fibroblast growth factor receptor 4 [Source:VGNC Symbol;Acc:VGNC:28988]
ENSBTAG00000050948	1747.12	-0.849924	0.236447	-3.59456	0.000324938	0.0143632	NUP62	nucleoporin 62 [Source:NCBI gene;Acc:100138517]
ENSBTAG00000030965	8903.16	-0.873364	0.243028	-3.59368	0.000326035	0.0143682	MCM7	minichromosome maintenance complex component 7 [Source:VGNC Symbol;Acc:VGNC:31313]
ENSBTAG00000009153	41.9135	3.14138	0.874482	3.59227	0.000327804	0.0144027	MLXIPL	MLX interacting protein like [Source:VGNC Symbol;Acc:VGNC:31510]
ENSBTAG00000021008	15.0012	-6.78894	1.89525	-3.58207	0.000340878	0.0149321	ZNF219	zinc finger protein 219 [Source:VGNC Symbol;Acc:VGNC:37229]
ENSBTAG00000016743	2779.12	-0.485485	0.135605	-3.58013	0.000343427	0.0149987	DNTTIP1	deoxynucleotidyltransferase terminal interacting protein 1 [Source:VGNC Symbol;Acc:VGNC:28151]
ENSBTAG00000005718	14943.3	-0.878777	0.245652	-3.57732	0.000347131	0.0150354	PLIN2	perilipin 2 [Source:VGNC Symbol;Acc:VGNC:33030]
ENSBTAG00000004916	1752.47	-0.73856	0.206423	-3.5779	0.000346364	0.0150354	ARFGAP1	ADP ribosylation factor GTPase activating protein 1 [Source:VGNC Symbol;Acc:VGNC:56176]
ENSBTAG00000016967	1712.38	-0.612264	0.17116	-3.57715	0.000347359	0.0150354	RARS2	arginyl-tRNA synthetase 2, mitochondrial [Source:VGNC Symbol;Acc:VGNC:33734]
ENSBTAG00000001204	94.0665	-1.78406	0.498894	-3.57603	0.000348849	0.0150552	JCAD	junctional cadherin 5 associated [Source:VGNC Symbol;Acc:VGNC:56189]
ENSBTAG00000016529	1120.22	1.29166	0.361637	3.5717	0.00035467	0.0152591	SLC25A30	solute carrier family 25 member 30 [Source:VGNC Symbol;Acc:VGNC:34756]
ENSBTAG00000037728	415.917	1.95488	0.547436	3.57097	0.000355666	0.0152591	PAGE4	PAGE family member 4 [Source:VGNC Symbol;Acc:VGNC:50182]
ENSBTAG00000008148	2303.65	-0.846035	0.237	-3.56977	0.000357291	0.0152839	GCM1	glial cells missing transcription factor 1 [Source:VGNC Symbol;Acc:VGNC:29291]
ENSBTAG00000002068	31279.8	0.706624	0.1981	3.56701	0.000361083	0.015399	TAGLN2	transgelin 2 [Source:VGNC Symbol;Acc:VGNC:35586]
ENSBTAG00000016748	12211.3	1.17259	0.328801	3.56627	0.000362093	0.015399	ENSBTAG00000016748	intestinal alkaline phosphatase VII [Source:NCBI gene;Acc:516378]
ENSBTAG00000020196	268.358	3.57546	1.00306	3.56457	0.000364459	0.0154545	ENPP3	ectonucleotide pyrophosphatase/phosphodiesterase 3 [Source:VGNC Symbol;Acc:VGNC:28506]
ENSBTAG00000010671	224.868	-1.56963	0.440835	-3.56058	0.000370037	0.0156456	GLI3	GLI family zinc finger 3 [Source:VGNC Symbol;Acc:VGNC:29401]
ENSBTAG00000021523	10105.8	-0.965399	0.271373	-3.55746	0.000374455	0.0156959	STAT3	signal transducer and activator of transcription 3 [Source:VGNC Symbol;Acc:VGNC:35371]
ENSBTAG00000018689	3641.1	-0.613501	0.172391	-3.55878	0.000372587	0.0156959	LIG3	DNA ligase 3 [Source:VGNC Symbol;Acc:VGNC:30883]
ENSBTAG00000007253	897.215	1.57786	0.443518	3.55761	0.000374251	0.0156959	TSPAN33	tetraspanin 33 [Source:VGNC Symbol;Acc:VGNC:36438]
ENSBTAG00000015128	85.0442	-1.87691	0.527729	-3.55659	0.000375702	0.015703	KLK8	kallikrein related peptidase 8 [Source:VGNC Symbol;Acc:VGNC:30682]
ENSBTAG00000016595	5457.57	0.845973	0.23815	3.55227	0.000381921	0.0159174	CYSTM1	cysteine rich transmembrane module containing 1 [Source:VGNC Symbol;Acc:VGNC:50308]
ENSBTAG00000020657	1321.37	1.19604	0.337157	3.54744	0.000388993	0.0161659	FAT1	FAT atypical cadherin 1 [Source:VGNC Symbol;Acc:VGNC:52771]
ENSBTAG00000014295	16778.9	0.53739	0.151671	3.54313	0.000395414	0.0163861	CAPZA1	capping actin protein of muscle Z-line subunit alpha 1 [Source:VGNC Symbol;Acc:VGNC:26756]
ENSBTAG00000009109	296.533	1.39979	0.395345	3.54067	0.000399117	0.0164927	CASD1	CAS1 domain containing 1 [Source:VGNC Symbol;Acc:VGNC:26775]
ENSBTAG00000033319	42.8086	-7.24563	2.04691	-3.53978	0.00040046	0.0165014	CD200	CD200 molecule [Source:VGNC Symbol;Acc:VGNC:27010]
ENSBTAG00000017240	331.719	-1.29636	0.366999	-3.53233	0.00041191	0.0169254	DGKQ	diacylglycerol kinase theta [Source:VGNC Symbol;Acc:VGNC:28031]
ENSBTAG00000031340	10572.9	-0.923336	0.261505	-3.53085	0.000414231	0.016973	SLC6A20	solute carrier family 6 member 20 [Source:VGNC Symbol;Acc:VGNC:34921]
ENSBTAG00000006886	1514.77	-1.0854	0.307646	-3.52807	0.000418602	0.0170088	FAM117A	family with sequence similarity 117 member A [Source:VGNC Symbol;Acc:VGNC:28719]
ENSBTAG00000010729	2044.18	-0.749059	0.212288	-3.5285	0.000417928	0.0170088	KRI1	KRI1 homolog [Source:VGNC Symbol;Acc:VGNC:30713]
ENSBTAG00000013309	3541.6	-0.635274	0.180049	-3.52834	0.000418182	0.0170088	SRSF4	serine and arginine rich splicing factor 4 [Source:VGNC Symbol;Acc:VGNC:35302]
ENSBTAG00000006613	3167.3	-0.729578	0.207013	-3.52431	0.00042458	0.0171815	METTL17	methyltransferase like 17 [Source:VGNC Symbol;Acc:VGNC:55124]
ENSBTAG00000007402	1238.7	0.90745	0.257511	3.52392	0.000425208	0.0171815	ZFAND2A	zinc finger AN1-type containing 2A [Source:VGNC Symbol;Acc:VGNC:37149]
ENSBTAG00000017198	15.7761	-6.81713	1.93569	-3.52182	0.000428602	0.0172708	CHRNA4	cholinergic receptor nicotinic alpha 4 subunit [Source:VGNC Symbol;Acc:VGNC:27326]
ENSBTAG00000018474	8063.34	-0.725844	0.20638	-3.51703	0.000436411	0.017537	IL6R	interleukin 6 receptor [Source:VGNC Symbol;Acc:VGNC:30167]
ENSBTAG00000013270	1194.71	-0.551425	0.156855	-3.51551	0.000438903	0.0175887	TTC19	tetratricopeptide repeat domain 19 [Source:VGNC Symbol;Acc:VGNC:36458]
ENSBTAG00000019810	13276.2	-0.660382	0.1879	-3.51455	0.000440502	0.0176044	AARS1	alanyl-tRNA synthetase 1 [Source:VGNC Symbol;Acc:VGNC:25448]
ENSBTAG00000008468	509.118	-0.90129	0.256535	-3.51332	0.000442547	0.0176378	AGAP3	ArfGAP with GTPase domain, ankyrin repeat and PH domain 3 [Source:VGNC Symbol;Acc:VGNC:25721]
ENSBTAG00000020896	13.3622	-6.66598	1.89916	-3.50995	0.000448183	0.0177654	GRIFIN	galectin-related inter-fiber protein [Source:VGNC Symbol;Acc:VGNC:29642]
ENSBTAG00000016442	484.716	1.46381	0.416959	3.51068	0.000446967	0.0177654	MAP4K3	mitogen-activated protein kinase kinase kinase kinase 3 [Source:VGNC Symbol;Acc:VGNC:31206]
ENSBTAG00000021810	2149.8	-0.572066	0.163169	-3.50597	0.000454945	0.0179845	DDX23	DEAD-box helicase 23 [Source:VGNC Symbol;Acc:VGNC:27959]
ENSBTAG00000008160	639.768	1.16309	0.331907	3.50427	0.000457859	0.0180508	MBOAT2	membrane bound O-acyltransferase domain containing 2 [Source:VGNC Symbol;Acc:VGNC:31287]
ENSBTAG00000053638	156.951	1.16666	0.333688	3.49626	0.000471837	0.0185018	ENSBTAG00000053638
ENSBTAG00000015337	219.641	1.86011	0.53196	3.4967	0.000471043	0.0185018	TSPAN12	tetraspanin 12 [Source:VGNC Symbol;Acc:VGNC:36427]
ENSBTAG00000006995	1168.38	-1.23768	0.354205	-3.49424	0.000475421	0.0185924	SPTBN1	spectrin beta, non-erythrocytic 1 [Source:VGNC Symbol;Acc:VGNC:35253]
ENSBTAG00000016819	24025.6	-0.981252	0.281027	-3.49166	0.000480023	0.0187222	FABP3	fatty acid binding protein 3 [Source:VGNC Symbol;Acc:VGNC:28697]
ENSBTAG00000016435	1037.6	-0.835075	0.23926	-3.49024	0.000482593	0.0187317	NOM1	nucleolar protein with MIF4G domain 1 [Source:VGNC Symbol;Acc:VGNC:32162]
ENSBTAG00000017992	7257.24	0.5316	0.152317	3.4901	0.000482836	0.0187317	CD164	CD164 molecule [Source:VGNC Symbol;Acc:VGNC:27004]
ENSBTAG00000051481	24.9162	-6.82325	1.95606	-3.48827	0.000486166	0.0188109	FAM200A	family with sequence similarity 200 member A [Source:HGNC Symbol;Acc:HGNC:25401]
ENSBTAG00000047418	18821.2	-0.598019	0.171542	-3.48614	0.000490044	0.0189108	SLC25A6	solute carrier family 25 member 6 [Source:VGNC Symbol;Acc:VGNC:49967]
ENSBTAG00000012757	2211.71	2.15897	0.619682	3.484	0.000493978	0.0190123	GCNT1	glucosaminyl (N-acetyl) transferase 1 [Source:VGNC Symbol;Acc:VGNC:56968]
ENSBTAG00000002603	3783.12	0.886216	0.254498	3.48222	0.000497279	0.019089	PRPF39	pre-mRNA processing factor 39 [Source:VGNC Symbol;Acc:VGNC:33377]
ENSBTAG00000002051	1330.29	-1.1355	0.326277	-3.48016	0.000501105	0.0190954	ARAP1	ArfGAP with RhoGAP domain, ankyrin repeat and PH domain 1 [Source:NCBI gene;Acc:511889]
ENSBTAG00000007952	3098.7	-0.96957	0.278642	-3.47963	0.000502108	0.0190954	MVP	major vault protein [Source:VGNC Symbol;Acc:VGNC:31769]
ENSBTAG00000054418	255.394	1.23604	0.355192	3.47993	0.000501549	0.0190954	ENSBTAG00000054418	endogenous retrovirus group K member 6 Gag polyprotein-like [Source:NCBI gene;Acc:112444529]
ENSBTAG00000051295	1918.84	1.58677	0.456058	3.47932	0.000502683	0.0190954	FXYD4	FXYD domain containing ion transport regulator 4 [Source:NCBI gene;Acc:100295639]
ENSBTAG00000019937	3507	-0.445793	0.128169	-3.47816	0.000504873	0.0191288	WDR3	WD repeat domain 3 [Source:VGNC Symbol;Acc:VGNC:36890]
ENSBTAG00000050696	4900.65	-0.545291	0.156896	-3.47549	0.000509923	0.0191707	KLHDC3	kelch domain containing 3 [Source:NCBI gene;Acc:541138]
ENSBTAG00000043561	237795	0.835042	0.240206	3.47636	0.000508262	0.0191707	COX1	cytochrome c oxidase subunit I [Source:NCBI gene;Acc:3283879]
ENSBTAG00000002245	258.75	2.1879	0.629473	3.47577	0.000509394	0.0191707	MRGPRX2	MAS related GPR family member X2 [Source:NCBI gene;Acc:516646]
ENSBTAG00000010238	123.476	-2.54309	0.732019	-3.47407	0.000512619	0.0192226	LTB4R	leukotriene B4 receptor [Source:VGNC Symbol;Acc:VGNC:31069]
ENSBTAG00000013329	467.382	-1.01437	0.292069	-3.47305	0.000514571	0.0192463	AP1M1	adaptor related protein complex 1 subunit mu 1 [Source:VGNC Symbol;Acc:VGNC:25979]
ENSBTAG00000002126	213.363	-1.72121	0.496769	-3.46481	0.000530612	0.0197879	PFKFB2	6-phosphofructo-2-kinase/fructose-2,6-biphosphatase 2 [Source:VGNC Symbol;Acc:VGNC:32770]
ENSBTAG00000011880	1531.67	-0.835297	0.241121	-3.46422	0.000531765	0.0197879	CHAF1B	chromatin assembly factor 1 subunit B [Source:VGNC Symbol;Acc:VGNC:27267]
ENSBTAG00000011389	382.952	1.31183	0.378795	3.46317	0.000533849	0.0198149	TMEM104	transmembrane protein 104 [Source:VGNC Symbol;Acc:VGNC:55876]
ENSBTAG00000007865	11410.4	0.6572	0.190223	3.4549	0.000550497	0.020381	GNPDA1	glucosamine-6-phosphate deaminase 1 [Source:VGNC Symbol;Acc:VGNC:29476]
ENSBTAG00000002233	486.519	-1.22194	0.353842	-3.45335	0.000553677	0.0204468	CPNE2	copine 2 [Source:VGNC Symbol;Acc:VGNC:27659]
ENSBTAG00000000297	2409.88	-0.462542	0.133975	-3.45245	0.000555515	0.0204629	ZNF330	zinc finger protein 330 [Source:NCBI gene;Acc:533230]
ENSBTAG00000013320	98.9324	-1.77092	0.513571	-3.44825	0.000564229	0.0206374	TSPAN1	tetraspanin 1 [Source:VGNC Symbol;Acc:VGNC:36425]
ENSBTAG00000031792	1711.64	-0.686901	0.19921	-3.44812	0.000564498	0.0206374	ZNRD1	zinc ribbon domain containing 1 [Source:VGNC Symbol;Acc:VGNC:37362]
ENSBTAG00000017021	12639.2	-0.648933	0.188125	-3.44947	0.000561685	0.0206374	MCM4	minichromosome maintenance complex component 4 [Source:NCBI gene;Acc:504367]
ENSBTAG00000021254	1194.16	1.09474	0.31769	3.44595	0.000569049	0.0207518	CENPI	centromere protein I [Source:VGNC Symbol;Acc:VGNC:27178]
ENSBTAG00000012678	2263.02	-1.05252	0.305612	-3.44398	0.000573218	0.0208517	COLGALT1	collagen beta(1-O)galactosyltransferase 1 [Source:VGNC Symbol;Acc:VGNC:53572]
ENSBTAG00000013528	1279.3	-1.07962	0.3138	-3.44046	0.00058072	0.0210721	CHMP7	charged multivesicular body protein 7 [Source:VGNC Symbol;Acc:VGNC:27306]
ENSBTAG00000002746	6694.68	1.21171	0.352317	3.43925	0.000583322	0.0210964	OSTF1	osteoclast stimulating factor 1 [Source:VGNC Symbol;Acc:VGNC:32479]
ENSBTAG00000001652	24.7942	7.97689	2.31967	3.43881	0.000584285	0.0210964	SLCO3A1	solute carrier organic anion transporter family member 3A1 [Source:VGNC Symbol;Acc:VGNC:34953]
ENSBTAG00000023007	293.633	1.85819	0.540886	3.43546	0.00059155	0.021306	ENSBTAG00000023007	sodium/glucose cotransporter 1-like [Source:NCBI gene;Acc:531152]
ENSBTAG00000013099	899.077	1.09889	0.32004	3.4336	0.00059562	0.0213998	ALDOC	aldolase, fructose-bisphosphate C [Source:VGNC Symbol;Acc:VGNC:25823]
ENSBTAG00000000855	1607.86	-0.448372	0.130682	-3.43102	0.000601326	0.0215517	NXN	nucleoredoxin [Source:VGNC Symbol;Acc:VGNC:32376]
ENSBTAG00000016709	420.597	1.05345	0.30712	3.43009	0.000603389	0.0215726	NT5C3A	5'-nucleotidase, cytosolic IIIA [Source:VGNC Symbol;Acc:VGNC:32292]
ENSBTAG00000003358	8427.16	0.938733	0.273905	3.42722	0.00060979	0.0216424	MCFD2	multiple coagulation factor deficiency 2 [Source:VGNC Symbol;Acc:VGNC:31304]
ENSBTAG00000001475	310.876	1.04034	0.303515	3.42766	0.000608818	0.0216424	MCUR1	mitochondrial calcium uniporter regulator 1 [Source:VGNC Symbol;Acc:VGNC:31327]
ENSBTAG00000001819	373.635	1.74367	0.508706	3.42767	0.000608795	0.0216424	CDX2	caudal type homeobox 2 [Source:NCBI gene;Acc:618679]
ENSBTAG00000033731	873.849	0.894847	0.261207	3.42582	0.000612951	0.0217017	PRCP	prolylcarboxypeptidase [Source:VGNC Symbol;Acc:VGNC:33287]
ENSBTAG00000043949	214.978	1.64625	0.480738	3.42443	0.000616084	0.0217599	PAWR	pro-apoptotic WT1 regulator [Source:NCBI gene;Acc:532789]
ENSBTAG00000009831	349.863	-1.62388	0.474545	-3.42197	0.000621687	0.0217953	OCA2	OCA2 melanosomal transmembrane protein [Source:VGNC Symbol;Acc:VGNC:50237]
ENSBTAG00000009124	1800.69	-1.02006	0.29818	-3.42094	0.00062404	0.0217953	FEZ1	fasciculation and elongation protein zeta 1 [Source:VGNC Symbol;Acc:VGNC:28957]
ENSBTAG00000007066	1927.39	-0.634792	0.185678	-3.41877	0.00062904	0.0217953	TMTC4	transmembrane O-mannosyltransferase targeting cadherins 4 [Source:VGNC Symbol;Acc:VGNC:36148]
ENSBTAG00000002716	3905.27	-0.543811	0.159041	-3.41932	0.000627787	0.0217953	NOL10	nucleolar protein 10 [Source:VGNC Symbol;Acc:VGNC:32154]
ENSBTAG00000007399	55367.4	0.620137	0.181315	3.42022	0.000625697	0.0217953	LAMP2	lysosomal associated membrane protein 2 [Source:VGNC Symbol;Acc:VGNC:30776]
ENSBTAG00000014653	3012.93	0.652275	0.190671	3.42096	0.000624016	0.0217953	SPNS1	sphingolipid transporter 1 (putative) [Source:NCBI gene;Acc:505997]
ENSBTAG00000016548	206.94	1.06295	0.310756	3.42054	0.00062496	0.0217953	TEX12	testis expressed 12 [Source:VGNC Symbol;Acc:VGNC:35761]
ENSBTAG00000047325	16.9213	2.70988	0.792469	3.41955	0.000627256	0.0217953	GNGT2	G protein subunit gamma transducin 2 [Source:VGNC Symbol;Acc:VGNC:29471]
ENSBTAG00000001888	1952.12	0.732342	0.21433	3.41689	0.000633414	0.0218948	MED13L	mediator complex subunit 13L [Source:VGNC Symbol;Acc:VGNC:31351]
ENSBTAG00000005854	5196.56	-0.440222	0.128923	-3.41462	0.000638712	0.0219738	COPS8	COP9 signalosome subunit 8 [Source:VGNC Symbol;Acc:VGNC:27606]
ENSBTAG00000045581	638.463	1.29911	0.380407	3.41506	0.000637691	0.0219738	ENSBTAG00000045581
ENSBTAG00000018660	142.139	-1.37168	0.402088	-3.41139	0.000646316	0.0221532	PPP6R2	protein phosphatase 6 regulatory subunit 2 [Source:VGNC Symbol;Acc:VGNC:33274]
ENSBTAG00000019938	655.429	1.1619	0.340622	3.41112	0.000646964	0.0221532	N4BP1	NEDD4 binding protein 1 [Source:VGNC Symbol;Acc:VGNC:31852]
ENSBTAG00000054566	19.5901	-7.43193	2.17999	-3.40916	0.000651625	0.0222085	ENSBTAG00000054566
ENSBTAG00000040507	440.416	1.1109	0.325832	3.40944	0.000650961	0.0222085	ENSBTAG00000040507	Rho/Rac guanine nucleotide exchange factor 18 [Source:NCBI gene;Acc:522521]
ENSBTAG00000023744	3224.19	0.778356	0.228358	3.40848	0.000653253	0.0222121	YPEL5	yippee like 5 [Source:VGNC Symbol;Acc:VGNC:37037]
ENSBTAG00000016882	7315.45	0.637164	0.187067	3.40607	0.000659042	0.0223569	VPS26A	VPS26, retromer complex component A [Source:VGNC Symbol;Acc:VGNC:36814]
ENSBTAG00000003798	4007.44	-0.481041	0.141262	-3.4053	0.000660905	0.022368	AMFR	autocrine motility factor receptor [Source:VGNC Symbol;Acc:VGNC:25863]
ENSBTAG00000012262	25.1307	-5.62792	1.65379	-3.40305	0.000666382	0.0225012	FBXO10	F-box protein 10 [Source:VGNC Symbol;Acc:VGNC:53303]
ENSBTAG00000013393	1975.9	-1.10813	0.326014	-3.39904	0.000676235	0.0226764	GEMIN4	gem nuclear organelle associated protein 4 [Source:VGNC Symbol;Acc:VGNC:29317]
ENSBTAG00000020023	2013.03	-0.662597	0.194905	-3.39958	0.00067489	0.0226764	MTHFS	5,10-methenyltetrahydrofolate synthetase (5-formyltetrahydrofolate cyclo-ligase) [Source:NCBI gene;Acc:513372]
ENSBTAG00000018848	230.996	1.20844	0.355397	3.40026	0.000673224	0.0226764	FBXL3	F-box and leucine rich repeat protein 3 [Source:VGNC Symbol;Acc:VGNC:52777]
ENSBTAG00000007772	67.2778	-2.20299	0.648877	-3.39507	0.000686098	0.0229019	SLC29A4	solute carrier family 29 member 4 [Source:VGNC Symbol;Acc:VGNC:34795]
ENSBTAG00000015267	790.759	0.650677	0.191652	3.3951	0.00068603	0.0229019	SGSH	N-sulfoglucosamine sulfohydrolase [Source:VGNC Symbol;Acc:VGNC:34549]
ENSBTAG00000003679	2270.55	-0.580504	0.171077	-3.39322	0.000690753	0.0230046	PAAF1	proteasomal ATPase associated factor 1 [Source:VGNC Symbol;Acc:VGNC:54890]
ENSBTAG00000015254	10394.8	0.81169	0.239285	3.39215	0.000693463	0.0230422	GLB1	galactosidase beta 1 [Source:VGNC Symbol;Acc:VGNC:29391]
ENSBTAG00000015195	2881.85	0.952849	0.281055	3.39026	0.000698264	0.023149	NPC1	NPC intracellular cholesterol transporter 1 [Source:VGNC Symbol;Acc:VGNC:32194]
ENSBTAG00000004401	34.0363	-7.53052	2.22389	-3.38619	0.000708698	0.0233886	UGGT2	UDP-glucose glycoprotein glucosyltransferase 2 [Source:VGNC Symbol;Acc:VGNC:36650]
ENSBTAG00000006607	17101.4	0.744079	0.219711	3.38662	0.000707595	0.0233886	CCNG1	cyclin G1 [Source:VGNC Symbol;Acc:VGNC:26969]
ENSBTAG00000016561	1137.1	-0.972305	0.287452	-3.38249	0.000718321	0.0235518	NUBP2	nucleotide binding protein 2 [Source:VGNC Symbol;Acc:VGNC:32316]
ENSBTAG00000011473	8407.47	-0.734318	0.217132	-3.38189	0.000719885	0.0235518	MYL9	myosin light chain 9 [Source:VGNC Symbol;Acc:VGNC:57010]
ENSBTAG00000002108	63660.6	0.571584	0.169014	3.38187	0.000719947	0.0235518	YWHAQ	tyrosine 3-monooxygenase/tryptophan 5-monooxygenase activation protein theta [Source:VGNC Symbol;Acc:VGNC:37047]
ENSBTAG00000051208	8361.22	1.01067	0.298855	3.38181	0.000720101	0.0235518	ENSBTAG00000051208
ENSBTAG00000009366	15931.3	-0.81295	0.240601	-3.37883	0.000727937	0.0237549	ARF5	ADP ribosylation factor 5 [Source:VGNC Symbol;Acc:VGNC:26060]
ENSBTAG00000004286	1712.33	-0.552882	0.163713	-3.37714	0.000732429	0.0238481	CDC45	cell division cycle 45 [Source:VGNC Symbol;Acc:VGNC:27079]
ENSBTAG00000053396	11116.5	0.886514	0.262606	3.37583	0.000735925	0.0239086	ENSBTAG00000053396	endogenous retrovirus group PABLB member 1 Env polyprotein [Source:NCBI gene;Acc:104969408]
ENSBTAG00000011478	410.715	-0.835106	0.247593	-3.37289	0.000743825	0.024046	ELP6	elongator acetyltransferase complex subunit 6 [Source:VGNC Symbol;Acc:VGNC:28459]
ENSBTAG00000012063	2718.44	-0.559569	0.165925	-3.37242	0.000745101	0.024046	E2F4	E2F transcription factor 4 [Source:VGNC Symbol;Acc:VGNC:28288]
ENSBTAG00000013275	2638.97	0.740173	0.219438	3.37305	0.00074341	0.024046	MAD2L2	mitotic arrest deficient 2 like 2 [Source:VGNC Symbol;Acc:VGNC:31132]
ENSBTAG00000000727	85.5421	-2.36243	0.700717	-3.37145	0.000747731	0.0240776	RNF169	ring finger protein 169 [Source:VGNC Symbol;Acc:VGNC:34034]
ENSBTAG00000053003	7278.67	0.777603	0.230782	3.36943	0.000753242	0.0242016	GPX4	glutathione peroxidase 4 [Source:NCBI gene;Acc:286809]
ENSBTAG00000021896	1495.32	0.95685	0.284186	3.36698	0.000759949	0.0243635	NUP214	nucleoporin 214 [Source:VGNC Symbol;Acc:VGNC:32358]
ENSBTAG00000009798	840.946	-0.885518	0.263059	-3.36623	0.000762021	0.0243763	DCDC2	doublecortin domain containing 2 [Source:VGNC Symbol;Acc:VGNC:27910]
ENSBTAG00000019404	1125.51	0.724992	0.215589	3.36284	0.000771442	0.0246104	IL10RB	interleukin 10 receptor subunit beta [Source:VGNC Symbol;Acc:VGNC:56219]
ENSBTAG00000046160	893.736	0.981214	0.29182	3.36239	0.000772711	0.0246104	SMIM13	small integral membrane protein 13 [Source:VGNC Symbol;Acc:VGNC:35015]
ENSBTAG00000020894	4176.16	0.662132	0.197156	3.35842	0.000783906	0.0249125	LAPTM4A	lysosomal protein transmembrane 4 alpha [Source:VGNC Symbol;Acc:VGNC:30787]
ENSBTAG00000000671	10.3828	7.52517	2.24124	3.35759	0.000786238	0.0249323	PARP3	poly(ADP-ribose) polymerase family member 3 [Source:NCBI gene;Acc:507426]
ENSBTAG00000008761	3782.05	-0.745933	0.222391	-3.35416	0.000796065	0.0251346	TRAFD1	TRAF-type zinc finger domain containing 1 [Source:NCBI gene;Acc:512642]
ENSBTAG00000011876	1399.36	1.00777	0.300434	3.35439	0.000795406	0.0251346	MORC3	MORC family CW-type zinc finger 3 [Source:VGNC Symbol;Acc:VGNC:31556]
ENSBTAG00000026172	983.645	1.24807	0.372846	3.34742	0.000815682	0.0256984	LRATD2	LRAT domain containing 2 [Source:VGNC Symbol;Acc:VGNC:28841]
ENSBTAG00000026971	919.281	-0.758918	0.226789	-3.34635	0.000818818	0.0257416	CDCA5	cell division cycle associated 5 [Source:VGNC Symbol;Acc:VGNC:56261]
ENSBTAG00000018959	16146.8	0.520708	0.155712	3.34403	0.0008257	0.0258584	RAB11A	RAB11A, member RAS oncogene family [Source:VGNC Symbol;Acc:VGNC:33614]
ENSBTAG00000005909	1525.79	0.601476	0.179872	3.34391	0.000826078	0.0258584	LEPROT	leptin receptor overlapping transcript [Source:VGNC Symbol;Acc:VGNC:30844]
ENSBTAG00000008898	105.331	-1.47503	0.441329	-3.34225	0.000831012	0.0259309	GBX2	gastrulation brain homeobox 2 [Source:VGNC Symbol;Acc:VGNC:29276]
ENSBTAG00000046408	260.859	-1.30337	0.390003	-3.34194	0.000831952	0.0259309	FAM124A	family with sequence similarity 124 member A [Source:VGNC Symbol;Acc:VGNC:28723]
ENSBTAG00000021771	17593.4	0.699668	0.209425	3.34091	0.000835052	0.0259721	PTTG1IP	PTTG1 interacting protein [Source:VGNC Symbol;Acc:VGNC:33565]
ENSBTAG00000015595	22752	-0.78301	0.234424	-3.34014	0.000837354	0.0259883	MCM5	minichromosome maintenance complex component 5 [Source:VGNC Symbol;Acc:VGNC:31311]
ENSBTAG00000016208	1424.04	-1.33208	0.398971	-3.3388	0.000841413	0.0260114	TGM2	transglutaminase 2 [Source:VGNC Symbol;Acc:VGNC:35810]
ENSBTAG00000013277	1198.26	-0.850103	0.254888	-3.33521	0.000852364	0.0260114	CCDC22	coiled-coil domain containing 22 [Source:VGNC Symbol;Acc:VGNC:26886]
ENSBTAG00000011217	5194.75	-0.566319	0.169686	-3.33746	0.000845494	0.0260114	DNAJC11	DnaJ heat shock protein family (Hsp40) member C11 [Source:NCBI gene;Acc:508137]
ENSBTAG00000019883	10689.3	0.412316	0.123589	3.3362	0.00084932	0.0260114	IST1	IST1 factor associated with ESCRT-III [Source:VGNC Symbol;Acc:VGNC:30304]
ENSBTAG00000020642	1538.05	0.904781	0.271023	3.3384	0.000842635	0.0260114	ZDHHC13	zinc finger DHHC-type containing 13 [Source:VGNC Symbol;Acc:VGNC:37128]
ENSBTAG00000014883	2203.45	0.917343	0.274908	3.3369	0.000847174	0.0260114	GABARAP	GABA type A receptor-associated protein [Source:VGNC Symbol;Acc:VGNC:29185]
ENSBTAG00000045550	3653.69	1.09091	0.327079	3.33532	0.000852024	0.0260114	TSPAN6	tetraspanin 6 [Source:VGNC Symbol;Acc:VGNC:36441]
ENSBTAG00000021226	453.646	1.16561	0.349204	3.33789	0.000844166	0.0260114	SAR1B	secretion associated Ras related GTPase 1B [Source:VGNC Symbol;Acc:VGNC:34287]
ENSBTAG00000015655	617.466	-1.62809	0.488679	-3.33162	0.000863426	0.0262639	APBB1	amyloid beta precursor protein binding family B member 1 [Source:VGNC Symbol;Acc:VGNC:26003]
ENSBTAG00000015662	22.9135	8.70086	2.61181	3.33136	0.000864241	0.0262639	IMPG2	interphotoreceptor matrix proteoglycan 2 [Source:VGNC Symbol;Acc:VGNC:30190]
ENSBTAG00000015177	6038.47	1.80891	0.543346	3.32921	0.000870932	0.0264122	PRSS23	serine protease 23 [Source:VGNC Symbol;Acc:VGNC:33416]
ENSBTAG00000039591	3235.78	0.830113	0.249514	3.32691	0.000878134	0.0265754	TMEM167A	transmembrane protein 167A [Source:VGNC Symbol;Acc:VGNC:35991]
ENSBTAG00000001113	1070.54	-0.657085	0.197569	-3.32586	0.000881473	0.0266114	NDUFAF7	NADH:ubiquinone oxidoreductase complex assembly factor 7 [Source:VGNC Symbol;Acc:VGNC:31959]
ENSBTAG00000000748	3092.5	-0.635542	0.191217	-3.32366	0.000888444	0.0266114	GAR1	GAR1 ribonucleoprotein [Source:VGNC Symbol;Acc:VGNC:29251]
ENSBTAG00000014140	93168.5	0.521734	0.156915	3.32495	0.000884352	0.0266114	ATP1B3	ATPase Na+/K+ transporting subunit beta 3 [Source:VGNC Symbol;Acc:VGNC:26287]
ENSBTAG00000019043	2679.22	0.639359	0.192362	3.32372	0.000888244	0.0266114	GABPA	GA binding protein transcription factor subunit alpha [Source:VGNC Symbol;Acc:VGNC:29189]
ENSBTAG00000051802	8.1913	7.1919	2.16346	3.32426	0.000886543	0.0266114	ENSBTAG00000051802
ENSBTAG00000006671	4809.24	-0.806907	0.243112	-3.31907	0.000903173	0.0269971	DDX27	DEAD-box helicase 27 [Source:VGNC Symbol;Acc:VGNC:56183]
ENSBTAG00000018745	128.753	2.03265	0.612618	3.31797	0.000906755	0.0270487	CEP290	centrosomal protein 290 [Source:VGNC Symbol;Acc:VGNC:27201]
ENSBTAG00000001298	32.1028	-8.42327	2.54078	-3.31522	0.0009157	0.0272598	STAMBPL1	STAM binding protein like 1 [Source:VGNC Symbol;Acc:VGNC:35357]
ENSBTAG00000019871	2132.66	-0.91295	0.275604	-3.31254	0.000924525	0.0274665	TRMT2A	tRNA methyltransferase 2 homolog A [Source:VGNC Symbol;Acc:VGNC:36372]
ENSBTAG00000021904	12.0171	3.90512	1.17926	3.31151	0.000927933	0.0275117	KIF26A	kinesin family member 26A [Source:VGNC Symbol;Acc:VGNC:53944]
ENSBTAG00000013488	72.7005	1.6329	0.493304	3.31013	0.000932517	0.0275915	PPP1R14D	protein phosphatase 1 regulatory inhibitor subunit 14D [Source:VGNC Symbol;Acc:VGNC:55136]
ENSBTAG00000011257	1443.4	0.973174	0.294169	3.30822	0.000938919	0.0277247	ASAH1	N-acylsphingosine amidohydrolase 1 [Source:VGNC Symbol;Acc:VGNC:26183]
ENSBTAG00000013988	1032.62	-0.93611	0.283062	-3.30708	0.000942723	0.0277808	BID	BH3 interacting domain death agonist [Source:VGNC Symbol;Acc:VGNC:26496]
ENSBTAG00000006082	1489.94	0.889544	0.269243	3.30387	0.0009536	0.0279362	DNASE2	deoxyribonuclease 2, lysosomal [Source:VGNC Symbol;Acc:VGNC:28136]
ENSBTAG00000011785	1367.29	0.893318	0.270389	3.30383	0.000953743	0.0279362	WDR26	WD repeat domain 26 [Source:VGNC Symbol;Acc:VGNC:36889]
ENSBTAG00000010482	528.478	1.1907	0.360279	3.30492	0.000950026	0.0279362	PITPNM1	phosphatidylinositol transfer protein membrane associated 1 [Source:VGNC Symbol;Acc:VGNC:32921]
ENSBTAG00000001830	33.2739	-3.24569	0.982831	-3.30238	0.000958669	0.0280243	LRRC46	leucine rich repeat containing 46 [Source:VGNC Symbol;Acc:VGNC:52801]
ENSBTAG00000016159	87.6803	-1.87582	0.56829	-3.30081	0.000964065	0.0280719	NPBWR1	neuropeptides B and W receptor 1 [Source:VGNC Symbol;Acc:VGNC:32193]
ENSBTAG00000006971	1367.61	-0.826736	0.250466	-3.30078	0.000964148	0.0280719	BRD9	bromodomain containing 9 [Source:VGNC Symbol;Acc:VGNC:26561]
ENSBTAG00000023384	474.622	-1.09145	0.330871	-3.29873	0.000971229	0.0282218	CBR1	carbonyl reductase 1 [Source:NCBI gene;Acc:515946]
ENSBTAG00000051119	484.292	1.63999	0.498216	3.29173	0.000995725	0.028876	ENSBTAG00000051119
ENSBTAG00000010452	284.678	-1.56624	0.476466	-3.28719	0.00101191	0.0290792	PODXL	podocalyxin like [Source:VGNC Symbol;Acc:VGNC:53665]
ENSBTAG00000020873	12218.9	-0.92133	0.280239	-3.28766	0.00101024	0.0290792	MAT2A	methionine adenosyltransferase 2A [Source:VGNC Symbol;Acc:VGNC:50214]
ENSBTAG00000015280	3722.76	-0.558782	0.169999	-3.28697	0.0010127	0.0290792	KIF2C	kinesin family member 2C [Source:VGNC Symbol;Acc:VGNC:30601]
ENSBTAG00000022731	12437	0.385796	0.117292	3.28919	0.00100476	0.0290792	SSR1	signal sequence receptor subunit 1 [Source:VGNC Symbol;Acc:VGNC:35319]
ENSBTAG00000007022	6027.39	0.784598	0.238587	3.28851	0.00100718	0.0290792	ENSBTAG00000007022
ENSBTAG00000004184	754.553	0.87295	0.265771	3.2846	0.00102129	0.0292683	WDSUB1	WD repeat, sterile alpha motif and U-box domain containing 1 [Source:VGNC Symbol;Acc:VGNC:36928]
ENSBTAG00000014334	721.884	1.03656	0.315747	3.28288	0.00102752	0.029389	ZFYVE26	zinc finger FYVE-type containing 26 [Source:VGNC Symbol;Acc:VGNC:37176]
ENSBTAG00000003610	395.129	1.62511	0.495281	3.28118	0.00103373	0.0295089	DENND1A	DENN domain containing 1A [Source:VGNC Symbol;Acc:VGNC:27993]
ENSBTAG00000053484	533.137	-1.1545	0.352361	-3.27648	0.00105109	0.0299458	CTDP1	CTD phosphatase subunit 1 [Source:NCBI gene;Acc:100336537]
ENSBTAG00000021483	15.446	-7.75816	2.37002	-3.27346	0.00106239	0.0301652	OLFML1	olfactomedin like 1 [Source:VGNC Symbol;Acc:VGNC:32421]
ENSBTAG00000018688	2427.18	-1.34229	0.410169	-3.27253	0.00106591	0.0301652	CBR3	carbonyl reductase 3 [Source:VGNC Symbol;Acc:VGNC:53516]
ENSBTAG00000005166	2662.76	-0.73223	0.223772	-3.27222	0.00106706	0.0301652	CHTOP	chromatin target of PRMT1 [Source:VGNC Symbol;Acc:VGNC:27353]
ENSBTAG00000015721	1400.89	-0.666151	0.203512	-3.27328	0.00106307	0.0301652	RAVER1	ribonucleoprotein, PTB binding 1 [Source:VGNC Symbol;Acc:VGNC:55304]
ENSBTAG00000054392	1361.11	0.801909	0.245203	3.27039	0.001074	0.0302442	ENSBTAG00000054392
ENSBTAG00000005986	342.128	0.84463	0.258242	3.27069	0.00107284	0.0302442	SFT2D3	SFT2 domain containing 3 [Source:VGNC Symbol;Acc:VGNC:34526]
ENSBTAG00000007244	11293.4	-1.04938	0.321618	-3.2628	0.00110317	0.0308865	NID1	nidogen 1 [Source:VGNC Symbol;Acc:VGNC:55991]
ENSBTAG00000021948	1487.88	-0.685529	0.210096	-3.26292	0.00110269	0.0308865	ZMYM6	zinc finger MYM-type containing 6 [Source:VGNC Symbol;Acc:VGNC:59192]
ENSBTAG00000006795	3188.45	0.794931	0.243579	3.26355	0.00110027	0.0308865	GCSH	glycine cleavage system protein H [Source:NCBI gene;Acc:317723]
ENSBTAG00000053585	410.886	0.843449	0.258579	3.26186	0.00110683	0.0309298	ENSBTAG00000053585
ENSBTAG00000010313	3277.99	0.541432	0.166096	3.25975	0.00111511	0.0310497	DDX52	DExD-box helicase 52 [Source:VGNC Symbol;Acc:VGNC:27975]
ENSBTAG00000050912	296.27	1.25174	0.384008	3.25968	0.00111538	0.0310497	ENSBTAG00000050912
ENSBTAG00000016913	930.366	-1.32689	0.407511	-3.25609	0.00112959	0.0313703	AVIL	advillin [Source:VGNC Symbol;Acc:VGNC:26354]
ENSBTAG00000016708	13747.4	0.748677	0.22996	3.25568	0.0011312	0.0313703	CLTC	clathrin heavy chain [Source:VGNC Symbol;Acc:VGNC:27471]
ENSBTAG00000011826	175.486	-1.08361	0.332894	-3.25513	0.00113341	0.0313721	PEX26	peroxisomal biogenesis factor 26 [Source:VGNC Symbol;Acc:VGNC:32759]
ENSBTAG00000018105	931.847	-0.740862	0.227739	-3.25312	0.00114147	0.0314163	ACVR2B	activin A receptor type 2B [Source:VGNC Symbol;Acc:VGNC:25596]
ENSBTAG00000017258	20712.9	0.932665	0.286653	3.25363	0.00113939	0.0314163	ACSL3	acyl-CoA synthetase long chain family member 3 [Source:VGNC Symbol;Acc:VGNC:25565]
ENSBTAG00000007578	129.441	1.27722	0.392496	3.25409	0.00113754	0.0314163	SHTN1	shootin 1 [Source:VGNC Symbol;Acc:VGNC:34611]
ENSBTAG00000001752	493.832	1.12989	0.347461	3.25183	0.00114664	0.031499	FUCA2	alpha-L-fucosidase 2 [Source:VGNC Symbol;Acc:VGNC:29141]
ENSBTAG00000044058	750.082	1.01605	0.31269	3.24938	0.00115658	0.0316531	MFSD8	major facilitator superfamily domain containing 8 [Source:VGNC Symbol;Acc:VGNC:31443]
ENSBTAG00000016053	560.909	1.32052	0.406343	3.24978	0.00115496	0.0316531	ARSA	arylsulfatase A [Source:VGNC Symbol;Acc:VGNC:50217]
ENSBTAG00000011147	3895.52	0.846992	0.26128	3.2417	0.0011882	0.0324071	RNF13	ring finger protein 13 [Source:VGNC Symbol;Acc:VGNC:34020]
ENSBTAG00000049344	1497.7	1.0924	0.336992	3.24161	0.00118858	0.0324071	ENSBTAG00000049344
ENSBTAG00000017407	600.958	-1.09546	0.338046	-3.24057	0.0011929	0.0324641	HSF2BP	heat shock transcription factor 2 binding protein [Source:VGNC Symbol;Acc:VGNC:29983]
ENSBTAG00000049338	149.476	1.25054	0.386154	3.23844	0.00120185	0.0326468	ENSBTAG00000049338
ENSBTAG00000006429	11280.8	-0.810033	0.250198	-3.23758	0.0012055	0.0326852	ACO2	aconitase 2 [Source:VGNC Symbol;Acc:VGNC:25546]
ENSBTAG00000019079	32.6524	-4.32111	1.33512	-3.2365	0.00121007	0.0327198	PLCB2	phospholipase C beta 2 [Source:VGNC Symbol;Acc:VGNC:32981]
ENSBTAG00000020630	7169.72	0.489401	0.151226	3.23621	0.00121126	0.0327198	KCMF1	potassium channel modulatory factor 1 [Source:VGNC Symbol;Acc:VGNC:30419]
ENSBTAG00000023377	125.361	1.71304	0.529841	3.23312	0.00122445	0.0330149	SH3BP5	SH3 domain binding protein 5 [Source:VGNC Symbol;Acc:VGNC:34568]
ENSBTAG00000050785	201.767	-0.886997	0.274483	-3.23151	0.00123136	0.0330189	ENSBTAG00000050785
ENSBTAG00000008181	1816.26	-0.812376	0.251392	-3.23151	0.00123139	0.0330189	CHAF1A	chromatin assembly factor 1 subunit A [Source:VGNC Symbol;Acc:VGNC:27266]
ENSBTAG00000017161	349.341	0.851844	0.263594	3.23165	0.00123076	0.0330189	TM2D1	TM2 domain containing 1 [Source:VGNC Symbol;Acc:VGNC:35900]
ENSBTAG00000012246	260.269	1.9345	0.599021	3.22944	0.00124031	0.033197	ANO2	anoctamin 2 [Source:VGNC Symbol;Acc:VGNC:25951]
ENSBTAG00000012461	477.837	-0.883726	0.273977	-3.22555	0.00125732	0.0335908	PRSS16	serine protease 16 [Source:VGNC Symbol;Acc:VGNC:33414]
ENSBTAG00000014215	2309.04	-0.674489	0.209219	-3.22385	0.00126482	0.0337262	CCDC86	coiled-coil domain containing 86 [Source:NCBI gene;Acc:540913]
ENSBTAG00000005400	2378.68	0.858347	0.266291	3.22335	0.00126702	0.0337262	ATG5	autophagy related 5 [Source:VGNC Symbol;Acc:VGNC:56361]
ENSBTAG00000017775	347.074	-1.1539	0.358291	-3.22057	0.00127937	0.0339842	SDCCAG8	serologically defined colon cancer antigen 8 [Source:NCBI gene;Acc:616342]
ENSBTAG00000017631	2095	-0.838799	0.260574	-3.21904	0.00128622	0.0339842	GFER	growth factor, augmenter of liver regeneration [Source:VGNC Symbol;Acc:VGNC:29324]
ENSBTAG00000030769	2063.15	-0.784415	0.243671	-3.21916	0.00128568	0.0339842	KPTN	kaptin, actin binding protein [Source:VGNC Symbol;Acc:VGNC:30709]
ENSBTAG00000015434	29799.5	0.591449	0.183723	3.21924	0.00128529	0.0339842	DSTN	destrin, actin depolymerizing factor [Source:VGNC Symbol;Acc:VGNC:28226]
ENSBTAG00000021855	112.554	1.36827	0.42512	3.21856	0.00128836	0.0339842	ANO3	anoctamin 3 [Source:VGNC Symbol;Acc:VGNC:25952]
ENSBTAG00000021977	1168.17	0.636236	0.197724	3.2178	0.00129178	0.0340131	PRRC1	proline rich coiled-coil 1 [Source:VGNC Symbol;Acc:VGNC:33403]
ENSBTAG00000018889	18280.9	0.516766	0.160657	3.21658	0.00129727	0.0340961	ATP6V0B	ATPase H+ transporting V0 subunit b [Source:VGNC Symbol;Acc:VGNC:26310]
ENSBTAG00000044146	31.0499	-5.30851	1.65161	-3.21413	0.00130838	0.0343262	NPC1L1	NPC1 like intracellular cholesterol transporter 1 [Source:VGNC Symbol;Acc:VGNC:32195]
ENSBTAG00000039994	30.7989	-2.93895	0.915668	-3.20962	0.00132911	0.034621	ENSBTAG00000005950
ENSBTAG00000014001	527.753	-1.59533	0.496956	-3.21021	0.00132638	0.034621	MAP1A	microtubule associated protein 1A [Source:VGNC Symbol;Acc:VGNC:31177]
ENSBTAG00000023279	1786.16	0.55016	0.171399	3.20981	0.00132822	0.034621	N4BP2L2	NEDD4 binding protein 2 like 2 [Source:VGNC Symbol;Acc:VGNC:53827]
ENSBTAG00000004555	9233.55	1.69423	0.527852	3.20967	0.00132886	0.034621	LRP2	LDL receptor related protein 2 [Source:VGNC Symbol;Acc:VGNC:30990]
ENSBTAG00000004494	436.193	-2.56972	0.801539	-3.20598	0.00134602	0.0349989	B4GALNT1	beta-1,4-N-acetyl-galactosaminyltransferase 1 [Source:VGNC Symbol;Acc:VGNC:26385]
ENSBTAG00000004953	71.7359	1.49199	0.465598	3.20445	0.0013532	0.0351229	ELK4	ETS transcription factor ELK4 [Source:VGNC Symbol;Acc:VGNC:28434]
ENSBTAG00000015073	744.929	1.21362	0.379162	3.2008	0.00137048	0.0355084	CRPPA	CDP-L-ribitol pyrophosphorylase A [Source:VGNC Symbol;Acc:VGNC:30303]
ENSBTAG00000007635	26.6398	-7.22958	2.26057	-3.19812	0.00138326	0.0357759	PLCL1	phospholipase C like 1 (inactive) [Source:VGNC Symbol;Acc:VGNC:56161]
ENSBTAG00000005115	945.468	0.753158	0.235552	3.19742	0.00138662	0.0357994	SLC31A2	solute carrier family 31 member 2 [Source:VGNC Symbol;Acc:VGNC:34814]
ENSBTAG00000053909	584.364	-0.860483	0.269346	-3.19471	0.0013997	0.0360731	NAT9	N-acetyltransferase 9 (putative) [Source:NCBI gene;Acc:514377]
ENSBTAG00000023918	18.5825	7.61615	2.38552	3.19267	0.00140966	0.0362659	ENSBTAG00000023918
ENSBTAG00000016152	5369.96	1.48414	0.465031	3.19148	0.00141545	0.0363506	DAB2	DAB adaptor protein 2 [Source:VGNC Symbol;Acc:VGNC:27865]
ENSBTAG00000021829	24111.5	1.17545	0.368608	3.18889	0.00142819	0.0366133	GM2A	GM2 ganglioside activator [Source:VGNC Symbol;Acc:VGNC:29431]
ENSBTAG00000004595	17.7412	4.3372	1.36046	3.18805	0.00143238	0.0366563	GML	glycosylphosphatidylinositol anchored molecule like [Source:VGNC Symbol;Acc:VGNC:29437]
ENSBTAG00000023947	534.533	-0.809692	0.254057	-3.18704	0.00143736	0.0367193	AVPI1	arginine vasopressin induced 1 [Source:VGNC Symbol;Acc:VGNC:26357]
ENSBTAG00000005631	5529.88	-0.820793	0.257635	-3.18588	0.00144316	0.036803	VARS1	valyl-tRNA synthetase 1 [Source:VGNC Symbol;Acc:VGNC:36765]
ENSBTAG00000006084	5013.56	-0.754068	0.2368	-3.18441	0.00145051	0.0369042	PINK1	PTEN induced kinase 1 [Source:VGNC Symbol;Acc:VGNC:32904]
ENSBTAG00000003866	1154.86	-0.641168	0.201367	-3.18407	0.00145218	0.0369042	PPP1R8	protein phosphatase 1 regulatory subunit 8 [Source:VGNC Symbol;Acc:VGNC:33249]
ENSBTAG00000013562	1425.91	-0.977983	0.307453	-3.18092	0.00146811	0.0372439	SKP2	S-phase kinase associated protein 2 [Source:NCBI gene;Acc:519018]
ENSBTAG00000017680	393.28	1.54311	0.485233	3.18014	0.00147206	0.0372794	NOS3	nitric oxide synthase 3 [Source:VGNC Symbol;Acc:VGNC:32174]
ENSBTAG00000002704	1651.09	-0.860446	0.270871	-3.17659	0.00149018	0.0375427	POMT2	protein O-mannosyltransferase 2 [Source:VGNC Symbol;Acc:VGNC:33159]
ENSBTAG00000000429	1787.11	-0.815964	0.256838	-3.17696	0.00148826	0.0375427	DGCR2	DiGeorge syndrome critical region gene 2 [Source:NCBI gene;Acc:767971]
ENSBTAG00000009578	1978.03	-0.768935	0.24206	-3.17663	0.00148997	0.0375427	PTK2	protein tyrosine kinase 2 [Source:VGNC Symbol;Acc:VGNC:33518]
ENSBTAG00000052991	292.125	0.900072	0.283413	3.17584	0.00149406	0.0375756	ENSBTAG00000052991
ENSBTAG00000026275	1668.98	-1.09554	0.345157	-3.17403	0.0015034	0.0377454	CCL24	C-C motif chemokine ligand 24 [Source:VGNC Symbol;Acc:VGNC:26950]
ENSBTAG00000002896	146.913	1.35939	0.428443	3.17286	0.00150944	0.037832	KPNA6	karyopherin subunit alpha 6 [Source:VGNC Symbol;Acc:VGNC:30705]
ENSBTAG00000002378	6373.68	-0.730081	0.230142	-3.17231	0.00151232	0.0378391	NUCB1	nucleobindin 1 [Source:VGNC Symbol;Acc:VGNC:32318]
ENSBTAG00000018446	3265.52	1.52028	0.479429	3.17102	0.00151903	0.0378771	GCA	grancalcin [Source:VGNC Symbol;Acc:VGNC:29278]
ENSBTAG00000000576	276.735	1.93294	0.609472	3.17149	0.00151658	0.0378771	ADGRG2	adhesion G protein-coupled receptor G2 [Source:VGNC Symbol;Acc:VGNC:25666]
ENSBTAG00000008833	317.335	-1.15099	0.3631	-3.1699	0.00152492	0.0379591	APOM	apolipoprotein M [Source:VGNC Symbol;Acc:VGNC:26034]
ENSBTAG00000006511	489.197	0.915597	0.288916	3.16908	0.00152924	0.0380018	MTF1	metal regulatory transcription factor 1 [Source:VGNC Symbol;Acc:VGNC:31722]
ENSBTAG00000008951	702.809	-1.66149	0.524464	-3.16798	0.00153503	0.0380161	ALPL	alkaline phosphatase, biomineralization associated [Source:VGNC Symbol;Acc:VGNC:25850]
ENSBTAG00000009076	323.01	-1.40873	0.444637	-3.16828	0.00153342	0.0380161	ADD2	adducin 2 [Source:VGNC Symbol;Acc:VGNC:25654]
ENSBTAG00000001754	8601.84	-0.773989	0.244402	-3.16687	0.00154087	0.038096	AHCYL2	adenosylhomocysteinase like 2 [Source:VGNC Symbol;Acc:VGNC:25752]
ENSBTAG00000007430	4533.56	-1.16598	0.368282	-3.16601	0.00154545	0.0381446	MYBBP1A	MYB binding protein 1a [Source:VGNC Symbol;Acc:VGNC:31777]
ENSBTAG00000025452	934.578	-0.858612	0.271506	-3.1624	0.00156472	0.0385551	SF3A2	splicing factor 3a subunit 2 [Source:VGNC Symbol;Acc:VGNC:34507]
ENSBTAG00000050737	74.7315	2.1946	0.69497	3.15784	0.00158943	0.0390979	ENSBTAG00000050737
ENSBTAG00000053044	643.542	-1.04936	0.332581	-3.15521	0.00160381	0.0393297	CDC42EP4	CDC42 effector protein 4 [Source:NCBI gene;Acc:540152]
ENSBTAG00000020262	2141.76	1.15185	0.365071	3.15513	0.00160425	0.0393297	PSME4	proteasome activator subunit 4 [Source:VGNC Symbol;Acc:VGNC:33476]
ENSBTAG00000018227	1246.48	-0.836474	0.265254	-3.15349	0.00161332	0.0394857	SLC4A7	solute carrier family 4 member 7 [Source:VGNC Symbol;Acc:VGNC:34896]
ENSBTAG00000006715	2114.85	0.732735	0.232416	3.1527	0.0016177	0.0395267	FBXO8	F-box protein 8 [Source:VGNC Symbol;Acc:VGNC:28920]
ENSBTAG00000016206	33.2676	-5.29224	1.67993	-3.15027	0.0016312	0.0397899	MAOA	monoamine oxidase A [Source:VGNC Symbol;Acc:VGNC:31174]
ENSBTAG00000014606	315.381	-0.934047	0.296607	-3.1491	0.00163772	0.0398821	FOXR1	forkhead box R1 [Source:VGNC Symbol;Acc:VGNC:29104]
ENSBTAG00000020898	1609.4	-0.733974	0.233191	-3.14752	0.00164663	0.0400322	CHST12	carbohydrate sulfotransferase 12 [Source:VGNC Symbol;Acc:VGNC:27340]
ENSBTAG00000016558	1438.75	-0.804109	0.255554	-3.14653	0.00165218	0.0401003	SPSB3	splA/ryanodine receptor domain and SOCS box containing 3 [Source:VGNC Symbol;Acc:VGNC:35248]
ENSBTAG00000000356	1066.6	-0.755465	0.240178	-3.14543	0.00165841	0.0401848	CCDC137	coiled-coil domain containing 137 [Source:VGNC Symbol;Acc:VGNC:26849]
ENSBTAG00000014102	6708.15	-0.542027	0.172456	-3.14299	0.00167234	0.040455	WDR77	WD repeat domain 77 [Source:VGNC Symbol;Acc:VGNC:36921]
ENSBTAG00000010204	4397.56	0.423834	0.134919	3.14141	0.00168138	0.0406064	PCMT1	protein-L-isoaspartate (D-aspartate) O-methyltransferase [Source:VGNC Symbol;Acc:VGNC:53799]
ENSBTAG00000004869	1693.16	0.666721	0.212371	3.13942	0.00169282	0.0408153	CXADR	CXADR Ig-like cell adhesion molecule [Source:VGNC Symbol;Acc:VGNC:53521]
ENSBTAG00000015924	726.108	1.65378	0.526904	3.13868	0.00169713	0.0408517	CALB1	calbindin 1 [Source:VGNC Symbol;Acc:VGNC:26700]
ENSBTAG00000010131	1657.66	-0.729343	0.232433	-3.13787	0.00170183	0.0408971	ENSBTAG00000018474	CBFA2/RUNX1 partner transcriptional co-repressor 2 [Source:NCBI gene;Acc:527740]
ENSBTAG00000001895	1119.68	0.795965	0.253712	3.13729	0.0017052	0.0409108	PGGT1B	protein geranylgeranyltransferase type I subunit beta [Source:VGNC Symbol;Acc:VGNC:32788]
ENSBTAG00000045817	874.014	-1.0252	0.326878	-3.13634	0.00171072	0.0409758	BAP1	BRCA1 associated protein 1 [Source:VGNC Symbol;Acc:VGNC:26419]
ENSBTAG00000009770	639.193	1.52124	0.485478	3.13349	0.00172739	0.0413072	GPD2	glycerol-3-phosphate dehydrogenase 2 [Source:VGNC Symbol;Acc:VGNC:29531]
ENSBTAG00000009462	33672.2	-0.592218	0.189031	-3.13291	0.0017308	0.041321	MDH2	malate dehydrogenase 2 [Source:NCBI gene;Acc:281306]
ENSBTAG00000012235	225.678	-1.4115	0.45076	-3.13138	0.00173984	0.0414691	SHARPIN	SHANK associated RH domain interactor [Source:VGNC Symbol;Acc:VGNC:34587]
ENSBTAG00000014322	1636.54	0.958024	0.306005	3.13075	0.00174361	0.041491	FAM234B	family with sequence similarity 234 member B [Source:VGNC Symbol;Acc:VGNC:28805]
ENSBTAG00000017038	498.833	-0.999754	0.319488	-3.12924	0.00175259	0.0416368	HPS4	HPS4 biogenesis of lysosomal organelles complex 3 subunit 2 [Source:VGNC Symbol;Acc:VGNC:29945]
ENSBTAG00000012005	597.196	-0.896548	0.286862	-3.12537	0.00177584	0.0421205	IFT43	intraflagellar transport 43 [Source:VGNC Symbol;Acc:VGNC:30068]
ENSBTAG00000006589	66.119	-4.26905	1.36667	-3.12368	0.00178605	0.0422053	CFTR	CF transmembrane conductance regulator [Source:VGNC Symbol;Acc:VGNC:50053]
ENSBTAG00000010242	7806.37	0.601143	0.192468	3.12334	0.00178809	0.0422053	LAMP1	lysosomal associated membrane protein 1 [Source:VGNC Symbol;Acc:VGNC:30775]
ENSBTAG00000040151	1375.54	0.626208	0.200438	3.12421	0.00178286	0.0422053	GCH1	GTP cyclohydrolase 1 [Source:VGNC Symbol;Acc:VGNC:29286]
ENSBTAG00000020414	887.26	-1.09056	0.349381	-3.1214	0.00179996	0.0424124	DHX37	DEAH-box helicase 37 [Source:VGNC Symbol;Acc:VGNC:28055]
ENSBTAG00000047582	321.292	-1.06584	0.341511	-3.12095	0.00180268	0.0424124	CSNK1E	casein kinase 1, epsilon [Source:NCBI gene;Acc:768234]
ENSBTAG00000013493	280.463	-0.928057	0.297497	-3.11955	0.00181129	0.0424463	BNIP2	BCL2 interacting protein 2 [Source:VGNC Symbol;Acc:VGNC:26532]
ENSBTAG00000001698	1156.43	-0.919577	0.294827	-3.11904	0.00181439	0.0424463	CHTF8	chromosome transmission fidelity factor 8 [Source:NCBI gene;Acc:618186]
ENSBTAG00000035175	851.585	-0.690799	0.22141	-3.12001	0.00180846	0.0424463	DONSON	downstream neighbor of SON [Source:VGNC Symbol;Acc:VGNC:56216]
ENSBTAG00000036102	3443.73	1.45836	0.4676	3.11882	0.00181576	0.0424463	ENSBTAG00000036102
ENSBTAG00000001225	3640.77	-0.825612	0.264764	-3.1183	0.00181897	0.0424534	RBM14	RNA binding motif protein 14 [Source:VGNC Symbol;Acc:VGNC:56277]
ENSBTAG00000018954	3929.21	-0.575291	0.184622	-3.11605	0.00183292	0.0427105	ELP2	elongator acetyltransferase complex subunit 2 [Source:VGNC Symbol;Acc:VGNC:28455]
ENSBTAG00000014093	4241.04	-1.05055	0.337343	-3.11421	0.0018444	0.0427391	IDH2	isocitrate dehydrogenase (NADP(+)) 2 [Source:VGNC Symbol;Acc:VGNC:53941]
ENSBTAG00000016735	892.352	-0.908235	0.291664	-3.11397	0.00184586	0.0427391	ZBTB48	zinc finger and BTB domain containing 48 [Source:VGNC Symbol;Acc:VGNC:37085]
ENSBTAG00000048690	431.761	0.749492	0.240617	3.11487	0.00184024	0.0427391	ENSBTAG00000048690
ENSBTAG00000012595	854.177	0.87584	0.281199	3.11466	0.00184157	0.0427391	RIDA	reactive intermediate imine deaminase A homolog [Source:VGNC Symbol;Acc:VGNC:33964]
ENSBTAG00000053443	566.133	1.35614	0.435891	3.11119	0.00186334	0.0430754	RUM1	syncytin-Rum1 [Source:NCBI gene;Acc:104973909]
ENSBTAG00000006161	1107.05	1.26442	0.406837	3.10792	0.00188412	0.0434868	MET	MET proto-oncogene, receptor tyrosine kinase [Source:VGNC Symbol;Acc:VGNC:31394]
ENSBTAG00000001242	13.7804	-6.29112	2.02684	-3.10391	0.0019098	0.0439002	ADRB1	adrenoceptor beta 1 [Source:VGNC Symbol;Acc:VGNC:50130]
ENSBTAG00000002707	1491.71	-0.868537	0.279787	-3.10428	0.00190745	0.0439002	IPO4	importin 4 [Source:VGNC Symbol;Acc:VGNC:30242]
ENSBTAG00000019910	8113.64	0.504562	0.162567	3.10372	0.00191106	0.0439002	SDCBP	syndecan binding protein [Source:VGNC Symbol;Acc:VGNC:34382]
ENSBTAG00000053721	4473.16	0.935935	0.301643	3.10279	0.00191706	0.0439689	RHOV	ras homolog family member V [Source:NCBI gene;Acc:538143]
ENSBTAG00000010472	27.0384	-7.82493	2.523	-3.10144	0.00192585	0.044101	TNFAIP8L3	TNF alpha induced protein 8 like 3 [Source:VGNC Symbol;Acc:VGNC:36160]
ENSBTAG00000018588	40668.2	0.450242	0.145215	3.10053	0.00193173	0.0441663	TMBIM6	transmembrane BAX inhibitor motif containing 6 [Source:VGNC Symbol;Acc:VGNC:35916]
ENSBTAG00000051661	584.313	1.83508	0.592004	3.09978	0.00193667	0.04421	ENSBTAG00000051661
ENSBTAG00000043563	47640.5	0.598407	0.193134	3.0984	0.00194571	0.0442779	ND5	NADH dehydrogenase subunit 5 [Source:NCBI gene;Acc:3283887]
ENSBTAG00000012794	16.3158	7.63278	2.46314	3.0988	0.00194304	0.0442779	PAH	phenylalanine hydroxylase [Source:VGNC Symbol;Acc:VGNC:32554]
ENSBTAG00000004009	6607.68	-0.895943	0.289474	-3.09508	0.00196761	0.0445295	PMM1	phosphomannomutase 1 [Source:VGNC Symbol;Acc:VGNC:33072]
ENSBTAG00000005980	215.443	1.22981	0.397369	3.09487	0.00196898	0.0445295	RREB1	ras responsive element binding protein 1 [Source:VGNC Symbol;Acc:VGNC:34162]
ENSBTAG00000009984	1373.42	1.27212	0.410965	3.09544	0.00196523	0.0445295	SGPL1	sphingosine-1-phosphate lyase 1 [Source:VGNC Symbol;Acc:VGNC:34547]
ENSBTAG00000019958	46.7416	1.72166	0.556226	3.09525	0.00196649	0.0445295	NXNL2	nucleoredoxin like 2 [Source:VGNC Symbol;Acc:VGNC:32378]
ENSBTAG00000009461	60.3521	-2.13195	0.688973	-3.09438	0.00197221	0.0445336	STYXL1	serine/threonine/tyrosine interacting like 1 [Source:VGNC Symbol;Acc:VGNC:35453]
ENSBTAG00000033515	225.733	-2.14492	0.693621	-3.09235	0.00198581	0.0446602	ENSBTAG00000033515
ENSBTAG00000007335	1560.65	0.888075	0.287201	3.09217	0.00198701	0.0446602	TPD52	tumor protein D52 [Source:NCBI gene;Acc:540235]
ENSBTAG00000002326	109588	1.69176	0.547084	3.09231	0.00198604	0.0446602	LGALS3	galectin 3 [Source:VGNC Symbol;Acc:VGNC:30852]
ENSBTAG00000009686	702.549	-1.04134	0.337229	-3.08795	0.00201544	0.0452295	FBXO15	F-box protein 15 [Source:VGNC Symbol;Acc:VGNC:28893]
ENSBTAG00000005808	4153.53	0.510271	0.165284	3.08724	0.00202024	0.0452676	TMEM14C	transmembrane protein 14C [Source:NCBI gene;Acc:613802]
ENSBTAG00000050846	1756.68	-1.81687	0.588904	-3.08518	0.00203431	0.045513	ENSBTAG00000050846	interleukin 32 [Source:NCBI gene;Acc:505800]
ENSBTAG00000009506	24638	0.860247	0.278902	3.0844	0.0020396	0.0455615	NAGA	alpha-N-acetylgalactosaminidase [Source:VGNC Symbol;Acc:VGNC:31867]
ENSBTAG00000017890	382.844	-1.19191	0.386797	-3.08149	0.00205967	0.0459395	ZMAT5	zinc finger matrin-type 5 [Source:VGNC Symbol;Acc:VGNC:37194]
ENSBTAG00000011256	5754.43	0.764221	0.248165	3.07948	0.00207359	0.0461371	MYO1B	myosin IB [Source:VGNC Symbol;Acc:VGNC:31817]
ENSBTAG00000016320	1169.92	1.40463	0.456152	3.0793	0.00207486	0.0461371	LMO1	LIM domain only 1 [Source:VGNC Symbol;Acc:VGNC:30933]
ENSBTAG00000014269	2734.51	-0.898193	0.291942	-3.07662	0.00209363	0.0463792	SCARB1	scavenger receptor class B member 1 [Source:VGNC Symbol;Acc:VGNC:34324]
ENSBTAG00000008719	3280.74	-0.704281	0.228888	-3.07697	0.00209116	0.0463792	PRKCD	protein kinase C delta [Source:VGNC Symbol;Acc:VGNC:33329]
ENSBTAG00000003225	9635.03	-0.543281	0.176597	-3.07638	0.00209528	0.0463792	IMP4	IMP U3 small nucleolar ribonucleoprotein 4 [Source:VGNC Symbol;Acc:VGNC:30183]
ENSBTAG00000012705	17078.9	0.660069	0.214595	3.07589	0.00209876	0.0463859	DEGS1	delta 4-desaturase, sphingolipid 1 [Source:VGNC Symbol;Acc:VGNC:27990]
ENSBTAG00000008068	1930.02	0.481448	0.156563	3.07511	0.00210424	0.0464364	ERLEC1	endoplasmic reticulum lectin 1 [Source:VGNC Symbol;Acc:VGNC:28587]
ENSBTAG00000002939	219.834	1.29807	0.422244	3.07422	0.00211056	0.0465056	FURIN	furin, paired basic amino acid cleaving enzyme [Source:VGNC Symbol;Acc:VGNC:29146]
ENSBTAG00000010083	4030.33	-0.506644	0.164908	-3.07228	0.00212429	0.046641	HADHB	hydroxyacyl-CoA dehydrogenase trifunctional multienzyme complex subunit beta [Source:VGNC Symbol;Acc:VGNC:49554]
ENSBTAG00000002935	2101.29	0.651366	0.212033	3.072	0.00212629	0.046641	TMEM248	transmembrane protein 248 [Source:VGNC Symbol;Acc:VGNC:36057]
ENSBTAG00000016896	1361.27	0.889862	0.289597	3.07276	0.00212087	0.046641	HERPUD1	homocysteine inducible ER protein with ubiquitin like domain 1 [Source:VGNC Symbol;Acc:VGNC:29816]
ENSBTAG00000011892	802.22	-0.909163	0.296159	-3.06985	0.00214167	0.0469076	SRGAP1	SLIT-ROBO Rho GTPase activating protein 1 [Source:VGNC Symbol;Acc:VGNC:35278]
ENSBTAG00000001506	767.133	-0.859655	0.280085	-3.06926	0.0021459	0.0469299	HTT	huntingtin [Source:VGNC Symbol;Acc:VGNC:30007]
ENSBTAG00000014100	59.0608	2.72279	0.889096	3.06243	0.00219547	0.0479421	BAIAP3	BAI1 associated protein 3 [Source:VGNC Symbol;Acc:VGNC:26415]
ENSBTAG00000007964	2378.73	-0.926345	0.302546	-3.06183	0.00219987	0.0479664	ARPC4	actin related protein 2/3 complex subunit 4 [Source:NCBI gene;Acc:539459]
ENSBTAG00000001626	3225.62	-0.827386	0.270477	-3.05899	0.00222087	0.0480721	CTPS1	CTP synthase 1 [Source:VGNC Symbol;Acc:VGNC:27808]
ENSBTAG00000011753	1865.52	-0.618203	0.202022	-3.06008	0.00221275	0.0480721	RCC1L	RCC1 like [Source:VGNC Symbol;Acc:VGNC:33826]
ENSBTAG00000014874	368.855	0.823326	0.269119	3.05934	0.00221829	0.0480721	FYTTD1	forty-two-three domain containing 1 [Source:VGNC Symbol;Acc:VGNC:29164]
ENSBTAG00000000277	527.94	1.05479	0.34482	3.05894	0.00222119	0.0480721	IL18	interleukin 18 [Source:VGNC Symbol;Acc:VGNC:30126]
ENSBTAG00000018772	116.362	1.15707	0.378184	3.05954	0.00221678	0.0480721	TAF1C	TATA-box binding protein associated factor, RNA polymerase I subunit C [Source:VGNC Symbol;Acc:VGNC:35571]
ENSBTAG00000005950	16.6666	-3.1639	1.03566	-3.05497	0.00225086	0.0481052	GPR50	G protein-coupled receptor 50 [Source:VGNC Symbol;Acc:VGNC:29589]
ENSBTAG00000003762	117.212	-1.32998	0.435179	-3.05616	0.00224192	0.0481052	GNB5	G protein subunit beta 5 [Source:VGNC Symbol;Acc:VGNC:29462]
ENSBTAG00000014693	1076.86	-0.85181	0.278688	-3.0565	0.0022394	0.0481052	TMEM88	transmembrane protein 88 [Source:VGNC Symbol;Acc:VGNC:36120]
ENSBTAG00000007783	5553.28	-0.786663	0.257455	-3.05554	0.00224659	0.0481052	MYBL2	MYB proto-oncogene like 2 [Source:VGNC Symbol;Acc:VGNC:31779]
ENSBTAG00000017656	451.561	-0.699731	0.228954	-3.05621	0.00224157	0.0481052	ST3GAL3	ST3 beta-galactoside alpha-2,3-sialyltransferase 3 [Source:VGNC Symbol;Acc:VGNC:54493]
ENSBTAG00000011699	3804.97	-0.64316	0.210452	-3.05609	0.00224242	0.0481052	CDC37	cell division cycle 37 [Source:NCBI gene;Acc:520883]
ENSBTAG00000008150	2474.79	0.948994	0.31054	3.05595	0.0022435	0.0481052	PKIA	cAMP-dependent protein kinase inhibitor alpha [Source:VGNC Symbol;Acc:VGNC:32940]
ENSBTAG00000009384	3860.59	1.04807	0.343092	3.05479	0.00225217	0.0481052	AGTRAP	angiotensin II receptor associated protein [Source:VGNC Symbol;Acc:VGNC:25747]
ENSBTAG00000054826	146.931	1.54811	0.506786	3.05476	0.0022524	0.0481052	ENSBTAG00000054826
ENSBTAG00000018204	509.578	-2.03302	0.666426	-3.05062	0.00228367	0.0487015	MYH1	myosin heavy chain 1 [Source:VGNC Symbol;Acc:VGNC:55851]
ENSBTAG00000007837	2270.93	0.720454	0.236288	3.04905	0.00229566	0.0488858	SELENOI	selenoprotein I [Source:NCBI gene;Acc:506381]
ENSBTAG00000007306	56.4081	2.61908	0.859178	3.04836	0.00230096	0.0489273	RAB3C	RAB3C, member RAS oncogene family [Source:VGNC Symbol;Acc:VGNC:33651]
ENSBTAG00000000676	431.64	-1.40342	0.460583	-3.04706	0.00231094	0.0490302	DOP1A	DOP1 leucine zipper like protein A [Source:VGNC Symbol;Acc:VGNC:28172]
ENSBTAG00000017418	5127.34	-0.616879	0.202485	-3.04654	0.00231491	0.0490302	RRP1B	ribosomal RNA processing 1B [Source:VGNC Symbol;Acc:VGNC:34170]
ENSBTAG00000019093	24.2425	5.63654	1.85022	3.04641	0.00231589	0.0490302	AMY2B	amylase, alpha 2B (pancreatic) [Source:NCBI gene;Acc:505049]
ENSBTAG00000020073	118.207	2.30475	0.757124	3.04409	0.00233388	0.0493395	NCEH1	neutral cholesterol ester hydrolase 1 [Source:VGNC Symbol;Acc:VGNC:31911]
ENSBTAG00000001992	3081.03	1.07551	0.353381	3.04349	0.00233849	0.0493655	CYP51A1	cytochrome P450, family 51, subfamily A, polypeptide 1 [Source:NCBI gene;Acc:505060]
ENSBTAG00000010106	3422.23	-1.1216	0.368855	-3.04075	0.00235989	0.0495305	CCND3	cyclin D3 [Source:VGNC Symbol;Acc:VGNC:26964]
ENSBTAG00000002148	295.422	-1.05483	0.346773	-3.04185	0.00235129	0.0495305	RAB3D	RAB3D, member RAS oncogene family [Source:VGNC Symbol;Acc:VGNC:33652]
ENSBTAG00000004777	447.429	-0.925852	0.30445	-3.04106	0.00235748	0.0495305	S100B	S100 calcium binding protein B [Source:VGNC Symbol;Acc:VGNC:34248]
ENSBTAG00000020367	1494.04	-0.725811	0.23864	-3.04145	0.00235442	0.0495305	SLC30A9	solute carrier family 30 member 9 [Source:VGNC Symbol;Acc:VGNC:34812]
ENSBTAG00000011007	5087.7	-0.578537	0.190359	-3.03918	0.0023722	0.0497173	TTYH2	tweety family member 2 [Source:VGNC Symbol;Acc:VGNC:36501]
ENSBTAG00000011182	32370.2	-0.501545	0.165158	-3.03675	0.00239144	0.0499771	PDLIM1	PDZ and LIM domain 1 [Source:VGNC Symbol;Acc:VGNC:32707]
ENSBTAG00000011310	8.87652	6.49801	2.13966	3.03693	0.00238999	0.0499771	FAM155B	family with sequence similarity 155 member B [Source:VGNC Symbol;Acc:VGNC:28736]

## Sheet: SC vs SF+PGE2 padj<0.05
GenestableID	baseMean	log2FoldChange	lfcSE	stat	pvalue	padj	Gene name	Gene description
ENSBTAG00000000146	3112.85	-1.23581	0.168245	-7.34528	2.05322e-13	3.05868e-09	FARP1	FERM, ARH/RhoGEF and pleckstrin domain protein 1 [Source:VGNC Symbol;Acc:VGNC:28865]
ENSBTAG00000019340	26.0605	-21.6582	3.08039	-7.031	2.05061e-12	1.01826e-08	ENSBTAG00000019340
ENSBTAG00000023831	710.017	1.4752	0.208912	7.06135	1.64894e-12	1.01826e-08	ELP4	elongator acetyltransferase complex subunit 4 [Source:VGNC Symbol;Acc:VGNC:28457]
ENSBTAG00000013287	151.176	-2.62729	0.403616	-6.50939	7.54573e-11	2.81022e-07	SMO	smoothened, frizzled class receptor [Source:VGNC Symbol;Acc:VGNC:35025]
ENSBTAG00000002078	2498.19	-1.50404	0.24826	-6.0583	1.37564e-09	4.0986e-06	KDM4A	lysine demethylase 4A [Source:VGNC Symbol;Acc:VGNC:30527]
ENSBTAG00000016688	64.5358	-23.0319	3.84032	-5.99738	2.00523e-09	4.97865e-06	ENSBTAG00000016688
ENSBTAG00000003212	281.172	-3.3529	0.561651	-5.96972	2.37664e-09	5.05782e-06	NNAT	neuronatin [Source:VGNC Symbol;Acc:VGNC:32142]
ENSBTAG00000010531	220.843	-6.32583	1.06358	-5.94766	2.71997e-09	5.06493e-06	CYP1B1	cytochrome P450, family 1, subfamily B, polypeptide 1 [Source:NCBI gene;Acc:511470]
ENSBTAG00000038981	27.4018	-22.1821	3.84096	-5.77513	7.68926e-09	1.04134e-05	ENSBTAG00000038981	adhesion G protein-coupled receptor E4 [Source:NCBI gene;Acc:518134]
ENSBTAG00000003684	16.9426	-20.608	3.56381	-5.78258	7.35623e-09	1.04134e-05	LRFN5	leucine rich repeat and fibronectin type III domain containing 5 [Source:VGNC Symbol;Acc:VGNC:30979]
ENSBTAG00000001708	3392.25	-1.13696	0.196381	-5.78958	7.05624e-09	1.04134e-05	TTLL12	tubulin tyrosine ligase like 12 [Source:VGNC Symbol;Acc:VGNC:36491]
ENSBTAG00000005884	50.894	-4.94298	0.888927	-5.56062	2.68826e-08	3.33725e-05	WDR31	WD repeat domain 31 [Source:VGNC Symbol;Acc:VGNC:36891]
ENSBTAG00000003639	3604.79	-1.34121	0.242405	-5.53294	3.14909e-08	3.60862e-05	ELMO2	engulfment and cell motility 2 [Source:VGNC Symbol;Acc:VGNC:28439]
ENSBTAG00000003014	30.0866	-21.1672	3.84185	-5.50963	3.59597e-08	3.82637e-05	TRPV2	transient receptor potential cation channel subfamily V member 2 [Source:VGNC Symbol;Acc:VGNC:36398]
ENSBTAG00000000532	1730.58	1.0514	0.197626	5.32013	1.03692e-07	0.00010298	EXO5	exonuclease 5 [Source:VGNC Symbol;Acc:VGNC:59180]
ENSBTAG00000004337	1275.92	-1.54412	0.291459	-5.29789	1.17149e-07	0.000109073	PDE1B	phosphodiesterase 1B [Source:VGNC Symbol;Acc:VGNC:32672]
ENSBTAG00000046648	46.6824	4.79411	0.91249	5.25388	1.4893e-07	0.000130507	CPA4	carboxypeptidase A4-like [Source:NCBI gene;Acc:101903427]
ENSBTAG00000019530	126.112	-2.44625	0.466583	-5.24291	1.58065e-07	0.000130817	KDM8	lysine demethylase 8 [Source:VGNC Symbol;Acc:VGNC:30534]
ENSBTAG00000010373	573.282	-1.01693	0.195319	-5.20653	1.92402e-07	0.000150853	CACTIN	cactin, spliceosome C complex subunit [Source:VGNC Symbol;Acc:VGNC:58364]
ENSBTAG00000011343	24.8146	-7.59939	1.4684	-5.1753	2.27551e-07	0.000169491	XAF1	XIAP associated factor 1 [Source:VGNC Symbol;Acc:VGNC:36982]
ENSBTAG00000010671	224.868	-2.26618	0.439861	-5.15203	2.57684e-07	0.000182796	GLI3	GLI family zinc finger 3 [Source:VGNC Symbol;Acc:VGNC:29401]
ENSBTAG00000009051	61.4135	-9.02582	1.7791	-5.07324	3.91089e-07	0.000253307	MMP19	matrix metallopeptidase 19 [Source:VGNC Symbol;Acc:VGNC:31523]
ENSBTAG00000054647	1760.35	0.830337	0.163624	5.07465	3.88205e-07	0.000253307	RPE	ribulose-5-phosphate-3-epimerase [Source:NCBI gene;Acc:533764]
ENSBTAG00000011083	2424.66	-1.27118	0.251087	-5.06269	4.13383e-07	0.00025659	POLD1	DNA polymerase delta 1, catalytic subunit [Source:VGNC Symbol;Acc:VGNC:33113]
ENSBTAG00000034373	59.3309	-9.30044	1.84242	-5.04794	4.46605e-07	0.000266123	CDH13	cadherin 13 [Source:VGNC Symbol;Acc:VGNC:27093]
ENSBTAG00000019901	5809.76	-0.865136	0.175657	-4.92514	8.43021e-07	0.000483018	RAD54L	RAD54 like [Source:VGNC Symbol;Acc:VGNC:49567]
ENSBTAG00000019915	7571.9	-1.90942	0.391433	-4.87803	1.07151e-06	0.00057008	GSN	gelsolin [Source:VGNC Symbol;Acc:VGNC:29680]
ENSBTAG00000030222	2933.29	-1.37151	0.280772	-4.88478	1.03545e-06	0.00057008	L3MBTL2	L3MBTL histone methyl-lysine binding protein 2 [Source:VGNC Symbol;Acc:VGNC:30763]
ENSBTAG00000034998	757.68	-2.05679	0.423023	-4.86212	1.16137e-06	0.000596586	SIMC1	SUMO interacting motifs containing 1 [Source:VGNC Symbol;Acc:VGNC:54482]
ENSBTAG00000003349	550.55	-1.77611	0.366093	-4.85154	1.22506e-06	0.000608326	JAKMIP2	janus kinase and microtubule interacting protein 2 [Source:VGNC Symbol;Acc:VGNC:30368]
ENSBTAG00000010694	120.878	-2.76975	0.582769	-4.75274	2.00682e-06	0.000964372	BICC1	BicC family RNA binding protein 1 [Source:VGNC Symbol;Acc:VGNC:26490]
ENSBTAG00000053171	3001.59	1.32596	0.280723	4.72336	2.31976e-06	0.00107992	ENSBTAG00000053171
ENSBTAG00000030434	5881.61	0.803743	0.17206	4.67131	2.99287e-06	0.00135105	FUCA1	alpha-L-fucosidase 1 [Source:VGNC Symbol;Acc:VGNC:29140]
ENSBTAG00000012074	32.4643	-7.03595	1.50938	-4.66149	3.13923e-06	0.00137544	MYB	MYB proto-oncogene, transcription factor [Source:VGNC Symbol;Acc:VGNC:31776]
ENSBTAG00000047225	912.828	-1.99676	0.432019	-4.62192	3.80204e-06	0.0015733	BCL2L14	BCL2 like 14 [Source:VGNC Symbol;Acc:VGNC:26448]
ENSBTAG00000002143	210.203	1.5782	0.34143	4.62234	3.79436e-06	0.0015733	DTWD2	DTW domain containing 2 [Source:VGNC Symbol;Acc:VGNC:28235]
ENSBTAG00000006208	49.4739	-3.58804	0.778714	-4.60765	4.07246e-06	0.00160235	ADCY7	adenylate cyclase 7 [Source:VGNC Symbol;Acc:VGNC:25648]
ENSBTAG00000005160	5305.57	0.644003	0.139791	4.60689	4.08736e-06	0.00160235	GTF2H1	general transcription factor IIH subunit 1 [Source:VGNC Symbol;Acc:VGNC:29695]
ENSBTAG00000010009	3824.17	0.80576	0.175131	4.60089	4.20685e-06	0.00160691	TMCO1	Bos taurus transmembrane and coiled-coil domains 1 (TMCO1), mRNA. [Source:RefSeq mRNA;Acc:NM_001034766]
ENSBTAG00000008726	214.361	-1.95602	0.43221	-4.52562	6.02182e-06	0.00218798	NCS1	neuronal calcium sensor 1 [Source:VGNC Symbol;Acc:VGNC:31928]
ENSBTAG00000045901	73051.8	0.805019	0.177686	4.53058	5.88223e-06	0.00218798	CLDN6	claudin 6 [Source:VGNC Symbol;Acc:VGNC:27418]
ENSBTAG00000046158	271.514	-3.13208	0.693878	-4.51388	6.36511e-06	0.00225764	CFB	complement factor B [Source:NCBI gene;Acc:514076]
ENSBTAG00000032493	880.489	-1.13702	0.253709	-4.48159	7.40876e-06	0.0025667	RETREG3	reticulophagy regulator family member 3 [Source:VGNC Symbol;Acc:VGNC:33880]
ENSBTAG00000012938	3106.72	-0.814553	0.182532	-4.46252	8.10004e-06	0.0027069	JARID2	jumonji and AT-rich interaction domain containing 2 [Source:VGNC Symbol;Acc:VGNC:30371]
ENSBTAG00000006715	2114.85	1.03735	0.232564	4.4605	8.17685e-06	0.0027069	FBXO8	F-box protein 8 [Source:VGNC Symbol;Acc:VGNC:28920]
ENSBTAG00000002089	1477.81	-1.09318	0.247018	-4.42552	9.62113e-06	0.00300759	FAM217A	family with sequence similarity 217 member A [Source:VGNC Symbol;Acc:VGNC:53967]
ENSBTAG00000012820	4320.39	-1.01364	0.229088	-4.42469	9.65794e-06	0.00300759	STX3	syntaxin 3 [Source:VGNC Symbol;Acc:VGNC:35439]
ENSBTAG00000017077	41371.1	1.17902	0.266508	4.42396	9.69084e-06	0.00300759	CTSV	cathepsin V [Source:NCBI gene;Acc:281108]
ENSBTAG00000010452	284.678	-2.10271	0.475931	-4.4181	9.95716e-06	0.00302718	PODXL	podocalyxin like [Source:VGNC Symbol;Acc:VGNC:53665]
ENSBTAG00000013367	4804.01	0.654388	0.148897	4.39492	1.10815e-05	0.00330163	PPT1	palmitoyl-protein thioesterase 1 [Source:VGNC Symbol;Acc:VGNC:33277]
ENSBTAG00000008611	1749.88	-1.31493	0.299771	-4.38644	1.15221e-05	0.00336559	IGFBP4	insulin like growth factor binding protein 4 [Source:VGNC Symbol;Acc:VGNC:30086]
ENSBTAG00000017091	1577.05	-1.07508	0.245497	-4.3792	1.19117e-05	0.00341248	CMTR1	cap methyltransferase 1 [Source:VGNC Symbol;Acc:VGNC:27489]
ENSBTAG00000019767	405.105	-1.89342	0.433648	-4.36626	1.26394e-05	0.00354119	MIER2	MIER family member 2 [Source:VGNC Symbol;Acc:VGNC:31470]
ENSBTAG00000052268	14457.2	0.557544	0.127793	4.36288	1.28364e-05	0.00354119	SELENOF	selenoprotein F [Source:NCBI gene;Acc:614360]
ENSBTAG00000013277	1198.26	-1.10948	0.254774	-4.35475	1.33218e-05	0.00360827	CCDC22	coiled-coil domain containing 22 [Source:VGNC Symbol;Acc:VGNC:26886]
ENSBTAG00000033319	42.8086	-8.88162	2.04406	-4.3451	1.39214e-05	0.00369991	CD200	CD200 molecule [Source:VGNC Symbol;Acc:VGNC:27010]
ENSBTAG00000053485	39.7685	-4.30394	0.991369	-4.34141	1.41569e-05	0.00369991	ZNF619	zinc finger protein 619 [Source:HGNC Symbol;Acc:HGNC:26910]
ENSBTAG00000022731	12437	0.508699	0.117312	4.33627	1.44919e-05	0.00372217	SSR1	signal sequence receptor subunit 1 [Source:VGNC Symbol;Acc:VGNC:35319]
ENSBTAG00000025263	616.012	-1.47165	0.340617	-4.32055	1.55643e-05	0.00386436	FAM160A1	family with sequence similarity 160 member A1 [Source:VGNC Symbol;Acc:VGNC:28739]
ENSBTAG00000044099	441.053	-1.15856	0.268072	-4.32184	1.54737e-05	0.00386436	ZSWIM7	zinc finger SWIM-type containing 7 [Source:VGNC Symbol;Acc:VGNC:37387]
ENSBTAG00000004392	414.32	-1.13041	0.26258	-4.30503	1.66966e-05	0.00401707	C29H11orf24	chromosome 29 C11orf24 homolog [Source:VGNC Symbol;Acc:VGNC:52698]
ENSBTAG00000054418	255.394	1.53296	0.356109	4.30473	1.67187e-05	0.00401707	ENSBTAG00000054418	endogenous retrovirus group K member 6 Gag polyprotein-like [Source:NCBI gene;Acc:112444529]
ENSBTAG00000053316	6946.74	0.815642	0.191011	4.27013	1.95357e-05	0.00461941	ENSBTAG00000053316
ENSBTAG00000012902	4412.66	0.842137	0.197416	4.26581	1.99178e-05	0.00463618	ARL8B	ADP ribosylation factor like GTPase 8B [Source:VGNC Symbol;Acc:VGNC:26154]
ENSBTAG00000039571	47.2434	-4.15026	0.976534	-4.24999	2.13779e-05	0.00489949	PROSER2	proline and serine rich 2 [Source:VGNC Symbol;Acc:VGNC:33368]
ENSBTAG00000020341	31.415	5.03894	1.18774	4.24247	2.21078e-05	0.00499	MOV10L1	Mov10 like RISC complex RNA helicase 1 [Source:VGNC Symbol;Acc:VGNC:31567]
ENSBTAG00000011375	153.998	-2.15681	0.509062	-4.23683	2.26696e-05	0.00504044	SHC3	SHC adaptor protein 3 [Source:VGNC Symbol;Acc:VGNC:34591]
ENSBTAG00000011063	172.958	-1.82008	0.430688	-4.22598	2.37905e-05	0.00504303	CTSO	cathepsin O [Source:VGNC Symbol;Acc:VGNC:53898]
ENSBTAG00000002148	295.422	-1.46431	0.346224	-4.22938	2.34339e-05	0.00504303	RAB3D	RAB3D, member RAS oncogene family [Source:VGNC Symbol;Acc:VGNC:33652]
ENSBTAG00000010389	1317.53	-1.36246	0.321861	-4.23308	2.30513e-05	0.00504303	STBD1	starch binding domain 1 [Source:VGNC Symbol;Acc:VGNC:35376]
ENSBTAG00000010126	417.384	-1.32022	0.312577	-4.22367	2.40354e-05	0.00504303	PCIF1	PDX1 C-terminal inhibiting factor 1 [Source:VGNC Symbol;Acc:VGNC:32630]
ENSBTAG00000047747	9450.25	0.615163	0.146692	4.19357	2.74599e-05	0.00568153	NDFIP1	Nedd4 family interacting protein 1 [Source:VGNC Symbol;Acc:VGNC:31934]
ENSBTAG00000035175	851.585	-0.924265	0.221244	-4.17759	2.94612e-05	0.00601211	DONSON	downstream neighbor of SON [Source:VGNC Symbol;Acc:VGNC:56216]
ENSBTAG00000014380	14833.5	-1.08136	0.259252	-4.17106	3.03181e-05	0.00602198	MCM2	minichromosome maintenance complex component 2 [Source:VGNC Symbol;Acc:VGNC:31308]
ENSBTAG00000016311	12194.4	0.539155	0.129222	4.1723	3.0154e-05	0.00602198	EIF2S1	eukaryotic translation initiation factor 2 subunit alpha [Source:VGNC Symbol;Acc:VGNC:28390]
ENSBTAG00000021065	252.178	-1.24131	0.298947	-4.15228	3.29173e-05	0.00645222	MFSD13A	major facilitator superfamily domain containing 13A [Source:VGNC Symbol;Acc:VGNC:31434]
ENSBTAG00000000854	48.4881	-2.37929	0.574437	-4.14195	3.44373e-05	0.00661782	SEC16B	SEC16 homolog B, endoplasmic reticulum export factor [Source:VGNC Symbol;Acc:VGNC:34407]
ENSBTAG00000001027	1511	-1.3865	0.33486	-4.14053	3.46506e-05	0.00661782	SERPINH1	serpin family H member 1 [Source:VGNC Symbol;Acc:VGNC:34480]
ENSBTAG00000015183	780.929	-1.04795	0.253682	-4.13097	3.61228e-05	0.00672652	TPCN2	two pore segment channel 2 [Source:VGNC Symbol;Acc:VGNC:36244]
ENSBTAG00000001425	709.402	1.03093	0.249392	4.13379	3.56833e-05	0.00672652	FBXO11	F-box protein 11 [Source:VGNC Symbol;Acc:VGNC:28892]
ENSBTAG00000010207	3516.27	0.649288	0.157484	4.12287	3.74176e-05	0.00688161	NUDT21	nudix hydrolase 21 [Source:VGNC Symbol;Acc:VGNC:32336]
ENSBTAG00000009307	3986.94	0.423192	0.10293	4.11144	3.93199e-05	0.00714328	RER1	retention in endoplasmic reticulum sorting receptor 1 [Source:VGNC Symbol;Acc:VGNC:33871]
ENSBTAG00000003232	268.314	1.51995	0.370544	4.10194	4.09702e-05	0.00735341	RAB29	RAB29, member RAS oncogene family [Source:VGNC Symbol;Acc:VGNC:33636]
ENSBTAG00000009124	1800.69	-1.22003	0.298133	-4.09223	4.2724e-05	0.00757689	FEZ1	fasciculation and elongation protein zeta 1 [Source:VGNC Symbol;Acc:VGNC:28957]
ENSBTAG00000016621	1643.78	-0.752886	0.184318	-4.08472	4.41309e-05	0.00773432	NCBP3	nuclear cap binding subunit 3 [Source:VGNC Symbol;Acc:VGNC:31909]
ENSBTAG00000000602	328.38	-1.46307	0.358859	-4.07701	4.5619e-05	0.00775292	RXRB	retinoid X receptor beta [Source:VGNC Symbol;Acc:VGNC:34231]
ENSBTAG00000018530	2332.52	-1.2584	0.308647	-4.07716	4.55894e-05	0.00775292	TUBA8	tubulin alpha 8 [Source:VGNC Symbol;Acc:VGNC:36504]
ENSBTAG00000000429	1787.11	-1.04662	0.256771	-4.0761	4.57983e-05	0.00775292	DGCR2	DiGeorge syndrome critical region gene 2 [Source:NCBI gene;Acc:767971]
ENSBTAG00000054242	1096.34	-0.823342	0.20272	-4.06146	4.87659e-05	0.00816253	AKAP17A	A-kinase anchoring protein 17A [Source:NCBI gene;Acc:100850391]
ENSBTAG00000025755	1346.65	-0.883654	0.217867	-4.05592	4.99364e-05	0.00826559	RNF212B	ring finger protein 212B [Source:VGNC Symbol;Acc:VGNC:34050]
ENSBTAG00000010742	27.2175	-7.59364	1.88088	-4.03728	5.40743e-05	0.00875592	PKD2L1	polycystin 2 like 1, transient receptor potential cation channel [Source:VGNC Symbol;Acc:VGNC:32936]
ENSBTAG00000018431	557.737	-0.995435	0.246515	-4.03803	5.39025e-05	0.00875592	NAV2	neuron navigator 2 [Source:VGNC Symbol;Acc:VGNC:31891]
ENSBTAG00000003256	374.812	-0.927123	0.229948	-4.03189	5.53303e-05	0.00886296	TOMM34	translocase of outer mitochondrial membrane 34 [Source:VGNC Symbol;Acc:VGNC:49135]
ENSBTAG00000013436	1114.91	-1.16636	0.290245	-4.01853	5.85634e-05	0.00928106	HAUS5	HAUS augmin like complex subunit 5 [Source:VGNC Symbol;Acc:VGNC:29760]
ENSBTAG00000017225	2064.08	-0.962854	0.240393	-4.00534	6.19286e-05	0.00969057	RNF135	ring finger protein 135 [Source:VGNC Symbol;Acc:VGNC:57150]
ENSBTAG00000050965	1357	1.12334	0.2806	4.00336	6.24485e-05	0.00969057	ENSBTAG00000050965
ENSBTAG00000055052	607.403	1.10823	0.277251	3.9972	6.40961e-05	0.00984371	ENSBTAG00000055052
ENSBTAG00000007865	11410.4	0.759319	0.190235	3.99147	6.56648e-05	0.00998171	GNPDA1	glucosamine-6-phosphate deaminase 1 [Source:VGNC Symbol;Acc:VGNC:29476]
ENSBTAG00000005694	9767.01	0.51346	0.129023	3.97961	6.90293e-05	0.0103872	TMED10	transmembrane p24 trafficking protein 10 [Source:VGNC Symbol;Acc:VGNC:35935]
ENSBTAG00000020115	510.639	-1.04116	0.26274	-3.96271	7.41038e-05	0.0110393	UBE2O	ubiquitin conjugating enzyme E2 O [Source:VGNC Symbol;Acc:VGNC:36591]
ENSBTAG00000050061	773.324	-0.967461	0.244395	-3.95859	7.53942e-05	0.0111203	INCENP	inner centromere protein [Source:NCBI gene;Acc:507693]
ENSBTAG00000008883	14590.6	0.510154	0.128995	3.95484	7.65851e-05	0.0111852	ZNF207	zinc finger protein 207 [Source:VGNC Symbol;Acc:VGNC:37225]
ENSBTAG00000000815	267.87	-1.37511	0.348601	-3.94465	7.9917e-05	0.0115585	EPHA2	EPH receptor A2 [Source:VGNC Symbol;Acc:VGNC:28534]
ENSBTAG00000021677	2091.98	-0.859358	0.218069	-3.94075	8.12259e-05	0.0116348	TRIM37	tripartite motif containing 37 [Source:VGNC Symbol;Acc:VGNC:36332]
ENSBTAG00000007066	1927.39	-0.730376	0.18565	-3.93415	8.34906e-05	0.0118453	TMTC4	transmembrane O-mannosyltransferase targeting cadherins 4 [Source:VGNC Symbol;Acc:VGNC:36148]
ENSBTAG00000046192	1397.74	0.823961	0.209657	3.93005	8.4928e-05	0.0119356	AK6	adenylate kinase 6 [Source:VGNC Symbol;Acc:VGNC:25775]
ENSBTAG00000049108	28.1686	-7.0887	1.80862	-3.9194	8.87697e-05	0.0123187	TRAT1	T cell receptor associated transmembrane adaptor 1 [Source:NCBI gene;Acc:614942]
ENSBTAG00000017240	331.719	-1.43737	0.366868	-3.91794	8.93076e-05	0.0123187	DGKQ	diacylglycerol kinase theta [Source:VGNC Symbol;Acc:VGNC:28031]
ENSBTAG00000008142	53.6158	-8.66562	2.21397	-3.91406	9.07552e-05	0.0124035	IFIH1	interferon induced with helicase C domain 1 [Source:VGNC Symbol;Acc:VGNC:30048]
ENSBTAG00000003788	1773.82	-0.952896	0.243621	-3.91139	9.17657e-05	0.0124276	RCC1	regulator of chromosome condensation 1 [Source:VGNC Symbol;Acc:VGNC:33825]
ENSBTAG00000017801	8931	0.619225	0.158414	3.90891	9.27127e-05	0.0124427	ATP6AP2	ATPase H+ transporting accessory protein 2 [Source:NCBI gene;Acc:513520]
ENSBTAG00000005757	3859.49	-1.09277	0.280039	-3.9022	9.53212e-05	0.0125494	FUS	FUS RNA binding protein [Source:VGNC Symbol;Acc:VGNC:29147]
ENSBTAG00000011044	2548.2	-0.783923	0.200944	-3.9012	9.57184e-05	0.0125494	TACC3	transforming acidic coiled-coil containing protein 3 [Source:VGNC Symbol;Acc:VGNC:53778]
ENSBTAG00000039618	2504.58	-0.68456	0.17551	-3.9004	9.60346e-05	0.0125494	ARL14EPL	ADP ribosylation factor like GTPase 14 effector protein like [Source:NCBI gene;Acc:616348]
ENSBTAG00000007093	256.409	-1.21719	0.312316	-3.89732	9.7265e-05	0.0125996	ENSBTAG00000007093
ENSBTAG00000011820	81.3084	-3.60027	0.927924	-3.87992	0.00010449	0.012646	DAPK2	death associated protein kinase 2 [Source:VGNC Symbol;Acc:VGNC:55109]
ENSBTAG00000039719	1152.92	-1.6466	0.42378	-3.88551	0.000102114	0.012646	PHGDH	phosphoglycerate dehydrogenase [Source:VGNC Symbol;Acc:VGNC:55654]
ENSBTAG00000007550	414.283	-1.35191	0.348392	-3.88042	0.000104274	0.012646	OLFM2	olfactomedin 2 [Source:VGNC Symbol;Acc:VGNC:32418]
ENSBTAG00000021058	1935.91	-0.954426	0.246125	-3.8778	0.000105404	0.012646	DDX42	DEAD-box helicase 42 [Source:VGNC Symbol;Acc:VGNC:27968]
ENSBTAG00000009765	6630.78	-0.531762	0.136716	-3.88954	0.000100433	0.012646	MTMR14	myotubularin related protein 14 [Source:VGNC Symbol;Acc:VGNC:31740]
ENSBTAG00000010204	4397.56	0.524378	0.134962	3.88538	0.000102171	0.012646	PCMT1	protein-L-isoaspartate (D-aspartate) O-methyltransferase [Source:VGNC Symbol;Acc:VGNC:53799]
ENSBTAG00000020630	7169.72	0.588174	0.15125	3.88875	0.00010076	0.012646	KCMF1	potassium channel modulatory factor 1 [Source:VGNC Symbol;Acc:VGNC:30419]
ENSBTAG00000014392	3459.71	0.689229	0.177812	3.87617	0.000106112	0.012646	ACTR10	actin related protein 10 [Source:VGNC Symbol;Acc:VGNC:25584]
ENSBTAG00000003746	5645.86	0.691581	0.178129	3.88247	0.000103401	0.012646	SCP2	sterol carrier protein 2 [Source:VGNC Symbol;Acc:VGNC:34361]
ENSBTAG00000015848	457.49	1.50769	0.388062	3.88518	0.000102256	0.012646	PHKA1	phosphorylase kinase regulatory subunit alpha 1 [Source:VGNC Symbol;Acc:VGNC:32830]
ENSBTAG00000053484	533.137	-1.36408	0.352221	-3.87281	0.000107589	0.0127202	CTDP1	CTD phosphatase subunit 1 [Source:NCBI gene;Acc:100336537]
ENSBTAG00000021226	453.646	1.35033	0.349535	3.86322	0.000111904	0.0131263	SAR1B	secretion associated Ras related GTPase 1B [Source:VGNC Symbol;Acc:VGNC:34287]
ENSBTAG00000018801	16495.2	0.628012	0.163021	3.85235	0.00011699	0.0136156	SNX3	sorting nexin 3 [Source:VGNC Symbol;Acc:VGNC:35107]
ENSBTAG00000016648	119550	0.479663	0.124688	3.84691	0.000119616	0.0138133	BSG	basigin [Source:VGNC Symbol;Acc:VGNC:52220]
ENSBTAG00000016159	87.6803	-2.17425	0.567541	-3.831	0.000127623	0.014513	NPBWR1	neuropeptides B and W receptor 1 [Source:VGNC Symbol;Acc:VGNC:32193]
ENSBTAG00000011554	1808.59	-1.25314	0.32699	-3.83234	0.000126931	0.014513	SURF6	surfeit 6 [Source:VGNC Symbol;Acc:VGNC:35485]
ENSBTAG00000021617	442.017	-1.76968	0.462225	-3.82861	0.000128872	0.0145439	ZC3HAV1	zinc finger CCCH-type containing, antiviral 1 [Source:VGNC Symbol;Acc:VGNC:37111]
ENSBTAG00000002454	2242.91	0.654571	0.171219	3.82301	0.000131831	0.014766	ALG2	ALG2 alpha-1,3/1,6-mannosyltransferase [Source:VGNC Symbol;Acc:VGNC:25827]
ENSBTAG00000002211	113.232	-1.75971	0.460588	-3.82057	0.000133145	0.0148019	MAPK8IP3	mitogen-activated protein kinase 8 interacting protein 3 [Source:VGNC Symbol;Acc:VGNC:31226]
ENSBTAG00000025494	53.3897	-7.73095	2.02627	-3.81537	0.000135981	0.0148949	PAQR8	progestin and adipoQ receptor family member 8 [Source:VGNC Symbol;Acc:VGNC:32580]
ENSBTAG00000009157	607.383	0.966378	0.253227	3.81625	0.000135495	0.0148949	SLC35B3	solute carrier family 35 member B3 [Source:VGNC Symbol;Acc:VGNC:34825]
ENSBTAG00000009376	1477.03	-0.927583	0.243852	-3.80387	0.000142451	0.0154897	DPH1	diphthamide biosynthesis 1 [Source:VGNC Symbol;Acc:VGNC:28178]
ENSBTAG00000009685	2339.54	0.74172	0.195145	3.80087	0.000144187	0.0155649	ERI1	exoribonuclease 1 [Source:NCBI gene;Acc:540728]
ENSBTAG00000003109	31759.8	0.859454	0.226266	3.79842	0.000145619	0.0156064	ITM2B	integral membrane protein 2B [Source:VGNC Symbol;Acc:VGNC:30340]
ENSBTAG00000033166	785.455	1.20213	0.317267	3.78903	0.000151237	0.0160927	ENSBTAG00000033166
ENSBTAG00000000259	19.0833	-7.72155	2.04135	-3.78257	0.000155218	0.0161515	CHIA	chitinase acidic [Source:VGNC Symbol;Acc:VGNC:55040]
ENSBTAG00000016591	358.485	-1.22962	0.325355	-3.77933	0.000157253	0.0161515	RAB11FIP3	RAB11 family interacting protein 3 [Source:VGNC Symbol;Acc:VGNC:33618]
ENSBTAG00000010236	1435.69	-1.16616	0.308418	-3.78112	0.000156127	0.0161515	CIDEB	cell death inducing DFFA like effector b [Source:VGNC Symbol;Acc:VGNC:27364]
ENSBTAG00000001698	1156.43	-1.11469	0.294754	-3.78176	0.000155721	0.0161515	CHTF8	chromosome transmission fidelity factor 8 [Source:NCBI gene;Acc:618186]
ENSBTAG00000003017	756.137	-1.0961	0.290152	-3.77768	0.000158294	0.0161515	TTC38	tetratricopeptide repeat domain 38 [Source:VGNC Symbol;Acc:VGNC:36474]
ENSBTAG00000053930	469.682	0.658958	0.174285	3.78091	0.000156254	0.0161515	ENSBTAG00000053930
ENSBTAG00000018889	18280.9	0.606556	0.160665	3.77528	0.000159828	0.016197	ATP6V0B	ATPase H+ transporting V0 subunit b [Source:VGNC Symbol;Acc:VGNC:26310]
ENSBTAG00000015172	21524.6	-0.609414	0.161597	-3.7712	0.000162461	0.0163526	MCM6	minichromosome maintenance complex component 6 [Source:VGNC Symbol;Acc:VGNC:31312]
ENSBTAG00000012629	15.3133	-6.85177	1.82629	-3.75173	0.000175616	0.017441	ZNF362	zinc finger protein 362 [Source:VGNC Symbol;Acc:VGNC:37258]
ENSBTAG00000030502	13.4922	7.70267	2.05293	3.75203	0.000175407	0.017441	ENSBTAG00000030502	orphan sodium- and chloride-dependent neurotransmitter transporter NTT5 [Source:NCBI gene;Acc:785933]
ENSBTAG00000013338	872.21	-1.56273	0.417172	-3.74601	0.000179668	0.0175184	SLC7A9	solute carrier family 7 member 9 [Source:VGNC Symbol;Acc:VGNC:34934]
ENSBTAG00000002209	2014.04	-0.959333	0.256056	-3.74658	0.000179263	0.0175184	JPT2	Jupiter microtubule associated homolog 2 [Source:VGNC Symbol;Acc:VGNC:30384]
ENSBTAG00000004024	1816.25	0.786646	0.210015	3.74566	0.000179923	0.0175184	UBE2Q2	ubiquitin conjugating enzyme E2 Q2 [Source:VGNC Symbol;Acc:VGNC:36593]
ENSBTAG00000006099	3310.74	-0.711432	0.190694	-3.73075	0.000190909	0.0184673	PIP5K1A	phosphatidylinositol-4-phosphate 5-kinase type 1 alpha [Source:VGNC Symbol;Acc:VGNC:55656]
ENSBTAG00000003866	1154.86	-0.749287	0.201316	-3.72195	0.000197688	0.0187576	PPP1R8	protein phosphatase 1 regulatory subunit 8 [Source:VGNC Symbol;Acc:VGNC:33249]
ENSBTAG00000001700	5323.96	0.593182	0.159327	3.72305	0.000196834	0.0187576	CDC42	cell division cycle 42 [Source:NCBI gene;Acc:532712]
ENSBTAG00000004398	301.401	1.1633	0.312295	3.72501	0.000195304	0.0187576	IMMP2L	inner mitochondrial membrane peptidase subunit 2 [Source:VGNC Symbol;Acc:VGNC:57350]
ENSBTAG00000021506	4750.7	0.756837	0.204366	3.70334	0.000212783	0.0200622	ARL6IP5	ADP ribosylation factor like GTPase 6 interacting protein 5 [Source:VGNC Symbol;Acc:VGNC:26151]
ENSBTAG00000020459	2697.43	-0.631058	0.170511	-3.70098	0.000214771	0.0201223	TIMELESS	timeless circadian regulator [Source:VGNC Symbol;Acc:VGNC:35869]
ENSBTAG00000008468	509.118	-0.947415	0.256519	-3.69335	0.000221316	0.0206059	AGAP3	ArfGAP with GTPase domain, ankyrin repeat and PH domain 3 [Source:VGNC Symbol;Acc:VGNC:25721]
ENSBTAG00000020413	203.571	-3.21607	0.872176	-3.68741	0.00022655	0.0209622	APBA2	amyloid beta precursor protein binding family A member 2 [Source:VGNC Symbol;Acc:VGNC:26001]
ENSBTAG00000016548	206.94	1.14508	0.311166	3.67997	0.000233259	0.0214498	TEX12	testis expressed 12 [Source:VGNC Symbol;Acc:VGNC:35761]
ENSBTAG00000021191	13.463	-7.13534	1.94208	-3.67407	0.00023872	0.0216842	EHD2	EH domain containing 2 [Source:VGNC Symbol;Acc:VGNC:28372]
ENSBTAG00000009084	4072.83	0.51083	0.13901	3.67476	0.000238073	0.0216842	ATG3	autophagy related 3 [Source:VGNC Symbol;Acc:VGNC:26256]
ENSBTAG00000023675	681.199	1.11782	0.305037	3.66453	0.000247793	0.0223719	ZNF654	zinc finger protein 654 [Source:VGNC Symbol;Acc:VGNC:55090]
ENSBTAG00000040076	4409.49	-0.500388	0.136643	-3.66201	0.000250244	0.0224571	ILF3	interleukin enhancer binding factor 3 [Source:VGNC Symbol;Acc:VGNC:30176]
ENSBTAG00000003209	1635.1	0.731025	0.19973	3.66006	0.000252157	0.0224933	BLCAP	BLCAP apoptosis inducing factor [Source:VGNC Symbol;Acc:VGNC:54701]
ENSBTAG00000008169	220.495	-1.42529	0.389991	-3.65468	0.000257505	0.0228336	C24H18orf54	chromosome 24 C18orf54 homolog [Source:VGNC Symbol;Acc:VGNC:52683]
ENSBTAG00000009677	158.562	-1.84489	0.508222	-3.63008	0.000283329	0.0248279	PARP10	poly(ADP-ribose) polymerase family member 10 [Source:NCBI gene;Acc:510991]
ENSBTAG00000010899	3185.43	0.984704	0.271252	3.63021	0.000283186	0.0248279	TIMP2	TIMP metallopeptidase inhibitor 2 [Source:VGNC Symbol;Acc:VGNC:35871]
ENSBTAG00000010264	119.997	-1.92828	0.53172	-3.62651	0.000287281	0.0248816	FBXL18	F-box and leucine rich repeat protein 18 [Source:VGNC Symbol;Acc:VGNC:52774]
ENSBTAG00000019937	3507	-0.464985	0.128174	-3.62777	0.000285883	0.0248816	WDR3	WD repeat domain 3 [Source:VGNC Symbol;Acc:VGNC:36890]
ENSBTAG00000008734	2603.12	0.907499	0.251106	3.61401	0.000301498	0.025962	PM20D1	peptidase M20 domain containing 1 [Source:VGNC Symbol;Acc:VGNC:33066]
ENSBTAG00000007638	88.9914	-1.55765	0.431536	-3.60954	0.000306743	0.0262618	PIF1	PIF1 5'-to-3' DNA helicase [Source:VGNC Symbol;Acc:VGNC:32866]
ENSBTAG00000012849	4074.84	-1.04576	0.290438	-3.60062	0.000317458	0.0270238	COL4A1	collagen type IV alpha 1 chain [Source:VGNC Symbol;Acc:VGNC:50081]
ENSBTAG00000003458	2417.41	-1.24235	0.345316	-3.59773	0.000321004	0.0271704	CDCA7	cell division cycle associated 7 [Source:VGNC Symbol;Acc:VGNC:27086]
ENSBTAG00000027321	437.53	1.56654	0.435705	3.59541	0.000323877	0.0272587	CCDC18	coiled-coil domain containing 18 [Source:VGNC Symbol;Acc:VGNC:26875]
ENSBTAG00000014719	629.564	-0.950744	0.265023	-3.58741	0.000333979	0.0273077	TMOD1	tropomodulin 1 [Source:VGNC Symbol;Acc:VGNC:36135]
ENSBTAG00000038051	1733.92	-0.821395	0.22931	-3.58202	0.000340942	0.0273077	ENSBTAG00000038051	AFG3-like protein 1 [Source:NCBI gene;Acc:532875]
ENSBTAG00000015343	2204.33	-0.808113	0.22514	-3.58938	0.000331464	0.0273077	WDR34	WD repeat domain 34 [Source:VGNC Symbol;Acc:VGNC:36893]
ENSBTAG00000002736	443.435	-0.744801	0.207633	-3.5871	0.00033437	0.0273077	DNMT1	DNA methyltransferase 1 [Source:VGNC Symbol;Acc:VGNC:28145]
ENSBTAG00000011608	4364.98	-0.675147	0.188429	-3.58302	0.000339639	0.0273077	KIAA1191	KIAA1191 [Source:VGNC Symbol;Acc:VGNC:30565]
ENSBTAG00000006395	6103.89	-0.593054	0.165564	-3.58201	0.000340956	0.0273077	TUBGCP2	tubulin gamma complex associated protein 2 [Source:VGNC Symbol;Acc:VGNC:36512]
ENSBTAG00000014032	5234.86	0.545618	0.151926	3.59135	0.000328974	0.0273077	EIF3H	eukaryotic translation initiation factor 3 subunit H [Source:VGNC Symbol;Acc:VGNC:28398]
ENSBTAG00000002703	8035.22	0.674704	0.18808	3.58733	0.000334086	0.0273077	ATP6V1A	ATPase H+ transporting V1 subunit A [Source:VGNC Symbol;Acc:VGNC:26316]
ENSBTAG00000013664	416.776	1.01141	0.282132	3.58487	0.000337242	0.0273077	FILIP1L	filamin A interacting protein 1 like [Source:VGNC Symbol;Acc:VGNC:29013]
ENSBTAG00000010029	914.594	-1.15206	0.321791	-3.58014	0.00034341	0.0273571	ERC2	ELKS/RAB6-interacting/CAST family member 2 [Source:VGNC Symbol;Acc:VGNC:28567]
ENSBTAG00000007430	4533.56	-1.31644	0.368271	-3.57464	0.000350706	0.0277029	MYBBP1A	MYB binding protein 1a [Source:VGNC Symbol;Acc:VGNC:31777]
ENSBTAG00000011865	7728.49	-0.697531	0.195164	-3.57407	0.00035147	0.0277029	MTA2	metastasis associated 1 family member 2 [Source:VGNC Symbol;Acc:VGNC:31714]
ENSBTAG00000021008	15.0012	-6.75495	1.89555	-3.56358	0.000365834	0.0277522	ZNF219	zinc finger protein 219 [Source:VGNC Symbol;Acc:VGNC:37229]
ENSBTAG00000043987	549.445	-1.43475	0.402818	-3.56177	0.000368364	0.0277522	KDM4C	lysine demethylase 4C [Source:VGNC Symbol;Acc:VGNC:30529]
ENSBTAG00000030629	2091.28	-1.00603	0.28248	-3.56141	0.000368862	0.0277522	MGC127133	20-beta-hydroxysteroid dehydrogenase-like [Source:NCBI gene;Acc:510180]
ENSBTAG00000020440	923.366	-0.986795	0.276379	-3.57044	0.000356387	0.0277522	ENSBTAG00000020440	pentatricopeptide repeat domain 1 [Source:NCBI gene;Acc:101910000]
ENSBTAG00000001113	1070.54	-0.704181	0.197557	-3.56444	0.000364635	0.0277522	NDUFAF7	NADH:ubiquinone oxidoreductase complex assembly factor 7 [Source:VGNC Symbol;Acc:VGNC:31959]
ENSBTAG00000005265	693.994	0.734236	0.205634	3.57059	0.000356174	0.0277522	ZCCHC9	zinc finger CCHC-type containing 9 [Source:NCBI gene;Acc:506049]
ENSBTAG00000050847	4675.5	0.921853	0.258352	3.56821	0.000359429	0.0277522	ENSBTAG00000050847
ENSBTAG00000021829	24111.5	1.31366	0.368612	3.5638	0.000365519	0.0277522	GM2A	GM2 ganglioside activator [Source:VGNC Symbol;Acc:VGNC:29431]
ENSBTAG00000023007	293.633	1.92881	0.541083	3.56472	0.000364239	0.0277522	ENSBTAG00000023007	sodium/glucose cotransporter 1-like [Source:NCBI gene;Acc:531152]
ENSBTAG00000016606	923.499	0.964774	0.271005	3.55999	0.000370873	0.0277633	PCGF1	polycomb group ring finger 1 [Source:VGNC Symbol;Acc:VGNC:32626]
ENSBTAG00000017198	15.7761	-6.8687	1.93561	-3.5486	0.000387279	0.0287003	CHRNA4	cholinergic receptor nicotinic alpha 4 subunit [Source:VGNC Symbol;Acc:VGNC:27326]
ENSBTAG00000005808	4153.53	0.586777	0.165315	3.54945	0.000386039	0.0287003	TMEM14C	transmembrane protein 14C [Source:NCBI gene;Acc:613802]
ENSBTAG00000016514	552.065	0.881682	0.248549	3.54732	0.000389169	0.0287003	CPE	carboxypeptidase E [Source:VGNC Symbol;Acc:VGNC:27648]
ENSBTAG00000015037	30.0876	-3.65803	1.03252	-3.54281	0.000395885	0.0289093	GAREM2	GRB2 associated regulator of MAPK1 subtype 2 [Source:VGNC Symbol;Acc:VGNC:58378]
ENSBTAG00000011136	2264.51	-0.783963	0.221234	-3.54359	0.000394716	0.0289093	NR2F6	nuclear receptor subfamily 2 group F member 6 [Source:VGNC Symbol;Acc:VGNC:32242]
ENSBTAG00000008898	105.331	-1.55951	0.441167	-3.53496	0.000407843	0.0295559	GBX2	gastrulation brain homeobox 2 [Source:VGNC Symbol;Acc:VGNC:29276]
ENSBTAG00000016735	892.352	-1.0303	0.291612	-3.53312	0.000410691	0.0295559	ZBTB48	zinc finger and BTB domain containing 48 [Source:VGNC Symbol;Acc:VGNC:37085]
ENSBTAG00000003882	6265.43	0.342402	0.0969096	3.53321	0.000410553	0.0295559	EMC3	ER membrane protein complex subunit 3 [Source:VGNC Symbol;Acc:VGNC:28464]
ENSBTAG00000013485	699.825	-1.34302	0.381017	-3.52485	0.000423728	0.0300584	ZFYVE19	zinc finger FYVE-type containing 19 [Source:VGNC Symbol;Acc:VGNC:37175]
ENSBTAG00000011046	1899.64	0.779521	0.221041	3.52659	0.000420943	0.0300584	CDK7	cyclin dependent kinase 7 [Source:VGNC Symbol;Acc:VGNC:27134]
ENSBTAG00000054881	87.5584	1.84655	0.523826	3.52513	0.000423274	0.0300584	RNLS	renalase, FAD dependent amine oxidase [Source:NCBI gene;Acc:534778]
ENSBTAG00000000297	2409.88	-0.470886	0.133987	-3.51443	0.000440705	0.0311146	ZNF330	zinc finger protein 330 [Source:NCBI gene;Acc:533230]
ENSBTAG00000005371	4305.83	0.53659	0.152892	3.50961	0.000448756	0.0313855	DPAGT1	dolichyl-phosphate N-acetylglucosaminephosphotransferase 1 [Source:VGNC Symbol;Acc:VGNC:28174]
ENSBTAG00000011895	2780.66	0.633721	0.180532	3.51029	0.000447612	0.0313855	PANK3	pantothenate kinase 3 [Source:VGNC Symbol;Acc:VGNC:32565]
ENSBTAG00000001537	1148.78	-1.22807	0.350586	-3.50292	0.000460194	0.0320351	TSKU	tsukushi, small leucine rich proteoglycan [Source:VGNC Symbol;Acc:VGNC:54896]
ENSBTAG00000020079	1089.49	-0.710968	0.203354	-3.49621	0.000471918	0.0326984	MAP3K4	mitogen-activated protein kinase kinase kinase 4 [Source:VGNC Symbol;Acc:VGNC:31197]
ENSBTAG00000007635	26.6398	-7.89383	2.25919	-3.49409	0.000475674	0.0327767	PLCL1	phospholipase C like 1 (inactive) [Source:VGNC Symbol;Acc:VGNC:56161]
ENSBTAG00000011456	758.575	-0.675505	0.193383	-3.4931	0.000477448	0.0327767	NT5C3B	5'-nucleotidase, cytosolic IIIB [Source:VGNC Symbol;Acc:VGNC:32293]
ENSBTAG00000003409	1255.76	-0.825923	0.236735	-3.48881	0.000485182	0.0331548	FKBP1B	FKBP prolyl isomerase 1B [Source:VGNC Symbol;Acc:VGNC:29021]
ENSBTAG00000022167	2684.55	0.626553	0.17971	3.48647	0.000489443	0.0332933	DERA	deoxyribose-phosphate aldolase [Source:VGNC Symbol;Acc:VGNC:28009]
ENSBTAG00000011173	225.751	-1.45517	0.417849	-3.48252	0.000496713	0.0334821	FAM189A2	family with sequence similarity 189 member A2 [Source:VGNC Symbol;Acc:VGNC:54429]
ENSBTAG00000008181	1816.26	-0.875626	0.251382	-3.48326	0.000495355	0.0334821	CHAF1A	chromatin assembly factor 1 subunit A [Source:VGNC Symbol;Acc:VGNC:27266]
ENSBTAG00000000056	381.527	-1.26343	0.362999	-3.48052	0.000500434	0.03351	STRADA	STE20 related adaptor alpha [Source:VGNC Symbol;Acc:VGNC:35418]
ENSBTAG00000021519	5729.33	0.52351	0.150468	3.47921	0.0005029	0.03351	CAMLG	calcium modulating ligand [Source:VGNC Symbol;Acc:VGNC:26729]
ENSBTAG00000013860	1126.92	0.946258	0.272016	3.47869	0.000503877	0.03351	GADD45A	growth arrest and DNA damage inducible alpha [Source:VGNC Symbol;Acc:VGNC:29206]
ENSBTAG00000004452	2298.54	-0.766452	0.220661	-3.47344	0.00051384	0.0338592	IPO9	importin 9 [Source:VGNC Symbol;Acc:VGNC:30246]
ENSBTAG00000001144	4073.17	0.544743	0.156881	3.47234	0.000515946	0.0338592	NAA20	N(alpha)-acetyltransferase 20, NatB catalytic subunit [Source:VGNC Symbol;Acc:VGNC:57011]
ENSBTAG00000002245	258.75	2.1871	0.629539	3.47413	0.000512505	0.0338592	MRGPRX2	MAS related GPR family member X2 [Source:NCBI gene;Acc:516646]
ENSBTAG00000021896	1495.32	0.98641	0.284218	3.47061	0.000519277	0.0339284	NUP214	nucleoporin 214 [Source:VGNC Symbol;Acc:VGNC:32358]
ENSBTAG00000006441	18165.3	0.466382	0.134797	3.45988	0.000540419	0.0350027	ATP5PB	ATP synthase peripheral stalk-membrane subunit b [Source:VGNC Symbol;Acc:VGNC:26303]
ENSBTAG00000017161	349.341	0.91294	0.263813	3.46056	0.000539045	0.0350027	TM2D1	TM2 domain containing 1 [Source:VGNC Symbol;Acc:VGNC:35900]
ENSBTAG00000006607	17101.4	0.759738	0.219714	3.45785	0.000544502	0.0351145	CCNG1	cyclin G1 [Source:VGNC Symbol;Acc:VGNC:26969]
ENSBTAG00000021652	18.9475	-4.9461	1.4327	-3.45229	0.000555855	0.0353119	PDZD9	PDZ domain containing 9 [Source:VGNC Symbol;Acc:VGNC:32729]
ENSBTAG00000003509	112.615	-2.11012	0.611335	-3.45166	0.000557147	0.0353119	PLEKHA2	pleckstrin homology domain containing A2 [Source:VGNC Symbol;Acc:VGNC:33004]
ENSBTAG00000010727	647.939	-0.633725	0.183658	-3.45056	0.000559414	0.0353119	ATG4D	autophagy related 4D cysteine peptidase [Source:VGNC Symbol;Acc:VGNC:26260]
ENSBTAG00000044075	8055.38	0.578874	0.167692	3.45201	0.000556423	0.0353119	SRPRB	SRP receptor subunit beta [Source:VGNC Symbol;Acc:VGNC:35291]
ENSBTAG00000017666	3115.56	0.763643	0.221139	3.45323	0.000553909	0.0353119	ABCC5	ATP binding cassette subfamily C member 5 [Source:VGNC Symbol;Acc:VGNC:25474]
ENSBTAG00000012412	448.855	-1.51621	0.439662	-3.44859	0.000563529	0.0354215	URB1	URB1 ribosome biogenesis 1 homolog (S. cerevisiae) [Source:VGNC Symbol;Acc:VGNC:53611]
ENSBTAG00000033010	2850.06	-0.584032	0.169665	-3.44226	0.000576866	0.0361074	TTC27	tetratricopeptide repeat domain 27 [Source:VGNC Symbol;Acc:VGNC:36466]
ENSBTAG00000020896	13.3622	-6.53593	1.89998	-3.43999	0.000581732	0.0362597	GRIFIN	galectin-related inter-fiber protein [Source:VGNC Symbol;Acc:VGNC:29642]
ENSBTAG00000045500	42.2171	-3.06619	0.893448	-3.43186	0.000599456	0.0371036	SGSM2	small G protein signaling modulator 2 [Source:VGNC Symbol;Acc:VGNC:34551]
ENSBTAG00000046033	3977.77	0.448298	0.130642	3.4315	0.000600253	0.0371036	UBFD1	ubiquitin family domain containing 1 [Source:VGNC Symbol;Acc:VGNC:36605]
ENSBTAG00000001242	13.7804	-6.93181	2.02397	-3.42486	0.000615111	0.0373675	ADRB1	adrenoceptor beta 1 [Source:VGNC Symbol;Acc:VGNC:50130]
ENSBTAG00000023426	79.4357	-2.1893	0.639504	-3.42343	0.000618364	0.0373675	FAIM	Fas apoptotic inhibitory molecule [Source:VGNC Symbol;Acc:VGNC:28709]
ENSBTAG00000008835	2399.19	-0.555137	0.162048	-3.42577	0.000613069	0.0373675	GPANK1	G-patch domain and ankyrin repeats 1 [Source:VGNC Symbol;Acc:VGNC:29511]
ENSBTAG00000050696	4900.65	-0.537068	0.156904	-3.4229	0.000619572	0.0373675	KLHDC3	kelch domain containing 3 [Source:NCBI gene;Acc:541138]
ENSBTAG00000022539	2139.06	0.710127	0.20721	3.42709	0.000610081	0.0373675	POLR2K	RNA polymerase II subunit K [Source:VGNC Symbol;Acc:VGNC:57357]
ENSBTAG00000050251	143.881	1.07151	0.312639	3.42729	0.000609642	0.0373675	ENSBTAG00000050251
ENSBTAG00000012262	25.1307	-5.64877	1.65382	-3.41558	0.000636464	0.0377745	FBXO10	F-box protein 10 [Source:VGNC Symbol;Acc:VGNC:53303]
ENSBTAG00000044007	48.9467	-4.34726	1.27206	-3.41748	0.000632031	0.0377745	KLF12	Kruppel like factor 12 [Source:VGNC Symbol;Acc:VGNC:30628]
ENSBTAG00000018978	875.526	-0.755448	0.221049	-3.41756	0.000631848	0.0377745	KAT14	lysine acetyltransferase 14 [Source:VGNC Symbol;Acc:VGNC:30397]
ENSBTAG00000003089	417.407	1.70621	0.499528	3.41564	0.000636312	0.0377745	RHPN2	rhophilin Rho GTPase binding protein 2 [Source:VGNC Symbol;Acc:VGNC:52240]
ENSBTAG00000000462	296.566	-1.1363	0.332972	-3.41261	0.000643441	0.0380246	CCDC102A	coiled-coil domain containing 102A [Source:VGNC Symbol;Acc:VGNC:26829]
ENSBTAG00000018381	3031.75	0.769131	0.225445	3.41162	0.000645782	0.0380246	CRLF3	cytokine receptor like factor 3 [Source:VGNC Symbol;Acc:VGNC:27718]
ENSBTAG00000047582	321.292	-1.16336	0.341422	-3.40739	0.000655871	0.038166	CSNK1E	casein kinase 1, epsilon [Source:NCBI gene;Acc:768234]
ENSBTAG00000047418	18821.2	-0.584726	0.171544	-3.40861	0.000652956	0.038166	SLC25A6	solute carrier family 25 member 6 [Source:VGNC Symbol;Acc:VGNC:49967]
ENSBTAG00000011986	378.13	1.184	0.347439	3.40778	0.000654937	0.038166	PLSCR4	phospholipid scramblase 4 [Source:VGNC Symbol;Acc:VGNC:33053]
ENSBTAG00000005028	318.705	-1.40841	0.413749	-3.40403	0.000663998	0.0384886	HIRIP3	HIRA interacting protein 3 [Source:VGNC Symbol;Acc:VGNC:29862]
ENSBTAG00000022635	551.428	-1.22943	0.361866	-3.39746	0.000680135	0.0391201	LAMB2	laminin, beta 2 (laminin S) [Source:NCBI gene;Acc:520167]
ENSBTAG00000005892	2309.76	-0.859902	0.253101	-3.39746	0.000680143	0.0391201	ZAP70	zeta chain of T cell receptor associated protein kinase 70 [Source:VGNC Symbol;Acc:VGNC:37050]
ENSBTAG00000020043	1347.5	-0.663818	0.195798	-3.39031	0.000698129	0.0399848	ARHGAP17	Rho GTPase activating protein 17 [Source:VGNC Symbol;Acc:VGNC:26077]
ENSBTAG00000025372	5657.98	-0.489843	0.144523	-3.38937	0.000700547	0.0399848	RIOX1	ribosomal oxygenase 1 [Source:VGNC Symbol;Acc:VGNC:55141]
ENSBTAG00000033041	2165.27	0.536772	0.158587	3.38472	0.000712508	0.0403583	YIPF4	Yip1 domain family member 4 [Source:VGNC Symbol;Acc:VGNC:58427]
ENSBTAG00000015337	219.641	1.80043	0.53189	3.38498	0.000711847	0.0403583	TSPAN12	tetraspanin 12 [Source:VGNC Symbol;Acc:VGNC:36427]
ENSBTAG00000021051	2248.93	0.578052	0.17088	3.38279	0.000717526	0.0404886	ZNHIT6	zinc finger HIT-type containing 6 [Source:VGNC Symbol;Acc:VGNC:37361]
ENSBTAG00000010581	279.992	-1.53094	0.453614	-3.37497	0.000738227	0.0411886	MAGI1	membrane associated guanylate kinase, WW and PDZ domain containing 1 [Source:VGNC Symbol;Acc:VGNC:31147]
ENSBTAG00000019434	2048.17	0.668923	0.198119	3.37636	0.000734516	0.0411886	PDCD4	programmed cell death 4 [Source:VGNC Symbol;Acc:VGNC:32661]
ENSBTAG00000026172	983.645	1.25847	0.372874	3.37507	0.000737983	0.0411886	LRATD2	LRAT domain containing 2 [Source:VGNC Symbol;Acc:VGNC:28841]
ENSBTAG00000013530	763.713	-0.883202	0.261941	-3.37177	0.000746876	0.0415157	DDAH2	dimethylarginine dimethylaminohydrolase 2 [Source:VGNC Symbol;Acc:VGNC:27940]
ENSBTAG00000017584	772.732	-1.09506	0.325094	-3.36844	0.000755959	0.0418359	PLCG1	phospholipase C gamma 1 [Source:VGNC Symbol;Acc:VGNC:32988]
ENSBTAG00000016435	1037.6	-0.805861	0.239298	-3.3676	0.000758253	0.0418359	NOM1	nucleolar protein with MIF4G domain 1 [Source:VGNC Symbol;Acc:VGNC:32162]
ENSBTAG00000020042	1236.17	0.90088	0.268044	3.36095	0.000776762	0.042699	KLHL28	kelch like family member 28 [Source:VGNC Symbol;Acc:VGNC:30655]
ENSBTAG00000002902	3546.06	1.14271	0.340303	3.35791	0.000785331	0.0430113	ANO6	anoctamin 6 [Source:VGNC Symbol;Acc:VGNC:25955]
ENSBTAG00000007659	8680.11	-0.687095	0.204835	-3.35438	0.000795434	0.0431894	CORO2A	coronin 2A [Source:VGNC Symbol;Acc:VGNC:27623]
ENSBTAG00000017218	6040.94	0.705013	0.210217	3.35374	0.00079728	0.0431894	ACER3	alkaline ceramidase 3 [Source:VGNC Symbol;Acc:VGNC:25538]
ENSBTAG00000033731	873.849	0.876252	0.26122	3.35446	0.000795187	0.0431894	PRCP	prolylcarboxypeptidase [Source:VGNC Symbol;Acc:VGNC:33287]
ENSBTAG00000050948	1747.12	-0.792772	0.23648	-3.35238	0.000801197	0.0432443	NUP62	nucleoporin 62 [Source:NCBI gene;Acc:100138517]
ENSBTAG00000006422	9528.48	-0.779393	0.232587	-3.35098	0.00080527	0.0433073	TRIM28	tripartite motif containing 28 [Source:VGNC Symbol;Acc:VGNC:36324]
ENSBTAG00000022000	26.3537	-3.0097	0.898445	-3.3499	0.000808399	0.0433192	CACNB2	calcium voltage-gated channel auxiliary subunit beta 2 [Source:VGNC Symbol;Acc:VGNC:26684]
ENSBTAG00000011932	116.191	1.19923	0.358132	3.34857	0.000812305	0.0433725	PRG4	proteoglycan 4 [Source:VGNC Symbol;Acc:VGNC:33314]
ENSBTAG00000003798	4007.44	-0.472781	0.141274	-3.34656	0.000818221	0.0433773	AMFR	autocrine motility factor receptor [Source:VGNC Symbol;Acc:VGNC:25863]
ENSBTAG00000002708	3219.6	0.541006	0.161636	3.34707	0.00081671	0.0433773	MRPL42	mitochondrial ribosomal protein L42 [Source:VGNC Symbol;Acc:VGNC:31638]
ENSBTAG00000006886	1514.77	-1.02829	0.307675	-3.34213	0.000831392	0.0437641	FAM117A	family with sequence similarity 117 member A [Source:VGNC Symbol;Acc:VGNC:28719]
ENSBTAG00000019821	5698.88	-0.892249	0.266955	-3.34232	0.000830818	0.0437641	DHX9	DExH-box helicase 9 [Source:VGNC Symbol;Acc:VGNC:28060]
ENSBTAG00000015205	1401.97	-0.938076	0.280973	-3.33867	0.000841804	0.0441159	NCK2	NCK adaptor protein 2 [Source:VGNC Symbol;Acc:VGNC:31914]
ENSBTAG00000017869	3527.53	-0.925945	0.277399	-3.33795	0.000843997	0.0441159	CAV1	caveolin 1 [Source:VGNC Symbol;Acc:VGNC:26799]
ENSBTAG00000007022	6027.39	0.795839	0.238594	3.33554	0.000851338	0.0441934	ENSBTAG00000007022
ENSBTAG00000021023	424.497	1.00922	0.302568	3.33552	0.000851414	0.0441934	ZMYM4	zinc finger MYM-type containing 4 [Source:VGNC Symbol;Acc:VGNC:37200]
ENSBTAG00000021000	246.925	-1.90599	0.571897	-3.33275	0.000859937	0.0444808	USF3	upstream transcription factor family member 3 [Source:VGNC Symbol;Acc:VGNC:53612]
ENSBTAG00000021687	294.715	-1.68756	0.506866	-3.3294	0.000870344	0.0448634	JADE2	jade family PHD finger 2 [Source:VGNC Symbol;Acc:VGNC:30359]
ENSBTAG00000002068	31279.8	0.659317	0.198099	3.32821	0.000874054	0.0448992	TAGLN2	transgelin 2 [Source:VGNC Symbol;Acc:VGNC:35586]
ENSBTAG00000054404	35.1347	-2.25578	0.679402	-3.32024	0.000899388	0.0460419	SNN	stannin [Source:NCBI gene;Acc:615361]
ENSBTAG00000024999	315.995	-1.43776	0.433569	-3.31611	0.000912787	0.0465677	ENSBTAG00000024999	undifferentiated embryonic cell transcription factor 1 [Source:NCBI gene;Acc:112444468]
ENSBTAG00000002608	10998.4	-0.316734	0.095572	-3.31409	0.000919423	0.0467462	SEPTIN2	septin 2 [Source:VGNC Symbol;Acc:VGNC:34454]
ENSBTAG00000013251	2939.69	-0.735095	0.2219	-3.31274	0.000923868	0.0468125	HDGFL2	HDGF like 2 [Source:NCBI gene;Acc:512959]
ENSBTAG00000006610	31.3775	-5.53817	1.67312	-3.31008	0.000932689	0.0470992	XRRA1	X-ray radiation resistance associated 1 [Source:VGNC Symbol;Acc:VGNC:37010]
ENSBTAG00000030567	2464.06	-0.736517	0.223312	-3.29815	0.000973253	0.0489816	ODF2	outer dense fiber of sperm tails 2 [Source:VGNC Symbol;Acc:VGNC:32401]
ENSBTAG00000016550	620.311	1.23867	0.375933	3.29492	0.00098449	0.0493803	MAEL	maelstrom spermatogenic transposon silencer [Source:VGNC Symbol;Acc:VGNC:31136]
ENSBTAG00000054392	1361.11	0.806833	0.245227	3.29015	0.00100133	0.0499325	ENSBTAG00000054392
ENSBTAG00000001895	1119.68	0.834861	0.253764	3.28991	0.0010022	0.0499325	PGGT1B	protein geranylgeranyltransferase type I subunit beta [Source:VGNC Symbol;Acc:VGNC:32788]

## Sheet: SF vs SF+PGE2 pval<0.05
GenestableID	baseMean	log2FoldChange	lfcSE	stat	pvalue	padj	Gene name	Gene description
ENSBTAG00000007136	22.509	-20.7684	2.66764	-7.78529	6.95561e-15	1.2735e-10	ADAM22	ADAM metallopeptidase domain 22 [Source:VGNC Symbol;Acc:VGNC:54401]
ENSBTAG00000053935	41.3123	-21.3008	3.53518	-6.02538	1.68709e-09	1.54445e-05	H4C7	H4C7
ENSBTAG00000005950	16.6666	7.87508	1.35357	5.81802	5.95488e-09	3.63426e-05	GPR50	G protein-coupled receptor 50 [Source:VGNC Symbol;Acc:VGNC:29589]
ENSBTAG00000004499	26.5287	8.66137	1.611	5.37638	7.59964e-08	0.000347854	RGS3	regulator of G protein signaling 3 [Source:VGNC Symbol;Acc:VGNC:33922]
ENSBTAG00000046648	46.6824	3.95598	0.85896	4.60554	4.1139e-06	0.0144736	CPA4	carboxypeptidase A4-like [Source:NCBI gene;Acc:101903427]
ENSBTAG00000000817	152.258	-1.66229	0.363275	-4.57584	4.74313e-06	0.0144736	SYNJ2	synaptojanin 2 [Source:VGNC Symbol;Acc:VGNC:35528]
ENSBTAG00000019722	36.8154	-8.44299	1.90991	-4.42063	9.84147e-06	0.0257411	GUCY2C	guanylate cyclase 2C [Source:VGNC Symbol;Acc:VGNC:29722]
ENSBTAG00000001119	37.5036	-2.99445	0.683602	-4.3804	1.18464e-05	0.0271119	ANKRD13B	ankyrin repeat domain 13B [Source:VGNC Symbol;Acc:VGNC:25913]
ENSBTAG00000021904	12.0171	-4.55756	1.11711	-4.07979	4.5076e-05	0.0916997	KIF26A	kinesin family member 26A [Source:VGNC Symbol;Acc:VGNC:53944]
ENSBTAG00000004907	273.812	-1.24839	0.308002	-4.05318	5.05264e-05	0.0925089	MINK1	misshapen like kinase 1 [Source:VGNC Symbol;Acc:VGNC:31479]
ENSBTAG00000005622	4335.48	-1.04159	0.267235	-3.89765	9.7129e-05	0.143912	LITAF	lipopolysaccharide induced TNF factor [Source:VGNC Symbol;Acc:VGNC:30911]
ENSBTAG00000055296	176.425	-1.32628	0.341094	-3.88831	0.000100945	0.143912	LGALSL	galectin like [Source:NCBI gene;Acc:516629]
ENSBTAG00000011121	84.8606	-3.94736	1.0207	-3.86731	0.000110042	0.143912	CLCN4	chloride voltage-gated channel 4 [Source:VGNC Symbol;Acc:VGNC:27398]
ENSBTAG00000030259	46.4645	-4.00311	1.03415	-3.87093	0.00010842	0.143912	RASGRF2	Ras protein specific guanine nucleotide releasing factor 2 [Source:VGNC Symbol;Acc:VGNC:33746]
ENSBTAG00000008755	3177.54	-0.53419	0.141388	-3.7782	0.000157966	0.152988	MARCHF7	membrane associated ring-CH-type finger 7 [Source:VGNC Symbol;Acc:VGNC:31242]
ENSBTAG00000021822	236.369	-1.06905	0.281085	-3.8033	0.000142781	0.152988	ARV1	ARV1 homolog, fatty acid homeostasis modulator [Source:VGNC Symbol;Acc:VGNC:26182]
ENSBTAG00000015924	726.108	-1.8365	0.487892	-3.76415	0.000167118	0.152988	CALB1	calbindin 1 [Source:VGNC Symbol;Acc:VGNC:26700]
ENSBTAG00000033137	94.3409	-2.96086	0.781279	-3.78976	0.000150795	0.152988	PSD3	pleckstrin and Sec7 domain containing 3 [Source:VGNC Symbol;Acc:VGNC:57317]
ENSBTAG00000019417	84.5998	-3.01424	0.799867	-3.76843	0.000164278	0.152988	ARMCX2	armadillo repeat containing X-linked 2 [Source:VGNC Symbol;Acc:VGNC:50545]
ENSBTAG00000014135	34.4813	-6.52833	1.70465	-3.82972	0.00012829	0.152988	WDR17	WD repeat domain 17 [Source:VGNC Symbol;Acc:VGNC:36884]
ENSBTAG00000008371	1062.02	-0.907046	0.246236	-3.68364	0.000229924	0.191349	FBXL20	F-box and leucine rich repeat protein 20 [Source:VGNC Symbol;Acc:VGNC:52776]
ENSBTAG00000003405	325.886	-1.35345	0.367201	-3.68586	0.000227935	0.191349	TP53I3	tumor protein p53 inducible protein 3 [Source:VGNC Symbol;Acc:VGNC:36235]
ENSBTAG00000010221	1744.15	-0.733349	0.201004	-3.64844	0.000263839	0.202609	CCDC93	coiled-coil domain containing 93 [Source:VGNC Symbol;Acc:VGNC:26934]
ENSBTAG00000035710	16.4952	-6.33003	1.7358	-3.64674	0.000265586	0.202609	ZBBX	zinc finger B-box domain containing [Source:VGNC Symbol;Acc:VGNC:53614]
ENSBTAG00000008126	16.2042	5.38586	1.4831	3.63149	0.000281793	0.204444	NPHP4	nephrocystin 4 [Source:VGNC Symbol;Acc:VGNC:32203]
ENSBTAG00000025756	2541.88	0.538869	0.149056	3.61522	0.000300098	0.204444	FBXW12	F-box and WD repeat domain containing 12 [Source:NCBI gene;Acc:528919]
ENSBTAG00000044053	566.079	-1.05166	0.290996	-3.61402	0.000301491	0.204444	SLC17A5	solute carrier family 17 member 5 [Source:VGNC Symbol;Acc:VGNC:34700]
ENSBTAG00000020341	31.415	4.02172	1.11822	3.59654	0.000322476	0.210865	MOV10L1	Mov10 like RISC complex RNA helicase 1 [Source:VGNC Symbol;Acc:VGNC:31567]
ENSBTAG00000016529	1120.22	-1.20134	0.334921	-3.58693	0.000334599	0.211247	SLC25A30	solute carrier family 25 member 30 [Source:VGNC Symbol;Acc:VGNC:34756]
ENSBTAG00000021651	17963.9	0.394533	0.110369	3.57466	0.000350677	0.214018	UQCRC2	ubiquinol-cytochrome c reductase core protein 2 [Source:VGNC Symbol;Acc:VGNC:36696]
ENSBTAG00000050733	83.0013	1.72712	0.485269	3.5591	0.000372125	0.217533	ATP6AP1L	ATPase H+ transporting accessory protein 1 like [Source:NCBI gene;Acc:510390]
ENSBTAG00000004695	8840.39	0.311068	0.0875394	3.55346	0.000380198	0.217533	CDK9	cyclin dependent kinase 9 [Source:VGNC Symbol;Acc:VGNC:27136]
ENSBTAG00000018660	142.139	1.30963	0.370846	3.53147	0.000413252	0.222536	PPP6R2	protein phosphatase 6 regulatory subunit 2 [Source:VGNC Symbol;Acc:VGNC:33274]
ENSBTAG00000012519	518.297	1.06709	0.30192	3.53436	0.000408766	0.222536	XDH	xanthine dehydrogenase [Source:VGNC Symbol;Acc:VGNC:36984]
ENSBTAG00000001133	747.848	-0.877872	0.249211	-3.52261	0.000427316	0.223535	VWA8	von Willebrand factor A domain containing 8 [Source:VGNC Symbol;Acc:VGNC:36856]
ENSBTAG00000001652	24.7942	-7.63899	2.18212	-3.50073	0.000463993	0.235979	SLCO3A1	solute carrier organic anion transporter family member 3A1 [Source:VGNC Symbol;Acc:VGNC:34953]
ENSBTAG00000014026	29.0382	-4.48602	1.28461	-3.49213	0.000479183	0.237118	PAG1	phosphoprotein membrane anchor with glycosphingolipid microdomains 1 [Source:VGNC Symbol;Acc:VGNC:32553]
ENSBTAG00000021048	193.254	-1.50042	0.430794	-3.48292	0.000495972	0.238967	ADM	adrenomedullin [Source:VGNC Symbol;Acc:VGNC:25681]
ENSBTAG00000011798	186.896	-1.94342	0.559612	-3.4728	0.000515051	0.241797	STK38L	serine/threonine kinase 38 like [Source:VGNC Symbol;Acc:VGNC:35400]
ENSBTAG00000016869	2711.08	0.535405	0.154638	3.4623	0.000535581	0.245149	POLD3	DNA polymerase delta 3, accessory subunit [Source:VGNC Symbol;Acc:VGNC:33115]
ENSBTAG00000000157	193.019	1.38062	0.401252	3.44078	0.00058004	0.251673	CCDC138	coiled-coil domain containing 138 [Source:VGNC Symbol;Acc:VGNC:26850]
ENSBTAG00000021373	1040.91	0.686442	0.199429	3.44203	0.000577367	0.251673	GTF3C5	general transcription factor IIIC subunit 5 [Source:VGNC Symbol;Acc:VGNC:29706]
ENSBTAG00000017166	514.241	-2.44497	0.71164	-3.43568	0.000591073	0.251673	C9H6orf58	chromosome 9 C6orf58 homolog [Source:VGNC Symbol;Acc:VGNC:53784]
ENSBTAG00000043990	10.01	4.24055	1.23998	3.41984	0.000626569	0.260724	KHDRBS2	KH RNA binding domain containing, signal transduction associated 2 [Source:VGNC Symbol;Acc:VGNC:30541]
ENSBTAG00000013366	41.1732	4.67843	1.37695	3.39768	0.000679593	0.275922	NRIP3	nuclear receptor interacting protein 3 [Source:VGNC Symbol;Acc:VGNC:32264]
ENSBTAG00000014074	751.852	-0.609366	0.179635	-3.39224	0.000693233	0.275922	SNX13	sorting nexin 13 [Source:NCBI gene;Acc:532001]
ENSBTAG00000018941	33.007	-7.43791	2.19732	-3.38499	0.00071181	0.277288	CPXM2	carboxypeptidase X, M14 family member 2 [Source:VGNC Symbol;Acc:VGNC:27682]
ENSBTAG00000014612	21.3716	8.16819	2.43046	3.36076	0.000777271	0.293075	DOCK2	dedicator of cytokinesis 2 [Source:VGNC Symbol;Acc:VGNC:28157]
ENSBTAG00000010715	10723.6	0.3174	0.0948714	3.34558	0.000821114	0.293075	MRPL37	mitochondrial ribosomal protein L37 [Source:VGNC Symbol;Acc:VGNC:59185]
ENSBTAG00000001332	674.458	-1.01297	0.302854	-3.34476	0.000823544	0.293075	MYO1C	myosin IC [Source:VGNC Symbol;Acc:VGNC:31818]
ENSBTAG00000020196	268.358	-3.10696	0.929726	-3.3418	0.000832372	0.293075	ENPP3	ectonucleotide pyrophosphatase/phosphodiesterase 3 [Source:VGNC Symbol;Acc:VGNC:28506]
ENSBTAG00000004863	34.25	-3.58415	1.0706	-3.34779	0.000814589	0.293075	RIC3	RIC3 acetylcholine receptor chaperone [Source:VGNC Symbol;Acc:VGNC:33960]
ENSBTAG00000006064	47.516	-3.32378	1.00476	-3.30803	0.000939532	0.324564	C7H19orf57	chromosome 7 C19orf57 homolog [Source:VGNC Symbol;Acc:VGNC:52729]
ENSBTAG00000002848	320.266	1.02365	0.310994	3.29154	0.000996417	0.325775	C16H1orf74	chromosome 16 C1orf74 homolog [Source:VGNC Symbol;Acc:VGNC:52644]
ENSBTAG00000008845	1662.02	0.514951	0.156024	3.30045	0.000965285	0.325775	INTS9	integrator complex subunit 9 [Source:VGNC Symbol;Acc:VGNC:30234]
ENSBTAG00000000184	702.818	-1.01476	0.30805	-3.29412	0.000987288	0.325775	EIF2AK3	eukaryotic translation initiation factor 2 alpha kinase 3 [Source:VGNC Symbol;Acc:VGNC:28382]
ENSBTAG00000054245	15.6056	-3.76796	1.15223	-3.27014	0.00107495	0.345286	CD163L1	CD163 molecule-like 1 [Source:NCBI gene;Acc:338056]
ENSBTAG00000004869	1693.16	-0.639269	0.196648	-3.25084	0.00115066	0.363232	CXADR	CXADR Ig-like cell adhesion molecule [Source:VGNC Symbol;Acc:VGNC:53521]
ENSBTAG00000013651	1303.64	0.550112	0.169577	3.24403	0.00117852	0.365721	DNAJB12	DnaJ heat shock protein family (Hsp40) member B12 [Source:VGNC Symbol;Acc:VGNC:55983]
ENSBTAG00000025182	58.6001	-2.01871	0.623559	-3.2374	0.00120624	0.368085	FBXL21	F-box and leucine rich repeat protein 21 [Source:NCBI gene;Acc:505624]
ENSBTAG00000013315	197382	0.292976	0.0908876	3.22349	0.00126637	0.373967	ATP5F1B	ATP synthase F1 subunit beta [Source:VGNC Symbol;Acc:VGNC:26300]
ENSBTAG00000046346	74.3538	-1.73476	0.538099	-3.22386	0.00126476	0.373967	PACS2	phosphofurin acidic cluster sorting protein 2 [Source:VGNC Symbol;Acc:VGNC:53946]
ENSBTAG00000015419	7.37825	6.30728	1.97804	3.18865	0.00142941	0.402631	ARHGEF37	Rho guanine nucleotide exchange factor 37 [Source:VGNC Symbol;Acc:VGNC:26116]
ENSBTAG00000002643	1153.3	0.673598	0.211204	3.18932	0.00142608	0.402631	VPS52	VPS52 subunit of GARP complex [Source:VGNC Symbol;Acc:VGNC:36828]
ENSBTAG00000045581	638.463	-1.12585	0.352422	-3.19462	0.00140016	0.402631
ENSBTAG00000007330	1016.66	-0.616408	0.195012	-3.16087	0.001573	0.436363	STXBP3	syntaxin binding protein 3 [Source:VGNC Symbol;Acc:VGNC:35447]
ENSBTAG00000014645	24.4619	-4.99465	1.5839	-3.15338	0.00161393	0.441036	CNTN2	contactin 2 [Source:VGNC Symbol;Acc:VGNC:27537]
ENSBTAG00000014186	843.648	0.515724	0.164629	3.13264	0.0017324	0.453122	NCOA5	nuclear receptor coactivator 5 [Source:VGNC Symbol;Acc:VGNC:31923]
ENSBTAG00000001752	493.832	-1.00973	0.321933	-3.13645	0.00171005	0.453122	FUCA2	alpha-L-fucosidase 2 [Source:VGNC Symbol;Acc:VGNC:29141]
ENSBTAG00000030824	19.7519	-3.96601	1.26347	-3.13898	0.00169537	0.453122	L3HYPDH	trans-L-3-hydroxyproline dehydratase [Source:VGNC Symbol;Acc:VGNC:30762]
ENSBTAG00000020544	2190.83	0.388384	0.124338	3.12362	0.00178641	0.460359	BCL7B	BAF chromatin remodeling complex subunit BCL7B [Source:VGNC Symbol;Acc:VGNC:26450]
ENSBTAG00000007578	129.441	-1.13676	0.364382	-3.1197	0.00181036	0.460359	SHTN1	shootin 1 [Source:VGNC Symbol;Acc:VGNC:34611]
ENSBTAG00000004854	17.9619	-2.50529	0.804142	-3.11548	0.00183647	0.460602	SLC24A5	solute carrier family 24 member 5 [Source:VGNC Symbol;Acc:VGNC:34740]
ENSBTAG00000004871	8341.43	0.325737	0.104915	3.10477	0.00190424	0.471146	NDUFV2	NADH:ubiquinone oxidoreductase core subunit V2 [Source:VGNC Symbol;Acc:VGNC:31975]
ENSBTAG00000026242	42.6087	-2.84664	0.918861	-3.098	0.00194828	0.475615	BAALC	BAALC binder of MAP3K1 and KLF4 [Source:VGNC Symbol;Acc:VGNC:26398]
ENSBTAG00000002469	16.611	3.53206	1.14276	3.09082	0.00199603	0.480859	KANK3	KN motif and ankyrin repeat domains 3 [Source:VGNC Symbol;Acc:VGNC:30391]
ENSBTAG00000004464	121.338	1.11462	0.361959	3.07941	0.00207409	0.486853	HROB	homologous recombincation factor with OB-fold [Source:VGNC Symbol;Acc:VGNC:52654]
ENSBTAG00000019855	28.3681	-3.87316	1.25645	-3.08263	0.00205183	0.486853	MAP3K15	mitogen-activated protein kinase kinase kinase 15 [Source:VGNC Symbol;Acc:VGNC:31193]
ENSBTAG00000014020	14.4356	-6.90097	2.24441	-3.07473	0.0021069	0.488294	RTKN2	rhotekin 2 [Source:VGNC Symbol;Acc:VGNC:34198]
ENSBTAG00000007530	16.1996	7.74292	2.54909	3.03753	0.00238528	0.488577	TRIM10	tripartite motif containing 10 [Source:VGNC Symbol;Acc:VGNC:36312]
ENSBTAG00000031059	183.829	1.04849	0.34374	3.05024	0.00228655	0.488577	LRRC61	leucine rich repeat containing 61 [Source:NCBI gene;Acc:616659]
ENSBTAG00000016387	1685.61	0.638292	0.210509	3.03213	0.00242834	0.488577	GDAP2	ganglioside induced differentiation associated protein 2 [Source:VGNC Symbol;Acc:VGNC:29297]
ENSBTAG00000021519	5729.33	0.425669	0.139322	3.05528	0.00224851	0.488577	CAMLG	calcium modulating ligand [Source:VGNC Symbol;Acc:VGNC:26729]
ENSBTAG00000019984	19481	0.422396	0.138424	3.05147	0.00227724	0.488577	GINS1	GINS complex subunit 1 [Source:VGNC Symbol;Acc:VGNC:29360]
ENSBTAG00000001673	1901.83	-0.640551	0.211078	-3.03467	0.00240798	0.488577	C2CD5	C2 calcium dependent domain containing 5 [Source:VGNC Symbol;Acc:VGNC:26636]
ENSBTAG00000003256	374.812	-0.647263	0.211468	-3.06081	0.00220738	0.488577	TOMM34	translocase of outer mitochondrial membrane 34 [Source:VGNC Symbol;Acc:VGNC:49135]
ENSBTAG00000043999	598.487	-0.720346	0.23632	-3.04818	0.00230232	0.488577	REV1	REV1 DNA directed polymerase [Source:VGNC Symbol;Acc:VGNC:33882]
ENSBTAG00000007306	56.4081	-2.42222	0.798426	-3.03375	0.00241537	0.488577	RAB3C	RAB3C, member RAS oncogene family [Source:VGNC Symbol;Acc:VGNC:33651]
ENSBTAG00000021252	63.5395	-3.78692	1.24317	-3.04619	0.00231762	0.488577	TMEM35A	transmembrane protein 35A [Source:VGNC Symbol;Acc:VGNC:36077]
ENSBTAG00000011310	8.87652	-6.15744	2.01869	-3.05022	0.00228671	0.488577	FAM155B	family with sequence similarity 155 member B [Source:VGNC Symbol;Acc:VGNC:28736]
ENSBTAG00000002788	11.3455	-6.8496	2.24907	-3.04553	0.00232274	0.488577	RAB27B	RAB27B, member RAS oncogene family [Source:VGNC Symbol;Acc:VGNC:33634]
ENSBTAG00000003232	268.314	-1.05414	0.349442	-3.01663	0.00255602	0.508676	RAB29	RAB29, member RAS oncogene family [Source:VGNC Symbol;Acc:VGNC:33636]
ENSBTAG00000019726	13.9364	7.56849	2.5236	2.99909	0.00270791	0.523614	ANKEF1	ankyrin repeat and EF-hand domain containing 1 [Source:VGNC Symbol;Acc:VGNC:25899]
ENSBTAG00000037393	495.203	0.807932	0.270093	2.99131	0.00277786	0.523614	ZNF639	zinc finger protein 639 [Source:VGNC Symbol;Acc:VGNC:52853]
ENSBTAG00000008361	1007.4	0.603859	0.201319	2.99951	0.00270415	0.523614	PON2	paraoxonase 2 [Source:VGNC Symbol;Acc:VGNC:33161]
ENSBTAG00000020829	1934.85	-0.758054	0.253649	-2.98859	0.00280267	0.523614	PTPRK	protein tyrosine phosphatase receptor type K [Source:VGNC Symbol;Acc:VGNC:33552]
ENSBTAG00000013298	524.684	-1.21154	0.40488	-2.99234	0.00276851	0.523614	PLA2G4A	phospholipase A2 group IVA [Source:VGNC Symbol;Acc:VGNC:32960]
ENSBTAG00000004405	18.4828	-3.13698	1.04767	-2.99425	0.00275124	0.523614	IQUB	IQ motif and ubiquitin domain containing [Source:VGNC Symbol;Acc:VGNC:30263]
ENSBTAG00000031402	1225.07	0.606976	0.204023	2.97503	0.00292959	0.525862	ASXL1	ASXL transcriptional regulator 1 [Source:VGNC Symbol;Acc:VGNC:26228]
ENSBTAG00000000218	509.139	-0.598126	0.200581	-2.98197	0.00286401	0.525862	MAP2K5	mitogen-activated protein kinase kinase 5 [Source:VGNC Symbol;Acc:VGNC:31186]
ENSBTAG00000020671	526.817	-0.804803	0.270254	-2.97796	0.00290177	0.525862	TRIM62	tripartite motif containing 62 [Source:VGNC Symbol;Acc:VGNC:36345]
ENSBTAG00000021778	42.5693	-2.30064	0.772262	-2.97909	0.00289108	0.525862	SELENON	selenoprotein N [Source:VGNC Symbol;Acc:VGNC:56142]
ENSBTAG00000046588	2072.84	-0.821225	0.276319	-2.97201	0.00295854	0.525902	DNAJB9	DnaJ heat shock protein family (Hsp40) member B9 [Source:NCBI gene;Acc:614588]
ENSBTAG00000014665	13.6239	6.80728	2.30224	2.95681	0.00310842	0.526114	ADAMTS2	ADAM metallopeptidase with thrombospondin type 1 motif 2 [Source:VGNC Symbol;Acc:VGNC:25624]
ENSBTAG00000044146	31.0499	4.35589	1.47208	2.959	0.00308639	0.526114	NPC1L1	NPC1 like intracellular cholesterol transporter 1 [Source:VGNC Symbol;Acc:VGNC:32195]
ENSBTAG00000012208	156.978	1.60934	0.543869	2.95905	0.00308586	0.526114		MHC class I heavy chain [Source:NCBI gene;Acc:507917]
ENSBTAG00000037383	2695.79	-0.685912	0.232604	-2.94885	0.00318962	0.526114	AKAP13	A-kinase anchoring protein 13 [Source:NCBI gene;Acc:504288]
ENSBTAG00000019107	903.652	-0.714415	0.241161	-2.9624	0.00305256	0.526114	GAS7	growth arrest specific 7 [Source:VGNC Symbol;Acc:VGNC:29262]
ENSBTAG00000000414	140.799	-3.65332	1.23788	-2.95128	0.00316459	0.526114	FUT6	fucosyltransferase 6 [Source:NCBI gene;Acc:338077]
ENSBTAG00000021302	4.98156	-6.11327	2.07259	-2.94959	0.003182	0.526114	CHAD	chondroadherin [Source:VGNC Symbol;Acc:VGNC:27264]
ENSBTAG00000049604	9.10143	-6.715	2.26351	-2.96664	0.00301076	0.526114
ENSBTAG00000038652	90.7175	0.954828	0.324118	2.94593	0.00321986	0.52636		apolipoprotein L, 3-like [Source:NCBI gene;Acc:510193]
ENSBTAG00000000105	1521.72	-1.07128	0.364616	-2.93809	0.00330236	0.533035	RIT1	Ras like without CAAX 1 [Source:VGNC Symbol;Acc:VGNC:33987]
ENSBTAG00000012297	86.0045	-1.94636	0.662806	-2.93654	0.00331891	0.533035	RIPOR3	RIPOR family member 3 [Source:VGNC Symbol;Acc:VGNC:33984]
ENSBTAG00000019093	24.2425	-5.09372	1.73623	-2.93379	0.00334853	0.533115	AMY2B	amylase, alpha 2B (pancreatic) [Source:NCBI gene;Acc:505049]
ENSBTAG00000019788	1686.06	0.454075	0.155139	2.9269	0.00342358	0.540365	TEAD4	TEA domain transcription factor 4 [Source:VGNC Symbol;Acc:VGNC:35727]
ENSBTAG00000016239	123.014	1.58596	0.542856	2.9215	0.00348347	0.545118	DUOXA2	dual oxidase maturation factor 2 [Source:VGNC Symbol;Acc:VGNC:28244]
ENSBTAG00000007807	4464.41	0.58488	0.200912	2.91113	0.00360124	0.554889	HSPA2	heat shock protein family A (Hsp70) member 2 [Source:NCBI gene;Acc:281827]
ENSBTAG00000012794	16.3158	-6.73791	2.3149	-2.91067	0.00360652	0.554889	PAH	phenylalanine hydroxylase [Source:VGNC Symbol;Acc:VGNC:32554]
ENSBTAG00000001144	4073.17	0.421673	0.145272	2.90264	0.00370031	0.564575	NAA20	N(alpha)-acetyltransferase 20, NatB catalytic subunit [Source:VGNC Symbol;Acc:VGNC:57011]
ENSBTAG00000030502	13.4922	5.64271	1.94947	2.89449	0.00379774	0.5692		orphan sodium- and chloride-dependent neurotransmitter transporter NTT5 [Source:NCBI gene;Acc:785933]
ENSBTAG00000002069	909.195	1.20592	0.417453	2.88875	0.00386771	0.5692	BOLA	MHC class I heavy chain [Source:NCBI gene;Acc:515712]
ENSBTAG00000009488	3783.96	0.47336	0.16373	2.89109	0.00383906	0.5692	NXF1	nuclear RNA export factor 1 [Source:VGNC Symbol;Acc:VGNC:32375]
ENSBTAG00000054647	1760.35	0.437717	0.151735	2.88476	0.00391716	0.5692	RPE	ribulose-5-phosphate-3-epimerase [Source:NCBI gene;Acc:533764]
ENSBTAG00000012890	45727.3	0.212431	0.0734901	2.8906	0.00384502	0.5692	SLC25A3	solute carrier family 25 member 3 [Source:VGNC Symbol;Acc:VGNC:49965]
ENSBTAG00000009477	51.985	-1.48695	0.515101	-2.88671	0.00389293	0.5692	PIR	pirin [Source:VGNC Symbol;Acc:VGNC:32915]
ENSBTAG00000023947	534.533	0.674698	0.234665	2.87515	0.00403836	0.579865	AVPI1	arginine vasopressin induced 1 [Source:VGNC Symbol;Acc:VGNC:26357]
ENSBTAG00000006492	552.942	-0.698115	0.242912	-2.87394	0.00405389	0.579865	PI4K2B	phosphatidylinositol 4-kinase type 2 beta [Source:NCBI gene;Acc:521790]
ENSBTAG00000003923	163.967	-1.03178	0.359358	-2.87118	0.00408937	0.580405	GPBAR1	G protein-coupled bile acid receptor 1 [Source:VGNC Symbol;Acc:VGNC:29521]
ENSBTAG00000012275	687.652	0.999761	0.348587	2.86804	0.00413024	0.581697	ENDOU	endonuclease, poly(U) specific [Source:NCBI gene;Acc:525399]
ENSBTAG00000003865	30.2939	5.90182	2.06357	2.86	0.00423645	0.588985	CASR	calcium sensing receptor [Source:VGNC Symbol;Acc:VGNC:26788]
ENSBTAG00000038258	1716.52	1.05328	0.368525	2.85809	0.004262	0.588985		tubulin alpha-3 chain [Source:NCBI gene;Acc:100295712]
ENSBTAG00000005810	747.83	-1.19154	0.417079	-2.85686	0.00427849	0.588985	PDZK1	PDZ domain containing 1 [Source:VGNC Symbol;Acc:VGNC:55652]
ENSBTAG00000020331	3397.87	0.411918	0.144757	2.84559	0.0044329	0.605687	COQ6	coenzyme Q6, monooxygenase [Source:VGNC Symbol;Acc:VGNC:27614]
ENSBTAG00000001139	8.15418	-6.66529	2.34953	-2.83685	0.00455604	0.6179	ACHE	acetylcholinesterase (Cartwright blood group) [Source:NCBI gene;Acc:540446]
ENSBTAG00000054698	12.9961	-2.38874	0.843088	-2.83332	0.00460676	0.620185
ENSBTAG00000049233	1125.53	-0.729011	0.258116	-2.82436	0.00473757	0.63314		transmembrane protein 123 [Source:NCBI gene;Acc:100300021]
ENSBTAG00000011713	6.99933	-5.68204	2.01414	-2.82108	0.00478623	0.635007
ENSBTAG00000008993	14.2991	2.63975	0.937474	2.81581	0.00486548	0.640878	INTS6L	integrator complex subunit 6-like [Source:NCBI gene;Acc:540312]
ENSBTAG00000002878	46.0869	1.74456	0.620692	2.81066	0.00494396	0.641483	CHRD	chordin [Source:VGNC Symbol;Acc:VGNC:27316]
ENSBTAG00000003465	921.829	0.598004	0.213003	2.8075	0.00499282	0.641483	ZNF329	zinc finger protein 329 [Source:VGNC Symbol;Acc:VGNC:53038]
ENSBTAG00000049518	9.18726	-6.42862	2.28724	-2.81065	0.00494418	0.641483
ENSBTAG00000026139	14.5313	-7.41317	2.64154	-2.80638	0.00501022	0.641483	ARMCX1	armadillo repeat containing X-linked 1 [Source:VGNC Symbol;Acc:VGNC:50546]
ENSBTAG00000033886	385.774	0.959885	0.34235	2.80381	0.00505022	0.642115	CIST1	intestine-specific transcript 1 protein [Source:NCBI gene;Acc:506589]
ENSBTAG00000016933	16.8944	7.38699	2.64518	2.79263	0.00522815	0.644981	IL27RA	interleukin 27 receptor subunit alpha [Source:VGNC Symbol;Acc:VGNC:30151]
ENSBTAG00000052146	57.3358	-1.13526	0.4057	-2.79828	0.00513752	0.644981	MSANTD3	Myb/SANT DNA binding domain containing 3 [Source:NCBI gene;Acc:534309]
ENSBTAG00000020766	40.0276	-3.37802	1.20972	-2.79239	0.00523201	0.644981	ABCA7	ATP binding cassette subfamily A member 7 [Source:VGNC Symbol;Acc:VGNC:25461]
ENSBTAG00000004813	30.1455	-4.89385	1.75322	-2.79135	0.0052489	0.644981	SUSD1	sushi domain containing 1 [Source:VGNC Symbol;Acc:VGNC:35486]
ENSBTAG00000031697	26.1774	-4.98255	1.7814	-2.79699	0.0051581	0.644981	KLHDC1	kelch domain containing 1 [Source:VGNC Symbol;Acc:VGNC:30633]
ENSBTAG00000011209	23.9004	2.49759	0.900726	2.77286	0.00555658	0.646137	SYT11	synaptotagmin 11 [Source:VGNC Symbol;Acc:VGNC:35537]
ENSBTAG00000020116	975.47	1.33279	0.479975	2.77679	0.00548979	0.646137	JSP.1	Bos taurus uncharacterized protein 100125016 (LOC100125916), mRNA. [Source:RefSeq mRNA;Acc:NM_001105487]
ENSBTAG00000016332	218.857	1.01132	0.364357	2.77564	0.00550933	0.646137	ING3	inhibitor of growth family member 3 [Source:VGNC Symbol;Acc:VGNC:30196]
ENSBTAG00000000742	769.28	1.00219	0.36211	2.76763	0.00564651	0.646137	AMOTL2	angiomotin like 2 [Source:VGNC Symbol;Acc:VGNC:25872]
ENSBTAG00000006288	510.25	0.946704	0.34132	2.77366	0.00554296	0.646137	VSTM4	V-set and transmembrane domain containing 4 [Source:VGNC Symbol;Acc:VGNC:54511]
ENSBTAG00000014215	2309.04	0.538434	0.193557	2.78178	0.00540617	0.646137	CCDC86	coiled-coil domain containing 86 [Source:NCBI gene;Acc:540913]
ENSBTAG00000011514	3511.95	0.503807	0.181981	2.76847	0.0056321	0.646137	MRPL44	mitochondrial ribosomal protein L44 [Source:VGNC Symbol;Acc:VGNC:31639]
ENSBTAG00000016648	119550	0.321157	0.11544	2.78202	0.00540212	0.646137	BSG	basigin [Source:VGNC Symbol;Acc:VGNC:52220]
ENSBTAG00000011068	502.57	-1.24181	0.447246	-2.77657	0.0054936	0.646137	MON2	MON2 homolog, regulator of endosome-to-Golgi trafficking [Source:VGNC Symbol;Acc:VGNC:31553]
ENSBTAG00000011956	21.0516	-2.71913	0.977559	-2.78155	0.00540997	0.646137	CNNM1	cyclin and CBS domain divalent metal cation transport mediator 1 [Source:VGNC Symbol;Acc:VGNC:27510]
ENSBTAG00000010082	102.766	-3.4565	1.24769	-2.77033	0.00560002	0.646137	COL15A1	collagen type XV alpha 1 chain [Source:VGNC Symbol;Acc:VGNC:27556]
ENSBTAG00000007797	2407.22	-0.614953	0.222381	-2.76531	0.0056869	0.646717	IGBP1	immunoglobulin binding protein 1 [Source:NCBI gene;Acc:100296883]
ENSBTAG00000004294	178.311	-1.11792	0.405909	-2.75411	0.00588521	0.661057	EVI5L	ecotropic viral integration site 5 like [Source:VGNC Symbol;Acc:VGNC:54622]
ENSBTAG00000026966	15.6838	-6.698	2.43159	-2.75457	0.00587685	0.661057	RASSF9	Ras association domain family member 9 [Source:VGNC Symbol;Acc:VGNC:33765]
ENSBTAG00000010734	4730.98	0.345004	0.125361	2.75209	0.00592158	0.661087	NOP16	NOP16 nucleolar protein [Source:VGNC Symbol;Acc:VGNC:32166]
ENSBTAG00000011154	778.769	-0.759059	0.276176	-2.74846	0.0059876	0.664406	SDC1	syndecan 1 [Source:VGNC Symbol;Acc:VGNC:34378]
ENSBTAG00000045966	20.7486	7.52026	2.75166	2.73299	0.00627627	0.66441	GPRIN3	GPRIN family member 3 [Source:VGNC Symbol;Acc:VGNC:29611]
ENSBTAG00000009837	9.97348	7.25206	2.64392	2.74292	0.00608948	0.66441	ANKS4B	ankyrin repeat and sterile alpha motif domain containing 4B [Source:VGNC Symbol;Acc:VGNC:25946]
ENSBTAG00000008201	41.1931	2.13902	0.781281	2.73784	0.00618445	0.66441	CCDC151	coiled-coil domain containing 151 [Source:VGNC Symbol;Acc:VGNC:26856]
ENSBTAG00000005182	499.104	0.920489	0.336178	2.7381	0.00617952	0.66441	BoLA	Bos taurus major histocompatibility complex, class I, A (BOLA-A), mRNA. [Source:RefSeq mRNA;Acc:NM_001040554]
ENSBTAG00000008150	2474.79	-0.787366	0.287559	-2.73811	0.00617943	0.66441	PKIA	cAMP-dependent protein kinase inhibitor alpha [Source:VGNC Symbol;Acc:VGNC:32940]
ENSBTAG00000010482	528.478	-0.910657	0.333913	-2.72723	0.00638681	0.66441	PITPNM1	phosphatidylinositol transfer protein membrane associated 1 [Source:VGNC Symbol;Acc:VGNC:32921]
ENSBTAG00000009984	1373.42	-1.0396	0.380593	-2.73151	0.00630441	0.66441	SGPL1	sphingosine-1-phosphate lyase 1 [Source:VGNC Symbol;Acc:VGNC:34547]
ENSBTAG00000054059	91.4198	-1.20704	0.441768	-2.73228	0.00628972	0.66441	MYCL	MYCL proto-oncogene, bHLH transcription factor [Source:NCBI gene;Acc:540350]
ENSBTAG00000020999	92.6272	-1.32278	0.484191	-2.73193	0.00629639	0.66441	DDB2	damage specific DNA binding protein 2 [Source:VGNC Symbol;Acc:VGNC:27942]
ENSBTAG00000000576	276.735	-1.54173	0.564948	-2.72897	0.00635332	0.66441	ADGRG2	adhesion G protein-coupled receptor G2 [Source:VGNC Symbol;Acc:VGNC:25666]
ENSBTAG00000047103	63.5208	-1.97917	0.724784	-2.7307	0.00631998	0.66441	IDNK	IDNK gluconokinase [Source:VGNC Symbol;Acc:VGNC:30034]
ENSBTAG00000007952	3098.7	0.700819	0.257839	2.71805	0.00656672	0.671676	MVP	major vault protein [Source:VGNC Symbol;Acc:VGNC:31769]
ENSBTAG00000014367	555.414	-0.547334	0.201202	-2.72032	0.00652178	0.671676		protein kinase X-linked [Source:NCBI gene;Acc:505773]
ENSBTAG00000009703	127.874	-1.11475	0.410052	-2.71857	0.00655651	0.671676	MYH7	myosin heavy chain 7 [Source:NCBI gene;Acc:282714]
ENSBTAG00000004997	3086.67	-0.445571	0.164178	-2.71395	0.00664871	0.672548	CTNNAL1	catenin alpha like 1 [Source:VGNC Symbol;Acc:VGNC:27801]
ENSBTAG00000030247	487.201	-0.639736	0.235624	-2.71507	0.00662617	0.672548	NSMF	NMDA receptor synaptonuclear signaling and neuronal migration factor [Source:VGNC Symbol;Acc:VGNC:32283]
ENSBTAG00000012141	1317.99	0.471431	0.174375	2.70355	0.0068603	0.690138	RAD9A	RAD9 checkpoint clamp component A [Source:VGNC Symbol;Acc:VGNC:33689]
ENSBTAG00000014655	29.7015	4.86682	1.80381	2.69807	0.00697426	0.691389	MYO1A	myosin IA [Source:VGNC Symbol;Acc:VGNC:31816]
ENSBTAG00000008533	55.2909	1.65128	0.611871	2.69875	0.00696014	0.691389	GLCCI1	glucocorticoid induced 1 [Source:VGNC Symbol;Acc:VGNC:29393]
ENSBTAG00000046160	893.736	-0.729386	0.270392	-2.69751	0.00698602	0.691389	SMIM13	small integral membrane protein 13 [Source:VGNC Symbol;Acc:VGNC:35015]
ENSBTAG00000017098	293.321	1.15007	0.426763	2.69488	0.00704148	0.692488	BPIFA1	BPI fold containing family A member 1 [Source:VGNC Symbol;Acc:VGNC:26543]
ENSBTAG00000012109	759.249	0.69968	0.260111	2.68992	0.00714687	0.692488	EDN3	endothelin 3 [Source:VGNC Symbol;Acc:VGNC:56185]
ENSBTAG00000005260	400.424	-2.0302	0.754762	-2.68985	0.00714841	0.692488	SPP1	secreted phosphoprotein 1 [Source:VGNC Symbol;Acc:VGNC:35232]
ENSBTAG00000032503	12.5302	-7.35736	2.73299	-2.69206	0.00710124	0.692488	ITPRIPL2	ITPRIP like 2 [Source:VGNC Symbol;Acc:VGNC:30351]
ENSBTAG00000009097	1706.87	0.516358	0.192245	2.68593	0.00723281	0.696977	FANCI	FA complementation group I [Source:VGNC Symbol;Acc:VGNC:28859]
ENSBTAG00000010934	8900.6	0.240853	0.0897665	2.68311	0.00729411	0.699203	RAE1	ribonucleic acid export 1 [Source:VGNC Symbol;Acc:VGNC:33692]
ENSBTAG00000000495	49.9576	-3.21711	1.20094	-2.67882	0.00738812	0.704527	HAVCR2	hepatitis A virus cellular receptor 2 [Source:NCBI gene;Acc:768047]
ENSBTAG00000009153	41.9135	-2.18503	0.817045	-2.67431	0.00748835	0.710385	MLXIPL	MLX interacting protein like [Source:VGNC Symbol;Acc:VGNC:31510]
ENSBTAG00000003727	745.256	-0.949166	0.355627	-2.66899	0.00760788	0.714322	SH3KBP1	SH3 domain containing kinase binding protein 1 [Source:VGNC Symbol;Acc:VGNC:34577]
ENSBTAG00000030208	6.3172	-5.15442	1.9303	-2.67027	0.00757908	0.714322	ERFE	erythroferrone [Source:VGNC Symbol;Acc:VGNC:28577]
ENSBTAG00000010215	415.812	0.824852	0.309802	2.66251	0.00775596	0.717191	CREB3L3	cAMP responsive element binding protein 3 like 3 [Source:VGNC Symbol;Acc:VGNC:27696]
ENSBTAG00000011182	32370.2	0.407431	0.152897	2.66474	0.00770489	0.717191	PDLIM1	PDZ and LIM domain 1 [Source:VGNC Symbol;Acc:VGNC:32707]
ENSBTAG00000018316	9.10583	-5.63906	2.11776	-2.66275	0.00775043	0.717191	ZMYND15	zinc finger MYND-type containing 15 [Source:VGNC Symbol;Acc:VGNC:37204]
ENSBTAG00000004587	741.555	-1.2276	0.461712	-2.65881	0.00784176	0.721482	DUSP6	dual specificity phosphatase 6 [Source:VGNC Symbol;Acc:VGNC:28262]
ENSBTAG00000005997	5957.36	-0.653786	0.246848	-2.64854	0.0080841	0.740059		multidrug resistance protein 1 [Source:NCBI gene;Acc:281585]
ENSBTAG00000020023	2013.03	0.475853	0.180245	2.64004	0.00828963	0.743995	MTHFS	5,10-methenyltetrahydrofolate synthetase (5-formyltetrahydrofolate cyclo-ligase) [Source:NCBI gene;Acc:513372]
ENSBTAG00000017913	21979.9	0.259823	0.0983604	2.64154	0.00825292	0.743995	BUB3	BUB3 mitotic checkpoint protein [Source:VGNC Symbol;Acc:VGNC:26606]
ENSBTAG00000045832	135.948	-1.50848	0.570486	-2.6442	0.00818852	0.743995	PHLPP1	PH domain and leucine rich repeat protein phosphatase 1 [Source:VGNC Symbol;Acc:VGNC:32840]
ENSBTAG00000004595	17.7412	-3.37806	1.27884	-2.64151	0.00825382	0.743995	GML	glycosylphosphatidylinositol anchored molecule like [Source:VGNC Symbol;Acc:VGNC:29437]
ENSBTAG00000020054	457.608	-0.718881	0.272691	-2.63625	0.00838286	0.748692	TNFRSF21	TNF receptor superfamily member 21 [Source:VGNC Symbol;Acc:VGNC:36166]
ENSBTAG00000013848	11.0601	5.88715	2.23552	2.63346	0.00845192	0.751195	ADGRD1	adhesion G protein-coupled receptor D1 [Source:VGNC Symbol;Acc:VGNC:53887]
ENSBTAG00000021581	19.8489	-3.28461	1.24827	-2.63132	0.00850531	0.752289	FHOD3	formin homology 2 domain containing 3 [Source:VGNC Symbol;Acc:VGNC:29004]
ENSBTAG00000015912	79.3342	-1.41436	0.538383	-2.62705	0.00861293	0.758145	DMKN	dermokine [Source:VGNC Symbol;Acc:VGNC:28107]
ENSBTAG00000018260	1256.12	-0.787118	0.300033	-2.62344	0.0087046	0.762548	MFSD11	major facilitator superfamily domain containing 11 [Source:VGNC Symbol;Acc:VGNC:31433]
ENSBTAG00000008649	257.706	-0.747351	0.285215	-2.62031	0.00878509	0.765934	ETV3	ETS variant 3 [Source:VGNC Symbol;Acc:VGNC:50176]
ENSBTAG00000006396	21999.7	0.49323	0.188471	2.617	0.00887056	0.76609	GPI	glucose-6-phosphate isomerase [Source:VGNC Symbol;Acc:VGNC:29534]
ENSBTAG00000018862	272.335	-1.20841	0.461631	-2.6177	0.00885237	0.76609	EIF4E3	eukaryotic translation initiation factor 4E family member 3 [Source:VGNC Symbol;Acc:VGNC:28411]
ENSBTAG00000010906	395.791	0.747225	0.285908	2.61352	0.00896151	0.768908	RPS6KA5	ribosomal protein S6 kinase A5 [Source:VGNC Symbol;Acc:VGNC:34144]
ENSBTAG00000005793	338.98	-0.604545	0.2318	-2.60805	0.00910598	0.768908	PEA15	proliferation and apoptosis adaptor protein 15 [Source:VGNC Symbol;Acc:VGNC:32732]
ENSBTAG00000002843	323.825	-0.827972	0.317267	-2.6097	0.00906208	0.768908	ACOT4	acyl-CoA thioesterase 4 [Source:NCBI gene;Acc:511431]
ENSBTAG00000051340	18.3223	-1.99732	0.765478	-2.60925	0.00907415	0.768908
ENSBTAG00000011080	15.7599	-3.40799	1.30685	-2.60778	0.00911318	0.768908	TLX1	T cell leukemia homeobox 1 [Source:NCBI gene;Acc:505304]
ENSBTAG00000049545	166.551	-0.928916	0.35663	-2.60471	0.00919526	0.770866		zinc finger protein 239-like [Source:NCBI gene;Acc:112443783]
ENSBTAG00000032642	134.111	-2.67182	1.02614	-2.60377	0.00922058	0.770866	GSTA3	glutathione S-transferase, alpha 3 [Source:NCBI gene;Acc:768055]
ENSBTAG00000017890	382.844	0.921294	0.357227	2.57902	0.00990818	0.775251	ZMAT5	zinc finger matrin-type 5 [Source:VGNC Symbol;Acc:VGNC:37194]
ENSBTAG00000018073	499.931	0.721715	0.279715	2.58017	0.00987505	0.775251	TSPO	translocator protein [Source:VGNC Symbol;Acc:VGNC:49066]
ENSBTAG00000025817	339.539	0.667614	0.258362	2.58402	0.00976552	0.775251	BORCS8	BLOC-1 related complex subunit 8 [Source:NCBI gene;Acc:100271850]
ENSBTAG00000002993	9009.29	0.330913	0.127999	2.58528	0.00973002	0.775251	SFT2D1	SFT2 domain containing 1 [Source:NCBI gene;Acc:524821]
ENSBTAG00000010503	797.744	0.320516	0.12392	2.58647	0.00969657	0.775251	TIMM9	translocase of inner mitochondrial membrane 9 [Source:VGNC Symbol;Acc:VGNC:55149]
ENSBTAG00000055014	7320.43	-0.521065	0.201366	-2.58765	0.00966323	0.775251	SH3BGRL2	SH3 domain binding glutamate rich protein like 2 [Source:NCBI gene;Acc:785404]
ENSBTAG00000003902	388.026	-0.62313	0.239941	-2.59701	0.00940382	0.775251	ZNF512	zinc finger protein 512 [Source:VGNC Symbol;Acc:VGNC:37290]
ENSBTAG00000008160	639.768	-0.796908	0.307666	-2.59017	0.00959278	0.775251	MBOAT2	membrane bound O-acyltransferase domain containing 2 [Source:VGNC Symbol;Acc:VGNC:31287]
ENSBTAG00000004945	145.214	-0.912068	0.353406	-2.58079	0.00985739	0.775251	BBS7	Bardet-Biedl syndrome 7 [Source:NCBI gene;Acc:100138953]
ENSBTAG00000021433	593.68	-0.919771	0.354233	-2.59651	0.00941757	0.775251		zinc finger protein 665 [Source:NCBI gene;Acc:508131]
ENSBTAG00000002962	218.659	-1.57425	0.609724	-2.58191	0.00982563	0.775251	PPM1M	protein phosphatase, Mg2+/Mn2+ dependent 1M [Source:VGNC Symbol;Acc:VGNC:33217]
ENSBTAG00000009979	17.3579	-2.211	0.850346	-2.60012	0.00931906	0.775251	HOXB2	homeobox B2 [Source:VGNC Symbol;Acc:VGNC:29918]
ENSBTAG00000017223	32.4339	-2.4814	0.958769	-2.58811	0.00965051	0.775251	MEST	mesoderm specific transcript [Source:VGNC Symbol;Acc:VGNC:31393]
ENSBTAG00000003919	10.3591	-4.78291	1.84614	-2.59077	0.0095762	0.775251	KIAA0408	KIAA0408 [Source:VGNC Symbol;Acc:VGNC:30552]
ENSBTAG00000000124	9.24939	-7.07425	2.73032	-2.59099	0.00956993	0.775251	DHH	desert hedgehog signaling molecule [Source:VGNC Symbol;Acc:VGNC:28037]
ENSBTAG00000014422	395.968	-1.18504	0.459781	-2.5774	0.00995453	0.775564	MTMR10	myotubularin related protein 10 [Source:VGNC Symbol;Acc:VGNC:31737]
ENSBTAG00000026278	5829.24	-0.8296	0.32262	-2.57144	0.0101276	0.785701	CLDN4	claudin 4 [Source:VGNC Symbol;Acc:VGNC:27416]
ENSBTAG00000009138	685.424	-0.619286	0.241038	-2.56925	0.010192	0.787361	UBXN2B	UBX domain protein 2B [Source:VGNC Symbol;Acc:VGNC:36626]
ENSBTAG00000009786	3008.48	-1.24695	0.485763	-2.56699	0.0102586	0.78918	SCIN	scinderin [Source:VGNC Symbol;Acc:VGNC:34339]
ENSBTAG00000032902	570.506	-0.9146	0.356603	-2.56476	0.0103248	0.790945		solute carrier family 11 (proton-coupled divalent metal ion transporters), member 2-like [Source:NCBI gene;Acc:512464]
ENSBTAG00000007364	545.057	1.06741	0.417549	2.55637	0.0105772	0.791131	PMS2	PMS1 homolog 2, mismatch repair system component [Source:NCBI gene;Acc:527039]
ENSBTAG00000011951	3809.78	0.634305	0.247734	2.56043	0.0104544	0.791131	MRTO4	MRT4 homolog, ribosome maturation factor [Source:VGNC Symbol;Acc:VGNC:31680]
ENSBTAG00000018887	1389.55	0.524657	0.205323	2.55528	0.0106104	0.791131	IPO13	importin 13 [Source:VGNC Symbol;Acc:VGNC:30241]
ENSBTAG00000007367	6568.03	0.367394	0.14378	2.55525	0.0106111	0.791131	AIMP2	aminoacyl tRNA synthetase complex interacting multifunctional protein 2 [Source:VGNC Symbol;Acc:VGNC:25766]
ENSBTAG00000038480	397.245	-0.865182	0.33867	-2.55464	0.0106297	0.791131	FPGT	fucose-1-phosphate guanylyltransferase [Source:VGNC Symbol;Acc:VGNC:29109]
ENSBTAG00000038126	45.0646	-1.29818	0.508139	-2.55477	0.0106259	0.791131	WIPF2	WAS/WASL interacting protein family member 2 [Source:VGNC Symbol;Acc:VGNC:36940]
ENSBTAG00000003864	505.924	-1.57434	0.61582	-2.55649	0.0105735	0.791131	SLC13A4	solute carrier family 13 member 4 [Source:VGNC Symbol;Acc:VGNC:34676]
ENSBTAG00000004735	7121.57	0.505589	0.198678	2.54477	0.0109351	0.791488	CCNE1	cyclin E1 [Source:VGNC Symbol;Acc:VGNC:26966]
ENSBTAG00000015280	3722.76	0.401238	0.15728	2.5511	0.0107383	0.791488	KIF2C	kinesin family member 2C [Source:VGNC Symbol;Acc:VGNC:30601]
ENSBTAG00000002203	28773.3	0.25405	0.0996717	2.54887	0.0108072	0.791488	NDUFS2	NADH:ubiquinone oxidoreductase core subunit S2 [Source:VGNC Symbol;Acc:VGNC:31969]
ENSBTAG00000019998	499.421	-0.547858	0.215609	-2.54098	0.0110544	0.791488	HAGH	hydroxyacylglutathione hydrolase [Source:VGNC Symbol;Acc:VGNC:29742]
ENSBTAG00000005989	6850.15	-0.55167	0.216672	-2.5461	0.0108933	0.791488	LAP3	leucine aminopeptidase 3 [Source:VGNC Symbol;Acc:VGNC:30786]
ENSBTAG00000047827	5133.14	-0.608908	0.239624	-2.5411	0.0110504	0.791488	RENBP	renin binding protein [Source:VGNC Symbol;Acc:VGNC:33866]
ENSBTAG00000004881	3834.14	-0.77632	0.305732	-2.53922	0.01111	0.791488	MTHFD2	methylenetetrahydrofolate dehydrogenase (NADP+ dependent) 2, methenyltetrahydrofolate cyclohydrolase [Source:NCBI gene;Acc:517539]
ENSBTAG00000021867	282.613	-0.864755	0.340158	-2.54221	0.0110153	0.791488	BFSP1	beaded filament structural protein 1 [Source:VGNC Symbol;Acc:VGNC:26478]
ENSBTAG00000015905	224.473	-1.2364	0.485993	-2.54408	0.0109567	0.791488	ARHGAP32	Rho GTPase activating protein 32 [Source:VGNC Symbol;Acc:VGNC:26090]
ENSBTAG00000046152	98.8599	-2.00087	0.787809	-2.53979	0.011092	0.791488	MGAM	maltase-glucoamylase [Source:VGNC Symbol;Acc:VGNC:31446]
ENSBTAG00000020810	53.4659	-2.11244	0.828111	-2.55092	0.010744	0.791488	CYB561	cytochrome b561 [Source:VGNC Symbol;Acc:VGNC:50257]
ENSBTAG00000031383	9.24345	6.90448	2.72132	2.53718	0.011175	0.793033	SMIM24	small integral membrane protein 24 [Source:VGNC Symbol;Acc:VGNC:35020]
ENSBTAG00000022294	2948.36	-1.06748	0.421446	-2.5329	0.0113123	0.799677	FADS1	fatty acid desaturase 1 [Source:VGNC Symbol;Acc:VGNC:28701]
ENSBTAG00000034346	10.6591	6.14861	2.43475	2.52536	0.011558	0.807052	BTG4	BTG anti-proliferation factor 4 [Source:VGNC Symbol;Acc:VGNC:26600]
ENSBTAG00000014021	423.735	0.616217	0.243924	2.52627	0.011528	0.807052	UBN2	ubinuclein 2 [Source:VGNC Symbol;Acc:VGNC:36611]
ENSBTAG00000020495	780.084	-1.05213	0.416799	-2.5243	0.0115929	0.807052	SH3YL1	SH3 and SYLF domain containing 1 [Source:VGNC Symbol;Acc:VGNC:34584]
ENSBTAG00000035064	19.6753	-4.60798	1.82523	-2.5246	0.0115831	0.807052	C4H7orf57	chromosome 4 C7orf57 homolog [Source:NCBI gene;Acc:614195]
ENSBTAG00000008940	232.488	-2.10334	0.834549	-2.52033	0.0117246	0.813128	NPTX1	neuronal pentraxin 1 [Source:VGNC Symbol;Acc:VGNC:32218]
ENSBTAG00000019777	4369.96	0.44028	0.174864	2.51785	0.0118075	0.815787	CDCA3	cell division cycle associated 3 [Source:VGNC Symbol;Acc:VGNC:27084]
ENSBTAG00000019234	13.7415	5.26691	2.10176	2.50595	0.0122123	0.823378	BMP6	bone morphogenetic protein 6 [Source:VGNC Symbol;Acc:VGNC:26521]
ENSBTAG00000002417	1473.19	0.726579	0.289318	2.51135	0.0120269	0.823378	RAB30	RAB30, member RAS oncogene family [Source:VGNC Symbol;Acc:VGNC:33639]
ENSBTAG00000003521	288.122	0.546283	0.217589	2.51062	0.0120521	0.823378	KIAA0895L	KIAA0895 like [Source:VGNC Symbol;Acc:VGNC:30558]
ENSBTAG00000020900	979.989	0.485849	0.193923	2.50537	0.0122322	0.823378	RPUSD4	RNA pseudouridine synthase D4 [Source:VGNC Symbol;Acc:VGNC:34157]
ENSBTAG00000013150	2388.9	0.484156	0.192979	2.50885	0.0121124	0.823378	THOC5	THO complex 5 [Source:VGNC Symbol;Acc:VGNC:35841]
ENSBTAG00000048011	281.318	-0.907035	0.36184	-2.50673	0.0121854	0.823378	GPR160	G protein-coupled receptor 160 [Source:VGNC Symbol;Acc:VGNC:29565]
ENSBTAG00000048927	11.4572	-6.80698	2.71556	-2.50666	0.0121877	0.823378		olfactory receptor 5 [Source:NCBI gene;Acc:617592]
ENSBTAG00000005999	822.205	0.574776	0.22985	2.50066	0.0123962	0.831193	FSD1	fibronectin type III and SPRY domain containing 1 [Source:VGNC Symbol;Acc:VGNC:29129]
ENSBTAG00000014485	185.178	-0.90503	0.36228	-2.49815	0.0124845	0.831193	POF1B	POF1B actin binding protein [Source:VGNC Symbol;Acc:VGNC:33104]
ENSBTAG00000049666	50.6512	-1.74569	0.698525	-2.4991	0.0124508	0.831193	CYP3A5	cytochrome P450, subfamily IIIA (niphedipine oxidase), polypeptide 4 [Source:NCBI gene;Acc:282214]
ENSBTAG00000002413	1874.96	0.580476	0.232544	2.4962	0.0125532	0.832743	MCAT	malonyl-CoA-acyl carrier protein transacylase [Source:VGNC Symbol;Acc:VGNC:31297]
ENSBTAG00000037375	790.202	0.839616	0.337543	2.48744	0.0128668	0.838355		zinc finger protein 547-like [Source:NCBI gene;Acc:512684]
ENSBTAG00000008243	939.613	-0.522891	0.210039	-2.48949	0.0127928	0.838355	LRRC40	leucine rich repeat containing 40 [Source:VGNC Symbol;Acc:VGNC:31015]
ENSBTAG00000004723	941.884	-1.01924	0.409413	-2.48951	0.012792	0.838355	TEX2	testis expressed 2 [Source:VGNC Symbol;Acc:VGNC:35763]
ENSBTAG00000052247	103.079	-1.35264	0.543636	-2.48814	0.0128415	0.838355	TPPP	tubulin polymerization promoting protein [Source:NCBI gene;Acc:280968]
ENSBTAG00000012567	42.2181	-2.10403	0.845818	-2.48756	0.0128622	0.838355	TERT	telomerase reverse transcriptase [Source:VGNC Symbol;Acc:VGNC:35751]
ENSBTAG00000008825	2152.8	0.318449	0.128169	2.48461	0.0129693	0.842038	POLR3F	RNA polymerase III subunit F [Source:VGNC Symbol;Acc:VGNC:33150]
ENSBTAG00000012012	292.641	-0.570948	0.230387	-2.47822	0.0132041	0.854255	CYB5A	cytochrome b5 type A [Source:VGNC Symbol;Acc:VGNC:50260]
ENSBTAG00000019803	2907.18	0.392123	0.158426	2.47511	0.0133194	0.85868	POLR3K	RNA polymerase III subunit K [Source:VGNC Symbol;Acc:VGNC:33153]
ENSBTAG00000044035	6.98601	6.62555	2.67868	2.47343	0.0133821	0.859696	GPRIN1	G protein regulated inducer of neurite outgrowth 1 [Source:VGNC Symbol;Acc:VGNC:29609]
ENSBTAG00000006511	489.197	-0.66187	0.267877	-2.4708	0.0134811	0.863024	MTF1	metal regulatory transcription factor 1 [Source:VGNC Symbol;Acc:VGNC:31722]
ENSBTAG00000005225	2250.13	0.399581	0.162008	2.46643	0.0136467	0.867966	RAD52	RAD52 homolog, DNA repair protein [Source:VGNC Symbol;Acc:VGNC:33688]
ENSBTAG00000002813	826.549	-0.640375	0.259654	-2.46626	0.0136531	0.867966	GAB1	GRB2 associated binding protein 1 [Source:VGNC Symbol;Acc:VGNC:29183]
ENSBTAG00000020729	4326.89	0.573795	0.232807	2.46468	0.0137136	0.868248	DHRS7	dehydrogenase/reductase 7 [Source:VGNC Symbol;Acc:VGNC:28043]
ENSBTAG00000054475	36.1902	-8.70853	3.53478	-2.46367	0.0137524	0.868248		melanoma antigen preferentially expressed in tumors [Source:NCBI gene;Acc:525101]
ENSBTAG00000014913	319.403	-1.00866	0.409872	-2.4609	0.0138587	0.871958	SRD5A3	steroid 5 alpha-reductase 3 [Source:VGNC Symbol;Acc:VGNC:35273]
ENSBTAG00000005146	170.436	1.34143	0.547284	2.45106	0.0142435	0.88006
ENSBTAG00000000561	19199.8	0.29514	0.120169	2.45603	0.014048	0.88006	OCLN	occludin [Source:VGNC Symbol;Acc:VGNC:32397]
ENSBTAG00000007813	163.521	-0.687333	0.280296	-2.45217	0.0141998	0.88006	CMC4	C-X9-C motif containing 4 [Source:VGNC Symbol;Acc:VGNC:27479]
ENSBTAG00000020270	386.342	-1.07618	0.439213	-2.45024	0.0142759	0.88006	NFKB1	nuclear factor kappa B subunit 1 [Source:VGNC Symbol;Acc:VGNC:32043]
ENSBTAG00000018294	536.469	-1.50202	0.611824	-2.45498	0.0140891	0.88006	DNASE1L3	deoxyribonuclease 1 like 3 [Source:VGNC Symbol;Acc:VGNC:28135]
ENSBTAG00000012673	64.7244	-1.52004	0.620198	-2.4509	0.01425	0.88006	CDK18	cyclin dependent kinase 18 [Source:VGNC Symbol;Acc:VGNC:27121]
ENSBTAG00000020528	932.468	0.47241	0.193005	2.44766	0.0143789	0.881029	PCOLCE	procollagen C-endopeptidase enhancer [Source:VGNC Symbol;Acc:VGNC:32642]
ENSBTAG00000005016	3877.76	-0.402498	0.164538	-2.44623	0.014436	0.881029	AP3B1	adaptor related protein complex 3 subunit beta 1 [Source:VGNC Symbol;Acc:VGNC:25987]
ENSBTAG00000027080	6.9977	-3.77666	1.54326	-2.44721	0.0143969	0.881029	SLC8A3	solute carrier family 8 member A3 [Source:VGNC Symbol;Acc:VGNC:34937]
ENSBTAG00000015040	21.6617	1.72624	0.706658	2.44282	0.014573	0.886437		sphingomyelin phosphodiesterase 5, pseudogene [Source:NCBI gene;Acc:100141215]
ENSBTAG00000005152	142.336	1.1203	0.461353	2.42829	0.0151702	0.889234		thymidine kinase 2 [Source:NCBI gene;Acc:615457]
ENSBTAG00000015572	947.804	0.582312	0.239683	2.42951	0.0151194	0.889234	YTHDC1	YTH domain containing 1 [Source:VGNC Symbol;Acc:VGNC:37039]
ENSBTAG00000014262	21269	0.401401	0.165123	2.43092	0.0150607	0.889234	BZW2	basic leucine zipper and W2 domains 2 [Source:VGNC Symbol;Acc:VGNC:26613]
ENSBTAG00000016075	4882.4	0.312781	0.128843	2.42762	0.0151983	0.889234	EMC8	ER membrane protein complex subunit 8 [Source:VGNC Symbol;Acc:VGNC:28467]
ENSBTAG00000014166	4311.7	-0.395946	0.162361	-2.43868	0.0147412	0.889234	POLR1B	RNA polymerase I subunit B [Source:VGNC Symbol;Acc:VGNC:33132]
ENSBTAG00000025755	1346.65	-0.488432	0.201205	-2.42753	0.0152018	0.889234	RNF212B	ring finger protein 212B [Source:VGNC Symbol;Acc:VGNC:34050]
ENSBTAG00000012022	233.747	-1.11921	0.460658	-2.42959	0.015116	0.889234	TBC1D2B	TBC1 domain family member 2B [Source:VGNC Symbol;Acc:VGNC:35640]
ENSBTAG00000016505	82.3368	-2.65026	1.08866	-2.43442	0.0149155	0.889234	TMC7	transmembrane channel like 7 [Source:VGNC Symbol;Acc:VGNC:35923]
ENSBTAG00000005724	77.064	-2.82049	1.15905	-2.43345	0.0149556	0.889234	SYTL4	synaptotagmin like 4 [Source:VGNC Symbol;Acc:VGNC:35548]
ENSBTAG00000019226	73.8979	-3.45206	1.42017	-2.43073	0.0150684	0.889234	PAG8	pregnancy-associated glycoprotein 8 [Source:NCBI gene;Acc:337902]
ENSBTAG00000013737	14.6465	-5.08884	2.09334	-2.43097	0.0150586	0.889234	MROH8	maestro heat like repeat family member 8 [Source:VGNC Symbol;Acc:VGNC:50026]
ENSBTAG00000006732	13.7896	-5.36487	2.19838	-2.44037	0.014672	0.889234	NRCAM	neuronal cell adhesion molecule [Source:VGNC Symbol;Acc:VGNC:32257]
ENSBTAG00000011876	1399.36	-0.674946	0.278317	-2.4251	0.0153041	0.889535	MORC3	MORC family CW-type zinc finger 3 [Source:VGNC Symbol;Acc:VGNC:31556]
ENSBTAG00000019266	8.88168	-6.73634	2.77765	-2.4252	0.0153	0.889535	TDRD12	tudor domain containing 12 [Source:VGNC Symbol;Acc:VGNC:35717]
ENSBTAG00000019327	13.4438	7.4526	3.12007	2.3886	0.0169128	0.890645	NRAP	nebulin related anchoring protein [Source:VGNC Symbol;Acc:VGNC:32251]
ENSBTAG00000018807	19.7345	4.31081	1.80115	2.39337	0.0166944	0.890645	MYBPHL	myosin binding protein H like [Source:VGNC Symbol;Acc:VGNC:31783]
ENSBTAG00000010664	231.681	1.34315	0.559911	2.39887	0.0164459	0.890645	PRKCQ	protein kinase C theta [Source:VGNC Symbol;Acc:VGNC:33334]
ENSBTAG00000049369	53.9036	0.945019	0.394438	2.39586	0.0165814	0.890645	MYMX	myomixer, myoblast fusion factor [Source:HGNC Symbol;Acc:HGNC:52391]
ENSBTAG00000026275	1668.98	0.76713	0.319313	2.40244	0.016286	0.890645	CCL24	C-C motif chemokine ligand 24 [Source:VGNC Symbol;Acc:VGNC:26950]
ENSBTAG00000019830	696.899	0.673134	0.28086	2.39669	0.016544	0.890645	MRPL46	mitochondrial ribosomal protein L46 [Source:VGNC Symbol;Acc:VGNC:31641]
ENSBTAG00000005234	410.383	0.610696	0.253097	2.41289	0.0158264	0.890645	LYPD1	LY6/PLAUR domain containing 1 [Source:VGNC Symbol;Acc:VGNC:31099]
ENSBTAG00000005715	1020.44	0.558983	0.233736	2.39152	0.0167789	0.890645	FUOM	fucose mutarotase [Source:VGNC Symbol;Acc:VGNC:29145]
ENSBTAG00000019238	1794.69	0.494248	0.206896	2.38887	0.0169001	0.890645	TRMO	tRNA methyltransferase O [Source:VGNC Symbol;Acc:VGNC:36364]
ENSBTAG00000002833	1786.64	0.45534	0.190016	2.39632	0.0165604	0.890645	FBXO22	F-box protein 22 [Source:VGNC Symbol;Acc:VGNC:28899]
ENSBTAG00000004850	2930.56	0.448772	0.187241	2.39676	0.0165407	0.890645	KPNA3	karyopherin subunit alpha 3 [Source:VGNC Symbol;Acc:VGNC:30702]
ENSBTAG00000012024	808.531	0.444497	0.184485	2.4094	0.0159789	0.890645	SLC29A2	solute carrier family 29 member 2 [Source:VGNC Symbol;Acc:VGNC:34794]
ENSBTAG00000001645	2885.86	0.430801	0.180403	2.38799	0.0169407	0.890645	AAR2	AAR2 splicing factor [Source:VGNC Symbol;Acc:VGNC:25446]
ENSBTAG00000015602	1141.48	0.425239	0.17759	2.3945	0.0166429	0.890645	MRNIP	MRN complex interacting protein [Source:VGNC Symbol;Acc:VGNC:52861]
ENSBTAG00000003813	4400.29	0.402385	0.166858	2.41154	0.0158854	0.890645	BCS1L	BCS1 homolog, ubiquinol-cytochrome c reductase complex chaperone [Source:VGNC Symbol;Acc:VGNC:26456]
ENSBTAG00000006482	3878.83	0.37362	0.155113	2.40869	0.01601	0.890645	PTCD3	pentatricopeptide repeat domain 3 [Source:VGNC Symbol;Acc:VGNC:33491]
ENSBTAG00000019987	3351.06	0.357992	0.14897	2.40311	0.0162562	0.890645	RPP14	ribonuclease P/MRP subunit p14 [Source:NCBI gene;Acc:515208]
ENSBTAG00000033041	2165.27	0.350935	0.146908	2.38881	0.0169029	0.890645	YIPF4	Yip1 domain family member 4 [Source:VGNC Symbol;Acc:VGNC:58427]
ENSBTAG00000021007	23834.5	0.349171	0.146268	2.3872	0.0169772	0.890645	FOLR1	folate receptor alpha [Source:NCBI gene;Acc:539750]
ENSBTAG00000016730	5514.39	-0.304813	0.12683	-2.40332	0.0162468	0.890645	ANP32E	acidic nuclear phosphoprotein 32 family member E [Source:VGNC Symbol;Acc:VGNC:25959]
ENSBTAG00000015119	360.229	-0.724515	0.301126	-2.40602	0.0161274	0.890645	SIK3	SIK family kinase 3 [Source:VGNC Symbol;Acc:VGNC:34620]
ENSBTAG00000021587	2737.27	-0.74865	0.311495	-2.40341	0.0162431	0.890645	SMPDL3A	sphingomyelin phosphodiesterase acid like 3A [Source:VGNC Symbol;Acc:VGNC:35033]
ENSBTAG00000034090	1274.96	-0.759617	0.314718	-2.41364	0.0157941	0.890645
ENSBTAG00000049306	1705.47	-0.833253	0.344002	-2.42223	0.0154255	0.890645	MSRB1	methionine sulfoxide reductase B1 [Source:NCBI gene;Acc:618441]
ENSBTAG00000020418	643.898	-0.864086	0.360929	-2.39406	0.0166631	0.890645	CA5B	carbonic anhydrase 5B [Source:VGNC Symbol;Acc:VGNC:26655]
ENSBTAG00000014247	452.007	-1.20785	0.503012	-2.40123	0.0163399	0.890645	FAM83F	family with sequence similarity 83 member F [Source:VGNC Symbol;Acc:VGNC:28837]
ENSBTAG00000008672	178.684	-1.32969	0.548923	-2.42237	0.0154197	0.890645	GABRD	gamma-aminobutyric acid type A receptor delta subunit [Source:VGNC Symbol;Acc:VGNC:29198]
ENSBTAG00000046533	282.782	-1.45262	0.607511	-2.3911	0.0167979	0.890645	RAB31	RAB31, member RAS oncogene family [Source:VGNC Symbol;Acc:VGNC:33640]
ENSBTAG00000014898	24.0445	-2.10829	0.879322	-2.39762	0.0165018	0.890645	HK3	hexokinase 3 [Source:VGNC Symbol;Acc:VGNC:29866]
ENSBTAG00000055051	68.5305	-2.55729	1.06658	-2.39766	0.0165	0.890645	RNF125	ring finger protein 125 [Source:NCBI gene;Acc:519541]
ENSBTAG00000020800	26.4603	-2.71237	1.13146	-2.39722	0.0165199	0.890645	BEND7	BEN domain containing 7 [Source:VGNC Symbol;Acc:VGNC:26470]
ENSBTAG00000039186	6.61097	-5.30732	2.20996	-2.40155	0.0163259	0.890645		glycoprotein galactosyltransferase alpha 1, 3-like [Source:NCBI gene;Acc:527409]
ENSBTAG00000044055	12.9114	-6.92902	2.86583	-2.4178	0.0156146	0.890645	THSD7B	thrombospondin type 1 domain containing 7B [Source:VGNC Symbol;Acc:VGNC:35851]
ENSBTAG00000008779	13.8669	-7.52452	3.14477	-2.39271	0.0167246	0.890645	ALOX15B	arachidonate 15-lipoxygenase type B [Source:VGNC Symbol;Acc:VGNC:55769]
ENSBTAG00000021483	15.446	4.73553	1.98992	2.37976	0.017324	0.900467	OLFML1	olfactomedin like 1 [Source:VGNC Symbol;Acc:VGNC:32421]
ENSBTAG00000018179	22.0973	3.53571	1.49506	2.36493	0.0180334	0.900467	PCDH8	protocadherin 8 [Source:VGNC Symbol;Acc:VGNC:32622]
ENSBTAG00000026825	2166.57	0.52731	0.221848	2.3769	0.0174587	0.900467	TMEM37	transmembrane protein 37 [Source:VGNC Symbol;Acc:VGNC:36079]
ENSBTAG00000009484	859.569	0.494238	0.2089	2.36591	0.0179856	0.900467	TAF6L	TATA-box binding protein associated factor 6 like [Source:VGNC Symbol;Acc:VGNC:35578]
ENSBTAG00000051467	458.965	0.490413	0.207098	2.36802	0.0178835	0.900467	COA6	cytochrome c oxidase assembly factor 6 homolog (S. cerevisiae) [Source:NCBI gene;Acc:768072]
ENSBTAG00000001280	854.139	0.472777	0.198896	2.37701	0.0174536	0.900467	CLPB	ClpB homolog, mitochondrial AAA ATPase chaperonin [Source:VGNC Symbol;Acc:VGNC:27458]
ENSBTAG00000007668	6964.66	0.422398	0.178372	2.36807	0.017881	0.900467	AGPAT4	1-acylglycerol-3-phosphate O-acyltransferase 4 [Source:VGNC Symbol;Acc:VGNC:25737]
ENSBTAG00000006070	486.212	0.414684	0.175425	2.36388	0.0180845	0.900467	RANBP3	RAN binding protein 3 [Source:VGNC Symbol;Acc:VGNC:33710]
ENSBTAG00000012063	2718.44	0.363084	0.153446	2.3662	0.0179717	0.900467	E2F4	E2F transcription factor 4 [Source:VGNC Symbol;Acc:VGNC:28288]
ENSBTAG00000006441	18165.3	0.296935	0.124808	2.37914	0.0173531	0.900467	ATP5PB	ATP synthase peripheral stalk-membrane subunit b [Source:VGNC Symbol;Acc:VGNC:26303]
ENSBTAG00000022461	1456.95	-0.384947	0.16248	-2.36919	0.0178269	0.900467	SEPTIN10	septin 10 [Source:VGNC Symbol;Acc:VGNC:34450]
ENSBTAG00000008435	956.045	-0.726851	0.307073	-2.36703	0.0179314	0.900467	DELE1	DAP3 binding cell death enhancer 1 [Source:VGNC Symbol;Acc:VGNC:50135]
ENSBTAG00000013824	885.078	-0.739197	0.312744	-2.36359	0.0180988	0.900467	WWC3	WWC family member 3 [Source:VGNC Symbol;Acc:VGNC:36976]
ENSBTAG00000012387	103.378	-1.00388	0.421568	-2.38129	0.0172522	0.900467	PAM	peptidylglycine alpha-amidating monooxygenase [Source:VGNC Symbol;Acc:VGNC:32561]
ENSBTAG00000006859	26.8538	-1.526	0.643122	-2.3728	0.017654	0.900467
ENSBTAG00000039820	41.4228	-3.87793	1.63204	-2.37612	0.0174958	0.900467	CLDN8	claudin 8 [Source:VGNC Symbol;Acc:VGNC:27419]
ENSBTAG00000021003	7.15075	-6.58091	2.77439	-2.37202	0.017691	0.900467	GALR1	galanin receptor 1 [Source:VGNC Symbol;Acc:VGNC:29239]
ENSBTAG00000006155	10.2852	-6.81176	2.87929	-2.36578	0.0179923	0.900467	CCRL2	C-C motif chemokine receptor like 2 [Source:VGNC Symbol;Acc:VGNC:26990]
ENSBTAG00000016063	8.95588	-6.83369	2.8904	-2.36427	0.0180655	0.900467	DNER	delta/notch like EGF repeat containing [Source:VGNC Symbol;Acc:VGNC:28139]
ENSBTAG00000019930	3703.82	0.521916	0.220941	2.36224	0.0181649	0.901303	CLNS1A	chloride nucleotide-sensitive channel 1A [Source:VGNC Symbol;Acc:VGNC:27455]
ENSBTAG00000024378	1328.49	0.379832	0.161014	2.35899	0.0183246	0.901896	MRPS21	mitochondrial ribosomal protein S21 [Source:VGNC Symbol;Acc:VGNC:31661]
ENSBTAG00000015258	266.381	-1.07379	0.455011	-2.35992	0.018279	0.901896	P2RX5	purinergic receptor P2X 5 [Source:NCBI gene;Acc:338035]
ENSBTAG00000054030	5.9272	-3.96068	1.67832	-2.3599	0.0182796	0.901896
ENSBTAG00000052425	5.79331	-4.65386	1.97731	-2.35363	0.018591	0.912552
ENSBTAG00000037728	415.917	-1.1939	0.507561	-2.35224	0.0186609	0.913538	PAGE4	PAGE family member 4 [Source:VGNC Symbol;Acc:VGNC:50182]
ENSBTAG00000011392	19.9038	3.81727	1.63284	2.33782	0.0193968	0.913798	MYBPC1	myosin binding protein C, slow type [Source:VGNC Symbol;Acc:VGNC:31780]
ENSBTAG00000003569	31.9994	1.87676	0.803572	2.33551	0.0195165	0.913798	DZIP1	DAZ interacting zinc finger protein 1 [Source:VGNC Symbol;Acc:VGNC:28284]
ENSBTAG00000031814	80.8103	1.16245	0.496421	2.34166	0.0191982	0.913798	SDS	serine dehydratase [Source:VGNC Symbol;Acc:VGNC:34399]
ENSBTAG00000021480	66.3293	0.841906	0.359788	2.34	0.0192835	0.913798	SAG	S-antigen visual arrestin [Source:VGNC Symbol;Acc:VGNC:34263]
ENSBTAG00000026748	7483.51	0.690406	0.294559	2.34386	0.0190854	0.913798	GULO	L-gulono-gamma-lactone oxidase [Source:NCBI gene;Acc:286812]
ENSBTAG00000015131	13007.8	0.613536	0.261755	2.34393	0.0190817	0.913798	SLC29A1	solute carrier family 29 member 1 [Source:VGNC Symbol;Acc:VGNC:54237]
ENSBTAG00000000014	5014.53	0.483252	0.206793	2.33689	0.019445	0.913798	TXN2	thioredoxin 2 [Source:VGNC Symbol;Acc:VGNC:36533]
ENSBTAG00000000404	1619.39	0.466154	0.199369	2.33815	0.0193794	0.913798	NAXE	NAD(P)HX epimerase [Source:VGNC Symbol;Acc:VGNC:55632]
ENSBTAG00000012975	54264.5	0.238301	0.101945	2.33756	0.0194101	0.913798	VDAC2	voltage dependent anion channel 2 [Source:VGNC Symbol;Acc:VGNC:36783]
ENSBTAG00000017465	2912.3	-0.494052	0.210386	-2.34831	0.018859	0.913798	GNS	glucosamine (N-acetyl)-6-sulfatase [Source:VGNC Symbol;Acc:VGNC:56204]
ENSBTAG00000054222	102.321	-0.944864	0.402894	-2.34519	0.0190172	0.913798		small VCP interacting protein [Source:NCBI gene;Acc:100300295]
ENSBTAG00000018446	3265.52	-1.0343	0.443936	-2.32985	0.0198142	0.913798	GCA	grancalcin [Source:VGNC Symbol;Acc:VGNC:29278]
ENSBTAG00000001179	266.141	-1.08656	0.465572	-2.33381	0.0196057	0.913798	TEP1	telomerase associated protein 1 [Source:VGNC Symbol;Acc:VGNC:35745]
ENSBTAG00000001819	373.635	-1.0991	0.471716	-2.33001	0.0198054	0.913798	CDX2	caudal type homeobox 2 [Source:NCBI gene;Acc:618679]
ENSBTAG00000001124	195.019	-1.14061	0.489016	-2.33246	0.0196763	0.913798	GALC	galactosylceramidase [Source:VGNC Symbol;Acc:VGNC:29217]
ENSBTAG00000047990	1934.13	-1.16963	0.49984	-2.34001	0.0192831	0.913798		major allergen Equ c 1-like [Source:NCBI gene;Acc:783399]
ENSBTAG00000033345	1285.34	-1.4675	0.628501	-2.33493	0.0195473	0.913798	STAR	steroidogenic acute regulatory protein [Source:VGNC Symbol;Acc:VGNC:35360]
ENSBTAG00000033429	23.8696	-1.77067	0.756762	-2.33979	0.0192945	0.913798	FAM229B	family with sequence similarity 229 member B [Source:VGNC Symbol;Acc:VGNC:28804]
ENSBTAG00000021182	185.666	-1.79698	0.768952	-2.33693	0.019443	0.913798	DOCK4	dedicator of cytokinesis 4 [Source:VGNC Symbol;Acc:VGNC:28158]
ENSBTAG00000046630	6.10759	-5.1166	2.19495	-2.33108	0.0197493	0.913798
ENSBTAG00000039285	8.581	-5.31275	2.25977	-2.35102	0.0187221	0.913798		casein kinase I [Source:NCBI gene;Acc:100138998]
ENSBTAG00000019173	9.61049	-6.12232	2.62651	-2.33097	0.0197547	0.913798	PAG12	pregnancy-associated glycoprotein 12 [Source:NCBI gene;Acc:337906]
ENSBTAG00000004792	10.4718	-6.585	2.80702	-2.3459	0.018981	0.913798	CHMP4C	charged multivesicular body protein 4C [Source:VGNC Symbol;Acc:VGNC:27303]
ENSBTAG00000016896	1361.27	-0.624189	0.268258	-2.32682	0.0199748	0.916586	HERPUD1	homocysteine inducible ER protein with ubiquitin like domain 1 [Source:VGNC Symbol;Acc:VGNC:29816]
ENSBTAG00000008198	36.3187	-1.10452	0.474592	-2.32731	0.0199487	0.916586	RGL3	ral guanine nucleotide dissociation stimulator like 3 [Source:VGNC Symbol;Acc:VGNC:33905]
ENSBTAG00000000815	267.87	-0.744011	0.320056	-2.32463	0.0200917	0.917356	EPHA2	EPH receptor A2 [Source:VGNC Symbol;Acc:VGNC:28534]
ENSBTAG00000007633	12.2625	-4.40152	1.89329	-2.32479	0.0200829	0.917356	ANKRD34B	ankyrin repeat domain 34B [Source:VGNC Symbol;Acc:VGNC:25925]
ENSBTAG00000012704	1836.76	0.54772	0.236085	2.32002	0.02034	0.921249	MMS19	MMS19 homolog, cytosolic iron-sulfur assembly component [Source:VGNC Symbol;Acc:VGNC:31534]
ENSBTAG00000017745	6350.72	0.517513	0.223132	2.31931	0.0203783	0.921249	IL6ST	interleukin 6 signal transducer [Source:VGNC Symbol;Acc:VGNC:30168]
ENSBTAG00000007039	700.136	-0.572683	0.246881	-2.31967	0.0203586	0.921249	FBXO25	F-box protein 25 [Source:VGNC Symbol;Acc:VGNC:28900]
ENSBTAG00000049434	1059.19	-0.901056	0.388121	-2.32159	0.0202551	0.921249		monocarboxylate transporter 1 [Source:NCBI gene;Acc:509911]
ENSBTAG00000011753	1865.52	0.433075	0.186831	2.318	0.0204492	0.922179	RCC1L	RCC1 like [Source:VGNC Symbol;Acc:VGNC:33826]
ENSBTAG00000054230	8.09966	-5.04564	2.17819	-2.31644	0.0205341	0.923734
ENSBTAG00000020898	1609.4	0.499252	0.215642	2.31519	0.0206026	0.924543	CHST12	carbohydrate sulfotransferase 12 [Source:VGNC Symbol;Acc:VGNC:27340]
ENSBTAG00000004100	254.168	1.28442	0.555462	2.31234	0.0207591	0.929287	TTI1	TELO2 interacting protein 1 [Source:VGNC Symbol;Acc:VGNC:36485]
ENSBTAG00000013534	7.16238	6.77445	2.93127	2.31109	0.0208276	0.93008	GFAP	glial fibrillary acidic protein [Source:VGNC Symbol;Acc:VGNC:29323]
ENSBTAG00000020589	52.1106	-3.00725	1.30226	-2.30926	0.0209293	0.932345	ENTPD1	ectonucleoside triphosphate diphosphohydrolase 1 [Source:NCBI gene;Acc:282223]
ENSBTAG00000004958	18.8705	-2.41408	1.04644	-2.30694	0.0210579	0.935799	PTPRN2	protein tyrosine phosphatase receptor type N2 [Source:NCBI gene;Acc:616515]
ENSBTAG00000005749	8.53499	6.51387	2.82706	2.30411	0.0212164	0.936199
ENSBTAG00000005805	23.2523	3.73166	1.62026	2.30312	0.021272	0.936199	EPHX4	epoxide hydrolase 4 [Source:VGNC Symbol;Acc:VGNC:28544]
ENSBTAG00000030974	788.919	0.550409	0.238849	2.30442	0.0211989	0.936199	TUBA4A	tubulin alpha 4a [Source:VGNC Symbol;Acc:VGNC:49986]
ENSBTAG00000018438	266.688	-1.37093	0.595071	-2.30382	0.0212328	0.936199	RRAGD	Ras related GTP binding D [Source:VGNC Symbol;Acc:VGNC:34161]
ENSBTAG00000024910	28.0207	-3.14248	1.36498	-2.30222	0.0213226	0.936199	GALR2	galanin receptor 2 [Source:VGNC Symbol;Acc:VGNC:29240]
ENSBTAG00000018299	739.138	0.583135	0.253736	2.29819	0.0215508	0.938794	PIGH	phosphatidylinositol glycan anchor biosynthesis class H [Source:VGNC Symbol;Acc:VGNC:32869]
ENSBTAG00000020226	1606.14	0.403528	0.175454	2.29991	0.0214535	0.938794	CHRAC1	chromatin accessibility complex subunit 1 [Source:VGNC Symbol;Acc:VGNC:27315]
ENSBTAG00000002650	13998	0.294937	0.12852	2.29487	0.0217406	0.938794	ZPR1	ZPR1 zinc finger [Source:VGNC Symbol;Acc:VGNC:37370]
ENSBTAG00000019404	1125.51	-0.458588	0.199813	-2.29509	0.0217282	0.938794	IL10RB	interleukin 10 receptor subunit beta [Source:VGNC Symbol;Acc:VGNC:56219]
ENSBTAG00000013664	416.776	-0.606462	0.263999	-2.29721	0.0216068	0.938794	FILIP1L	filamin A interacting protein 1 like [Source:VGNC Symbol;Acc:VGNC:29013]
ENSBTAG00000005923	505.14	-0.765366	0.33293	-2.29888	0.0215116	0.938794	ABTB2	ankyrin repeat and BTB domain containing 2 [Source:VGNC Symbol;Acc:VGNC:25516]
ENSBTAG00000019864	10.8022	-2.4085	1.04902	-2.29596	0.0216781	0.938794	MAPK15	mitogen-activated protein kinase 15 [Source:VGNC Symbol;Acc:VGNC:31217]
ENSBTAG00000002447	18.035	6.45391	2.81879	2.2896	0.0220442	0.947437	C7H19orf44	chromosome 7 C19orf44 homolog [Source:VGNC Symbol;Acc:VGNC:55200]
ENSBTAG00000001992	3081.03	-0.749353	0.327234	-2.28996	0.0220235	0.947437	CYP51A1	cytochrome P450, family 51, subfamily A, polypeptide 1 [Source:NCBI gene;Acc:505060]
ENSBTAG00000048549	1020.42	-1.39571	0.610495	-2.2862	0.0222424	0.953716	IFNT	Bos taurus interferon-tau 3g (IFNT), mRNA. [Source:RefSeq mRNA;Acc:NM_001168279]
ENSBTAG00000012347	10.3698	5.97288	2.63153	2.26974	0.0232233	0.954383	SLC51A	solute carrier family 51 alpha subunit [Source:VGNC Symbol;Acc:VGNC:34900]
ENSBTAG00000003039	23.9723	3.20617	1.40606	2.28026	0.0225925	0.954383	PSMB8	proteasome 20S subunit beta 8 [Source:VGNC Symbol;Acc:VGNC:33452]
ENSBTAG00000015334	73.9893	2.06768	0.911602	2.26819	0.0233179	0.954383	ZHX1	zinc fingers and homeoboxes 1 [Source:VGNC Symbol;Acc:VGNC:37182]
ENSBTAG00000016373	111.439	1.30301	0.573254	2.27301	0.0230253	0.954383	TTC26	tetratricopeptide repeat domain 26 [Source:VGNC Symbol;Acc:VGNC:36465]
ENSBTAG00000039946	69.896	1.11631	0.48994	2.27846	0.0226993	0.954383	ZNF814	zinc finger protein 814 [Source:NCBI gene;Acc:613566]
ENSBTAG00000007240	143.704	0.991244	0.436654	2.27009	0.0232021	0.954383	ZCCHC4	zinc finger CCHC-type containing 4 [Source:VGNC Symbol;Acc:VGNC:37120]
ENSBTAG00000010838	155.934	0.934075	0.410546	2.2752	0.0228939	0.954383	TMEM181	transmembrane protein 181 [Source:VGNC Symbol;Acc:VGNC:36007]
ENSBTAG00000016819	24025.6	0.58994	0.260159	2.26762	0.0233526	0.954383	FABP3	fatty acid binding protein 3 [Source:VGNC Symbol;Acc:VGNC:28697]
ENSBTAG00000030670	1083.91	0.542308	0.23839	2.27488	0.0229131	0.954383	PCNT	pericentrin [Source:VGNC Symbol;Acc:VGNC:32637]
ENSBTAG00000015758	1252.47	0.516148	0.226515	2.27865	0.022688	0.954383	USB1	U6 snRNA biogenesis phosphodiesterase 1 [Source:VGNC Symbol;Acc:VGNC:36703]
ENSBTAG00000012232	37476.6	0.337625	0.148056	2.28039	0.0225846	0.954383	CYC1	cytochrome c1 [Source:VGNC Symbol;Acc:VGNC:50266]
ENSBTAG00000037493	8238.72	0.200717	0.0883105	2.27286	0.0230346	0.954383	PUF60	poly(U) binding splicing factor 60 [Source:VGNC Symbol;Acc:VGNC:53878]
ENSBTAG00000048459	538.652	-0.542715	0.237544	-2.28469	0.022331	0.954383	CARHSP1	calcium regulated heat stable protein 1 [Source:NCBI gene;Acc:506760]
ENSBTAG00000000253	1457.57	-0.719366	0.315569	-2.27958	0.0226326	0.954383	PTPRF	protein tyrosine phosphatase receptor type F [Source:VGNC Symbol;Acc:VGNC:33550]
ENSBTAG00000006161	1107.05	-0.859417	0.376857	-2.28048	0.022579	0.954383	MET	MET proto-oncogene, receptor tyrosine kinase [Source:VGNC Symbol;Acc:VGNC:31394]
ENSBTAG00000010105	2017.6	-0.863623	0.380388	-2.27037	0.023185	0.954383	SLC35G1	solute carrier family 35 member G1 [Source:VGNC Symbol;Acc:VGNC:55969]
ENSBTAG00000055276	61.9813	-0.964764	0.422936	-2.28111	0.0225417	0.954383
ENSBTAG00000008958	348.09	-1.10952	0.489254	-2.26777	0.023343	0.954383	NSMAF	neutral sphingomyelinase activation associated factor [Source:VGNC Symbol;Acc:VGNC:32278]
ENSBTAG00000004884	112.521	-2.08298	0.918275	-2.26836	0.0233072	0.954383	SLC4A5	solute carrier family 4 member 5 [Source:VGNC Symbol;Acc:VGNC:34895]
ENSBTAG00000020914	71.0627	-2.12829	0.936691	-2.27213	0.0230786	0.954383	CPNE8	copine 8 [Source:VGNC Symbol;Acc:VGNC:27664]
ENSBTAG00000055295	13.0058	-7.32836	3.21851	-2.27694	0.0227899	0.954383
ENSBTAG00000018969	3548.42	0.457006	0.201637	2.26648	0.023422	0.955084	POLR1C	RNA polymerase I and III subunit C [Source:VGNC Symbol;Acc:VGNC:33133]
ENSBTAG00000007794	31.4322	-8.00441	3.53477	-2.26448	0.0235448	0.957958	KRT20	keratin 20 [Source:VGNC Symbol;Acc:VGNC:50399]
ENSBTAG00000004283	361.531	0.519502	0.229753	2.26114	0.0237508	0.959039	PPFIBP1	PPFIA binding protein 1 [Source:VGNC Symbol;Acc:VGNC:33193]
ENSBTAG00000007594	1306.14	0.435871	0.192703	2.26188	0.023705	0.959039	CWF19L1	CWF19 like cell cycle control factor 1 [Source:VGNC Symbol;Acc:VGNC:57313]
ENSBTAG00000020856	38.4502	-3.60474	1.59341	-2.26229	0.0236796	0.959039	HFM1	helicase for meiosis 1 [Source:VGNC Symbol;Acc:VGNC:29832]
ENSBTAG00000005968	13.9871	-4.96889	2.19799	-2.26065	0.0237809	0.959039	TLL1	tolloid like 1 [Source:VGNC Symbol;Acc:VGNC:35895]
ENSBTAG00000021283	12.9448	7.23521	3.21175	2.25273	0.024276	0.962489	KCNF1	potassium voltage-gated channel modifier subfamily F member 1 [Source:VGNC Symbol;Acc:VGNC:30441]
ENSBTAG00000011642	2107.33	0.436393	0.193266	2.25799	0.0239463	0.962489	RBM27	RNA binding motif protein 27 [Source:NCBI gene;Acc:516521]
ENSBTAG00000045931	4723.24	-0.489508	0.21722	-2.25352	0.0242266	0.962489	MAGT1	magnesium transporter 1 [Source:VGNC Symbol;Acc:VGNC:31149]
ENSBTAG00000025443	524.308	-0.518959	0.230386	-2.25256	0.0242869	0.962489	FNIP1	folliculin interacting protein 1 [Source:VGNC Symbol;Acc:VGNC:29068]
ENSBTAG00000019448	2476.66	-0.550151	0.244222	-2.25266	0.0242803	0.962489	CLDN7	claudin 7 [Source:VGNC Symbol;Acc:VGNC:55796]
ENSBTAG00000023377	125.361	-1.11133	0.492556	-2.25625	0.024055	0.962489	SH3BP5	SH3 domain binding protein 5 [Source:VGNC Symbol;Acc:VGNC:34568]
ENSBTAG00000009362	20.9738	-4.75195	2.10957	-2.25257	0.0242865	0.962489	SYNE1	spectrin repeat containing nuclear envelope protein 1 [Source:VGNC Symbol;Acc:VGNC:57362]
ENSBTAG00000015662	22.9135	-5.54485	2.45962	-2.25435	0.024174	0.962489	IMPG2	interphotoreceptor matrix proteoglycan 2 [Source:VGNC Symbol;Acc:VGNC:30190]
ENSBTAG00000006234	7.34789	-4.59043	2.03873	-2.25161	0.0243467	0.962774	NPR1	natriuretic peptide receptor 1 [Source:VGNC Symbol;Acc:VGNC:32213]
ENSBTAG00000019516	1408.09	-1.1836	0.526598	-2.24764	0.0245994	0.968583	COMT	catechol-O-methyltransferase [Source:NCBI gene;Acc:618278]
ENSBTAG00000007353	453.034	-1.31538	0.585056	-2.24829	0.0245575	0.968583	DLX4	distal-less homeobox 4 [Source:VGNC Symbol;Acc:VGNC:28100]
ENSBTAG00000003645	17.012	3.53667	1.61603	2.18849	0.0286342	0.973306	FSIP2	fibrous sheath interacting protein 2 [Source:VGNC Symbol;Acc:VGNC:56115]
ENSBTAG00000052382	31.1566	1.31017	0.599163	2.18667	0.0287664	0.973306	H2B	histone H2B-like [Source:NCBI gene;Acc:615043]
ENSBTAG00000047955	148.181	1.25992	0.56809	2.21782	0.0265674	0.973306	ZNF774	zinc finger protein 774 [Source:VGNC Symbol;Acc:VGNC:50169]
ENSBTAG00000005018	33.3764	1.04543	0.471768	2.21598	0.0266929	0.973306	NFAM1	NFAT activating protein with ITAM motif 1 [Source:VGNC Symbol;Acc:VGNC:32027]
ENSBTAG00000016996	617.963	0.878688	0.393534	2.23281	0.0255612	0.973306	C5H12orf54	chromosome 5 C12orf54 homolog [Source:VGNC Symbol;Acc:VGNC:55855]
ENSBTAG00000002345	127.008	0.847291	0.382072	2.21762	0.0265809	0.973306	SETD1A	SET domain containing 1A, histone lysine methyltransferase [Source:VGNC Symbol;Acc:VGNC:34492]
ENSBTAG00000021304	1353.63	0.794504	0.360937	2.20123	0.02772	0.973306	TP53BP1	tumor protein p53 binding protein 1 [Source:VGNC Symbol;Acc:VGNC:36232]
ENSBTAG00000031184	840.962	0.78894	0.352342	2.23913	0.0251473	0.973306	CDKN1C	cyclin dependent kinase inhibitor 1C [Source:VGNC Symbol;Acc:VGNC:27144]
ENSBTAG00000054812	130.902	0.732475	0.328835	2.22749	0.0259148	0.973306	H2BC11	histone cluster 1, H2bj [Source:NCBI gene;Acc:522960]
ENSBTAG00000048861	2171.95	0.674193	0.300927	2.24038	0.025066	0.973306		family with sequence similarity 151 member A [Source:NCBI gene;Acc:538670]
ENSBTAG00000052306	6614.7	0.629039	0.28585	2.20059	0.0277649	0.973306	IFITM3	interferon induced transmembrane protein 3 [Source:NCBI gene;Acc:777594]
ENSBTAG00000013329	467.382	0.598912	0.269266	2.22424	0.0261322	0.973306	AP1M1	adaptor related protein complex 1 subunit mu 1 [Source:VGNC Symbol;Acc:VGNC:25979]
ENSBTAG00000018116	1536.04	0.564878	0.255898	2.20743	0.027284	0.973306	MTFP1	mitochondrial fission process 1 [Source:VGNC Symbol;Acc:VGNC:31725]
ENSBTAG00000009366	15931.3	0.489737	0.222722	2.19888	0.0278868	0.973306	ARF5	ADP ribosylation factor 5 [Source:VGNC Symbol;Acc:VGNC:26060]
ENSBTAG00000010249	969.202	0.469526	0.21358	2.19836	0.0279234	0.973306	TMEM222	transmembrane protein 222 [Source:VGNC Symbol;Acc:VGNC:36043]
ENSBTAG00000013208	2316.5	0.44315	0.201027	2.20443	0.0274941	0.973306	SLC25A4	solute carrier family 25 member 4 [Source:VGNC Symbol;Acc:VGNC:34765]
ENSBTAG00000046192	1397.74	0.430042	0.194348	2.21274	0.0269158	0.973306	AK6	adenylate kinase 6 [Source:VGNC Symbol;Acc:VGNC:25775]
ENSBTAG00000037941	2042.96	0.422692	0.191829	2.20348	0.0275612	0.973306	QTRT1	queuine tRNA-ribosyltransferase catalytic subunit 1 [Source:VGNC Symbol;Acc:VGNC:33607]
ENSBTAG00000002050	1012.34	0.422068	0.191697	2.20174	0.0276837	0.973306	COA7	cytochrome c oxidase assembly factor 7 (putative) [Source:VGNC Symbol;Acc:VGNC:53859]
ENSBTAG00000006370	30593.4	0.42005	0.188047	2.23375	0.0254993	0.973306	CCT3	chaperonin containing TCP1 subunit 3 [Source:VGNC Symbol;Acc:VGNC:26996]
ENSBTAG00000014607	1989.1	0.409855	0.183951	2.22807	0.025876	0.973306	EXOSC4	exosome component 4 [Source:VGNC Symbol;Acc:VGNC:28659]
ENSBTAG00000001289	2349.94	0.396455	0.180175	2.20039	0.0277793	0.973306	MRPL18	mitochondrial ribosomal protein L18 [Source:VGNC Symbol;Acc:VGNC:31621]
ENSBTAG00000012788	8714.89	0.390797	0.178663	2.18734	0.0287179	0.973306	COX6A1	cytochrome c oxidase subunit VIa polypeptide 1 [Source:NCBI gene;Acc:282199]
ENSBTAG00000000608	3324.26	0.390181	0.174164	2.2403	0.0250715	0.973306	PRCC	proline rich mitotic checkpoint control factor [Source:VGNC Symbol;Acc:VGNC:56085]
ENSBTAG00000015920	4274.59	0.389491	0.177377	2.19583	0.0281039	0.973306	TMEM147	transmembrane protein 147 [Source:VGNC Symbol;Acc:VGNC:35978]
ENSBTAG00000002944	25735	0.387875	0.17602	2.20359	0.0275535	0.973306	ATP5MC3	ATP synthase membrane subunit c locus 3 [Source:NCBI gene;Acc:540176]
ENSBTAG00000006523	7728.91	0.385472	0.17183	2.24333	0.0248758	0.973306	SOD2	superoxide dismutase 2 [Source:NCBI gene;Acc:281496]
ENSBTAG00000015882	3188.12	0.351839	0.158325	2.22226	0.0262656	0.973306	UBE2J2	ubiquitin conjugating enzyme E2 J2 [Source:VGNC Symbol;Acc:VGNC:36586]
ENSBTAG00000004165	1817.23	0.347378	0.155735	2.23057	0.0257094	0.973306	CLYBL	citrate lyase beta like [Source:VGNC Symbol;Acc:VGNC:27475]
ENSBTAG00000012062	88774	0.333032	0.151878	2.19276	0.0283243	0.973306	PRDX2	peroxiredoxin 2 [Source:VGNC Symbol;Acc:VGNC:33300]
ENSBTAG00000000091	5324.91	0.331468	0.151278	2.19111	0.0284436	0.973306	NDUFB8	NADH:ubiquinone oxidoreductase subunit B8 [Source:NCBI gene;Acc:282517]
ENSBTAG00000005465	15560.3	0.329214	0.15034	2.1898	0.0285387	0.973306	NDUFA9	NADH:ubiquinone oxidoreductase subunit A9 [Source:VGNC Symbol;Acc:VGNC:56233]
ENSBTAG00000010552	6096.95	0.302065	0.137336	2.19945	0.0278458	0.973306	PSMG2	proteasome assembly chaperone 2 [Source:VGNC Symbol;Acc:VGNC:33479]
ENSBTAG00000017067	4857.23	0.280727	0.128161	2.19043	0.028493	0.973306	BUD23	BUD23 rRNA methyltransferase and ribosome maturation factor [Source:VGNC Symbol;Acc:VGNC:26608]
ENSBTAG00000008133	2663.48	0.268046	0.122124	2.19486	0.0281734	0.973306	ALKBH1	alkB homolog 1, histone H2A dioxygenase [Source:VGNC Symbol;Acc:VGNC:55101]
ENSBTAG00000015853	19767.2	0.256921	0.117006	2.19579	0.0281068	0.973306	SDHC	succinate dehydrogenase complex subunit C [Source:VGNC Symbol;Acc:VGNC:34392]
ENSBTAG00000024723	12612.3	0.250377	0.112385	2.22785	0.0258904	0.973306	CHCHD3	coiled-coil-helix-coiled-coil-helix domain containing 3 [Source:VGNC Symbol;Acc:VGNC:27272]
ENSBTAG00000007562	7630.46	-0.385647	0.172391	-2.23705	0.0252833	0.973306	TRAM1	translocation associated membrane protein 1 [Source:VGNC Symbol;Acc:VGNC:53882]
ENSBTAG00000014171	794.607	-0.453882	0.205914	-2.20423	0.0275079	0.973306	NAPEPLD	N-acyl phosphatidylethanolamine phospholipase D [Source:VGNC Symbol;Acc:VGNC:31883]
ENSBTAG00000019952	1844.26	-0.511505	0.230734	-2.21686	0.0266327	0.973306	ARMC8	armadillo repeat containing 8 [Source:VGNC Symbol;Acc:VGNC:26162]
ENSBTAG00000001105	1684.49	-0.536349	0.241786	-2.21828	0.0265356	0.973306	ANXA4	annexin A4 [Source:VGNC Symbol;Acc:VGNC:25966]
ENSBTAG00000014719	629.564	-0.540251	0.244431	-2.21024	0.0270884	0.973306	TMOD1	tropomodulin 1 [Source:VGNC Symbol;Acc:VGNC:36135]
ENSBTAG00000009523	1266.53	-0.69586	0.317494	-2.19173	0.028399	0.973306	SLC9A6	solute carrier family 9 member A6 [Source:VGNC Symbol;Acc:VGNC:34945]
ENSBTAG00000002287	1647.76	-0.723713	0.330402	-2.1904	0.0284953	0.973306	CHD9	chromodomain helicase DNA binding protein 9 [Source:VGNC Symbol;Acc:VGNC:27284]
ENSBTAG00000019700	4106.47	-0.798283	0.356438	-2.23961	0.0251163	0.973306	PC	pyruvate carboxylase [Source:VGNC Symbol;Acc:VGNC:56274]
ENSBTAG00000001932	656.931	-0.819291	0.367928	-2.22677	0.0259626	0.973306	CRAT	carnitine O-acetyltransferase [Source:VGNC Symbol;Acc:VGNC:27687]
ENSBTAG00000053443	566.133	-0.890167	0.403969	-2.20355	0.0275558	0.973306	RUM1	syncytin-Rum1 [Source:NCBI gene;Acc:104973909]
ENSBTAG00000001164	193.515	-0.914623	0.411329	-2.22358	0.0261769	0.973306	ACAD10	acyl-CoA dehydrogenase family, member 10 [Source:NCBI gene;Acc:511425]
ENSBTAG00000000831	809.535	-0.926681	0.413842	-2.23921	0.0251421	0.973306	CTNS	cystinosin, lysosomal cystine transporter [Source:VGNC Symbol;Acc:VGNC:27807]
ENSBTAG00000014458	223.533	-0.927518	0.416428	-2.22732	0.025926	0.973306	MROH1	maestro heat like repeat family member 1 [Source:VGNC Symbol;Acc:VGNC:31609]
ENSBTAG00000002082	608.508	-0.953512	0.425688	-2.23993	0.0250955	0.973306	MARCKS	myristoylated alanine rich protein kinase C substrate [Source:VGNC Symbol;Acc:VGNC:31244]
ENSBTAG00000001788	15070.7	-0.957236	0.437886	-2.18604	0.0288127	0.973306	PDPN	podoplanin [Source:VGNC Symbol;Acc:VGNC:50142]
ENSBTAG00000016577	757.78	-0.970705	0.440597	-2.20316	0.0275836	0.973306	AXIN1	axin 1 [Source:VGNC Symbol;Acc:VGNC:26364]
ENSBTAG00000044190	198.063	-1.14963	0.520907	-2.20697	0.0273162	0.973306	TMEM67	transmembrane protein 67 [Source:NCBI gene;Acc:506762]
ENSBTAG00000018248	205.839	-1.252	0.560199	-2.23492	0.0254224	0.973306	MGLL	monoglyceride lipase [Source:VGNC Symbol;Acc:VGNC:54454]
ENSBTAG00000018214	1283.28	-1.26145	0.573331	-2.2002	0.0277925	0.973306	SHISA2	shisa family member 2 [Source:VGNC Symbol;Acc:VGNC:34598]
ENSBTAG00000020600	409.081	-1.26244	0.56916	-2.21807	0.0265498	0.973306	RHOD	ras homolog family member D [Source:VGNC Symbol;Acc:VGNC:33947]
ENSBTAG00000020361	70.2355	-1.28145	0.582821	-2.19871	0.0278989	0.973306	SLC35F3	solute carrier family 35 member F3 [Source:VGNC Symbol;Acc:VGNC:34833]
ENSBTAG00000011397	165.433	-1.2998	0.584695	-2.22304	0.0262128	0.973306	UNC13B	unc-13 homolog B [Source:VGNC Symbol;Acc:VGNC:56987]
ENSBTAG00000004727	127.222	-1.39932	0.633709	-2.20815	0.027234	0.973306	PAQR4	progestin and adipoQ receptor family member 4 [Source:VGNC Symbol;Acc:VGNC:32576]
ENSBTAG00000022819	56.7223	-1.6031	0.72246	-2.21895	0.0264903	0.973306	ONECUT2	one cut homeobox 2 [Source:VGNC Symbol;Acc:VGNC:56369]
ENSBTAG00000047319	63.73	-1.63638	0.742473	-2.20397	0.0275268	0.973306
ENSBTAG00000011975	164.366	-1.79655	0.82093	-2.18844	0.0286378	0.973306	SERPINB1	serpin family B member 1 [Source:VGNC Symbol;Acc:VGNC:34470]
ENSBTAG00000003581	126.353	-1.92354	0.877864	-2.19116	0.02844	0.973306	SETD7	SET domain containing 7, histone lysine methyltransferase [Source:VGNC Symbol;Acc:VGNC:34497]
ENSBTAG00000011088	35.19	-2.22425	0.994419	-2.23673	0.0253039	0.973306	SLC6A6	solute carrier family 6 member 6 [Source:VGNC Symbol;Acc:VGNC:34922]
ENSBTAG00000010107	38.1477	-2.28353	1.04317	-2.18902	0.0285951	0.973306	WHRN	whirlin [Source:VGNC Symbol;Acc:VGNC:36937]
ENSBTAG00000015810	102.31	-2.9032	1.31042	-2.21548	0.0267275	0.973306	C15H11orf34	chromosome 15 open reading frame, human C11orf34 [Source:NCBI gene;Acc:505518]
ENSBTAG00000008593	4.50231	-3.1709	1.4468	-2.19167	0.0284036	0.973306	INCA1	inhibitor of CDK, cyclin A1 interacting protein 1 [Source:VGNC Symbol;Acc:VGNC:30193]
ENSBTAG00000006069	5.93526	-3.41156	1.54468	-2.20859	0.0272035	0.973306	CAPS	calcyphosine [Source:VGNC Symbol;Acc:VGNC:26753]
ENSBTAG00000023146	10.6866	-3.67648	1.64877	-2.22983	0.0257588	0.973306	ADAM32	ADAM metallopeptidase domain 32 [Source:VGNC Symbol;Acc:VGNC:25610]
ENSBTAG00000002081	12.3569	-4.20697	1.91309	-2.19904	0.0278749	0.973306	BMPR1B	bone morphogenetic protein receptor type 1B [Source:VGNC Symbol;Acc:VGNC:26525]
ENSBTAG00000011162	8.70265	-6.16606	2.81952	-2.18692	0.0287485	0.973306	ZKSCAN2	zinc finger with KRAB and SCAN domains 2 [Source:VGNC Symbol;Acc:VGNC:37189]
ENSBTAG00000006965	8.29169	-6.27744	2.84888	-2.20348	0.0275611	0.973306	NLRP8	NLR family pyrin domain containing 8 [Source:VGNC Symbol;Acc:VGNC:32120]
ENSBTAG00000038606	6.08985	-6.57618	2.97157	-2.21303	0.0268953	0.973306	DRD5	dopamine receptor D5 [Source:NCBI gene;Acc:526221]
ENSBTAG00000052808	6.23171	-6.60925	2.96627	-2.22813	0.0258716	0.973306		inactive serine/threonine-protein kinase TEX14-like [Source:NCBI gene;Acc:101904550]
ENSBTAG00000047968	12.2083	-7.1175	3.22005	-2.21037	0.0270794	0.973306
ENSBTAG00000001867	11.8043	-7.18013	3.23949	-2.21644	0.0266613	0.973306	SACS	sacsin molecular chaperone [Source:VGNC Symbol;Acc:VGNC:34260]
ENSBTAG00000013877	12.5613	7.11337	3.26498	2.17869	0.029355	0.976105	HORMAD2	HORMA domain containing 2 [Source:VGNC Symbol;Acc:VGNC:53905]
ENSBTAG00000020037	75.1729	1.48919	0.683704	2.17812	0.0293968	0.976105	CYB5RL	cytochrome b5 reductase-like [Source:NCBI gene;Acc:526748]
ENSBTAG00000015878	2780.21	0.456949	0.20993	2.17667	0.0295052	0.976105	RHNO1	RAD9-HUS1-RAD1 interacting nuclear orphan 1 [Source:VGNC Symbol;Acc:VGNC:33941]
ENSBTAG00000026971	919.281	0.456495	0.209431	2.17969	0.0292804	0.976105	CDCA5	cell division cycle associated 5 [Source:VGNC Symbol;Acc:VGNC:56261]
ENSBTAG00000013423	6723.07	0.404261	0.185544	2.17879	0.0293471	0.976105	GLRX5	glutaredoxin 5 [Source:VGNC Symbol;Acc:VGNC:29418]
ENSBTAG00000000064	8874.64	0.382577	0.175269	2.1828	0.0290504	0.976105	FEN1	flap structure-specific endonuclease 1 [Source:VGNC Symbol;Acc:VGNC:28947]
ENSBTAG00000001393	2207	0.318844	0.146499	2.17642	0.0295238	0.976105	MTF2	metal response element binding transcription factor 2 [Source:VGNC Symbol;Acc:VGNC:31723]
ENSBTAG00000032558	261.652	-0.830875	0.381169	-2.17981	0.0292718	0.976105	TTC7A	tetratricopeptide repeat domain 7A [Source:VGNC Symbol;Acc:VGNC:36480]
ENSBTAG00000002289	331.976	-1.69885	0.780626	-2.17627	0.0295353	0.976105	NLRP14	NLR family pyrin domain containing 14 [Source:VGNC Symbol;Acc:VGNC:32116]
ENSBTAG00000045880	7.29423	-3.25882	1.49562	-2.1789	0.0293391	0.976105		sialic acid binding Ig like lectin 5 [Source:NCBI gene;Acc:100300478]
ENSBTAG00000046503	22.8337	-3.62546	1.66009	-2.18389	0.0289703	0.976105	NCOA7	nuclear receptor coactivator 7 [Source:NCBI gene;Acc:541071]
ENSBTAG00000016685	9.38426	-6.24775	2.87055	-2.1765	0.0295176	0.976105	FMO4	flavin containing dimethylaniline monoxygenase 4 [Source:VGNC Symbol;Acc:VGNC:29052]
ENSBTAG00000001509	5.20395	-5.40843	2.48618	-2.1754	0.0296005	0.976497	ELK3	ETS transcription factor ELK3 [Source:VGNC Symbol;Acc:VGNC:28433]
ENSBTAG00000014102	6708.15	0.346743	0.159598	2.17261	0.0298097	0.98163	WDR77	WD repeat domain 77 [Source:VGNC Symbol;Acc:VGNC:36921]
ENSBTAG00000011734	27.1439	2.8134	1.29756	2.16823	0.0301413	0.984759	ANKRD1	ankyrin repeat domain 1 [Source:VGNC Symbol;Acc:VGNC:25908]
ENSBTAG00000052796	48.9665	1.4736	0.679546	2.16851	0.03012	0.984759		uncharacterized LOC614914 [Source:NCBI gene;Acc:614914]
ENSBTAG00000019295	38000.4	0.272756	0.125863	2.1671	0.0302275	0.984759	MDH1	malate dehydrogenase 1 [Source:VGNC Symbol;Acc:VGNC:31333]
ENSBTAG00000020726	277.91	-0.649967	0.299838	-2.16772	0.0301797	0.984759	ARHGEF7	Rho guanine nucleotide exchange factor 7 [Source:VGNC Symbol;Acc:VGNC:26121]
ENSBTAG00000013460	886.94	-0.697879	0.32186	-2.16827	0.0301382	0.984759	ZBTB11	zinc finger and BTB domain containing 11 [Source:VGNC Symbol;Acc:VGNC:37059]
ENSBTAG00000005570	5.83905	-6.51566	3.00367	-2.16923	0.030065	0.984759	WNT8A	Wnt family member 8A [Source:VGNC Symbol;Acc:VGNC:36964]
ENSBTAG00000039886	2422.22	0.361739	0.167382	2.16116	0.0306828	0.985709		transmembrane emp24 domain-containing protein 9 [Source:NCBI gene;Acc:509184]
ENSBTAG00000027173	25461.8	0.345569	0.159713	2.16369	0.0304881	0.985709	CHP1	calcineurin like EF-hand protein 1 [Source:VGNC Symbol;Acc:VGNC:27310]
ENSBTAG00000024450	4231.65	0.335204	0.155079	2.1615	0.0306564	0.985709	MAP2K2	mitogen-activated protein kinase kinase 2 [Source:VGNC Symbol;Acc:VGNC:55215]
ENSBTAG00000009372	1560.9	0.324022	0.149824	2.16268	0.0305657	0.985709	TTC5	tetratricopeptide repeat domain 5 [Source:VGNC Symbol;Acc:VGNC:36479]
ENSBTAG00000045937	1148.31	-0.322757	0.149056	-2.16534	0.0303617	0.985709
ENSBTAG00000038107	758.378	-0.617427	0.285522	-2.16245	0.0305836	0.985709	MAPKAPK2	MAPK activated protein kinase 2 [Source:VGNC Symbol;Acc:VGNC:54449]
ENSBTAG00000014372	12.9714	-3.1637	1.46393	-2.1611	0.0306873	0.985709	SMARCD3	SWI/SNF related, matrix associated, actin dependent regulator of chromatin, subfamily d, member 3 [Source:VGNC Symbol;Acc:VGNC:34995]
ENSBTAG00000000809	7.55433	-4.06561	1.87921	-2.16346	0.0305057	0.985709	IRX1	iroquois homeobox 1 [Source:VGNC Symbol;Acc:VGNC:30286]
ENSBTAG00000009019	9.32521	4.23408	1.96703	2.15252	0.0313563	0.989125	SH3PXD2B	SH3 and PX domains 2B [Source:VGNC Symbol;Acc:VGNC:34578]
ENSBTAG00000021515	8.90504	2.39661	1.11978	2.14024	0.0323352	0.989125	ZDHHC19	zinc finger DHHC-type containing 19 [Source:VGNC Symbol;Acc:VGNC:37134]
ENSBTAG00000020543	164.208	1.20398	0.559912	2.15031	0.0315311	0.989125	UPK1A	uroplakin 1A [Source:VGNC Symbol;Acc:VGNC:36684]
ENSBTAG00000013320	98.9324	1.00741	0.468888	2.1485	0.031674	0.989125	TSPAN1	tetraspanin 1 [Source:VGNC Symbol;Acc:VGNC:36425]
ENSBTAG00000002600	167.31	0.873262	0.4049	2.15674	0.0310263	0.989125	EFCAB7	EF-hand calcium binding domain 7 [Source:VGNC Symbol;Acc:VGNC:28347]
ENSBTAG00000014592	297.016	0.842383	0.391205	2.15331	0.0312947	0.989125	AFG1L	AFG1 like ATPase [Source:VGNC Symbol;Acc:VGNC:25713]
ENSBTAG00000023675	681.199	0.605896	0.28288	2.14188	0.0322031	0.989125	ZNF654	zinc finger protein 654 [Source:VGNC Symbol;Acc:VGNC:55090]
ENSBTAG00000014269	2734.51	0.580232	0.270131	2.14796	0.0317167	0.989125	SCARB1	scavenger receptor class B member 1 [Source:VGNC Symbol;Acc:VGNC:34324]
ENSBTAG00000003712	497.463	0.575456	0.268619	2.14227	0.0321715	0.989125	FAM89B	family with sequence similarity 89 member B [Source:VGNC Symbol;Acc:VGNC:28843]
ENSBTAG00000018413	4061.61	0.506578	0.235797	2.14836	0.031685	0.989125	TENT5B	terminal nucleotidyltransferase 5B [Source:VGNC Symbol;Acc:VGNC:28816]
ENSBTAG00000021374	4420.81	0.425864	0.198249	2.14813	0.0317038	0.989125	FARSA	phenylalanyl-tRNA synthetase subunit alpha [Source:VGNC Symbol;Acc:VGNC:28867]
ENSBTAG00000001449	2794.22	0.423829	0.197938	2.14122	0.0322561	0.989125	SRA1	steroid receptor RNA activator 1 [Source:VGNC Symbol;Acc:VGNC:35266]
ENSBTAG00000009415	2081.92	0.382999	0.178921	2.1406	0.0323065	0.989125	NUFIP1	nuclear FMR1 interacting protein 1 [Source:VGNC Symbol;Acc:VGNC:32345]
ENSBTAG00000013727	11403	0.193362	0.0902302	2.14298	0.0321147	0.989125	UMPS	uridine monophosphate synthetase [Source:VGNC Symbol;Acc:VGNC:36661]
ENSBTAG00000002795	2621.91	-0.3719	0.17254	-2.15544	0.0311271	0.989125	NKTR	natural killer cell triggering receptor [Source:VGNC Symbol;Acc:VGNC:32097]
ENSBTAG00000012497	1430.2	-0.397116	0.184902	-2.14771	0.0317367	0.989125	KHDRBS1	KH RNA binding domain containing, signal transduction associated 1 [Source:VGNC Symbol;Acc:VGNC:30540]
ENSBTAG00000045893	275.141	-0.698751	0.325477	-2.14685	0.0318053	0.989125	TIMM29	translocase of inner mitochondrial membrane 29 [Source:VGNC Symbol;Acc:VGNC:49576]
ENSBTAG00000014932	268.808	-0.765833	0.357877	-2.13993	0.0323604	0.989125	ARSE	arylsulfatase E [Source:VGNC Symbol;Acc:VGNC:55097]
ENSBTAG00000020947	404.018	-0.772609	0.359948	-2.14645	0.0318374	0.989125	RNF103	ring finger protein 103 [Source:VGNC Symbol;Acc:VGNC:34008]
ENSBTAG00000002939	219.834	-0.84082	0.391985	-2.14503	0.0319502	0.989125	FURIN	furin, paired basic amino acid cleaving enzyme [Source:VGNC Symbol;Acc:VGNC:29146]
ENSBTAG00000045985	99.8057	-0.973609	0.454015	-2.14444	0.0319974	0.989125
ENSBTAG00000047000	1325.39	-1.10613	0.515691	-2.14494	0.0319575	0.989125
ENSBTAG00000014005	187.274	-1.12991	0.526585	-2.14572	0.031895	0.989125	PPIP5K1	diphosphoinositol pentakisphosphate kinase 1 [Source:VGNC Symbol;Acc:VGNC:33206]
ENSBTAG00000011857	149.474	-1.17237	0.547567	-2.14106	0.0322692	0.989125	PPM1H	protein phosphatase, Mg2+/Mn2+ dependent 1H [Source:VGNC Symbol;Acc:VGNC:33214]
ENSBTAG00000003435	41.516	-1.18498	0.553113	-2.14238	0.0321631	0.989125	FAM189A1	family with sequence similarity 189 member A1 [Source:VGNC Symbol;Acc:VGNC:28770]
ENSBTAG00000017697	7.94921	-3.81769	1.78227	-2.14203	0.0321908	0.989125	CTF1	cardiotrophin 1 [Source:VGNC Symbol;Acc:VGNC:27793]
ENSBTAG00000000671	10.3828	-4.60368	2.13427	-2.15703	0.0310036	0.989125	PARP3	poly(ADP-ribose) polymerase family member 3 [Source:NCBI gene;Acc:507426]
ENSBTAG00000023918	18.5825	-4.83174	2.25337	-2.14423	0.0320148	0.989125
ENSBTAG00000018157	8.40631	-5.49735	2.55147	-2.15458	0.0311949	0.989125	IFT172	intraflagellar transport 172 [Source:VGNC Symbol;Acc:VGNC:30066]
ENSBTAG00000008227	918.735	0.518625	0.242673	2.13714	0.0325867	0.991554	LIPT2	lipoyl(octanoyl) transferase 2 [Source:VGNC Symbol;Acc:VGNC:54633]
ENSBTAG00000013602	2062.7	-0.54065	0.252897	-2.13783	0.0325308	0.991554	BRWD1	bromodomain and WD repeat domain containing 1 [Source:VGNC Symbol;Acc:VGNC:26575]
ENSBTAG00000016844	7.2325	-6.38932	2.98993	-2.13695	0.0326023	0.991554	ADGB	androglobin [Source:VGNC Symbol;Acc:VGNC:25656]
ENSBTAG00000014318	1055.36	-0.360114	0.168638	-2.13543	0.032726	0.993666	SLC33A1	solute carrier family 33 member 1 [Source:VGNC Symbol;Acc:VGNC:34816]
ENSBTAG00000012963	5.63701	6.42906	3.04486	2.11145	0.0347336	0.993814	VILL	villin like [Source:VGNC Symbol;Acc:VGNC:36795]
ENSBTAG00000009152	13.854	4.07543	1.91975	2.12289	0.0337627	0.993814	ZNF391	zinc finger protein 391 [Source:VGNC Symbol;Acc:VGNC:37265]
ENSBTAG00000049828	3.88134	3.19553	1.5041	2.12455	0.0336243	0.993814
ENSBTAG00000018946	7.64045	2.44617	1.15864	2.11125	0.0347512	0.993814	NIBAN3	niban apoptosis regulator 3 [Source:VGNC Symbol;Acc:VGNC:55221]
ENSBTAG00000010704	60.2997	2.27839	1.08901	2.09217	0.036423	0.993814	LRRC4	leucine rich repeat containing 4 [Source:VGNC Symbol;Acc:VGNC:31014]
ENSBTAG00000000496	107.037	1.35574	0.643711	2.10613	0.0351932	0.993814	SLC12A8	solute carrier family 12 member 8 [Source:VGNC Symbol;Acc:VGNC:34671]
ENSBTAG00000054538	24.1238	1.32205	0.622409	2.12408	0.0336634	0.993814
ENSBTAG00000049519	153.857	1.11062	0.530423	2.09383	0.0362749	0.993814	MOGAT2	monoacylglycerol O-acyltransferase 2 [Source:NCBI gene;Acc:407226]
ENSBTAG00000005710	218.962	0.753139	0.359387	2.09562	0.036116	0.993814	NCAM1	neural cell adhesion molecule 1 [Source:VGNC Symbol;Acc:VGNC:31898]
ENSBTAG00000020858	154.586	0.661023	0.312643	2.11431	0.0344891	0.993814	UPF3A	UPF3A regulator of nonsense mediated mRNA decay [Source:VGNC Symbol;Acc:VGNC:36682]
ENSBTAG00000006404	1309.98	0.60894	0.290504	2.09615	0.0360691	0.993814	CENPT	centromere protein T [Source:VGNC Symbol;Acc:VGNC:27185]
ENSBTAG00000007619	327.443	0.570594	0.270419	2.11004	0.034855	0.993814	PUSL1	pseudouridine synthase like 1 [Source:VGNC Symbol;Acc:VGNC:33578]
ENSBTAG00000015222	2988.94	0.548336	0.261267	2.09876	0.0358384	0.993814	RSRP1	arginine and serine rich protein 1 [Source:VGNC Symbol;Acc:VGNC:50105]
ENSBTAG00000003502	921.293	0.539101	0.255024	2.11392	0.0345217	0.993814	SPOCK1	SPARC (osteonectin), cwcv and kazal like domains proteoglycan 1 [Source:NCBI gene;Acc:511211]
ENSBTAG00000031340	10572.9	0.511353	0.242054	2.11256	0.0346384	0.993814	SLC6A20	solute carrier family 6 member 20 [Source:VGNC Symbol;Acc:VGNC:34921]
ENSBTAG00000017554	1900.66	0.496527	0.234746	2.11517	0.0344157	0.993814	RTN4IP1	reticulon 4 interacting protein 1 [Source:VGNC Symbol;Acc:VGNC:34205]
ENSBTAG00000013705	730.934	0.465648	0.222767	2.09029	0.0365915	0.993814	NFKBIE	NFKB inhibitor epsilon [Source:VGNC Symbol;Acc:VGNC:32048]
ENSBTAG00000007502	15010.3	0.428543	0.203082	2.1102	0.0348414	0.993814	CKMT1A	creatine kinase, mitochondrial 1A [Source:NCBI gene;Acc:281692]
ENSBTAG00000045617	505.519	0.387311	0.182038	2.12764	0.033367	0.993814	MTERF1	mitochondrial transcription termination factor 1 [Source:VGNC Symbol;Acc:VGNC:53661]
ENSBTAG00000012484	555.446	0.384515	0.182124	2.11129	0.0347478	0.993814	ENDOG	endonuclease G [Source:VGNC Symbol;Acc:VGNC:28491]
ENSBTAG00000019851	12760.2	0.343132	0.161784	2.12093	0.033928	0.993814	PPP2R1A	protein phosphatase 2 scaffold subunit Aalpha [Source:VGNC Symbol;Acc:VGNC:33253]
ENSBTAG00000003758	39505.5	0.340293	0.161597	2.10581	0.0352207	0.993814	TKT	transketolase [Source:VGNC Symbol;Acc:VGNC:58616]
ENSBTAG00000005181	1253.29	0.338566	0.160508	2.10934	0.0349154	0.993814	SYS1	SYS1 golgi trafficking protein [Source:NCBI gene;Acc:614236]
ENSBTAG00000006881	7862.08	0.332939	0.158965	2.09441	0.0362234	0.993814	SLC35B1	solute carrier family 35 member B1 [Source:VGNC Symbol;Acc:VGNC:34823]
ENSBTAG00000014840	4352.63	0.33094	0.15523	2.13193	0.0330125	0.993814	MTX1	metaxin 1 [Source:VGNC Symbol;Acc:VGNC:55630]
ENSBTAG00000018405	3523.7	0.32777	0.156099	2.09975	0.035751	0.993814	2001-03-01	methionyl-tRNA synthetase 1 [Source:VGNC Symbol;Acc:VGNC:31250]
ENSBTAG00000002282	33617.4	0.302395	0.142395	2.12364	0.0337004	0.993814	EIF1	eukaryotic translation initiation factor 1 [Source:VGNC Symbol;Acc:VGNC:57141]
ENSBTAG00000014700	3109.82	0.301083	0.141661	2.12537	0.0335559	0.993814	DYNC1LI1	dynein cytoplasmic 1 light intermediate chain 1 [Source:VGNC Symbol;Acc:VGNC:28272]
ENSBTAG00000004256	42705.6	0.300734	0.142796	2.10604	0.0352007	0.993814	ODC1	ornithine decarboxylase 1 [Source:NCBI gene;Acc:281365]
ENSBTAG00000002507	114789	0.277753	0.132828	2.09107	0.0365217	0.993814	ATP5F1A	ATP synthase F1 subunit alpha [Source:VGNC Symbol;Acc:VGNC:26299]
ENSBTAG00000037489	2959.31	0.270376	0.128957	2.09664	0.0360255	0.993814	CRCP	CGRP receptor component [Source:VGNC Symbol;Acc:VGNC:27691]
ENSBTAG00000021767	10412.6	0.255394	0.122172	2.09045	0.0365775	0.993814	UBE2N	ubiquitin conjugating enzyme E2 N [Source:VGNC Symbol;Acc:VGNC:36590]
ENSBTAG00000010790	23352	0.242009	0.115807	2.08976	0.0366391	0.993814	EIF3L	eukaryotic translation initiation factor 3 subunit L [Source:VGNC Symbol;Acc:VGNC:28402]
ENSBTAG00000009368	1151.94	-0.386128	0.184543	-2.09234	0.0364078	0.993814	RRAGC	Ras related GTP binding C [Source:VGNC Symbol;Acc:VGNC:34160]
ENSBTAG00000012464	638.05	-0.42657	0.200053	-2.13228	0.0329838	0.993814	AFAP1	actin filament associated protein 1 [Source:VGNC Symbol;Acc:VGNC:25706]
ENSBTAG00000016708	13747.4	-0.449016	0.21292	-2.10885	0.0349577	0.993814	CLTC	clathrin heavy chain [Source:VGNC Symbol;Acc:VGNC:27471]
ENSBTAG00000007402	1238.7	-0.500218	0.238661	-2.09593	0.0360884	0.993814	ZFAND2A	zinc finger AN1-type containing 2A [Source:VGNC Symbol;Acc:VGNC:37149]
ENSBTAG00000004278	1014.61	-0.512946	0.243757	-2.10433	0.0353497	0.993814	APMAP	adipocyte plasma membrane associated protein [Source:VGNC Symbol;Acc:VGNC:26021]
ENSBTAG00000000260	550.913	-0.570358	0.270488	-2.10862	0.0349772	0.993814	ZNRF2	zinc and ring finger 2 [Source:VGNC Symbol;Acc:VGNC:37364]
ENSBTAG00000000362	848.919	-0.570569	0.26952	-2.11699	0.0342611	0.993814	SPG11	SPG11 vesicle trafficking associated, spatacsin [Source:VGNC Symbol;Acc:VGNC:35207]
ENSBTAG00000030784	805.477	-0.571025	0.272434	-2.09601	0.0360809	0.993814	APPL2	adaptor protein, phosphotyrosine interacting with PH domain and leucine zipper 2 [Source:VGNC Symbol;Acc:VGNC:26041]
ENSBTAG00000031890	1029.94	-0.575498	0.27011	-2.13061	0.0331215	0.993814	DOCK1	dedicator of cytokinesis 1 [Source:VGNC Symbol;Acc:VGNC:28154]
ENSBTAG00000055158	708.966	-0.577768	0.275625	-2.09621	0.0360638	0.993814	TP53INP1	tumor protein p53 inducible nuclear protein 1 [Source:NCBI gene;Acc:782667]
ENSBTAG00000038428	606.741	-0.66408	0.314407	-2.11216	0.0346725	0.993814	RELB	RELB proto-oncogene, NF-kB subunit [Source:VGNC Symbol;Acc:VGNC:33859]
ENSBTAG00000038323	4114.62	-0.723858	0.339779	-2.13038	0.0331403	0.993814	GLYAT	glycine-N-acyltransferase [Source:NCBI gene;Acc:281787]
ENSBTAG00000018379	140.858	-0.740704	0.35176	-2.10571	0.0352295	0.993814	TMEM175	transmembrane protein 175 [Source:VGNC Symbol;Acc:VGNC:35999]
ENSBTAG00000016442	484.716	-0.822874	0.386682	-2.12804	0.0333339	0.993814	MAP4K3	mitogen-activated protein kinase kinase kinase kinase 3 [Source:VGNC Symbol;Acc:VGNC:31206]
ENSBTAG00000026676	172.632	-0.828448	0.396227	-2.09084	0.0365423	0.993814	SDC3	syndecan 3 [Source:VGNC Symbol;Acc:VGNC:34380]
ENSBTAG00000007834	163.232	-0.894882	0.426906	-2.0962	0.0360642	0.993814	PPP1R16A	protein phosphatase 1 regulatory subunit 16A [Source:VGNC Symbol;Acc:VGNC:33230]
ENSBTAG00000008525	201.354	-0.900519	0.422267	-2.13258	0.032959	0.993814	LRIG2	leucine rich repeats and immunoglobulin like domains 2 [Source:VGNC Symbol;Acc:VGNC:30983]
ENSBTAG00000020632	278.774	-0.915349	0.43417	-2.10827	0.0350073	0.993814	NQO1	NAD(P)H quinone dehydrogenase 1 [Source:VGNC Symbol;Acc:VGNC:57053]
ENSBTAG00000025434	118.541	-0.957055	0.449065	-2.13122	0.0330712	0.993814	ZFP36L1	ZFP36 ring finger protein like 1 [Source:VGNC Symbol;Acc:VGNC:37163]
ENSBTAG00000055207	3361.93	-0.998592	0.472353	-2.11408	0.0345086	0.993814	SCD	stearoyl-CoA desaturase [Source:NCBI gene;Acc:280924]
ENSBTAG00000049490	178.187	-1.02027	0.480951	-2.12136	0.0338914	0.993814
ENSBTAG00000015177	6038.47	-1.05822	0.503089	-2.10344	0.0354275	0.993814	PRSS23	serine protease 23 [Source:VGNC Symbol;Acc:VGNC:33416]
ENSBTAG00000004787	708.598	-1.07761	0.515488	-2.09047	0.0365752	0.993814	METRNL	meteorin like, glial cell differentiation regulator [Source:VGNC Symbol;Acc:VGNC:31399]
ENSBTAG00000027204	168.142	-1.07998	0.513313	-2.10395	0.035383	0.993814		T-cell receptor beta-1 chain C region [Source:NCBI gene;Acc:100300510]
ENSBTAG00000018082	33.4786	-1.28701	0.610378	-2.10855	0.0349836	0.993814	QPRT	quinolinate phosphoribosyltransferase [Source:NCBI gene;Acc:614254]
ENSBTAG00000024490	34.075	-1.33991	0.640899	-2.09068	0.0365572	0.993814
ENSBTAG00000014191	299.39	-1.39462	0.658596	-2.11757	0.0342116	0.993814	QSOX1	quiescin sulfhydryl oxidase 1 [Source:VGNC Symbol;Acc:VGNC:33605]
ENSBTAG00000050611	30.076	-1.49407	0.701563	-2.12964	0.0332017	0.993814
ENSBTAG00000015513	213.073	-1.66689	0.781541	-2.13282	0.0329395	0.993814	DOCK5	dedicator of cytokinesis 5 [Source:VGNC Symbol;Acc:VGNC:28159]
ENSBTAG00000014100	59.0608	-1.75524	0.827675	-2.12069	0.0339478	0.993814	BAIAP3	BAI1 associated protein 3 [Source:VGNC Symbol;Acc:VGNC:26415]
ENSBTAG00000032686	20.7865	-1.81866	0.865651	-2.10092	0.0356479	0.993814	HOMEZ	homeobox and leucine zipper encoding [Source:VGNC Symbol;Acc:VGNC:29904]
ENSBTAG00000018638	53.0409	-2.1408	1.01365	-2.11198	0.034688	0.993814	CC2D2A	coiled-coil and C2 domain containing 2A [Source:VGNC Symbol;Acc:VGNC:26826]
ENSBTAG00000047924	56.1355	-2.2927	1.09361	-2.09645	0.0360419	0.993814	MAB21L2	mab-21 like 2 [Source:VGNC Symbol;Acc:VGNC:31128]
ENSBTAG00000038149	12.5683	-2.46219	1.17768	-2.09071	0.0365539	0.993814	NLRP12	NLR family pyrin domain containing 12 [Source:VGNC Symbol;Acc:VGNC:52210]
ENSBTAG00000004799	19.0816	-2.52817	1.20337	-2.10091	0.0356493	0.993814	DENND2A	DENN domain containing 2A [Source:VGNC Symbol;Acc:VGNC:27995]
ENSBTAG00000018540	42.0173	-3.18673	1.50895	-2.11189	0.0346959	0.993814	NOX4	NADPH oxidase 4 [Source:VGNC Symbol;Acc:VGNC:32184]
ENSBTAG00000023369	6.96813	-4.51937	2.15892	-2.09335	0.036318	0.993814	GRIN2D	glutamate ionotropic receptor NMDA type subunit 2D [Source:VGNC Symbol;Acc:VGNC:29649]
ENSBTAG00000007496	16.0836	-5.06082	2.39807	-2.11037	0.0348261	0.993814	P2RX2	purinergic receptor P2X 2 [Source:VGNC Symbol;Acc:VGNC:32518]
ENSBTAG00000034332	10.5995	-7.37472	3.47789	-2.12046	0.0339674	0.993814		uncharacterized LOC511494 [Source:NCBI gene;Acc:511494]
ENSBTAG00000001374	726.846	0.5185	0.248227	2.08882	0.036724	0.994645	METTL27	methyltransferase like 27 [Source:VGNC Symbol;Acc:VGNC:31411]
ENSBTAG00000010008	386.142	-0.475837	0.227942	-2.08754	0.0368396	0.996302	TTC12	tetratricopeptide repeat domain 12 [Source:VGNC Symbol;Acc:VGNC:36454]
ENSBTAG00000007094	378.289	0.935133	0.448445	2.08528	0.0370441	0.996792	MINAR1	membrane integral NOTCH2 associated receptor 1 [Source:VGNC Symbol;Acc:VGNC:30561]
ENSBTAG00000013126	4272.2	0.463099	0.222297	2.08325	0.0372287	0.996792	EMG1	EMG1 N1-specific pseudouridine methyltransferase [Source:VGNC Symbol;Acc:VGNC:58013]
ENSBTAG00000007304	4408.38	0.327042	0.157122	2.08145	0.0373923	0.996792	CLK3	CDC like kinase 3 [Source:VGNC Symbol;Acc:VGNC:27450]
ENSBTAG00000012698	38288.6	0.23252	0.111542	2.08459	0.0371063	0.996792	HDAC1	histone deacetylase 1 [Source:VGNC Symbol;Acc:VGNC:49065]
ENSBTAG00000000613	3758.66	0.225835	0.108542	2.08061	0.0374694	0.996792	ELAVL1	ELAV like RNA binding protein 1 [Source:VGNC Symbol;Acc:VGNC:28424]
ENSBTAG00000039374	16495.3	-0.310514	0.149095	-2.08266	0.0372825	0.996792	IPO5	importin 5 [Source:VGNC Symbol;Acc:VGNC:30243]
ENSBTAG00000008109	6333.14	-0.409657	0.197189	-2.07749	0.0377567	0.996792	TMEM97	transmembrane protein 97 [Source:VGNC Symbol;Acc:VGNC:36129]
ENSBTAG00000019225	1721.53	-0.457379	0.220336	-2.07583	0.0379098	0.996792	SLC39A14	solute carrier family 39 member 14 [Source:VGNC Symbol;Acc:VGNC:34862]
ENSBTAG00000000720	18071.3	-0.484755	0.232513	-2.08485	0.0370828	0.996792	CTSL	cathepsin L [Source:NCBI gene;Acc:515200]
ENSBTAG00000052991	292.125	-0.547415	0.263247	-2.07948	0.0375737	0.996792
ENSBTAG00000016748	12211.3	-0.633849	0.304437	-2.08203	0.0373395	0.996792		intestinal alkaline phosphatase VII [Source:NCBI gene;Acc:516378]
ENSBTAG00000009902	23370.5	-0.700411	0.337355	-2.07618	0.0378771	0.996792	AKR1B1	aldo-keto reductase family 1, member B1 (aldose reductase) [Source:NCBI gene;Acc:317748]
ENSBTAG00000010642	317.005	-0.87134	0.419349	-2.07784	0.0377241	0.996792	ALKBH8	alkB homolog 8, tRNA methyltransferase [Source:VGNC Symbol;Acc:VGNC:25839]
ENSBTAG00000013856	228.398	-1.2223	0.587726	-2.07971	0.0375517	0.996792	SSBP2	single stranded DNA binding protein 2 [Source:VGNC Symbol;Acc:VGNC:50023]
ENSBTAG00000011580	426.089	-1.2715	0.612434	-2.07614	0.0378809	0.996792	DAG1	dystroglycan 1 [Source:VGNC Symbol;Acc:VGNC:27871]
ENSBTAG00000006208	49.4739	-1.40249	0.67576	-2.07543	0.0379466	0.996792	ADCY7	adenylate cyclase 7 [Source:VGNC Symbol;Acc:VGNC:25648]
ENSBTAG00000010579	90.4811	-2.75431	1.3271	-2.07544	0.0379456	0.996792	ACADL	acyl-CoA dehydrogenase long chain [Source:VGNC Symbol;Acc:VGNC:25523]
ENSBTAG00000000838	11.9186	-4.38263	2.10917	-2.07789	0.0377196	0.996792	CCDC88C	coiled-coil domain containing 88C [Source:VGNC Symbol;Acc:VGNC:55038]
ENSBTAG00000016523	9.59665	-4.81058	2.31443	-2.07852	0.0376615	0.996792	DNAH10	dynein axonemal heavy chain 10 [Source:VGNC Symbol;Acc:VGNC:28123]
ENSBTAG00000047213	9.06605	-6.02751	2.88965	-2.0859	0.036988	0.996792		G protein-coupled receptor associated sorting protein 1 [Source:NCBI gene;Acc:112441497]
ENSBTAG00000025617	29580.4	0.342218	0.164947	2.07471	0.0380131	0.997107	RPS4Y1	ribosomal protein S4, Y-linked 1 [Source:NCBI gene;Acc:286873]
ENSBTAG00000012266	45.477	1.51546	0.730973	2.07321	0.0381529	0.997915
ENSBTAG00000008134	1041.59	-0.572122	0.275895	-2.0737	0.0381074	0.997915	BDNF	brain derived neurotrophic factor [Source:VGNC Symbol;Acc:VGNC:26461]
ENSBTAG00000009966	177.457	0.762657	0.368027	2.07229	0.0382386	0.99873	XRCC3	X-ray repair cross complementing 3 [Source:VGNC Symbol;Acc:VGNC:37004]
ENSBTAG00000031377	8.21851	6.80847	3.31585	2.05331	0.0400423	1	SYCP2L	synaptonemal complex protein 2 like [Source:VGNC Symbol;Acc:VGNC:54239]
ENSBTAG00000013688	6.64243	6.60113	3.34129	1.97562	0.0481974	1	PGF	placental growth factor [Source:VGNC Symbol;Acc:VGNC:32787]
ENSBTAG00000008684	10.5498	6.56668	3.32986	1.97206	0.0486029	1		RING finger protein 113A [Source:NCBI gene;Acc:518027]
ENSBTAG00000047586	9.99609	6.52593	3.3249	1.96275	0.0496757	1	NPY1R	neuropeptide Y receptor Y1 [Source:VGNC Symbol;Acc:VGNC:32223]
ENSBTAG00000017679	7.67764	5.78265	2.85397	2.02618	0.0427467	1	PAK5	p21 (RAC1) activated kinase 5 [Source:NCBI gene;Acc:513432]
ENSBTAG00000005404	2.97357	5.36093	2.60366	2.059	0.0394945	1	MSC	musculin [Source:VGNC Symbol;Acc:VGNC:31691]
ENSBTAG00000000755	3.63793	4.5865	2.25217	2.03648	0.0417026	1	ZFR2	zinc finger RNA binding protein 2 [Source:VGNC Symbol;Acc:VGNC:37172]
ENSBTAG00000007651	24.1395	3.81341	1.86896	2.04039	0.0413116	1	TARS3	threonyl-tRNA synthetase 3 [Source:VGNC Symbol;Acc:VGNC:35606]
ENSBTAG00000045523	15.748	3.53829	1.7913	1.97527	0.0482379	1
ENSBTAG00000009707	4.97953	3.36881	1.69228	1.99069	0.0465149	1	MYL1	myosin light chain 1 [Source:VGNC Symbol;Acc:VGNC:31799]
ENSBTAG00000039664	25.3387	2.79215	1.35357	2.06281	0.0391308	1
ENSBTAG00000031647	9.75122	2.62588	1.32854	1.97652	0.0480956	1	LRG1	leucine rich alpha-2-glycoprotein 1 [Source:VGNC Symbol;Acc:VGNC:30980]
ENSBTAG00000040167	8.53493	2.37052	1.20768	1.96286	0.049662	1
ENSBTAG00000049493	32.1286	2.31644	1.14148	2.02934	0.0424239	1		protocadherin beta-4-like [Source:NCBI gene;Acc:104968820]
ENSBTAG00000054345	61.3945	2.30728	1.16068	1.98787	0.0468255	1		melanoma-associated antigen B4 [Source:NCBI gene;Acc:789863]
ENSBTAG00000049898	14.911	1.78003	0.889509	2.00114	0.045377	1
ENSBTAG00000012785	17.7413	1.73199	0.865934	2.00014	0.045485	1	TEPP	testis, prostate and placenta expressed [Source:VGNC Symbol;Acc:VGNC:35746]
ENSBTAG00000020213	19.6844	1.69237	0.84055	2.01341	0.0440717	1	NIPAL4	NIPA like domain containing 4 [Source:VGNC Symbol;Acc:VGNC:32084]
ENSBTAG00000024157	85.698	1.38493	0.688754	2.01077	0.0443492	1	WDR60	WD repeat domain 60 [Source:VGNC Symbol;Acc:VGNC:36909]
ENSBTAG00000053071	357.064	1.35237	0.664991	2.03366	0.0419854	1
ENSBTAG00000053794	216.006	1.04036	0.51766	2.00974	0.0444588	1
ENSBTAG00000030836	108.782	1.00052	0.505915	1.97764	0.0479693	1	ZBTB21	zinc finger and BTB domain containing 21 [Source:VGNC Symbol;Acc:VGNC:37066]
ENSBTAG00000005967	468.025	0.956767	0.485614	1.97022	0.0488131	1	UBR2	ubiquitin protein ligase E3 component n-recognin 2 [Source:VGNC Symbol;Acc:VGNC:36617]
ENSBTAG00000021731	262.885	0.859824	0.435835	1.97282	0.048516	1	TGFBRAP1	transforming growth factor beta receptor associated protein 1 [Source:VGNC Symbol;Acc:VGNC:35806]
ENSBTAG00000014289	319.115	0.845706	0.431219	1.9612	0.049856	1	ZFYVE9	zinc finger FYVE-type containing 9 [Source:VGNC Symbol;Acc:VGNC:37179]
ENSBTAG00000031433	237.281	0.748762	0.367972	2.03483	0.0418676	1	TEX9	testis expressed 9 [Source:VGNC Symbol;Acc:VGNC:35774]
ENSBTAG00000039512	259.284	0.743573	0.360604	2.06202	0.0392058	1	ZSCAN25	zinc finger and SCAN domain containing 25 [Source:HGNC Symbol;Acc:HGNC:21961]
ENSBTAG00000006738	503.181	0.738811	0.369893	1.99736	0.0457857	1	GPR68	G protein-coupled receptor 68 [Source:VGNC Symbol;Acc:VGNC:29597]
ENSBTAG00000015848	457.49	0.738759	0.360113	2.05147	0.0402217	1	PHKA1	phosphorylase kinase regulatory subunit alpha 1 [Source:VGNC Symbol;Acc:VGNC:32830]
ENSBTAG00000008766	120.878	0.703851	0.350143	2.01018	0.0444123	1	SLC9A1	solute carrier family 9 member A1 [Source:NCBI gene;Acc:317654]
ENSBTAG00000052397	9065.45	0.665713	0.326997	2.03584	0.0417666	1		interleukin 32-like [Source:NCBI gene;Acc:100139916]
ENSBTAG00000051211	191.264	0.621213	0.307469	2.02041	0.0433405	1	DUSP8	dual specificity phosphatase 8 [Source:NCBI gene;Acc:615727]
ENSBTAG00000015148	1215.86	0.603638	0.303164	1.99113	0.046467	1	METTL3	methyltransferase like 3 [Source:VGNC Symbol;Acc:VGNC:31412]
ENSBTAG00000019585	1865.95	0.601872	0.303947	1.98019	0.0476824	1	MYOM1	myomesin 1 [Source:VGNC Symbol;Acc:VGNC:50225]
ENSBTAG00000012408	1122.83	0.597732	0.292747	2.0418	0.0411712	1	RAB27A	RAB27A, member RAS oncogene family [Source:NCBI gene;Acc:618035]
ENSBTAG00000003600	633.329	0.597096	0.297646	2.00606	0.0448496	1	CAPN8	calpain 8 [Source:VGNC Symbol;Acc:VGNC:50012]
ENSBTAG00000020446	868.73	0.580139	0.291173	1.99242	0.0463252	1	THOP1	thimet oligopeptidase 1 [Source:VGNC Symbol;Acc:VGNC:35843]
ENSBTAG00000022489	5300.85	0.546049	0.270127	2.02145	0.0432328	1		E3 ubiquitin-protein ligase RNF213 [Source:NCBI gene;Acc:509283]
ENSBTAG00000003550	1725.85	0.537344	0.269162	1.99636	0.0458945	1	C29H11orf54	chromosome 29 C11orf54 homolog [Source:VGNC Symbol;Acc:VGNC:52699]
ENSBTAG00000003927	3453.43	0.525687	0.267073	1.96833	0.0490303	1	AAMP	angio associated migratory cell protein [Source:VGNC Symbol;Acc:VGNC:25445]
ENSBTAG00000000545	2113.19	0.509288	0.251203	2.0274	0.0426218	1	PPP4R3B	protein phosphatase 4 regulatory subunit 3B [Source:VGNC Symbol;Acc:VGNC:58608]
ENSBTAG00000005195	1220.9	0.502319	0.254318	1.97516	0.0482504	1	ZNF200	zinc finger protein 200 [Source:VGNC Symbol;Acc:VGNC:37222]
ENSBTAG00000001425	709.402	0.458995	0.231489	1.98279	0.047391	1	FBXO11	F-box protein 11 [Source:VGNC Symbol;Acc:VGNC:28892]
ENSBTAG00000019419	4609.61	0.453802	0.226038	2.00764	0.0446818	1	NDUFS7	NADH:ubiquinone oxidoreductase core subunit S7 [Source:VGNC Symbol;Acc:VGNC:31972]
ENSBTAG00000009988	4128.19	0.453179	0.220108	2.0589	0.0395042	1	SMARCB1	SWI/SNF related, matrix associated, actin dependent regulator of chromatin, subfamily b, member 1 [Source:VGNC Symbol;Acc:VGNC:34991]
ENSBTAG00000002866	22643.2	0.428511	0.208541	2.0548	0.0398984	1	RPIA	ribose 5-phosphate isomerase A [Source:VGNC Symbol;Acc:VGNC:34107]
ENSBTAG00000013929	4617.96	0.414479	0.204831	2.02352	0.0430199	1	RRAD	RRAD, Ras related glycolysis inhibitor and calcium channel regulator [Source:VGNC Symbol;Acc:VGNC:34158]
ENSBTAG00000013569	4972.38	0.396267	0.194845	2.03376	0.0419761	1	CD38	CD38 molecule [Source:VGNC Symbol;Acc:VGNC:27027]
ENSBTAG00000010602	5123.69	0.387819	0.190431	2.03653	0.0416972	1	DDX56	DEAD-box helicase 56 [Source:VGNC Symbol;Acc:VGNC:27978]
ENSBTAG00000000492	5212.31	0.385363	0.188113	2.04857	0.0405041	1	ASNSD1	asparagine synthetase domain containing 1 [Source:VGNC Symbol;Acc:VGNC:26216]
ENSBTAG00000053873	2120.8	0.370616	0.18176	2.03904	0.0414463	1	RRP36	ribosomal RNA processing 36 [Source:NCBI gene;Acc:100125879]
ENSBTAG00000004783	1118.87	0.366649	0.183527	1.99779	0.0457392	1	CORO1B	coronin 1B [Source:VGNC Symbol;Acc:VGNC:27621]
ENSBTAG00000003314	2022.52	0.363089	0.178665	2.03223	0.0421304	1	SKA3	spindle and kinetochore associated complex subunit 3 [Source:VGNC Symbol;Acc:VGNC:34645]
ENSBTAG00000006721	3492.38	0.359606	0.17542	2.04997	0.0403673	1	TWISTNB	TWIST neighbor [Source:VGNC Symbol;Acc:VGNC:53681]
ENSBTAG00000016164	8185	0.358837	0.180807	1.98464	0.0471846	1	LMBRD1	LMBR1 domain containing 1 [Source:VGNC Symbol;Acc:VGNC:30924]
ENSBTAG00000015051	522.583	0.354388	0.175216	2.02258	0.0431165	1	POLRMT	RNA polymerase mitochondrial [Source:VGNC Symbol;Acc:VGNC:33154]
ENSBTAG00000010373	573.282	0.351605	0.177211	1.98411	0.0472441	1	CACTIN	cactin, spliceosome C complex subunit [Source:VGNC Symbol;Acc:VGNC:58364]
ENSBTAG00000021785	1500.8	0.350027	0.176562	1.98246	0.0474275	1	TMEM219	transmembrane protein 219 [Source:VGNC Symbol;Acc:VGNC:36041]
ENSBTAG00000011855	3715.69	0.349602	0.170113	2.05512	0.039867	1	EXOSC8	exosome component 8 [Source:VGNC Symbol;Acc:VGNC:28662]
ENSBTAG00000013240	15147.9	0.345711	0.172311	2.00632	0.0448224	1	SLC3A2	solute carrier family 3 member 2 [Source:VGNC Symbol;Acc:VGNC:34871]
ENSBTAG00000019901	5809.76	0.331717	0.162297	2.04389	0.0409642	1	RAD54L	RAD54 like [Source:VGNC Symbol;Acc:VGNC:49567]
ENSBTAG00000007620	4750.67	0.331364	0.168905	1.96183	0.0497818	1	INTS11	integrator complex subunit 11 [Source:NCBI gene;Acc:522378]
ENSBTAG00000003328	1330.95	0.329574	0.160592	2.05225	0.0401458	1	TAMM41	TAM41 mitochondrial translocator assembly and maintenance homolog [Source:NCBI gene;Acc:514330]
ENSBTAG00000014850	2349.98	0.327687	0.16	2.04804	0.0405565	1	GPN2	GPN-loop GTPase 2 [Source:VGNC Symbol;Acc:VGNC:29539]
ENSBTAG00000018667	5377.86	0.323802	0.162636	1.99096	0.0464849	1	RCL1	RNA terminal phosphate cyclase like 1 [Source:VGNC Symbol;Acc:VGNC:33830]
ENSBTAG00000005744	1948.72	0.320987	0.162582	1.97431	0.0483465	1	COQ2	coenzyme Q2, polyprenyltransferase [Source:VGNC Symbol;Acc:VGNC:27611]
ENSBTAG00000001872	3069.54	0.304304	0.149603	2.03408	0.0419438	1	ORC6	origin recognition complex subunit 6 [Source:VGNC Symbol;Acc:VGNC:32451]
ENSBTAG00000008024	4278.37	0.304245	0.148106	2.05423	0.0399531	1	UCHL3	ubiquitin C-terminal hydrolase L3 [Source:VGNC Symbol;Acc:VGNC:36632]
ENSBTAG00000019534	3374.62	0.303413	0.153533	1.97621	0.0481312	1	TRNT1	tRNA nucleotidyl transferase 1 [Source:VGNC Symbol;Acc:VGNC:36377]
ENSBTAG00000032964	2239.53	0.296879	0.14482	2.04999	0.0403657	1	C24H18orf25	chromosome 24 C18orf25 homolog [Source:NCBI gene;Acc:615069]
ENSBTAG00000018813	13293	0.294437	0.142517	2.06597	0.0388314	1	IDH3B	isocitrate dehydrogenase (NAD(+)) 3 non-catalytic subunit beta [Source:NCBI gene;Acc:613338]
ENSBTAG00000012752	5596.13	0.290189	0.141612	2.04919	0.0404435	1	MRPL2	mitochondrial ribosomal protein L2 [Source:VGNC Symbol;Acc:VGNC:31623]
ENSBTAG00000010207	3516.27	0.289283	0.145914	1.98256	0.0474168	1	NUDT21	nudix hydrolase 21 [Source:VGNC Symbol;Acc:VGNC:32336]
ENSBTAG00000047747	9450.25	0.273458	0.135852	2.01291	0.044124	1	NDFIP1	Nedd4 family interacting protein 1 [Source:VGNC Symbol;Acc:VGNC:31934]
ENSBTAG00000004996	1634.62	0.256996	0.124422	2.06551	0.0388744	1	ABITRAM	actin binding transcription modulator [Source:VGNC Symbol;Acc:VGNC:28781]
ENSBTAG00000006423	4062.15	0.249672	0.12315	2.02738	0.0426234	1	PHF5A	PHD finger protein 5A [Source:VGNC Symbol;Acc:VGNC:32826]
ENSBTAG00000011694	9214.85	0.245834	0.122758	2.00259	0.0452216	1	TIMM23	translocase of inner mitochondrial membrane 23 homolog (yeast) [Source:NCBI gene;Acc:509841]
ENSBTAG00000001182	10950.1	-0.256312	0.124456	-2.05946	0.0394499	1	SEPTIN7	septin 7 [Source:VGNC Symbol;Acc:VGNC:53670]
ENSBTAG00000010275	2797.75	-0.261088	0.129177	-2.02117	0.0432626	1	WASHC5	WASH complex subunit 5 [Source:VGNC Symbol;Acc:VGNC:36869]
ENSBTAG00000019794	1646.29	-0.324728	0.165326	-1.96417	0.0495102	1	SYPL1	synaptophysin like 1 [Source:VGNC Symbol;Acc:VGNC:53679]
ENSBTAG00000017533	4637.2	-0.333737	0.166981	-1.99865	0.0456459	1	LRRC1	leucine rich repeat containing 1 [Source:VGNC Symbol;Acc:VGNC:30998]
ENSBTAG00000001269	2226.67	-0.344583	0.169651	-2.03113	0.0422416	1	TMEM165	transmembrane protein 165 [Source:VGNC Symbol;Acc:VGNC:35990]
ENSBTAG00000002331	4461.22	-0.372245	0.187613	-1.98411	0.0472439	1	DLGAP5	DLG associated protein 5 [Source:VGNC Symbol;Acc:VGNC:28091]
ENSBTAG00000021250	1463.23	-0.39971	0.201619	-1.9825	0.047423	1	RALBP1	ralA binding protein 1 [Source:VGNC Symbol;Acc:VGNC:33700]
ENSBTAG00000003359	1000.75	-0.424359	0.215926	-1.9653	0.0493793	1	ELOVL5	ELOVL fatty acid elongase 5 [Source:VGNC Symbol;Acc:VGNC:28451]
ENSBTAG00000010919	2894.28	-0.446381	0.219306	-2.03542	0.0418084	1	USP47	ubiquitin specific peptidase 47 [Source:VGNC Symbol;Acc:VGNC:36732]
ENSBTAG00000011256	5754.43	-0.461854	0.229798	-2.00982	0.0444499	1	MYO1B	myosin IB [Source:VGNC Symbol;Acc:VGNC:31817]
ENSBTAG00000013784	496.447	-0.513563	0.25571	-2.00838	0.0446028	1	CSNK2A2	casein kinase 2 alpha 2 [Source:VGNC Symbol;Acc:VGNC:27769]
ENSBTAG00000044000	503.077	-0.51556	0.258068	-1.99777	0.0457417	1	PRIM1	DNA primase subunit 1 [Source:VGNC Symbol;Acc:VGNC:49067]
ENSBTAG00000011859	731.052	-0.534643	0.260366	-2.05343	0.0400311	1	IPPK	inositol-pentakisphosphate 2-kinase [Source:VGNC Symbol;Acc:VGNC:56974]
ENSBTAG00000006770	1054.41	-0.542683	0.263421	-2.06013	0.0393858	1	MTBP	MDM2 binding protein [Source:VGNC Symbol;Acc:VGNC:31716]
ENSBTAG00000003705	799.829	-0.546186	0.27426	-1.99149	0.0464273	1	FAM83G	family with sequence similarity 83 member G [Source:VGNC Symbol;Acc:VGNC:28838]
ENSBTAG00000054039	94.3532	-0.549316	0.267043	-2.05703	0.0396834	1
ENSBTAG00000033642	1220.6	-0.569889	0.290671	-1.9606	0.049926	1
ENSBTAG00000031950	1585.65	-0.572916	0.279336	-2.05099	0.0402677	1	RAB3IP	RAB3A interacting protein [Source:VGNC Symbol;Acc:VGNC:56227]
ENSBTAG00000021558	195.721	-0.57885	0.285417	-2.02808	0.042552	1	LSM14B	LSM family member 14B [Source:NCBI gene;Acc:529294]
ENSBTAG00000003033	325.824	-0.584521	0.29147	-2.00542	0.0449181	1	GADD45G	growth arrest and DNA damage inducible gamma [Source:VGNC Symbol;Acc:VGNC:29208]
ENSBTAG00000019552	5966.98	-0.586945	0.288721	-2.03291	0.0420616	1	PGRMC1	progesterone receptor membrane component 1 [Source:VGNC Symbol;Acc:VGNC:32801]
ENSBTAG00000021105	568.888	-0.625937	0.312499	-2.003	0.045177	1	IRAK4	interleukin 1 receptor associated kinase 4 [Source:VGNC Symbol;Acc:VGNC:30268]
ENSBTAG00000008053	570.902	-0.634541	0.31733	-1.99962	0.0455409	1	WDFY2	WD repeat and FYVE domain containing 2 [Source:VGNC Symbol;Acc:VGNC:53847]
ENSBTAG00000053677	489.608	-0.638999	0.310036	-2.06105	0.0392985	1	HERC1	HECT and RLD domain containing E3 ubiquitin protein ligase family member 1 [Source:NCBI gene;Acc:538029]
ENSBTAG00000018292	494.893	-0.655991	0.328176	-1.9989	0.0456195	1	MOSPD2	motile sperm domain containing 2 [Source:NCBI gene;Acc:508293]
ENSBTAG00000018784	4111.35	-0.676953	0.328317	-2.06189	0.0392182	1	CTSZ	cathepsin Z [Source:VGNC Symbol;Acc:VGNC:27820]
ENSBTAG00000046612	1978.3	-0.689311	0.341256	-2.01992	0.0433915	1	ZNF292	zinc finger protein 292 [Source:VGNC Symbol;Acc:VGNC:37239]
ENSBTAG00000001508	169.041	-0.72894	0.351994	-2.07089	0.0383694	1	SH3RF1	SH3 domain containing ring finger 1 [Source:VGNC Symbol;Acc:VGNC:34579]
ENSBTAG00000004552	372.091	-0.733854	0.367097	-1.99908	0.0456002	1	PBXIP1	PBX homeobox interacting protein 1 [Source:VGNC Symbol;Acc:VGNC:32611]
ENSBTAG00000007112	83.5988	-0.736728	0.364613	-2.02058	0.0433237	1	HSPB11	heat shock protein family B (small) member 11 [Source:VGNC Symbol;Acc:VGNC:55237]
ENSBTAG00000011779	435.446	-0.746197	0.380564	-1.96077	0.0499064	1	MAL2	mal, T cell differentiation protein 2 [Source:VGNC Symbol;Acc:VGNC:54901]
ENSBTAG00000009471	440.858	-0.766546	0.381407	-2.00979	0.0444538	1	CEP135	centrosomal protein 135 [Source:VGNC Symbol;Acc:VGNC:27193]
ENSBTAG00000004440	689.674	-0.768933	0.383639	-2.00432	0.0450363	1	SLC15A1	solute carrier family 15 member 1 [Source:VGNC Symbol;Acc:VGNC:34679]
ENSBTAG00000053965	230.743	-0.770207	0.379628	-2.02885	0.0424737	1
ENSBTAG00000039819	83.3244	-0.791303	0.393218	-2.01238	0.0441803	1	RPH3AL	rabphilin 3A like (without C2 domains) [Source:NCBI gene;Acc:617294]
ENSBTAG00000021830	1452.41	-0.81025	0.400521	-2.02299	0.0430744	1	ENPP1	ectonucleotide pyrophosphatase/phosphodiesterase 1 [Source:VGNC Symbol;Acc:VGNC:28504]
ENSBTAG00000009694	587.481	-0.816141	0.401031	-2.03511	0.0418403	1	PUS10	pseudouridine synthase 10 [Source:VGNC Symbol;Acc:VGNC:33575]
ENSBTAG00000015974	351.34	-0.849541	0.429156	-1.97956	0.0477526	1	FLVCR1	feline leukemia virus subgroup C cellular receptor 1 [Source:NCBI gene;Acc:533317]
ENSBTAG00000039316	304.786	-0.87161	0.440657	-1.97798	0.0479311	1	ZNF268	zinc finger protein 268 [Source:HGNC Symbol;Acc:HGNC:13061]
ENSBTAG00000003857	158.545	-0.888147	0.449891	-1.97414	0.048366	1	SUSD6	sushi domain containing 6 [Source:VGNC Symbol;Acc:VGNC:35490]
ENSBTAG00000009770	639.193	-0.895602	0.449889	-1.99072	0.0465121	1	GPD2	glycerol-3-phosphate dehydrogenase 2 [Source:VGNC Symbol;Acc:VGNC:29531]
ENSBTAG00000024715	1827.63	-0.900289	0.435938	-2.06518	0.0389061	1	PTPRJ	protein tyrosine phosphatase receptor type J [Source:NCBI gene;Acc:508150]
ENSBTAG00000038962	214.767	-0.931716	0.465145	-2.00307	0.0451703	1	SLC6A11	solute carrier family 6 member 11 [Source:VGNC Symbol;Acc:VGNC:34914]
ENSBTAG00000016243	306.658	-0.953836	0.479519	-1.98915	0.0466845	1	RBL2	RB transcriptional corepressor like 2 [Source:VGNC Symbol;Acc:VGNC:33782]
ENSBTAG00000025161	221.21	-0.96014	0.473416	-2.02811	0.0425489	1	AGPAT2	1-acylglycerol-3-phosphate O-acyltransferase 2 [Source:VGNC Symbol;Acc:VGNC:25735]
ENSBTAG00000054721	29.518	-0.967161	0.471938	-2.04934	0.0404288	1
ENSBTAG00000000243	380.579	-1.00635	0.50975	-1.97421	0.0483581	1	HEBP2	heme binding protein 2 [Source:VGNC Symbol;Acc:VGNC:29798]
ENSBTAG00000033398	947.914	-1.01892	0.51863	-1.96463	0.0494569	1	HKDC1	hexokinase domain containing 1 [Source:VGNC Symbol;Acc:VGNC:29867]
ENSBTAG00000013880	406.538	-1.04397	0.517013	-2.01924	0.0434625	1	WWC1	WW and C2 domain containing 1 [Source:VGNC Symbol;Acc:VGNC:36974]
ENSBTAG00000004017	112.092	-1.12855	0.568103	-1.98652	0.0469758	1	PLEKHG2	pleckstrin homology and RhoGEF domain containing G2 [Source:VGNC Symbol;Acc:VGNC:33015]
ENSBTAG00000004190	478.219	-1.13411	0.565242	-2.00641	0.0448127	1	ARHGAP29	Rho GTPase activating protein 29 [Source:VGNC Symbol;Acc:VGNC:26087]
ENSBTAG00000021343	251.975	-1.14447	0.570894	-2.0047	0.044995	1	ARHGEF12	Rho guanine nucleotide exchange factor 12 [Source:VGNC Symbol;Acc:VGNC:26106]
ENSBTAG00000020520	134.983	-1.17702	0.590864	-1.99202	0.0463684	1	RASD1	ras related dexamethasone induced 1 [Source:VGNC Symbol;Acc:VGNC:33740]
ENSBTAG00000016667	93.6674	-1.21919	0.609954	-1.99883	0.0456269	1	ZBTB46	zinc finger and BTB domain containing 46 [Source:VGNC Symbol;Acc:VGNC:37084]
ENSBTAG00000005205	116.606	-1.25874	0.611872	-2.05719	0.0396681	1	DSE	dermatan sulfate epimerase [Source:VGNC Symbol;Acc:VGNC:53789]
ENSBTAG00000013222	152.999	-1.34183	0.676958	-1.98214	0.0474632	1	CD109	CD109 molecule [Source:VGNC Symbol;Acc:VGNC:27002]
ENSBTAG00000025165	30.3577	-1.37551	0.697239	-1.97279	0.0485192	1
ENSBTAG00000002956	118.057	-1.40077	0.714305	-1.96102	0.0498762	1	ZNF674	zinc finger protein 674 [Source:VGNC Symbol;Acc:VGNC:50044]
ENSBTAG00000012433	149.253	-1.57936	0.804806	-1.96241	0.0497151	1	DENND1B	DENN domain containing 1B [Source:NCBI gene;Acc:515939]
ENSBTAG00000019036	286.657	-1.75772	0.891951	-1.97065	0.0487645	1	ARHGAP28	Rho GTPase activating protein 28 [Source:VGNC Symbol;Acc:VGNC:26086]
ENSBTAG00000008721	117.052	-1.91301	0.957874	-1.99714	0.0458099	1	MANSC1	MANSC domain containing 1 [Source:VGNC Symbol;Acc:VGNC:31172]
ENSBTAG00000018297	81.4339	-2.05937	1.03911	-1.98186	0.0474951	1	PLEKHH1	pleckstrin homology, MyTH4 and FERM domain containing H1 [Source:VGNC Symbol;Acc:VGNC:33020]
ENSBTAG00000026769	108.181	-2.13343	1.0311	-2.06907	0.0385392	1	ASCL2	achaete-scute family bHLH transcription factor 2 [Source:VGNC Symbol;Acc:VGNC:26207]
ENSBTAG00000021669	40.2118	-2.20178	1.11959	-1.96658	0.0492311	1	SOGA1	suppressor of glucose, autophagy associated 1 [Source:VGNC Symbol;Acc:VGNC:35127]
ENSBTAG00000008307	26.0076	-2.68154	1.33754	-2.00482	0.0449819	1	PLCH1	phospholipase C eta 1 [Source:VGNC Symbol;Acc:VGNC:32990]
ENSBTAG00000019242	35.4152	-2.8925	1.40962	-2.05198	0.040172	1	CHRNB1	cholinergic receptor nicotinic beta 1 subunit [Source:VGNC Symbol;Acc:VGNC:27330]
ENSBTAG00000054428	13.4337	-3.23342	1.64271	-1.96835	0.0490278	1
ENSBTAG00000014906	31.3907	-3.45325	1.68104	-2.05424	0.0399528	1	VCAN	versican [Source:VGNC Symbol;Acc:VGNC:36778]
ENSBTAG00000054299	5.44049	-3.9299	2.00109	-1.96388	0.0495437	1
ENSBTAG00000051802	8.1913	-4.22665	2.07178	-2.0401	0.0413403	1
ENSBTAG00000011638	5.41389	-4.89289	2.36483	-2.06903	0.0385435	1
ENSBTAG00000012004	6.33355	-5.85031	2.93832	-1.99104	0.0464768	1	TGFB3	transforming growth factor beta 3 [Source:VGNC Symbol;Acc:VGNC:35803]
ENSBTAG00000031507	6.47554	-6.66335	3.2182	-2.07052	0.038404	1		PRAME family member 8-like [Source:NCBI gene;Acc:789138]
ENSBTAG00000033961	9.38939	-6.78386	3.31734	-2.04497	0.0408575	1	RNF217	ring finger protein 217 [Source:VGNC Symbol;Acc:VGNC:53802]
